# Supplementary material
Source: PubMed Central journal article supplement (PMC3817383)
Supplement: mmc2.pdf [file mmc2.pdf]

**Supplemental Table 1: Lifespan Assay Results and Statistical Analyses**

| Strain, Treatment                            | Maximum Lifespan<br>[Days ± SEM] | Mean Lifespan<br>[Days ± SEM] | P-value<br>vs. Control       | Number of<br>Experiments (n) | Number of<br>Nematodes (n) |
|----------------------------------------------|----------------------------------|-------------------------------|------------------------------|------------------------------|----------------------------|
| N2 control                                   | 36.1 ± 0.7                       | 23.9 ± 0.1                    | n.a.                         | 15                           | 1765                       |
| N2 + Rotenone                                | 39.7 ± 0.2                       | 26.2 ± 0.1                    | < 0.00001 <sup>*a</sup>      | 9                            | 997                        |
| N2 + Piericidin A                            | 34 ± 0.6                         | 25.1 ± 0.1                    | 0.00005 <sup>*a</sup>        | 3                            | 350                        |
| N2 + MPTP                                    | 40 ± 1.2                         | 25.8 ± 0.3                    | < 0.00001 <sup>*a</sup>      | 3                            | 351                        |
| N2 + BHA                                     | 35.7 ± 1.1                       | 23.8 ± 0.1                    | 0.68511 (n.s.) <sup>*a</sup> | 6                            | 715                        |
| N2 + BHA + Rotenone                          | 36.7 ± 0.7                       | 24.1 ± 0.1                    | 0.12434 (n.s.) <sup>*a</sup> | 3                            | 359                        |
| N2 + BHA + Piericidin A                      | 33.7 ± 0.8                       | 24.0 ± 0.2                    | 0.26871 (n.s.) <sup>*a</sup> | 3                            | 352                        |
| N2 control                                   | 35                               | 23.5 ± 0.2                    | 0.25083 (n.s.) <sup>*a</sup> | 3                            | 329                        |
| N2 + Rotenone 5d                             | 38.3 ± 0.7                       | 25.4 ± 0.5                    | 0.00063 <sup>*a</sup>        | 3                            | 319                        |
| N2 DR 1*10 <sup>10</sup> cfu / ml            | 31                               | 21.4                          | n.a.                         | 1                            | 90                         |
| N2 DR 1*10 <sup>10</sup> cfu / ml + Rotenone | 31                               | 24.3                          | < 0.00001 <sup>#b</sup>      | 1                            | 84                         |
| N2 DR 1*10 <sup>9</sup> cfu / ml             | 33                               | 22.2                          | 0.13592 (n.s.) <sup>#b</sup> | 1                            | 93                         |
| N2 DR 1*10 <sup>9</sup> cfu / ml + Rotenone  | 36                               | 23.7                          | 0.02908 <sup>#c</sup>        | 1                            | 83                         |
| N2 DR 5*10 <sup>8</sup> cfu / ml             | 33                               | 22.5                          | 0.12284 (n.s.) <sup>#b</sup> | 1                            | 68                         |
| N2 DR 5*10 <sup>8</sup> cfu / ml + Rotenone  | 37                               | 25.2                          | 0.00009 <sup>#d</sup>        | 1                            | 67                         |
| N2 DR 1*10 <sup>8</sup> cfu / ml             | 37                               | 28.6                          | < 0.00001 <sup>#b</sup>      | 1                            | 80                         |
| N2 DR 1*10 <sup>8</sup> cfu / ml + Rotenone  | 37                               | 28.2                          | 0.59673 (n.s.) <sup>#e</sup> | 1                            | 80                         |
| N2 DR 5*10 <sup>7</sup> cfu / ml             | 37                               | 29.3                          | < 0.00001 <sup>#b</sup>      | 1                            | 52                         |
| N2 DR 5*10 <sup>7</sup> cfu / ml + Rotenone  | 37                               | 28.9                          | 0.72869 (n.s.) <sup>#f</sup> | 1                            | 76                         |
| <i>aak-2</i>                                 | 27.3 ± 1.3                       | 19.1 ± 0.1                    | n.a.                         | 3                            | 362                        |
| <i>aak-2</i> + Rotenone                      | 34                               | 23.8 ± 0.4                    | 0.00047 <sup>*g</sup>        | 3                            | 364                        |
| <i>aak-2</i> + Piericidin A                  | 33                               | 21.0 ± 0.4                    | 0.00897 <sup>*g</sup>        | 3                            | 355                        |
| <i>sir-2.1</i>                               | 32.3 ± 0.3                       | 23.4 ± 0.1                    | n.a.                         | 3                            | 333                        |
| <i>sir-2.1</i> + Rotenone                    | 36.3 ± 0.3                       | 24.9 ± 0.1                    | 0.00002 <sup>*h</sup>        | 3                            | 384                        |
| <i>sir-2.1</i> + Piericidin A                | 36.3 ± 0.9                       | 24.3 ± 0.1                    | 0.00355 <sup>*h</sup>        | 3                            | 345                        |
| <i>aak-2/sir-2.1</i>                         | 26.7 ± 0.7                       | 18.8 ± 0.2                    | n.a.                         | 3                            | 328                        |
| <i>aak-2/sir-2.1</i> + Rotenone              | 34.3 ± 0.3                       | 21.0 ± 0.3                    | 0.01428 <sup>*i</sup>        | 3                            | 338                        |
| <i>aak-2/sir-2.1</i> + Piericidin A          | 32.7 ± 1.3                       | 20.4 ± 0.1                    | 0.00007 <sup>*i</sup>        | 3                            | 390                        |

|                                     |            |            |                              |   |     |
|-------------------------------------|------------|------------|------------------------------|---|-----|
| <i>pmk-1</i>                        | 37.3 ± 0.3 | 23.4 ± 0.2 | n.a.                         | 3 | 414 |
| <i>pmk-1</i> + Rotenone             | 37         | 18.9 ± 0.1 | 0.00004 <sup>*j</sup>        | 3 | 445 |
| <i>pmk-1</i> + Piericidin A         | 37         | 22.4 ± 0.2 | 0.04113 <sup>*j</sup>        | 3 | 438 |
| <i>daf-16</i>                       | 32         | 22.8 ± 0.1 | n.a.                         | 3 | 365 |
| <i>daf-16</i> + Rotenone            | 34.7 ± 0.7 | 24.0 ± 0.1 | 0.00052 <sup>*k</sup>        | 3 | 374 |
| <i>daf-16</i> + Piericidin A        | 35.3 ± 0.7 | 24.8 ± 0.1 | < 0.00001 <sup>*k</sup>      | 3 | 366 |
| <i>skn-1</i> (zu67)                 | 32.7 ± 0.7 | 19.0 ± 0.1 | n.a.                         | 3 | 279 |
| <i>skn-1</i> (zu67) + Rotenone      | 35.3 ± 0.7 | 20.3 ± 0.1 | 0.00201 <sup>*l</sup>        | 3 | 277 |
| <i>skn-1</i> (zu67) + Piericidin A  | 34.7 ± 1.3 | 20.6 ± 0.2 | 0.00205 <sup>*l</sup>        | 3 | 284 |
| <i>skn-1</i> (zu135)                | 30.3 ± 0.3 | 19.6 ± 0.3 | n.a.                         | 3 | 392 |
| <i>skn-1</i> (zu135) + Rotenone     | 30.7 ± 0.3 | 20.1 ± 0.2 | 0.24632 (n.s.) <sup>*m</sup> | 3 | 373 |
| <i>skn-1</i> (zu135) + Piericidin A | 30         | 19.1 ± 0.4 | 0.32025 (n.s.) <sup>*m</sup> | 3 | 393 |
| CX3596 ASI ablated                  | 42         | 25.8       | n.a.                         | 1 | 17  |
| CX3596 ASI ablated + Rot            | 40         | 24.9       | 0.53798 (n.s.) <sup>#n</sup> | 1 | 23  |
| <i>eat-2</i>                        | 40.1 ± 0.9 | 29.0 ± 0.5 | n.a.                         | 3 | 308 |
| <i>eat-2</i> + Rotenone             | 40.1 ± 0.9 | 29.1 ± 0.1 | 0.87067 (n.s.) <sup>*o</sup> | 3 | 300 |

\* P-Values according to *t*-test using mean lifespan data; # P-Values according to log-rank statistics

<sup>a</sup>N2 control; <sup>b</sup>N2 DR 1\*10<sup>10</sup> cfu / ml; <sup>c</sup>N2 DR 1\*10<sup>9</sup> cfu / ml; <sup>d</sup>N2 DR 5\*10<sup>8</sup> cfu / ml; <sup>e</sup>N2 DR 1\*10<sup>8</sup> cfu / ml; <sup>f</sup>N2 DR 5\*10<sup>7</sup> cfu / ml; <sup>g</sup>*aak-2*; <sup>h</sup>*sir-2.1*; <sup>i</sup>*aak-2/sir-2.1*; <sup>j</sup>*pmk-1*; <sup>k</sup>*daf-16*; <sup>l</sup>*skn-1* (zu67); <sup>m</sup>*skn-1* (zu135); <sup>n</sup>CX3596 ASI ablated; <sup>o</sup>*eat-2*

**Supplemental Table 2: Functional Classification of Up-Regulated DEGs  
after 24 hrs rotenone treatment.**

| <b>Annotation</b>                                             | <b>Number of DEGs</b> | <b>P -Value</b> |
|---------------------------------------------------------------|-----------------------|-----------------|
| <b>Cell Rescue, defense and virulence</b>                     | 601                   | 0.08790         |
| Stress response                                               | 431                   | 0.00153         |
| <b>Oxidative stress response</b>                              | 93                    | 0.00007         |
| Defense related proteins                                      | 198                   | < 0.00001       |
| Detoxification by modification                                | 63                    | 0.01089         |
| Glutathione conjugation reaction                              | 33                    | 0.00006         |
| Nutrient starvation response                                  | 17                    | 0.53430 (n.s.)  |
| <b>Energy</b>                                                 | 298                   | 0.00525         |
| Respiration                                                   | 71                    | 0.00023         |
| Metabolism of energy reserves (e.g. glycogen, trehalose)      | 19                    | 0.00228         |
| Oxidation of fatty acids                                      | 41                    | 0.29344 (n.s.)  |
| Energy conversion and regeneration                            | 79                    | 0.99999 (n.s.)  |
| Energy generation (e.g. ATP synthase)                         | 7                     | 0.57931 (n.s.)  |
| Glycolysis and gluconeogenesis                                | 24                    | 0.22449 (n.s.)  |
| <b>Metabolism</b>                                             | 1036                  | 0.19892 (n.s.)  |
| Amino acid metabolism                                         | 188                   | 0.34036 (n.s.)  |
| Metabolism of primary metabolic sugar derivatives             | 22                    | 0.52582 (n.s.)  |
| Lipid, fatty acid and isoprenoid metabolism                   | 372                   | 0.00858         |
| Metabolism of thioredoxin, glutaredoxin, glutathion           | 34                    | < 0.00001       |
| <b>Biogenesis of cellular components</b>                      | 727                   | 0.69168 (n.s.)  |
| Biogenesis of mitochondria                                    | 64                    | 0.00006         |
| <b>Cellular communication / signal transduction mechanism</b> | 867                   | < 0.00001       |
| Cellular signaling                                            | 452                   | < 0.00001       |
| Enzyme mediated signal transduction                           | 283                   | < 0.00001       |
| Second messenger mediated signal transduction                 | 150                   | 0.00005         |
| Transmembrane signal transduction                             | 628                   | < 0.00001       |

Selected functional classes/categories of DEGs. The number of genes and the p-values were determined using the FungiFun/FunCat categorization method.

**Supplemental Table 3: Differentially Expressed RNAs After 1 day Rotenone Treatment**

| <b>Ensembl Gene Id</b> | <b>Gene Symbol</b> | <b>Chromosome</b> | <b>log2 Fold Change</b> | <b>P-Value</b> |
|------------------------|--------------------|-------------------|-------------------------|----------------|
| F37B1.3                | gst-14             | chrII             | 4.403917                | 0.000000       |
| Y75B8A.39              | Y75B8A.39          | chrIII            | 3.968713                | 0.034882       |
| T10B9.4                | cyp-13A8           | chrII             | 3.383250                | 0.000000       |
| F54B11.4               | F54B11.4           | chrX              | 2.680910                | 0.009419       |
| C18H7.13               | C18H7.13           | chrIV             | 2.493516                | 0.000325       |
| C01G10.4               | C01G10.4           | chrV              | 2.251299                | 0.000000       |
| R04D3.1                | cyp-14A4           | chrX              | 2.236424                | 0.000000       |
| T20D4.12               | T20D4.12           | chrV              | 2.219519                | 0.015826       |
| B0205.13               | B0205.13           | chrI              | 2.192234                | 0.000000       |
| F22B5.4                | F22B5.4            | chrII             | 2.142294                | 0.000000       |
| B0205.14               | B0205.14           | chrI              | 2.141386                | 0.000000       |
| C01G10.5               | C01G10.5           | chrV              | 2.092844                | 0.000000       |
| AC3.1                  | sri-20             | chrV              | 2.079744                | 0.015160       |
| T25E12.10              | clec-38            | chrV              | 2.068765                | 0.022440       |
| F46C5.1                | F46C5.1            | chrII             | 1.974268                | 0.000152       |
| F09G2.3                | F09G2.3            | chrV              | 1.969344                | 0.000000       |
| F48F7.7                | arrd-24            | chrX              | 1.860721                | 0.006100       |
| B0334.10               | B0334.10           | chrII             | 1.857756                | 0.001182       |
| F32B4.1                | F32B4.1            | chrI              | 1.807176                | 0.042855       |
| F09C6.1                | F09C6.1            | chrV              | 1.792727                | 0.007523       |
| T10E10.3               | T10E10.3           | chrX              | 1.762773                | 0.003918       |
| F49H12.7               | F49H12.7           | chrX              | 1.741838                | 0.042855       |
| C43F9.7                | C43F9.7            | chrIV             | 1.717392                | 0.000401       |
| Y52B11A.1              | spe-38             | chrI              | 1.717142                | 0.001379       |
| R12G8.1                | R12G8.1            | chrV              | 1.715000                | 0.000240       |
| T24A6.7                | T24A6.7            | chrV              | 1.714871                | 0.029962       |
| C08E8.1                | C08E8.1            | chrV              | 1.708549                | 0.000338       |
| C01G10.6               | C01G10.6           | chrV              | 1.675144                | 0.000022       |
| T26C12.2               | T26C12.2           | chrIV             | 1.672997                | 0.003912       |
| ZC317.6                | ZC317.6            | chrV              | 1.669321                | 0.018821       |
| F37B1.8                | gst-19             | chrII             | 1.666571                | 0.000000       |
| F46A8.2                | F46A8.2            | chrI              | 1.656228                | 0.003351       |
| F11G11.13              | F11G11.13          | chrII             | 1.653183                | 0.000260       |
| EGAP5.1                | EGAP5.1            | chrX              | 1.611195                | 0.020692       |
| H02I12.2               | fbxb-76            | chrIV             | 1.600049                | 0.003351       |
| M01D7.9                | M01D7.9            | chrI              | 1.599919                | 0.038005       |
| F58G6.2                | srm-3              | chrIV             | 1.589316                | 0.002519       |
| K08E3.2                | K08E3.2            | chrIII            | 1.588156                | 0.009614       |
| CE7X_3.1               | CE7X_3.1           | chrX              | 1.585558                | 0.000000       |
| F14D7.5                | F14D7.5            | chrV              | 1.583613                | 0.033638       |
| C07E3.8                | C07E3.8            | chrII             | 1.582707                | 0.001270       |
| F17E9.11               | lys-10             | chrIV             | 1.557855                | 0.000000       |
| F13E9.12               | F13E9.12           | chrIV             | 1.557424                | 0.000011       |
| AH9.4                  | AH9.4              | chrX              | 1.552888                | 0.003156       |
| H01M10.2               | H01M10.2           | chrX              | 1.513913                | 0.033638       |
| Y51H7C.8               | Y51H7C.8           | chrII             | 1.502467                | 0.006801       |
| ZC84.7                 | ZC84.7             | chrIII            | 1.500473                | 0.033638       |
| D1025.8                | nspc-17            | chrX              | 1.482795                | 0.000043       |
| Y54G2A.8               | clec-82            | chrIV             | 1.479312                | 0.000027       |
| ZC239.17               | ZC239.17           | chrII             | 1.470412                | 0.035702       |
| B0524.5                | B0524.5            | chrIII            | 1.465763                | 0.008566       |
| K12G11.4               | sodh-2             | chrV              | 1.459788                | 0.000191       |
| Y74C9A.6               | Y74C9A.6           | chrI              | 1.444732                | 0.007259       |
| F56B6.6                | F56B6.6            | chrX              | 1.444467                | 0.000009       |
| F11A5.12               | stdh-2             | chrV              | 1.423057                | 0.006354       |
| T10H4.4                | T10H4.4            | chrV              | 1.415166                | 0.005304       |
| K01A6.5                | K01A6.5            | chrIV             | 1.406633                | 0.026086       |
| T22B2.6                | T22B2.6            | chrX              | 1.390511                | 0.000018       |
| C14A6.2                | C14A6.2            | chrV              | 1.388074                | 0.022748       |
| Y42A5A.3               | Y42A5A.3           | chrV              | 1.388009                | 0.000400       |

|            |            |        |          |          |
|------------|------------|--------|----------|----------|
| C37A5.11   | C37A5.11   | chrI   | 1.369717 | 0.000666 |
| C03A7.8    | abu-7      | chrV   | 1.358321 | 0.000347 |
| R155.4     | R155.4     | chrIII | 1.353019 | 0.017459 |
| F44D12.6   | F44D12.6   | chrIV  | 1.351514 | 0.000098 |
| R10H10.4   | R10H10.4   | chrIV  | 1.345499 | 0.000271 |
| C29F5.3    | C29F5.3    | chrII  | 1.344279 | 0.003438 |
| D1025.6    | nspc-16    | chrX   | 1.342578 | 0.022748 |
| T05C12.11  | T05C12.11  | chrII  | 1.342091 | 0.000005 |
| F11D5.5    | F11D5.5    | chrX   | 1.336025 | 0.015213 |
| T10D4.13   | ins-19     | chrII  | 1.335452 | 0.000052 |
| F26D11.2   | F26D11.2   | chrV   | 1.331824 | 0.015213 |
| W08A12.4   | W08A12.4   | chrV   | 1.327454 | 0.006783 |
| W02A2.3    | pqn-74     | chrIV  | 1.326852 | 0.000000 |
| Y116F11B.8 | Y116F11B.8 | chrV   | 1.325768 | 0.007573 |
| C45G9.15   | C45G9.15   | chrIII | 1.324433 | 0.013468 |
| T22F3.8    | T22F3.8    | chrV   | 1.322431 | 0.015213 |
| C24G7.2    | acd-1      | chrI   | 1.316811 | 0.002122 |
| F55F3.4    | F55F3.4    | chrX   | 1.311881 | 0.017880 |
| Y48G10A.7  | rpr-1      | chrI   | 1.309024 | 0.000535 |
| C12D5.4    | C12D5.4    | chrV   | 1.298622 | 0.048534 |
| F13E9.15   | F13E9.15   | chrIV  | 1.296978 | 0.000000 |
| K04A8.3    | K04A8.3    | chrV   | 1.293981 | 0.000017 |
| Y17G9A.5   | str-172    | chrIV  | 1.291768 | 0.046823 |
| F20B10.3   | F20B10.3   | chrIV  | 1.291233 | 0.000007 |
| C04E6.12   | C04E6.12   | chrV   | 1.289664 | 0.003427 |
| F38E11.1   | hsp-12.3   | chrIV  | 1.289293 | 0.000000 |
| W05F2.2    | W05F2.2    | chrI   | 1.286914 | 0.000961 |
| M04C3.4    | M04C3.4    | chrV   | 1.285117 | 0.002595 |
| K04A8.5    | lipI-4     | chrV   | 1.284870 | 0.000182 |
| ZC196.3    | ZC196.3    | chrV   | 1.267020 | 0.006770 |
| F55A4.9    | rncs-1     | chrX   | 1.264618 | 0.000000 |
| H34P18.1   | H34P18.1   | chrV   | 1.261239 | 0.000008 |
| F44C4.3    | cpr-4      | chrV   | 1.260916 | 0.000000 |
| C45G7.2    | ilys-2     | chrIV  | 1.258756 | 0.000803 |
| F53A9.8    | F53A9.8    | chrX   | 1.257092 | 0.000000 |
| T20D4.10   | T20D4.10   | chrV   | 1.256063 | 0.005892 |
| T07E3.2    | T07E3.2    | chrIII | 1.254455 | 0.002283 |
| Y57G11B.8  | Y57G11B.8  | chrIV  | 1.247743 | 0.027488 |
| F49A5.5    | clcc-28    | chrV   | 1.241073 | 0.026847 |
| W08E12.2   | W08E12.2   | chrIV  | 1.238253 | 0.000000 |
| F31C3.11   | rrn-2.1    | chrI   | 1.231807 | 0.000000 |
| ZC21.6     | ZC21.6     | chrIII | 1.227286 | 0.005077 |
| C34B4.7    | C34B4.7    | chrV   | 1.221468 | 0.000018 |
| Y39B6A.29  | Y39B6A.29  | chrV   | 1.220412 | 0.027488 |
| F44F4.10   | F44F4.10   | chrII  | 1.216209 | 0.001723 |
| C33H5.1    | C33H5.1    | chrIV  | 1.212960 | 0.003015 |
| F47F6.3    | oac-30     | chrII  | 1.207340 | 0.003465 |
| ZK1307.2   | ZK1307.2   | chrII  | 1.202615 | 0.048053 |
| C12D5.5    | C12D5.5    | chrV   | 1.199078 | 0.003427 |
| F20B6.1    | F20B6.1    | chrX   | 1.197285 | 0.013468 |
| F45E12.6   | F45E12.6   | chrII  | 1.193762 | 0.004449 |
| F17B5.1    | F17B5.1    | chrI   | 1.193498 | 0.041434 |
| T24C2.1    | ram-5      | chrX   | 1.188325 | 0.017474 |
| T06D8.2    | T06D8.2    | chrII  | 1.186298 | 0.027334 |
| F37C12.10  | F37C12.10  | chrIII | 1.173376 | 0.000000 |
| C24B9.9    | dod-3      | chrV   | 1.172634 | 0.000000 |
| R09H10.7   | R09H10.7   | chrIV  | 1.172617 | 0.000000 |
| C12D5.3    | C12D5.3    | chrV   | 1.169437 | 0.000017 |
| B0261.5    | B0261.5    | chrI   | 1.169280 | 0.000940 |
| C05B5.9    | C05B5.9    | chrIII | 1.168114 | 0.000051 |
| T08B2.4    | T08B2.4    | chrI   | 1.166373 | 0.001570 |
| B0286.6    | try-9      | chrII  | 1.164491 | 0.017977 |
| Y105C5B.14 | Y105C5B.14 | chrIV  | 1.164084 | 0.011719 |

|            |            |        |          |          |
|------------|------------|--------|----------|----------|
| R08A2.7    | R08A2.7    | chrV   | 1.162477 | 0.003911 |
| R03H4.6    | bus-1      | chrV   | 1.160093 | 0.003462 |
| K01H12.3   | nhr-38     | chrIV  | 1.159670 | 0.034828 |
| M04D8.6    | xbx-3      | chrIII | 1.155307 | 0.006785 |
| F09B12.7   | F09B12.7   | chrX   | 1.155210 | 0.000483 |
| T04A8.13   | T04A8.13   | chrIII | 1.151310 | 0.000017 |
| K02B12.9   | K02B12.9   | chrI   | 1.151108 | 0.008941 |
| Y46C8AL.8  | clec-74    | chrIV  | 1.148645 | 0.000030 |
| C14C6.5    | C14C6.5    | chrV   | 1.146775 | 0.000000 |
| K09H11.11  | K09H11.11  | chrV   | 1.145330 | 0.023212 |
| F29D10.1   | F29D10.1   | chrI   | 1.143739 | 0.020148 |
| T24F1.5    | T24F1.5    | chrII  | 1.141936 | 0.000000 |
| C53B7.5    | odr-10     | chrX   | 1.135491 | 0.005153 |
| M02D8.6    | M02D8.6    | chrX   | 1.132146 | 0.000000 |
| F11D11.12  | F11D11.12  | chrV   | 1.132049 | 0.036445 |
| C50F7.5    | C50F7.5    | chrIV  | 1.126167 | 0.000000 |
| C16D2.1    | C16D2.1    | chrII  | 1.125922 | 0.023673 |
| F41H10.34  | 21ur-8696  | chrIV  | 1.123775 | 0.012742 |
| ZC47.8     | ZC47.8     | chrIII | 1.119246 | 0.011101 |
| ZC404.11   | ZC404.11   | chrV   | 1.118940 | 0.002649 |
| F25H8.7    | spe-29     | chrIV  | 1.112584 | 0.000000 |
| ZK488.1    | nhr-250    | chrV   | 1.110013 | 0.035866 |
| ZC513.14   | ZC513.14   | chrV   | 1.108268 | 0.046667 |
| ZK652.5    | ceh-23     | chrIII | 1.106874 | 0.011381 |
| T10C6.12   | his-3      | chrV   | 1.102532 | 0.011585 |
| K08C7.5    | fmo-2      | chrIV  | 1.097321 | 0.000000 |
| F54B11.9   | F54B11.9   | chrX   | 1.092470 | 0.027334 |
| W08F4.7    | W08F4.7    | chrII  | 1.091019 | 0.000937 |
| Y22F5A.6   | lys-3      | chrV   | 1.090501 | 0.023673 |
| F46F11.12  | F46F11.12  | chrI   | 1.086505 | 0.029088 |
| ZC404.16   | ZC404.16   | chrV   | 1.085688 | 0.011585 |
| D1007.18   | D1007.18   | chrI   | 1.084094 | 0.000038 |
| Y71H2AM.25 | Y71H2AM.25 | chrIII | 1.083764 | 0.000030 |
| T05A10.6   | T05A10.6   | chrX   | 1.079868 | 0.001372 |
| K10D3.1    | glr-3      | chrI   | 1.076899 | 0.046667 |
| F37F2.3    | gst-25     | chrI   | 1.076745 | 0.041434 |
| F10G7.12   | F10G7.12   | chrII  | 1.073343 | 0.040233 |
| F02E11.4   | F02E11.4   | chrII  | 1.069296 | 0.046667 |
| C08B6.2    | C08B6.2    | chrV   | 1.067436 | 0.000021 |
| T10H9.6    | str-180    | chrV   | 1.063450 | 0.002706 |
| F09F7.8    | nspb-12    | chrIII | 1.062284 | 0.000180 |
| F15D4.6    | F15D4.6    | chrII  | 1.062203 | 0.000433 |
| D2092.8    | D2092.8    | chrI   | 1.056494 | 0.000437 |
| ZK849.4    | ZK849.4    | chrI   | 1.055907 | 0.049683 |
| F16H6.1    | clec-42    | chrV   | 1.055612 | 0.026135 |
| ZC239.22   | ZC239.22   | chrII  | 1.053997 | 0.000201 |
| Y75B8A.44  | Y75B8A.44  | chrIII | 1.053475 | 0.000000 |
| C04G2.3    | C04G2.3    | chrIV  | 1.052235 | 0.003887 |
| W02B8.5    | hot-3      | chrII  | 1.050029 | 0.000489 |
| F18A1.1    | F18A1.1    | chrII  | 1.048744 | 0.002258 |
| Y105C5A.2  | Y105C5A.2  | chrIV  | 1.046441 | 0.027334 |
| Y69A2AR.9  | Y69A2AR.9  | chrIV  | 1.044731 | 0.000315 |
| C01G12.7   | C01G12.7   | chrII  | 1.042979 | 0.016992 |
| R08F11.3   | cyp-33C8   | chrV   | 1.042236 | 0.000000 |
| Y37D8A.8   | Y37D8A.8   | chrIII | 1.041459 | 0.046667 |
| F40B5.3    | F40B5.3    | chrX   | 1.040649 | 0.022525 |
| T06G6.6    | T06G6.6    | chrI   | 1.040106 | 0.003179 |
| ZK353.2    | ZK353.2    | chrIII | 1.039447 | 0.004988 |
| Y116F11B.1 | daf-28     | chrV   | 1.038854 | 0.000000 |
| C32B5.11   | fbxc-41    | chrII  | 1.037170 | 0.038704 |
| Y75B7AR.1  | Y75B7AR.1  | chrV   | 1.034093 | 0.000000 |
| C33F10.9   | msp-40     | chrII  | 1.032742 | 0.000108 |
| F07F6.5    | dct-5      | chrII  | 1.031180 | 0.000009 |

|            |            |        |          |          |
|------------|------------|--------|----------|----------|
| T28H11.7   | T28H11.7   | chrIV  | 1.030942 | 0.000123 |
| VZK822L.2  | VZK822L.2  | chrIV  | 1.029605 | 0.001173 |
| K04A8.4    | twk-10     | chrV   | 1.021263 | 0.000047 |
| M110.9     | M110.9     | chrII  | 1.020768 | 0.020148 |
| T25D3.3    | T25D3.3    | chrII  | 1.018551 | 0.038704 |
| M01H9.2    | M01H9.2    | chrIV  | 1.016491 | 0.000000 |
| C39B10.6   | elt-4      | chrX   | 1.015440 | 0.012742 |
| C17F4.7    | C17F4.7    | chrII  | 1.014960 | 0.000000 |
| D2023.8    | D2023.8    | chrV   | 1.013539 | 0.001280 |
| C25A1.6    | C25A1.6    | chrI   | 1.013000 | 0.002151 |
| F14D7.8    | F14D7.8    | chrV   | 1.011588 | 0.035381 |
| ZK863.9    | clcc-224   | chrV   | 1.010659 | 0.016405 |
| F14F8.8    | F14F8.8    | chrV   | 1.008750 | 0.003091 |
| C17F3.3    | C17F3.3    | chrI   | 1.007917 | 0.000162 |
| R11G11.6   | R11G11.6   | chrV   | 1.007263 | 0.002789 |
| F26A1.15   | acbp-7     | chrIII | 1.003245 | 0.000008 |
| F56C4.1    | F56C4.1    | chrIV  | 1.001205 | 0.003179 |
| C02B4.4    | C02B4.4    | chrX   | 1.000295 | 0.030604 |
| C05E11.6   | C05E11.6   | chrX   | 0.999138 | 0.000478 |
| R08F11.6   | fpn-1.3    | chrV   | 0.999086 | 0.003444 |
| F23A7.4    | F23A7.4    | chrX   | 0.995827 | 0.000000 |
| Y71G12B.3  | Y71G12B.3  | chrI   | 0.995791 | 0.009987 |
| Y37F4.7    | Y37F4.7    | chrI   | 0.995724 | 0.000008 |
| F45G2.1    | nas-1      | chrIII | 0.994369 | 0.001907 |
| ZK470.1    | ZK470.1    | chrX   | 0.993707 | 0.002987 |
| C54F6.12   | C54F6.12   | chrV   | 0.993103 | 0.001543 |
| E02H9.2    | E02H9.2    | chrIII | 0.993075 | 0.000066 |
| Y34F4.2    | Y34F4.2    | chrIII | 0.992323 | 0.000000 |
| D2024.4    | D2024.4    | chrIV  | 0.990800 | 0.017403 |
| H03G16.3   | H03G16.3   | chrX   | 0.988131 | 0.007594 |
| C06E4.8    | C06E4.8    | chrIV  | 0.987913 | 0.012306 |
| Y53F4B.37  | gst-32     | chrII  | 0.987164 | 0.013097 |
| F53H2.4    | F53H2.4    | chrV   | 0.986427 | 0.000000 |
| F48A9.3    | try-6      | chrI   | 0.984962 | 0.000793 |
| C54D2.1    | C54D2.1    | chrX   | 0.983517 | 0.000001 |
| F14F9.6    | F14F9.6    | chrV   | 0.983278 | 0.000186 |
| C10G8.7    | ceh-33     | chrV   | 0.981695 | 0.024161 |
| C54F6.5    | C54F6.5    | chrV   | 0.981216 | 0.000668 |
| Y80D3A.10  | nlp-42     | chrV   | 0.976678 | 0.000000 |
| K01D12.11  | cdr-4      | chrV   | 0.976485 | 0.000000 |
| ZK783.6    | ZK783.6    | chrIII | 0.975587 | 0.027873 |
| C15C8.5    | C15C8.5    | chrV   | 0.975575 | 0.001459 |
| Y48G8AL.12 | Y48G8AL.12 | chrI   | 0.973046 | 0.000000 |
| T08B6.2    | T08B6.2    | chrIV  | 0.972745 | 0.017582 |
| C53D6.10   | C53D6.10   | chrIV  | 0.971727 | 0.000046 |
| K03H1.12   | K03H1.12   | chrIII | 0.968237 | 0.021908 |
| R02E4.3    | R02E4.3    | chrX   | 0.967788 | 0.000011 |
| K09C6.1    | K09C6.1    | chrV   | 0.965399 | 0.017183 |
| Y37F4.8    | Y37F4.8    | chrI   | 0.963192 | 0.019063 |
| T10B5.2    | T10B5.2    | chrV   | 0.963094 | 0.006339 |
| H25K10.1   | H25K10.1   | chrIV  | 0.962896 | 0.000000 |
| T01C1.4    | T01C1.4    | chrX   | 0.962779 | 0.003731 |
| F44B9.10   | F44B9.10   | chrIII | 0.961807 | 0.002440 |
| T03G11.10  | T03G11.10  | chrX   | 0.959704 | 0.034828 |
| T28B8.5    | del-4      | chrI   | 0.958001 | 0.045476 |
| F54D1.1    | F54D1.1    | chrIV  | 0.957813 | 0.000208 |
| C16C4.15   | math-10    | chrII  | 0.957561 | 0.000827 |
| C30F2.4    | C30F2.4    | chrX   | 0.956669 | 0.026623 |
| Y47G6A.26  | Y47G6A.26  | chrI   | 0.956300 | 0.000122 |
| T28C6.10   | T28C6.10   | chrIV  | 0.954009 | 0.000033 |
| K07C5.9    | K07C5.9    | chrV   | 0.953930 | 0.000043 |
| C01H6.1    | col-61     | chrI   | 0.952782 | 0.002071 |
| T05H4.7    | T05H4.7    | chrV   | 0.952325 | 0.008696 |

|           |           |        |          |          |
|-----------|-----------|--------|----------|----------|
| K08D12.4  | K08D12.4  | chrIV  | 0.951949 | 0.019712 |
| F22D6.16  | F22D6.16  | chrI   | 0.951860 | 0.049683 |
| ZK856.4   | ZK856.4   | chrV   | 0.951046 | 0.007905 |
| K06A1.2   | K06A1.2   | chrII  | 0.950333 | 0.034382 |
| C02A12.4  | lys-7     | chrV   | 0.950103 | 0.000000 |
| T03D8.4   | grl-14    | chrV   | 0.948596 | 0.001306 |
| F13G3.8   | eat-5     | chrI   | 0.945562 | 0.000471 |
| C25G6.4   | C25G6.4   | chrX   | 0.944854 | 0.000003 |
| C05E7.3   | C05E7.3   | chrX   | 0.943777 | 0.001565 |
| F42F12.9  | nspc-10   | chrX   | 0.940507 | 0.000000 |
| C29F5.4   | mps-1     | chrII  | 0.939908 | 0.034824 |
| F59D6.1   | F59D6.1   | chrV   | 0.938633 | 0.003159 |
| Y47D3A.30 | elo-8     | chrIII | 0.937641 | 0.000126 |
| C37C3.11  | C37C3.11  | chrV   | 0.935260 | 0.048489 |
| K10D3.6   | K10D3.6   | chrI   | 0.935231 | 0.000000 |
| K07H8.11  | K07H8.11  | chrIV  | 0.931694 | 0.003711 |
| F27C8.2   | F27C8.2   | chrIV  | 0.925832 | 0.015746 |
| F46C5.3   | nas-25    | chrII  | 0.925201 | 0.002909 |
| C41G7.6   | C41G7.6   | chrI   | 0.923184 | 0.000000 |
| F17C11.14 | F17C11.14 | chrV   | 0.921945 | 0.009465 |
| C43C3.4   | C43C3.4   | chrX   | 0.916379 | 0.026711 |
| W09D6.4   | W09D6.4   | chrIII | 0.915443 | 0.009465 |
| C32B5.6   | C32B5.6   | chrII  | 0.914884 | 0.000937 |
| R08F11.4  | R08F11.4  | chrV   | 0.910113 | 0.000000 |
| C03G6.13  | tag-293   | chrV   | 0.904962 | 0.004869 |
| Y17G9A.2  | Y17G9A.2  | chrIV  | 0.904283 | 0.000508 |
| C06E8.5   | C06E8.5   | chrIII | 0.902883 | 0.000000 |
| D1025.7   | nspc-18   | chrX   | 0.902524 | 0.000052 |
| M03D4.3   | M03D4.3   | chrIV  | 0.901061 | 0.000095 |
| Y119C1B.1 | Y119C1B.1 | chrI   | 0.900033 | 0.002935 |
| H34I24.1  | H34I24.1  | chrIII | 0.899590 | 0.005808 |
| AC3.10    | spe-10    | chrV   | 0.896772 | 0.006964 |
| F56B3.10  | gst-40    | chrIV  | 0.894875 | 0.000612 |
| C40H1.8   | C40H1.8   | chrIII | 0.893704 | 0.000000 |
| F54G8.2   | dgk-3     | chrIII | 0.892535 | 0.010255 |
| F14D2.5   | F14D2.5   | chrII  | 0.892359 | 0.000166 |
| T23B3.6   | T23B3.6   | chrI   | 0.892040 | 0.008182 |
| M163.8    | M163.8    | chrX   | 0.891440 | 0.000000 |
| C45H4.17  | cyp-33C2  | chrV   | 0.891260 | 0.009987 |
| Y17G9A.3  | Y17G9A.3  | chrIV  | 0.891196 | 0.005030 |
| F49F1.5   | F49F1.5   | chrIV  | 0.890778 | 0.000007 |
| F01D5.5   | F01D5.5   | chrII  | 0.889103 | 0.000000 |
| Y48B6A.4  | eat-2     | chrII  | 0.887659 | 0.001898 |
| B0281.6   | B0281.6   | chrII  | 0.887489 | 0.032272 |
| F53G12.8  | F53G12.8  | chrI   | 0.886895 | 0.000207 |
| C34B2.3   | C34B2.3   | chrI   | 0.885372 | 0.017183 |
| C54D10.1  | cdr-2     | chrV   | 0.883247 | 0.000000 |
| D1025.4   | nspc-20   | chrX   | 0.883109 | 0.000000 |
| C53B4.2   | C53B4.2   | chrIV  | 0.882870 | 0.012306 |
| C49A1.3   | C49A1.3   | chrI   | 0.882269 | 0.045868 |
| B0024.15  | B0024.15  | chrV   | 0.879781 | 0.028450 |
| H04M03.12 | H04M03.12 | chrIV  | 0.878717 | 0.000007 |
| Y11D7A.11 | col-120   | chrIV  | 0.878296 | 0.000000 |
| F55A12.6  | F55A12.6  | chrI   | 0.877855 | 0.015576 |
| F36H12.3  | F36H12.3  | chrIV  | 0.876441 | 0.000039 |
| E02H9.9   | E02H9.9   | chrIII | 0.874527 | 0.006044 |
| Y47D7A.15 | Y47D7A.15 | chrV   | 0.872842 | 0.000000 |
| T27A3.4   | T27A3.4   | chrI   | 0.872223 | 0.000004 |
| B0412.6   | B0412.6   | chrIII | 0.871437 | 0.007068 |
| F52F12.2  | col-64    | chrI   | 0.869423 | 0.045476 |
| F41G3.18  | F41G3.18  | chrII  | 0.868820 | 0.000004 |
| ZC204.10  | fbxb-16   | chrII  | 0.867686 | 0.002380 |
| F17C8.7   | F17C8.7   | chrIII | 0.867219 | 0.031639 |



|            |            |        |          |          |
|------------|------------|--------|----------|----------|
| ZC482.1    | gab-1      | chrIII | 0.865469 | 0.002316 |
| T06E4.12   | T06E4.12   | chrV   | 0.865330 | 0.000000 |
| ZK354.3    | ZK354.3    | chrIV  | 0.864205 | 0.000001 |
| W07A12.8   | W07A12.8   | chrII  | 0.864048 | 0.000001 |
| ZK546.11   | gst-30     | chrII  | 0.863740 | 0.000004 |
| R11G11.14  | lipI-3     | chrV   | 0.862667 | 0.015576 |
| R12E2.15   | R12E2.15   | chrI   | 0.862246 | 0.000000 |
| B0213.17   | nlp-34     | chrV   | 0.862197 | 0.000124 |
| C30H6.10   | C30H6.10   | chrIV  | 0.861138 | 0.000004 |
| D1022.6    | sro-1      | chrII  | 0.860803 | 0.002883 |
| C02B8.4    | hlh-8      | chrX   | 0.860710 | 0.005338 |
| F25H5.2    | F25H5.2    | chrI   | 0.859297 | 0.000505 |
| K09H9.3    | col-49     | chrI   | 0.858886 | 0.000000 |
| C43G2.4    | C43G2.4    | chrIV  | 0.858547 | 0.000009 |
| C44C1.6    | C44C1.6    | chrX   | 0.858397 | 0.000042 |
| K01D12.4   | twk-14     | chrV   | 0.858090 | 0.004719 |
| C03F11.2   | C03F11.2   | chrX   | 0.857816 | 0.042822 |
| T05G5.4    | T05G5.4    | chrIII | 0.856934 | 0.000760 |
| T03F6.9    | T03F6.9    | chrIII | 0.856928 | 0.044527 |
| F22D6.10   | col-60     | chrI   | 0.856509 | 0.000000 |
| Y51A2D.11  | ttr-26     | chrV   | 0.856084 | 0.000000 |
| R12G8.2    | twk-36     | chrV   | 0.855859 | 0.018952 |
| ZK353.10   | ZK353.10   | chrIII | 0.855663 | 0.021690 |
| K02E11.6   | K02E11.6   | chrV   | 0.855134 | 0.000008 |
| F32G8.5    | col-152    | chrV   | 0.855029 | 0.000672 |
| B0554.6    | dod-20     | chrV   | 0.854538 | 0.049064 |
| C35C5.8    | C35C5.8    | chrX   | 0.854356 | 0.000000 |
| F36D4.4    | F36D4.4    | chrV   | 0.852810 | 0.011886 |
| Y51H4A.5   | Y51H4A.5   | chrIV  | 0.852288 | 0.002430 |
| B0244.9    | B0244.9    | chrIII | 0.850686 | 0.005970 |
| R12E2.14   | R12E2.14   | chrI   | 0.850675 | 0.000012 |
| C29E4.12   | C29E4.12   | chrIII | 0.849005 | 0.000041 |
| C31G12.2   | clcc-245   | chrV   | 0.848558 | 0.000091 |
| F20B6.9    | F20B6.9    | chrX   | 0.848033 | 0.000161 |
| B0491.2    | sqtl-1     | chrII  | 0.847181 | 0.000000 |
| T23B3.5    | T23B3.5    | chrI   | 0.847153 | 0.000000 |
| F46A9.1    | F46A9.1    | chrI   | 0.846619 | 0.003611 |
| R06F6.7    | R06F6.7    | chrII  | 0.846461 | 0.000000 |
| K02D3.2    | K02D3.2    | chrX   | 0.845580 | 0.023048 |
| B0416.2    | B0416.2    | chrX   | 0.845192 | 0.000001 |
| C01G12.9   | C01G12.9   | chrII  | 0.845043 | 0.030502 |
| T22H6.7    | abf-6      | chrX   | 0.844100 | 0.000000 |
| F53B2.5    | F53B2.5    | chrIV  | 0.843530 | 0.004801 |
| K10H10.4   | K10H10.4   | chrII  | 0.842395 | 0.000000 |
| F09G2.6    | ugt-36     | chrV   | 0.842155 | 0.003137 |
| F14D2.7    | F14D2.7    | chrII  | 0.842092 | 0.000000 |
| F38A1.9    | F38A1.9    | chrIV  | 0.842041 | 0.000002 |
| R09A8.4    | col-182    | chrX   | 0.841579 | 0.000010 |
| T06E4.9    | T06E4.9    | chrV   | 0.841285 | 0.001418 |
| T10B9.9    | T10B9.9    | chrII  | 0.840765 | 0.023345 |
| K08D12.5   | bus-2      | chrIV  | 0.836733 | 0.021357 |
| K07E3.9    | K07E3.9    | chrX   | 0.835612 | 0.034943 |
| Y110A2AM.4 | Y110A2AM.4 | chrII  | 0.834947 | 0.000000 |
| C34B4.4    | C34B4.4    | chrV   | 0.834414 | 0.034824 |
| Y71H2AM.16 | pho-9      | chrIII | 0.833754 | 0.000000 |
| C37C3.12   | C37C3.12   | chrV   | 0.833350 | 0.000001 |
| F36H12.5   | F36H12.5   | chrIV  | 0.832945 | 0.000447 |
| W05G11.3   | col-88     | chrIII | 0.831653 | 0.000000 |
| F55H12.2   | F55H12.2   | chrI   | 0.830976 | 0.000062 |
| C49H3.12   | C49H3.12   | chrIV  | 0.830480 | 0.012029 |
| F58B3.2    | lys-5      | chrIV  | 0.830341 | 0.000048 |
| K09G1.2    | K09G1.2    | chrV   | 0.829109 | 0.023345 |
| K11G9.6    | mtl-1      | chrV   | 0.828982 | 0.000019 |

|            |           |        |          |          |
|------------|-----------|--------|----------|----------|
| Y48G9A.7   | Y48G9A.7  | chrIII | 0.828633 | 0.048191 |
| F33A8.9    | col-83    | chrII  | 0.828289 | 0.042642 |
| K07F5.8    | K07F5.8   | chrIV  | 0.828102 | 0.026723 |
| F56D6.15   | clec-69   | chrIV  | 0.828029 | 0.030245 |
| T06E4.14   | T06E4.14  | chrV   | 0.826556 | 0.000000 |
| T02C12.5   | T02C12.5  | chrIII | 0.825683 | 0.011344 |
| F11C7.7    | F11C7.7   | chrX   | 0.825023 | 0.003270 |
| F37B1.1    | gst-24    | chrII  | 0.824793 | 0.000000 |
| F17C8.2    | col-89    | chrIII | 0.824712 | 0.000050 |
| F33E2.8    | F33E2.8   | chrI   | 0.824401 | 0.015703 |
| C01H6.3    | C01H6.3   | chrI   | 0.823485 | 0.049966 |
| C45E1.4    | C45E1.4   | chrI   | 0.823297 | 0.000000 |
| M04C7.1    | gpa-15    | chrI   | 0.821608 | 0.004454 |
| C40H1.7    | C40H1.7   | chrIII | 0.821383 | 0.000000 |
| F35H8.4    | F35H8.4   | chrII  | 0.821293 | 0.003527 |
| F09E10.11  | tts-1     | chrX   | 0.820250 | 0.000000 |
| F14D7.12   | F14D7.12  | chrV   | 0.820160 | 0.004719 |
| T10E10.6   | col-170   | chrX   | 0.820048 | 0.000002 |
| ZC116.5    | ZC116.5   | chrV   | 0.817888 | 0.002494 |
| F35E12.4   | F35E12.4  | chrV   | 0.817365 | 0.003481 |
| Y57G7A.5   | Y57G7A.5  | chrII  | 0.816757 | 0.007824 |
| C34H4.4    | col-107   | chrIV  | 0.816238 | 0.000000 |
| C52D10.13  | col-138   | chrIV  | 0.815522 | 0.000000 |
| ZK1025.3   | ZK1025.3  | chrI   | 0.814653 | 0.000000 |
| K02E11.4   | K02E11.4  | chrV   | 0.813254 | 0.000006 |
| C55C2.5    | aat-5     | chrI   | 0.812166 | 0.000000 |
| F36D1.7    | F36D1.7   | chrI   | 0.811453 | 0.008903 |
| Y23B4A.2   | Y23B4A.2  | chrX   | 0.810454 | 0.000053 |
| W01D2.3    | W01D2.3   | chrII  | 0.810305 | 0.003387 |
| F59B10.3   | F59B10.3  | chrII  | 0.810299 | 0.000041 |
| F59E11.2   | F59E11.2  | chrV   | 0.809864 | 0.000461 |
| C35B8.1    | col-175   | chrX   | 0.809647 | 0.000000 |
| F59B10.4   | F59B10.4  | chrII  | 0.809223 | 0.000000 |
| F58A3.4    | F58A3.4   | chrX   | 0.809218 | 0.018982 |
| F29B9.7    | F29B9.7   | chrIV  | 0.809120 | 0.020441 |
| F38G1.2    | egl-17    | chrX   | 0.808706 | 0.030502 |
| F09D12.2   | F09D12.2  | chrIV  | 0.808665 | 0.001492 |
| K07A12.6   | hot-5     | chrI   | 0.808035 | 0.011066 |
| T05C1.2    | T05C1.2   | chrII  | 0.807547 | 0.025010 |
| C53A5.5    | C53A5.5   | chrV   | 0.807484 | 0.000001 |
| Y51A2D.12  | srg-34    | chrV   | 0.807155 | 0.039664 |
| F15A4.6    | F15A4.6   | chrII  | 0.806884 | 0.000000 |
| C39D10.2   | C39D10.2  | chrX   | 0.806639 | 0.000007 |
| T23B7.1    | nspd-4    | chrII  | 0.805723 | 0.008278 |
| ZC376.8    | ZC376.8   | chrV   | 0.805155 | 0.010704 |
| Y32G9A.10  | Y32G9A.10 | chrV   | 0.804228 | 0.013598 |
| C08F11.1   | C08F11.1  | chrIV  | 0.802839 | 0.000000 |
| K01D12.5   | K01D12.5  | chrV   | 0.801087 | 0.003344 |
| F17A9.1    | fbxa-178  | chrV   | 0.800289 | 0.032395 |
| F26A10.1   | F26A10.1  | chrX   | 0.800013 | 0.002465 |
| F35C5.10   | nspb-11   | chrII  | 0.800006 | 0.039664 |
| C18D4.8    | C18D4.8   | chrV   | 0.798831 | 0.000007 |
| H08M01.1   | H08M01.1  | chrIV  | 0.798767 | 0.019858 |
| F35C5.12   | F35C5.12  | chrII  | 0.797423 | 0.000038 |
| F40H6.1    | F40H6.1   | chrIII | 0.797097 | 0.001375 |
| C07H6.9    | C07H6.9   | chrIII | 0.796531 | 0.003777 |
| F11D5.7    | F11D5.7   | chrX   | 0.796433 | 0.000202 |
| Y57A10A.11 | rol-1     | chrII  | 0.796065 | 0.000000 |
| Y67A6A.1   | Y67A6A.1  | chrI   | 0.795481 | 0.002630 |
| F35C11.1   | nlp-5     | chrII  | 0.795320 | 0.000998 |
| Y71A12C.2  | Y71A12C.2 | chrI   | 0.794770 | 0.000352 |
| F27C8.4    | spp-18    | chrIV  | 0.794657 | 0.000000 |
| F53A9.7    | F53A9.7   | chrX   | 0.793101 | 0.000000 |

|            |            |        |          |          |
|------------|------------|--------|----------|----------|
| Y37H2A.13  | Y37H2A.13  | chrV   | 0.791853 | 0.045370 |
| Y10G11A.90 | Y10G11A.90 | chrIV  | 0.791656 | 0.000000 |
| F22D6.8    | F22D6.8    | chrI   | 0.791501 | 0.000000 |
| F23C8.13   | F23C8.13   | chrI   | 0.791456 | 0.000238 |
| T01B7.7    | rol-6      | chrII  | 0.791363 | 0.000000 |
| Y39F10C.2  | Y39F10C.2  | chrII  | 0.791004 | 0.032593 |
| F44G4.7    | F44G4.7    | chrII  | 0.790740 | 0.048191 |
| T21F2.1    | lgc-53     | chrX   | 0.790443 | 0.011389 |
| T27A10.2   | T27A10.2   | chrX   | 0.790339 | 0.002851 |
| ZK673.1    | ZK673.1    | chrII  | 0.789470 | 0.000000 |
| F54D12.4   | F54D12.4   | chrII  | 0.788380 | 0.000000 |
| F41G3.10   | F41G3.10   | chrII  | 0.787889 | 0.000000 |
| C17E7.3    | sre-9      | chrV   | 0.786295 | 0.028434 |
| Y43B11AR.7 | Y43B11AR.7 | chrIV  | 0.786099 | 0.000000 |
| T27B7.4    | nhr-115    | chrV   | 0.785353 | 0.000180 |
| W08F4.12   | W08F4.12   | chrII  | 0.784584 | 0.003556 |
| F58F6.1    | col-104    | chrIV  | 0.784554 | 0.000000 |
| F40F12.9   | F40F12.9   | chrIII | 0.784350 | 0.000913 |
| K07D4.9    | K07D4.9    | chrII  | 0.784001 | 0.000000 |
| R07H5.9    | R07H5.9    | chrIV  | 0.783988 | 0.000066 |
| Y41E3.22   | Y41E3.22   | chrIV  | 0.783380 | 0.007365 |
| W03D2.6    | W03D2.6    | chrIV  | 0.782361 | 0.000000 |
| Y69A2AR.5  | daao-1     | chrIV  | 0.781701 | 0.000000 |
| F28D1.5    | thn-2      | chrIV  | 0.781568 | 0.000000 |
| Y54E2A.5   | Y54E2A.5   | chrII  | 0.780313 | 0.047355 |
| F14F7.4    | F14F7.4    | chrIII | 0.780042 | 0.020912 |
| C14A6.6    | C14A6.6    | chrV   | 0.779909 | 0.023288 |
| C13D9.8    | ncx-9      | chrV   | 0.779733 | 0.001065 |
| E03H12.5   | E03H12.5   | chrIV  | 0.779695 | 0.000000 |
| T05C12.3   | T05C12.3   | chrII  | 0.779031 | 0.016547 |
| Y9C9A.6    | str-168    | chrIV  | 0.778960 | 0.012006 |
| Y37A1B.15  | gei-18     | chrIV  | 0.778795 | 0.005714 |
| T24D5.6    | T24D5.6    | chrX   | 0.778607 | 0.000001 |
| F49E8.6    | F49E8.6    | chrIV  | 0.777893 | 0.002102 |
| F33D11.8   | F33D11.8   | chrI   | 0.776417 | 0.002655 |
| Y50E8A.12  | Y50E8A.12  | chrV   | 0.774983 | 0.006354 |
| T19C3.2    | T19C3.2    | chrIII | 0.774595 | 0.000000 |
| C06B3.2    | oac-3      | chrV   | 0.774277 | 0.022033 |
| T25B9.11   | T25B9.11   | chrIV  | 0.773798 | 0.001165 |
| F48G7.5    | F48G7.5    | chrV   | 0.772979 | 0.002030 |
| F16F9.3    | F16F9.3    | chrX   | 0.772849 | 0.000988 |
| T10H9.8    | T10H9.8    | chrV   | 0.772194 | 0.000000 |
| F54C9.4    | col-38     | chrII  | 0.771970 | 0.000000 |
| MTCE.34    | MTCE.34    | chrM   | 0.771818 | 0.000000 |
| M04D8.2    | ins-22     | chrIII | 0.770201 | 0.001913 |
| F39G3.1    | ugt-61     | chrV   | 0.770121 | 0.000000 |
| F12E12.5   | sdz-12     | chrII  | 0.769774 | 0.000235 |
| F26G1.2    | F26G1.2    | chrII  | 0.769318 | 0.000041 |
| F08H9.2    | F08H9.2    | chrV   | 0.768858 | 0.000000 |
| F07H5.7    | F07H5.7    | chrII  | 0.768496 | 0.002684 |
| C49C8.1    | C49C8.1    | chrIV  | 0.768462 | 0.017896 |
| Y38F1A.4   | Y38F1A.4   | chrII  | 0.767106 | 0.017283 |
| R12C12.3   | R12C12.3   | chrII  | 0.766317 | 0.011347 |
| C54G4.2    | C54G4.2    | chrI   | 0.765126 | 0.015248 |
| T22B3.3    | T22B3.3    | chrIV  | 0.763932 | 0.000007 |
| F39C12.4   | F39C12.4   | chrX   | 0.763635 | 0.003193 |
| ZK287.8    | her-1      | chrV   | 0.763282 | 0.002684 |
| F32A11.7   | mltn-1     | chrII  | 0.762820 | 0.000000 |
| Y62H9A.13  | Y62H9A.13  | chrX   | 0.762709 | 0.021819 |
| C04G2.1    | ttr-39     | chrIV  | 0.761587 | 0.000002 |
| T12B5.6    | fbxa-55    | chrIII | 0.761092 | 0.000000 |
| C03C11.1   | C03C11.1   | chrI   | 0.760200 | 0.003192 |
| T05E12.3   | T05E12.3   | chrV   | 0.759604 | 0.000000 |

|            |           |        |          |          |
|------------|-----------|--------|----------|----------|
| T26G10.5   | T26G10.5  | chrIII | 0.759355 | 0.031557 |
| F22E5.13   | F22E5.13  | chrII  | 0.759254 | 0.012733 |
| R07E5.6    | R07E5.6   | chrIII | 0.758526 | 0.000551 |
| C03A7.12   | C03A7.12  | chrV   | 0.758486 | 0.000001 |
| C11H1.5    | C11H1.5   | chrX   | 0.757737 | 0.019119 |
| F41G3.1    | F41G3.1   | chrII  | 0.757480 | 0.000000 |
| C55A6.11   | C55A6.11  | chrV   | 0.756645 | 0.023345 |
| Y53C12B.7  | Y53C12B.7 | chrII  | 0.756197 | 0.000000 |
| T13F3.8    | T13F3.8   | chrV   | 0.755580 | 0.000929 |
| W03A5.3    | grl-22    | chrIII | 0.755556 | 0.000018 |
| Y5H2B.5    | cyp-32B1  | chrV   | 0.755483 | 0.001302 |
| F42F12.6   | nspc-13   | chrX   | 0.755180 | 0.000004 |
| R05D8.10   | dhs-15    | chrV   | 0.754372 | 0.002395 |
| W03D8.5    | W03D8.5   | chrI   | 0.754352 | 0.008343 |
| D2062.7    | D2062.7   | chrII  | 0.754300 | 0.000328 |
| B0554.5    | B0554.5   | chrV   | 0.753615 | 0.000024 |
| K08D10.9   | K08D10.9  | chrIV  | 0.753487 | 0.017977 |
| C29F3.6    | srx-58    | chrV   | 0.753275 | 0.048191 |
| F33A8.10   | F33A8.10  | chrII  | 0.752042 | 0.016843 |
| D1081.12   | D1081.12  | chrI   | 0.751690 | 0.010571 |
| T16A9.3    | T16A9.3   | chrV   | 0.751335 | 0.000000 |
| Y38E10A.26 | nspe-2    | chrII  | 0.751131 | 0.015248 |
| B0563.8    | B0563.8   | chrX   | 0.750212 | 0.020149 |
| F36A4.2    | F36A4.2   | chrIV  | 0.750198 | 0.024810 |
| Y53C10A.2  | Y53C10A.2 | chrI   | 0.749548 | 0.000003 |
| K09A11.2   | cyp-14A1  | chrX   | 0.749266 | 0.000009 |
| K02E11.10  | K02E11.10 | chrV   | 0.748922 | 0.000000 |
| T20C7.2    | nhr-284   | chrV   | 0.747994 | 0.000076 |
| Y119D3B.9  | fbxa-21   | chrIII | 0.747418 | 0.010737 |
| ZK6.7      | lipl-5    | chrV   | 0.746749 | 0.000000 |
| Y65B4BL.6  | Y65B4BL.6 | chrI   | 0.746652 | 0.006940 |
| T02B11.6   | T02B11.6  | chrV   | 0.746275 | 0.029869 |
| C54C6.5    | C54C6.5   | chrIII | 0.745879 | 0.003960 |
| Y49F6B.10  | col-71    | chrII  | 0.745656 | 0.000000 |
| B0034.1    | B0034.1   | chrII  | 0.743722 | 0.000020 |
| K03B4.2    | K03B4.2   | chrV   | 0.743613 | 0.000000 |
| T06E4.10   | T06E4.10  | chrV   | 0.743469 | 0.035900 |
| C30H6.5    | C30H6.5   | chrIV  | 0.742943 | 0.000117 |
| R90.3      | ttr-28    | chrV   | 0.742486 | 0.015248 |
| Y22D7AL.6  | Y22D7AL.6 | chrIII | 0.742396 | 0.019530 |
| C47E8.3    | C47E8.3   | chrV   | 0.741689 | 0.003811 |
| F20G2.1    | F20G2.1   | chrV   | 0.741141 | 0.000066 |
| C25H3.18   | C25H3.18  | chrII  | 0.740868 | 0.000018 |
| F29B9.5    | F29B9.5   | chrIV  | 0.740080 | 0.002987 |
| F46A8.11   | F46A8.11  | chrI   | 0.739881 | 0.001716 |
| T07F10.5   | T07F10.5  | chrV   | 0.739468 | 0.006354 |
| F08G5.4    | col-130   | chrIV  | 0.739016 | 0.000000 |
| F46A8.1    | F46A8.1   | chrI   | 0.738950 | 0.026314 |
| F58G4.6    | str-146   | chrV   | 0.738096 | 0.045122 |
| C50B6.4    | col-161   | chrV   | 0.737969 | 0.000000 |
| C15B12.5   | gar-1     | chrX   | 0.737820 | 0.000348 |
| F54C1.9    | sst-20    | chrI   | 0.737786 | 0.003787 |
| F42F12.1   | nspc-9    | chrX   | 0.737443 | 0.000000 |
| ZK84.3     | ins-5     | chrII  | 0.737143 | 0.000475 |
| Y54G2A.16  | Y54G2A.16 | chrIV  | 0.737064 | 0.000745 |
| C15B12.8   | C15B12.8  | chrX   | 0.737035 | 0.000752 |
| T26C12.4   | gcy-23    | chrIV  | 0.736796 | 0.000937 |
| C34D4.11   | grsp-3    | chrIV  | 0.735283 | 0.000638 |
| F26C11.1   | F26C11.1  | chrII  | 0.734384 | 0.000013 |
| C46C2.3    | C46C2.3   | chrIV  | 0.734171 | 0.002808 |
| K11H12.12  | K11H12.12 | chrIV  | 0.734057 | 0.017751 |
| T05A1.5    | T05A1.5   | chrIV  | 0.732121 | 0.004956 |
| C12D5.9    | C12D5.9   | chrV   | 0.731725 | 0.000019 |

|            |            |        |          |          |
|------------|------------|--------|----------|----------|
| F40G9.2    | F40G9.2    | chrIII | 0.730881 | 0.000000 |
| B0047.1    | bath-20    | chrII  | 0.730807 | 0.000579 |
| ZC334.2    | ins-30     | chrI   | 0.730592 | 0.000074 |
| R10E8.3    | R10E8.3    | chrV   | 0.730153 | 0.000285 |
| ZK525.1    | flp-15     | chrIII | 0.729713 | 0.000000 |
| B0511.4    | tag-344    | chrI   | 0.729227 | 0.028200 |
| Y50D4B.2   | Y50D4B.2   | chrV   | 0.728884 | 0.000001 |
| Y1A5A.1    | Y1A5A.1    | chrIII | 0.728477 | 0.029414 |
| B0334.13   | B0334.13   | chrII  | 0.728476 | 0.019530 |
| F31E9.1    | F31E9.1    | chrV   | 0.727549 | 0.000006 |
| T08B1.3    | alh-5      | chrV   | 0.727019 | 0.000000 |
| T07F12.3   | arrd-23    | chrX   | 0.726942 | 0.011962 |
| T20G5.8    | T20G5.8    | chrIII | 0.726940 | 0.000000 |
| F40H3.6    | F40H3.6    | chrII  | 0.725403 | 0.000000 |
| R13A1.5    | R13A1.5    | chrIV  | 0.725031 | 0.001363 |
| F38B2.6    | F38B2.6    | chrX   | 0.724948 | 0.000018 |
| K05F1.1    | K05F1.1    | chrII  | 0.724167 | 0.000014 |
| F23H12.10  | F23H12.10  | chrV   | 0.723694 | 0.004016 |
| F22G12.3   | F22G12.3   | chrI   | 0.723643 | 0.018763 |
| T08B6.9    | T08B6.9    | chrIV  | 0.723215 | 0.002429 |
| C34D4.15   | col-113    | chrIV  | 0.722924 | 0.000000 |
| F09C8.1    | F09C8.1    | chrX   | 0.722649 | 0.000000 |
| M195.1     | col-77     | chrII  | 0.721765 | 0.000000 |
| F30B5.1    | dpy-13     | chrIV  | 0.721710 | 0.000000 |
| F11E6.6    | F11E6.6    | chrIV  | 0.721633 | 0.010190 |
| C44B11.4   | C44B11.4   | chrIII | 0.721556 | 0.000130 |
| H23N18.5   | H23N18.5   | chrV   | 0.720743 | 0.000003 |
| Y48A6B.1   | Y48A6B.1   | chrIII | 0.720672 | 0.023074 |
| F16H11.4   | ceh-1      | chrX   | 0.720540 | 0.049966 |
| T05B4.3    | phat-4     | chrV   | 0.720465 | 0.000000 |
| T20G5.7    | dod-6      | chrIII | 0.720420 | 0.000000 |
| W09H1.4    | W09H1.4    | chrII  | 0.720403 | 0.000988 |
| Y38H6C.15  | Y38H6C.15  | chrV   | 0.720292 | 0.037675 |
| F27C1.8    | dpy-5      | chrI   | 0.719597 | 0.000000 |
| F22E5.8    | F22E5.8    | chrII  | 0.718804 | 0.004422 |
| F16B4.5    | F16B4.5    | chrV   | 0.718737 | 0.000609 |
| Y24F12A.4  | Y24F12A.4  | chrIV  | 0.718687 | 0.000001 |
| Y6B3B.10   | lagr-1     | chrI   | 0.718554 | 0.000016 |
| R09A1.5    | R09A1.5    | chrV   | 0.718349 | 0.000002 |
| Y105E8A.13 | Y105E8A.13 | chrI   | 0.718170 | 0.000888 |
| AH6.3      | AH6.3      | chrII  | 0.717028 | 0.015808 |
| Y27F2A.6   | Y27F2A.6   | chrII  | 0.716883 | 0.010296 |
| F42F12.7   | nspc-14    | chrX   | 0.716430 | 0.000000 |
| F54F3.3    | lipI-1     | chrV   | 0.715057 | 0.000027 |
| F13D11.3   | F13D11.3   | chrX   | 0.714892 | 0.000000 |
| F35B12.8   | glb-15     | chrV   | 0.714460 | 0.037675 |
| M195.2     | M195.2     | chrII  | 0.714406 | 0.013262 |
| T08A9.12   | spp-2      | chrX   | 0.714389 | 0.000000 |
| T28A11.2   | T28A11.2   | chrV   | 0.714183 | 0.000001 |
| F41E7.3    | F41E7.3    | chrX   | 0.713220 | 0.015199 |
| R01B10.3   | R01B10.3   | chrV   | 0.712900 | 0.000000 |
| B0379.7    | B0379.7    | chrI   | 0.712849 | 0.000032 |
| C04G2.2    | C04G2.2    | chrIV  | 0.712440 | 0.001496 |
| C28C12.4   | C28C12.4   | chrIV  | 0.712136 | 0.000002 |
| T27C10.8   | T27C10.8   | chrI   | 0.712059 | 0.012897 |
| ZC373.6    | dao-4      | chrX   | 0.711403 | 0.000223 |
| F19B2.12   | F19B2.12   | chrV   | 0.710863 | 0.000000 |
| ZK858.2    | ZK858.2    | chrI   | 0.710827 | 0.000000 |
| F57H12.3   | ora-1      | chrIV  | 0.708310 | 0.000076 |
| W02C12.2   | W02C12.2   | chrIV  | 0.707148 | 0.000031 |
| R09E10.1   | R09E10.1   | chrIV  | 0.707136 | 0.020550 |
| Y59E9AL.6  | Y59E9AL.6  | chrIV  | 0.706154 | 0.000000 |
| F44D12.8   | F44D12.8   | chrIV  | 0.706118 | 0.006023 |

|            |            |        |          |          |
|------------|------------|--------|----------|----------|
| F19F10.3   | F19F10.3   | chrV   | 0.705944 | 0.000004 |
| MTCE.7     | MTCE.7     | chrM   | 0.705586 | 0.000000 |
| K01D12.14  | cdr-5      | chrV   | 0.704947 | 0.040662 |
| ZK593.3    | ZK593.3    | chrIV  | 0.704922 | 0.000000 |
| Y39B6A.9   | Y39B6A.9   | chrV   | 0.704645 | 0.019530 |
| Y71G12B.27 | Y71G12B.27 | chrI   | 0.703991 | 0.003436 |
| Y71H9A.2   | sto-6      | chrX   | 0.703779 | 0.008060 |
| F16H6.2    | clec-246   | chrV   | 0.703688 | 0.011162 |
| Y40H4A.2   | Y40H4A.2   | chrV   | 0.701921 | 0.036647 |
| C46A5.3    | col-14     | chrIV  | 0.701797 | 0.000000 |
| F25E5.2    | F25E5.2    | chrV   | 0.701609 | 0.002440 |
| F25E5.16   | F25E5.16   | chrV   | 0.700484 | 0.007268 |
| C08G5.5    | C08G5.5    | chrII  | 0.700113 | 0.000473 |
| C35E7.9    | C35E7.9    | chrI   | 0.700023 | 0.048175 |
| D1086.19   | D1086.19   | chrV   | 0.699455 | 0.003198 |
| F47C10.2   | btb-21     | chrV   | 0.699265 | 0.002388 |
| R07C12.2   | R07C12.2   | chrIV  | 0.699199 | 0.000000 |
| F01D5.1    | F01D5.1    | chrII  | 0.698480 | 0.000000 |
| C49C3.2    | C49C3.2    | chrIV  | 0.698162 | 0.003729 |
| Y105C5B.18 | Y105C5B.18 | chrIV  | 0.697876 | 0.015550 |
| H35N03.1   | exp-1      | chrII  | 0.697737 | 0.012829 |
| E03A3.4    | his-70     | chrIII | 0.697597 | 0.026274 |
| F58A6.4    | nas-29     | chrII  | 0.696054 | 0.034334 |
| Y41E3.2    | dpy-4      | chrIV  | 0.695931 | 0.000000 |
| T02D1.6    | T02D1.6    | chrIV  | 0.694809 | 0.019576 |
| Y39A3CR.5  | Y39A3CR.5  | chrIII | 0.694271 | 0.003845 |
| Y73F4A.3   | Y73F4A.3   | chrIV  | 0.694052 | 0.000132 |
| F58G6.9    | F58G6.9    | chrIV  | 0.693563 | 0.000000 |
| T27E4.7    | T27E4.7    | chrV   | 0.693197 | 0.000000 |
| D2096.6    | D2096.6    | chrIV  | 0.692759 | 0.000010 |
| Y54G11A.17 | Y54G11A.17 | chrII  | 0.691009 | 0.000021 |
| C06A8.6    | C06A8.6    | chrII  | 0.690907 | 0.000158 |
| R09H10.2   | R09H10.2   | chrIV  | 0.690904 | 0.002303 |
| Y73B6BL.35 | Y73B6BL.35 | chrIV  | 0.690535 | 0.000002 |
| Y51H7C.13  | Y51H7C.13  | chrII  | 0.690227 | 0.000000 |
| F13G3.1    | ztf-2      | chrI   | 0.689784 | 0.000669 |
| T02E1.7    | T02E1.7    | chrI   | 0.689066 | 0.020996 |
| F59A6.2    | F59A6.2    | chrII  | 0.688264 | 0.026165 |
| F41G3.21   | F41G3.21   | chrII  | 0.687796 | 0.000000 |
| K07A12.8   | K07A12.8   | chrI   | 0.686705 | 0.001851 |
| Y75B12B.3  | Y75B12B.3  | chrV   | 0.686643 | 0.002074 |
| C24D10.7   | nspd-3     | chrIV  | 0.685773 | 0.000988 |
| Y47G6A.15  | Y47G6A.15  | chrI   | 0.685227 | 0.000000 |
| Y71A12B.10 | Y71A12B.10 | chrI   | 0.685183 | 0.004127 |
| F54C9.14   | F54C9.14   | chrII  | 0.683528 | 0.002359 |
| F31E9.3    | F31E9.3    | chrV   | 0.683514 | 0.022116 |
| K08C9.4    | col-65     | chrI   | 0.682651 | 0.000000 |
| W07E11.3   | flp-2      | chrX   | 0.682395 | 0.000003 |
| F41C6.5    | col-173    | chrX   | 0.682067 | 0.000550 |
| F35A5.2    | F35A5.2    | chrX   | 0.681905 | 0.000033 |
| F11G11.12  | col-73     | chrII  | 0.681890 | 0.000000 |
| C03B8.3    | C03B8.3    | chrIII | 0.681407 | 0.023822 |
| B0432.8    | B0432.8    | chrII  | 0.681401 | 0.000172 |
| F27C1.3    | F27C1.3    | chrI   | 0.681144 | 0.042613 |
| Y87G2A.19  | Y87G2A.19  | chrI   | 0.681095 | 0.000000 |
| R06F6.11   | tag-209    | chrII  | 0.680918 | 0.000000 |
| D1086.5    | D1086.5    | chrV   | 0.680610 | 0.000158 |
| F28H7.4    | F28H7.4    | chrV   | 0.679428 | 0.029615 |
| Y71H2AM.22 | twk-45     | chrIII | 0.679168 | 0.003611 |
| K11D12.1   | cwp-4      | chrV   | 0.679119 | 0.008472 |
| F58D2.4    | F58D2.4    | chrIV  | 0.677711 | 0.026848 |
| C14C6.2    | C14C6.2    | chrV   | 0.677560 | 0.000000 |
| ZK337.5    | mtt-1      | chrI   | 0.677156 | 0.000758 |

|            |            |        |          |          |
|------------|------------|--------|----------|----------|
| Y39A3CL.3  | Y39A3CL.3  | chrIII | 0.676871 | 0.000000 |
| K08D10.10  | K08D10.10  | chrIV  | 0.676743 | 0.000040 |
| R11D1.12   | R11D1.12   | chrV   | 0.676693 | 0.016547 |
| B0244.5    | B0244.5    | chrIII | 0.676592 | 0.041877 |
| C01F1.4    | C01F1.4    | chrII  | 0.676270 | 0.009458 |
| C01C4.1    | nlp-1      | chrX   | 0.676248 | 0.000001 |
| C27D8.1    | C27D8.1    | chrIV  | 0.676026 | 0.000053 |
| F59C6.6    | nlp-4      | chrI   | 0.675977 | 0.009255 |
| F46C5.4    | F46C5.4    | chrII  | 0.675767 | 0.049709 |
| T04F3.2    | T04F3.2    | chrV   | 0.675269 | 0.000416 |
| F11C7.2    | F11C7.2    | chrX   | 0.674619 | 0.000077 |
| R03C1.1    | R03C1.1    | chrII  | 0.674156 | 0.001370 |
| C07A4.3    | C07A4.3    | chrX   | 0.674063 | 0.010296 |
| Y48G10A.6  | Y48G10A.6  | chrI   | 0.674024 | 0.000262 |
| C26F1.10   | flp-21     | chrV   | 0.673388 | 0.000100 |
| T09B9.2    | T09B9.2    | chrX   | 0.673066 | 0.048772 |
| T03F1.11   | T03F1.11   | chrI   | 0.672639 | 0.000000 |
| Y105E8A.27 | Y105E8A.27 | chrI   | 0.672462 | 0.011495 |
| F42G9.4    | F42G9.4    | chrIII | 0.672347 | 0.017116 |
| T19D12.9   | T19D12.9   | chrII  | 0.671406 | 0.039750 |
| C03G5.2    | nspc-7     | chrX   | 0.670525 | 0.000118 |
| D2024.7    | gstk-2     | chrIV  | 0.669148 | 0.000000 |
| F09F3.6    | ttr-21     | chrV   | 0.668830 | 0.000000 |
| T07D10.6   | flp-33     | chrI   | 0.668681 | 0.000001 |
| Y38H6C.19  | Y38H6C.19  | chrV   | 0.668595 | 0.000004 |
| F23C8.1    | F23C8.1    | chrI   | 0.668407 | 0.048599 |
| C40C9.3    | C40C9.3    | chrX   | 0.667646 | 0.037368 |
| T09A5.3    | acr-7      | chrII  | 0.667534 | 0.031562 |
| C04E6.13   | C04E6.13   | chrV   | 0.666279 | 0.000157 |
| F56D6.13   | F56D6.13   | chrIV  | 0.665180 | 0.023589 |
| T27A3.5    | T27A3.5    | chrI   | 0.665170 | 0.000971 |
| H04D03.3   | H04D03.3   | chrIII | 0.665136 | 0.008777 |
| C36A4.3    | cyp-25A3   | chrIII | 0.664760 | 0.000000 |
| C16A3.11   | C16A3.11   | chrIII | 0.664177 | 0.002454 |
| C41H7.1    | C41H7.1    | chrII  | 0.663513 | 0.040654 |
| ZK265.2    | col-63     | chrI   | 0.663383 | 0.000000 |
| C40A11.8   | C40A11.8   | chrII  | 0.662898 | 0.011962 |
| F35B12.2   | dhs-20     | chrV   | 0.662884 | 0.000004 |
| F35B12.6   | tag-290    | chrV   | 0.662574 | 0.000000 |
| C02E7.7    | C02E7.7    | chrV   | 0.662092 | 0.000000 |
| M18.2      | dlc-2      | chrIV  | 0.661758 | 0.000000 |
| C01B12.9   | C01B12.9   | chrII  | 0.661314 | 0.000023 |
| C33A12.2   | nlp-35     | chrIV  | 0.661242 | 0.000441 |
| M01H9.1    | trx-3      | chrIV  | 0.661139 | 0.000257 |
| F21E9.3    | ttr-37     | chrX   | 0.660966 | 0.000000 |
| F41G4.1    | F41G4.1    | chrX   | 0.660796 | 0.000212 |
| F57G9.6    | F57G9.6    | chrII  | 0.660770 | 0.014113 |
| F07C6.3    | F07C6.3    | chrIV  | 0.660725 | 0.000000 |
| E04D5.5    | E04D5.5    | chrII  | 0.660631 | 0.000001 |
| C50E10.1   | C50E10.1   | chrII  | 0.660533 | 0.000500 |
| F41F3.3    | F41F3.3    | chrV   | 0.660511 | 0.000000 |
| F49E11.11  | scl-3      | chrIV  | 0.660479 | 0.000000 |
| C31H5.5    | C31H5.5    | chrI   | 0.660384 | 0.000006 |
| F26G1.5    | F26G1.5    | chrII  | 0.660179 | 0.000002 |
| ZC47.3     | fbxa-29    | chrIII | 0.659911 | 0.001062 |
| Y47D7A.13  | Y47D7A.13  | chrV   | 0.659689 | 0.000000 |
| F27E5.7    | F27E5.7    | chrII  | 0.659372 | 0.000007 |
| ZC239.7    | gcy-15     | chrII  | 0.659125 | 0.004650 |
| F59A7.5    | F59A7.5    | chrV   | 0.658312 | 0.000005 |
| Y54F10AM.6 | Y54F10AM.6 | chrIII | 0.657930 | 0.000110 |
| Y67H2A.9   | Y67H2A.9   | chrIV  | 0.656901 | 0.000000 |
| C42D4.3    | C42D4.3    | chrIV  | 0.656363 | 0.000010 |
| F55G11.4   | F55G11.4   | chrIV  | 0.656211 | 0.000000 |

|            |            |        |          |          |
|------------|------------|--------|----------|----------|
| F26A3.4    | F26A3.4    | chrI   | 0.655765 | 0.000000 |
| C34F11.8   | C34F11.8   | chrII  | 0.655727 | 0.000001 |
| F57B7.3    | col-156    | chrV   | 0.655568 | 0.000000 |
| 4R79.2     | 4R79.2     | chrIV  | 0.655342 | 0.013798 |
| W01B6.3    | W01B6.3    | chrIV  | 0.655120 | 0.032961 |
| R90.4      | ttr-29     | chrV   | 0.654908 | 0.012134 |
| T04C12.3   | T04C12.3   | chrV   | 0.654467 | 0.000000 |
| C33G8.3    | C33G8.3    | chrV   | 0.654183 | 0.000213 |
| C03G6.3    | srj-14     | chrV   | 0.654156 | 0.000001 |
| F10G2.3    | clec-7     | chrV   | 0.654016 | 0.000000 |
| Y37D8A.15  | flp-14     | chrIII | 0.653646 | 0.000000 |
| Y73F8A.31  | Y73F8A.31  | chrIV  | 0.653043 | 0.008091 |
| ZK669.3    | ZK669.3    | chrII  | 0.652432 | 0.000000 |
| C08F8.7    | rap-3      | chrIV  | 0.652267 | 0.003878 |
| C34D4.3    | C34D4.3    | chrIV  | 0.652183 | 0.000733 |
| K03E5.1    | K03E5.1    | chrI   | 0.651966 | 0.013720 |
| F41G4.3    | sto-5      | chrX   | 0.651378 | 0.000000 |
| Y47D3B.6   | Y47D3B.6   | chrIII | 0.651302 | 0.000003 |
| Y55D5A.4   | Y55D5A.4   | chrIII | 0.651151 | 0.001650 |
| F11C7.3    | vap-1      | chrX   | 0.651132 | 0.000002 |
| R173.4     | flp-26     | chrX   | 0.651040 | 0.000030 |
| M04F3.2    | M04F3.2    | chrI   | 0.650713 | 0.000266 |
| W03C9.5    | W03C9.5    | chrII  | 0.650654 | 0.000000 |
| C24F3.3    | nas-12     | chrIV  | 0.650292 | 0.038755 |
| C15H11.2   | gnrr-2     | chrV   | 0.650271 | 0.000000 |
| C03G5.8    | nspc-1     | chrX   | 0.650103 | 0.000556 |
| M117.6     | M117.6     | chrIV  | 0.649921 | 0.000065 |
| D1054.18   | D1054.18   | chrV   | 0.649897 | 0.000001 |
| ZK218.1    | ZK218.1    | chrV   | 0.648677 | 0.001090 |
| F32A6.5    | sto-2      | chrX   | 0.648141 | 0.013722 |
| Y9D1A.1    | Y9D1A.1    | chrII  | 0.647941 | 0.000002 |
| Y116F11A.4 | Y116F11A.4 | chrV   | 0.647768 | 0.007594 |
| Y2H9A.3    | col-162    | chrV   | 0.647411 | 0.000000 |
| T26E3.11   | T26E3.11   | chrI   | 0.646893 | 0.008448 |
| C49G7.3    | C49G7.3    | chrV   | 0.646842 | 0.000000 |
| W03G11.2   | W03G11.2   | chrX   | 0.645732 | 0.002255 |
| Y119D3B.13 | Y119D3B.13 | chrIII | 0.645419 | 0.000000 |
| Y51H4A.9   | col-137    | chrIV  | 0.645234 | 0.000000 |
| W07E11.4   | flp-28     | chrX   | 0.645131 | 0.000000 |
| C49C8.3    | C49C8.3    | chrIV  | 0.644396 | 0.000000 |
| F59E12.4   | npl-4.1    | chrII  | 0.643477 | 0.000000 |
| T14A8.2    | T14A8.2    | chrIV  | 0.643450 | 0.000166 |
| C34F11.4   | msh-50     | chrII  | 0.643080 | 0.001305 |
| Y53F4B.19  | Y53F4B.19  | chrII  | 0.642163 | 0.001481 |
| M02E1.2    | M02E1.2    | chrX   | 0.642139 | 0.003169 |
| F35E2.5    | F35E2.5    | chrI   | 0.641339 | 0.043213 |
| C43F9.5    | C43F9.5    | chrIV  | 0.641142 | 0.019693 |
| F56F3.6    | ins-17     | chrIII | 0.641086 | 0.000001 |
| F09E10.7   | F09E10.7   | chrX   | 0.640850 | 0.000044 |
| Y76B12C.4  | Y76B12C.4  | chrIV  | 0.640567 | 0.000250 |
| K10D11.3   | K10D11.3   | chrIV  | 0.640489 | 0.010304 |
| R07C3.13   | R07C3.13   | chrII  | 0.639824 | 0.029386 |
| F54F12.2   | F54F12.2   | chrIII | 0.639680 | 0.008397 |
| W03F8.2    | W03F8.2    | chrIV  | 0.639634 | 0.003299 |
| D2062.6    | D2062.6    | chrII  | 0.638850 | 0.014220 |
| Y58G8A.5   | Y58G8A.5   | chrV   | 0.638795 | 0.007111 |
| C25D7.15   | C25D7.15   | chrV   | 0.638705 | 0.016268 |
| F30A10.15  | F30A10.15  | chrI   | 0.638097 | 0.009933 |
| T10B10.6   | phat-6     | chrX   | 0.637554 | 0.000000 |
| C05E11.8   | flp-12     | chrX   | 0.637518 | 0.000000 |
| F14H12.7   | F14H12.7   | chrX   | 0.637435 | 0.002977 |
| Y45F10C.2  | Y45F10C.2  | chrIV  | 0.637111 | 0.000201 |
| C26C6.3    | nas-36     | chrI   | 0.636512 | 0.000208 |



|            |            |        |          |          |
|------------|------------|--------|----------|----------|
| F48B9.4    | nlp-37     | chrX   | 0.636370 | 0.000001 |
| Y39A1C.1   | Y39A1C.1   | chrIII | 0.636320 | 0.000001 |
| C45E5.4    | C45E5.4    | chrIV  | 0.635912 | 0.000000 |
| F23B2.5    | flp-1      | chrIV  | 0.635598 | 0.000000 |
| Y49E10.26  | Y49E10.26  | chrIII | 0.635306 | 0.000001 |
| F46C5.10   | F46C5.10   | chrII  | 0.635301 | 0.000000 |
| F11E6.11   | F11E6.11   | chrIV  | 0.635186 | 0.016301 |
| F53G12.4   | F53G12.4   | chrI   | 0.634832 | 0.006805 |
| H10E21.4   | H10E21.4   | chrIII | 0.634176 | 0.000003 |
| Y43C5A.3   | Y43C5A.3   | chrIV  | 0.633548 | 0.000000 |
| F32B6.4    | F32B6.4    | chrIV  | 0.633363 | 0.001025 |
| T11B7.5    | T11B7.5    | chrIV  | 0.633030 | 0.000000 |
| C46E10.1   | C46E10.1   | chrII  | 0.632603 | 0.013680 |
| T07E3.6    | pdf-1      | chrIII | 0.632573 | 0.000000 |
| F26G1.11   | F26G1.11   | chrII  | 0.632565 | 0.038782 |
| H17B01.2   | col-70     | chrII  | 0.632474 | 0.030233 |
| C49F5.9    | C49F5.9    | chrX   | 0.632078 | 0.000001 |
| C06B3.6    | C06B3.6    | chrV   | 0.631878 | 0.000000 |
| F32A5.4    | F32A5.4    | chrII  | 0.631871 | 0.000000 |
| K08F4.11   | gst-3      | chrIV  | 0.631540 | 0.001865 |
| Y1H11.2    | gst-35     | chrII  | 0.631466 | 0.000002 |
| F44G4.6    | F44G4.6    | chrII  | 0.631271 | 0.037386 |
| W02A11.8   | bath-35    | chrI   | 0.630931 | 0.000019 |
| C27A12.4   | C27A12.4   | chrI   | 0.630867 | 0.035599 |
| C50F2.7    | C50F2.7    | chrI   | 0.630479 | 0.001375 |
| F28F8.10   | F28F8.10   | chrV   | 0.630425 | 0.000069 |
| F33A8.2    | nlp-18     | chrII  | 0.630286 | 0.000000 |
| F56C4.3    | glb-19     | chrIV  | 0.629960 | 0.001108 |
| F41B5.4    | cyp-33C3   | chrV   | 0.629833 | 0.000184 |
| T22B11.3   | T22B11.3   | chrIV  | 0.629602 | 0.001573 |
| C33G8.2    | C33G8.2    | chrV   | 0.629510 | 0.000000 |
| Y105E8A.36 | Y105E8A.36 | chrI   | 0.629477 | 0.000000 |
| C01B12.8   | C01B12.8   | chrII  | 0.629216 | 0.000000 |
| B0280.2    | B0280.2    | chrIII | 0.628997 | 0.038577 |
| Y51F10.7   | Y51F10.7   | chrI   | 0.628815 | 0.000000 |
| Y17G7B.6   | glb-29     | chrII  | 0.628618 | 0.030892 |
| B0212.1    | otpl-1     | chrIV  | 0.628577 | 0.012399 |
| F45C12.2   | F45C12.2   | chrII  | 0.628424 | 0.002286 |
| R04F11.1   | R04F11.1   | chrV   | 0.628392 | 0.043375 |
| F54D5.3    | F54D5.3    | chrII  | 0.628272 | 0.000000 |
| T28B4.4    | T28B4.4    | chrX   | 0.627462 | 0.004451 |
| C25F9.10   | C25F9.10   | chrV   | 0.627103 | 0.010214 |
| Y37E11AL.2 | Y37E11AL.2 | chrIV  | 0.626754 | 0.002512 |
| T05E11.2   | T05E11.2   | chrIV  | 0.626583 | 0.001491 |
| R06B10.5   | tbc-10     | chrIII | 0.626068 | 0.002083 |
| F08F1.4    | F08F1.4    | chrX   | 0.625253 | 0.000035 |
| Y47H9C.1   | Y47H9C.1   | chrI   | 0.624630 | 0.000240 |
| T09A5.1    | cex-2      | chrII  | 0.624596 | 0.000000 |
| VK10D6R.1  | cnc-10     | chrV   | 0.624397 | 0.000000 |
| F45E4.8    | nlp-20     | chrIV  | 0.624358 | 0.000000 |
| MTCE.3     | MTCE.3     | chrM   | 0.624318 | 0.000000 |
| F36H12.1   | nlp-47     | chrIV  | 0.623868 | 0.000000 |
| F35H10.3   | F35H10.3   | chrIV  | 0.623850 | 0.008836 |
| C27C7.7    | C27C7.7    | chrI   | 0.623809 | 0.017759 |
| C05D11.5   | C05D11.5   | chrIII | 0.623516 | 0.000000 |
| M04B2.7    | M04B2.7    | chrIV  | 0.623398 | 0.003299 |
| D2096.9    | D2096.9    | chrIV  | 0.623295 | 0.029687 |
| C25H3.5    | flp-27     | chrII  | 0.622965 | 0.000006 |
| Y51H4A.25  | Y51H4A.25  | chrIV  | 0.622582 | 0.001665 |
| F09E8.8    | F09E8.8    | chrIV  | 0.621810 | 0.004650 |
| C05D9.9    | C05D9.9    | chrX   | 0.621166 | 0.000000 |
| B0563.5    | B0563.5    | chrX   | 0.620640 | 0.046866 |
| T04A6.5    | T04A6.5    | chrIII | 0.620402 | 0.000007 |

|            |            |        |          |          |
|------------|------------|--------|----------|----------|
| ZK6.3      | scl-27     | chrV   | 0.620363 | 0.035900 |
| T28D6.3    | T28D6.3    | chrIII | 0.620046 | 0.000000 |
| C09F12.2   | C09F12.2   | chrX   | 0.619644 | 0.025055 |
| F27B10.1   | F27B10.1   | chrV   | 0.618997 | 0.000385 |
| C05D12.5   | C05D12.5   | chrII  | 0.618280 | 0.000003 |
| Y38E10A.11 | nspe-4     | chrII  | 0.618216 | 0.026907 |
| C36C5.12   | C36C5.12   | chrV   | 0.618180 | 0.011590 |
| Y12A6A.2   | Y12A6A.2   | chrX   | 0.618162 | 0.033421 |
| B0025.5    | B0025.5    | chrI   | 0.618146 | 0.001456 |
| ZK1320.2   | ZK1320.2   | chrII  | 0.617870 | 0.000000 |
| C53A3.1    | C53A3.1    | chrV   | 0.617470 | 0.001328 |
| K07B1.8    | K07B1.8    | chrV   | 0.617313 | 0.000000 |
| K01D12.9   | K01D12.9   | chrV   | 0.616655 | 0.000019 |
| F41E6.11   | F41E6.11   | chrV   | 0.616336 | 0.000616 |
| R05D8.7    | R05D8.7    | chrV   | 0.615569 | 0.020329 |
| C16D9.1    | C16D9.1    | chrV   | 0.615234 | 0.002401 |
| ZK384.4    | ZK384.4    | chrV   | 0.614792 | 0.002470 |
| Y94H6A.3   | Y94H6A.3   | chrIV  | 0.614521 | 0.000000 |
| F20D6.6    | F20D6.6    | chrV   | 0.614103 | 0.010482 |
| T14E8.3    | dop-3      | chrX   | 0.613982 | 0.007588 |
| T02B11.4   | T02B11.4   | chrV   | 0.613729 | 0.000000 |
| F36A4.10   | col-34     | chrIV  | 0.612797 | 0.000000 |
| Y22D7AR.10 | Y22D7AR.10 | chrIII | 0.612548 | 0.000000 |
| W02F12.8   | W02F12.8   | chrV   | 0.612510 | 0.015823 |
| F25E5.8    | F25E5.8    | chrV   | 0.611762 | 0.000000 |
| H17B01.5   | H17B01.5   | chrII  | 0.611684 | 0.041852 |
| F43E2.5    | msra-1     | chrII  | 0.611563 | 0.000000 |
| F59C6.16   | F59C6.16   | chrI   | 0.611002 | 0.000028 |
| R02D5.7    | R02D5.7    | chrV   | 0.610810 | 0.010942 |
| T24C2.5    | T24C2.5    | chrX   | 0.610761 | 0.000352 |
| W03G9.3    | W03G9.3    | chrI   | 0.610631 | 0.000723 |
| F56C9.11   | F56C9.11   | chrIII | 0.610534 | 0.000000 |
| B0228.1    | B0228.1    | chrII  | 0.610460 | 0.000000 |
| C04E12.2   | C04E12.2   | chrV   | 0.609933 | 0.000748 |
| C48E7.11   | C48E7.11   | chrI   | 0.609718 | 0.000000 |
| T26C5.4    | T26C5.4    | chrII  | 0.609163 | 0.000844 |
| K08E5.1    | K08E5.1    | chrIII | 0.608874 | 0.000101 |
| Y43F8B.9   | Y43F8B.9   | chrV   | 0.608845 | 0.001430 |
| C38C3.3    | C38C3.3    | chrV   | 0.608809 | 0.028787 |
| Y38H6C.21  | Y38H6C.21  | chrV   | 0.608794 | 0.000240 |
| Y57G7A.2   | Y57G7A.2   | chrII  | 0.608785 | 0.000042 |
| F58B4.3    | F58B4.3    | chrV   | 0.608780 | 0.000068 |
| ZC395.5    | ZC395.5    | chrIII | 0.608712 | 0.000398 |
| C23H5.3    | xbx-4      | chrIV  | 0.608550 | 0.036081 |
| Y41C4A.6   | Y41C4A.6   | chrIII | 0.608367 | 0.000781 |
| Y95B8A.4   | Y95B8A.4   | chrI   | 0.608286 | 0.019556 |
| ZK1127.6   | ZK1127.6   | chrII  | 0.608243 | 0.000000 |
| C17H12.8   | C17H12.8   | chrIV  | 0.607401 | 0.000000 |
| F56D5.4    | F56D5.4    | chrIV  | 0.607079 | 0.000000 |
| ZK1225.4   | ZK1225.4   | chrI   | 0.606939 | 0.013849 |
| F35G2.3    | F35G2.3    | chrIV  | 0.606804 | 0.003500 |
| T20B3.12   | clec-26    | chrV   | 0.606416 | 0.001176 |
| T28B8.2    | ins-18     | chrI   | 0.606321 | 0.004123 |
| F19H6.2    | glb-13     | chrX   | 0.605814 | 0.003363 |
| F41H10.2   | F41H10.2   | chrIV  | 0.605591 | 0.000653 |
| C43G2.3    | C43G2.3    | chrIV  | 0.605146 | 0.018709 |
| R12E2.7    | R12E2.7    | chrI   | 0.604783 | 0.000003 |
| B0035.13   | B0035.13   | chrIV  | 0.604511 | 0.000000 |
| K11D12.8   | K11D12.8   | chrV   | 0.603682 | 0.022522 |
| F49C12.10  | F49C12.10  | chrIV  | 0.603502 | 0.000876 |
| Y39B6A.13  | Y39B6A.13  | chrV   | 0.603263 | 0.000000 |
| F53A9.6    | F53A9.6    | chrX   | 0.602584 | 0.000028 |
| F37H8.7    | F37H8.7    | chrII  | 0.602490 | 0.007046 |

|            |            |        |          |          |
|------------|------------|--------|----------|----------|
| F26A1.10   | nspd-9     | chrIII | 0.602274 | 0.044344 |
| K01A2.2    | far-7      | chrII  | 0.602252 | 0.001115 |
| F45D3.3    | F45D3.3    | chrV   | 0.601965 | 0.000000 |
| M02B7.7    | M02B7.7    | chrIV  | 0.601804 | 0.000001 |
| C11E4.2    | C11E4.2    | chrX   | 0.601801 | 0.000001 |
| F18E3.7    | ddo-2      | chrV   | 0.601629 | 0.000000 |
| T23F6.3    | T23F6.3    | chrIV  | 0.601028 | 0.011416 |
| Y66D12A.11 | Y66D12A.11 | chrIII | 0.600971 | 0.029923 |
| C09G5.3    | col-79     | chrII  | 0.600428 | 0.001306 |
| H16D19.5   | H16D19.5   | chrI   | 0.600427 | 0.004880 |
| B0280.11   | B0280.11   | chrIII | 0.600396 | 0.038755 |
| ZK616.61   | ZK616.61   | chrIV  | 0.600228 | 0.037058 |
| C24A1.1    | flp-24     | chrIII | 0.599667 | 0.000000 |
| Y54G2A.32  | Y54G2A.32  | chrIV  | 0.599566 | 0.000843 |
| F59H6.8    | bath-21    | chrII  | 0.599520 | 0.000033 |
| F32B4.5    | F32B4.5    | chrI   | 0.599206 | 0.020329 |
| C14C11.7   | C14C11.7   | chrV   | 0.598546 | 0.000000 |
| Y17G9A.4   | Y17G9A.4   | chrIV  | 0.598439 | 0.018967 |
| Y38C1BA.3  | col-109    | chrIV  | 0.598290 | 0.000000 |
| M01D7.5    | nlp-12     | chrI   | 0.598255 | 0.000063 |
| F55C10.3   | col-155    | chrV   | 0.598088 | 0.000003 |
| W07E11.2   | flp-3      | chrX   | 0.598072 | 0.000000 |
| Y50D4A.6   | Y50D4A.6   | chrV   | 0.597947 | 0.008710 |
| Y106G6H.16 | Y106G6H.16 | chrI   | 0.597835 | 0.000000 |
| M79.4      | flp-19     | chrX   | 0.597812 | 0.000000 |
| C13G3.1    | C13G3.1    | chrV   | 0.597792 | 0.000001 |
| F56A11.6   | F56A11.6   | chrIV  | 0.597753 | 0.000687 |
| Y57G7A.1   | Y57G7A.1   | chrII  | 0.597343 | 0.000161 |
| F21C10.8   | pqn-31     | chrV   | 0.596747 | 0.000000 |
| R07B1.8    | R07B1.8    | chrX   | 0.596606 | 0.040120 |
| Y38E10A.10 | lips-16    | chrII  | 0.596509 | 0.000058 |
| C18A11.2   | C18A11.2   | chrX   | 0.596509 | 0.035900 |
| Y37H2A.14  | Y37H2A.14  | chrV   | 0.596111 | 0.000346 |
| F37B1.2    | gst-12     | chrII  | 0.596009 | 0.002403 |
| T01D1.6    | abu-11     | chrII  | 0.595962 | 0.000003 |
| C17F3.1    | C17F3.1    | chrI   | 0.595489 | 0.000491 |
| C08F8.4    | mboa-4     | chrIV  | 0.594845 | 0.002592 |
| K11E4.1    | K11E4.1    | chrX   | 0.594730 | 0.006112 |
| C48D1.3    | cho-1      | chrIV  | 0.594590 | 0.004027 |
| Y39A1A.20  | Y39A1A.20  | chrIII | 0.594438 | 0.000000 |
| T12D8.10   | T12D8.10   | chrIII | 0.594187 | 0.000000 |
| ZK622.4    | ZK622.4    | chrII  | 0.594051 | 0.000029 |
| F41B5.1    | F41B5.1    | chrV   | 0.593709 | 0.004335 |
| F13H6.5    | F13H6.5    | chrV   | 0.593478 | 0.017981 |
| F36H5.2    | math-27    | chrII  | 0.593460 | 0.000001 |
| W04B5.2    | W04B5.2    | chrIII | 0.593190 | 0.000064 |
| R03A10.2   | flp-32     | chrX   | 0.592659 | 0.007622 |
| C18H7.4    | C18H7.4    | chrIV  | 0.592575 | 0.027867 |
| B0205.10   | B0205.10   | chrI   | 0.592454 | 0.000060 |
| B0207.12   | avr-14     | chrI   | 0.592140 | 0.000025 |
| C45G9.13   | C45G9.13   | chrIII | 0.592018 | 0.000140 |
| ZK1320.10  | nlp-11     | chrII  | 0.592004 | 0.000000 |
| F52E1.5    | F52E1.5    | chrV   | 0.591971 | 0.000712 |
| T06E4.8    | T06E4.8    | chrV   | 0.591844 | 0.018270 |
| C49F8.3    | C49F8.3    | chrX   | 0.590928 | 0.000015 |
| ZC416.8    | cha-1      | chrIV  | 0.590735 | 0.000004 |
| PDB1.1     | PDB1.1     | chrX   | 0.590692 | 0.000000 |
| F53F4.13   | F53F4.13   | chrV   | 0.590284 | 0.000000 |
| K09A9.8    | K09A9.8    | chrX   | 0.590278 | 0.027941 |
| F14F11.2   | F14F11.2   | chrII  | 0.590183 | 0.000012 |
| C36E6.8    | C36E6.8    | chrX   | 0.589572 | 0.011680 |
| T11F9.9    | col-157    | chrV   | 0.589465 | 0.000143 |
| F53A9.9    | F53A9.9    | chrX   | 0.589393 | 0.000775 |

|            |            |        |          |          |
|------------|------------|--------|----------|----------|
| C49G7.4    | phat-3     | chrV   | 0.589325 | 0.000001 |
| K05F1.9    | K05F1.9    | chrII  | 0.588023 | 0.001411 |
| T04G9.2    | nas-15     | chrX   | 0.587568 | 0.002145 |
| F58B3.3    | lys-6      | chrIV  | 0.587326 | 0.002275 |
| C34E11.4   | C34E11.4   | chrX   | 0.587281 | 0.029923 |
| Y57G11C.46 | Y57G11C.46 | chrIV  | 0.587175 | 0.025093 |
| C13A10.2   | C13A10.2   | chrII  | 0.587120 | 0.019624 |
| F33D4.7    | F33D4.7    | chrIV  | 0.586731 | 0.000000 |
| F23A7.8    | F23A7.8    | chrX   | 0.586472 | 0.000000 |
| F54A3.4    | F54A3.4    | chrII  | 0.586336 | 0.045153 |
| F35B3.4    | F35B3.4    | chrX   | 0.585766 | 0.000138 |
| T09E11.11  | T09E11.11  | chrI   | 0.585406 | 0.003450 |
| H37A05.4   | H37A05.4   | chrV   | 0.585342 | 0.000000 |
| T03D8.7    | T03D8.7    | chrV   | 0.585251 | 0.000283 |
| ZK688.10   | ZK688.10   | chrIII | 0.585031 | 0.021756 |
| F33D4.3    | flp-13     | chrIV  | 0.584761 | 0.000000 |
| M02H5.3    | nhr-201    | chrV   | 0.584438 | 0.000083 |
| C16B8.2    | C16B8.2    | chrX   | 0.584357 | 0.040269 |
| ZC334.9    | ins-28     | chrI   | 0.584122 | 0.005064 |
| K04C2.3    | K04C2.3    | chrIII | 0.583916 | 0.000000 |
| F19G12.4   | F19G12.4   | chrX   | 0.583518 | 0.016382 |
| Y43F8B.11  | Y43F8B.11  | chrV   | 0.583287 | 0.015938 |
| F14D2.11   | F14D2.11   | chrII  | 0.583242 | 0.000005 |
| F27D4.8    | F27D4.8    | chrI   | 0.582628 | 0.000000 |
| C01B10.1   | C01B10.1   | chrIV  | 0.582567 | 0.000000 |
| F54B8.3    | fbxa-69    | chrV   | 0.581704 | 0.000001 |
| F18E3.12   | F18E3.12   | chrV   | 0.581529 | 0.000000 |
| F43G6.10   | F43G6.10   | chrII  | 0.581098 | 0.000000 |
| Y102A5C.34 | Y102A5C.34 | chrV   | 0.581053 | 0.011081 |
| K02E11.3   | K02E11.3   | chrV   | 0.580653 | 0.000204 |
| W07G4.6    | srr-1      | chrV   | 0.580261 | 0.048115 |
| W01D2.1    | W01D2.1    | chrII  | 0.580054 | 0.000000 |
| R05A10.3   | R05A10.3   | chrIV  | 0.579659 | 0.001315 |
| F59F3.4    | F59F3.4    | chrX   | 0.579040 | 0.000257 |
| F35B12.3   | F35B12.3   | chrV   | 0.578595 | 0.000000 |
| C31H2.2    | dpy-8      | chrX   | 0.578555 | 0.000006 |
| C05B5.2    | C05B5.2    | chrIII | 0.578474 | 0.000605 |
| Y37D8A.5   | Y37D8A.5   | chrIII | 0.578379 | 0.035900 |
| F36A4.8    | ttr-20     | chrIV  | 0.578359 | 0.000040 |
| VH15N14R.1 | VH15N14R.1 | chrI   | 0.578201 | 0.003046 |
| ZK1290.3   | rol-8      | chrII  | 0.577786 | 0.000001 |
| F20C5.4    | F20C5.4    | chrIV  | 0.577779 | 0.000002 |
| H06I04.8   | H06I04.8   | chrIII | 0.577576 | 0.010282 |
| H05L03.3   | H05L03.3   | chrX   | 0.577260 | 0.000000 |
| F42F12.2   | zig-2      | chrX   | 0.577241 | 0.000017 |
| Y76A2B.4   | Y76A2B.4   | chrIII | 0.577194 | 0.000000 |
| F55D12.5   | F55D12.5   | chrI   | 0.576641 | 0.000000 |
| Y46C8AL.9  | clcc-75    | chrIV  | 0.576504 | 0.011029 |
| F49E11.10  | scl-2      | chrIV  | 0.576230 | 0.000003 |
| F18G5.4    | lgc-4      | chrX   | 0.575435 | 0.000078 |
| F07F6.2    | F07F6.2    | chrII  | 0.575418 | 0.021756 |
| C01G10.12  | dnj-3      | chrV   | 0.575033 | 0.000000 |
| C50E3.11   | C50E3.11   | chrV   | 0.574218 | 0.000000 |
| F42A9.8    | F42A9.8    | chrIV  | 0.573889 | 0.000000 |
| R07B1.11   | R07B1.11   | chrX   | 0.573554 | 0.012597 |
| Y49E10.18  | Y49E10.18  | chrIII | 0.572552 | 0.000000 |
| W02B12.13  | W02B12.13  | chrII  | 0.572291 | 0.021777 |
| F23C8.8    | F23C8.8    | chrI   | 0.572271 | 0.026967 |
| T06A1.1    | T06A1.1    | chrV   | 0.572041 | 0.014401 |
| F41E7.4    | fip-5      | chrX   | 0.572006 | 0.000003 |
| W05F2.7    | W05F2.7    | chrI   | 0.571822 | 0.001499 |
| F37A4.2    | F37A4.2    | chrIII | 0.571593 | 0.000066 |
| F53F1.6    | F53F1.6    | chrV   | 0.571031 | 0.002983 |

|            |           |        |          |          |
|------------|-----------|--------|----------|----------|
| K10C9.7    | K10C9.7   | chrV   | 0.571002 | 0.024709 |
| C09E7.2    | pqn-10    | chrIII | 0.570995 | 0.048250 |
| T07C4.4    | spp-1     | chrIII | 0.570815 | 0.000000 |
| T05F1.8    | T05F1.8   | chrI   | 0.570657 | 0.049894 |
| Y38C1AA.7  | Y38C1AA.7 | chrIV  | 0.570168 | 0.000000 |
| Y54E10BL.2 | col-48    | chrI   | 0.570134 | 0.000000 |
| Y24F12A.3  | Y24F12A.3 | chrIV  | 0.570126 | 0.037368 |
| M151.4     | M151.4    | chrII  | 0.570119 | 0.000037 |
| K08C9.1    | K08C9.1   | chrI   | 0.569698 | 0.035625 |
| ZC334.1    | ins-26    | chrI   | 0.569668 | 0.001294 |
| F23D12.3   | F23D12.3  | chrX   | 0.569498 | 0.000018 |
| Y48G1C.13  | Y48G1C.13 | chrI   | 0.569479 | 0.000129 |
| F46C8.8    | F46C8.8   | chrX   | 0.569444 | 0.000306 |
| Y43F8C.9   | Y43F8C.9  | chrV   | 0.569257 | 0.005064 |
| F45C12.8   | fbxa-184  | chrII  | 0.569094 | 0.001831 |
| Y42H9B.1   | col-115   | chrIV  | 0.568955 | 0.001003 |
| ZK622.5    | ZK622.5   | chrII  | 0.568675 | 0.000184 |
| F31E9.11   | F31E9.11  | chrV   | 0.568587 | 0.004616 |
| Y51H7BM.1  | math-45   | chrII  | 0.567951 | 0.013242 |
| F22B8.5    | str-7     | chrV   | 0.567905 | 0.000033 |
| M02B7.3    | osm-3     | chrIV  | 0.567876 | 0.000246 |
| Y39G8B.9   | Y39G8B.9  | chrII  | 0.567698 | 0.002271 |
| C08F1.4    | math-3    | chrII  | 0.567182 | 0.000000 |
| B0252.8    | B0252.8   | chrII  | 0.567161 | 0.001392 |
| ZK354.2    | ZK354.2   | chrIV  | 0.566022 | 0.001330 |
| T19D12.2   | T19D12.2  | chrII  | 0.565933 | 0.000000 |
| M04G7.1    | M04G7.1   | chrIV  | 0.565899 | 0.000012 |
| B0513.9    | B0513.9   | chrIV  | 0.565601 | 0.000089 |
| Y105C5B.5  | Y105C5B.5 | chrIV  | 0.565443 | 0.000000 |
| C10G8.4    | C10G8.4   | chrV   | 0.565243 | 0.000000 |
| T28F12.1   | T28F12.1  | chrV   | 0.565123 | 0.000000 |
| Y47D7A.6   | Y47D7A.6  | chrV   | 0.564934 | 0.021969 |
| Y14H12A.1  | Y14H12A.1 | chrII  | 0.564883 | 0.000018 |
| F31F4.7    | ugt-42    | chrV   | 0.564341 | 0.034703 |
| F26D11.12  | F26D11.12 | chrV   | 0.563926 | 0.005290 |
| T22G5.6    | lbp-8     | chrV   | 0.563795 | 0.000122 |
| F14D12.4   | mec-2     | chrX   | 0.562913 | 0.000182 |
| B0222.7    | col-145   | chrV   | 0.562649 | 0.000000 |
| C09B8.8    | C09B8.8   | chrX   | 0.562628 | 0.024709 |
| C48B4.7    | C48B4.7   | chrIII | 0.562506 | 0.000000 |
| F09G8.5    | F09G8.5   | chrIII | 0.562337 | 0.000004 |
| C34B4.3    | C34B4.3   | chrV   | 0.561993 | 0.027940 |
| ZK688.11   | ZK688.11  | chrIII | 0.561825 | 0.000001 |
| Y73B6A.3   | Y73B6A.3  | chrIV  | 0.561697 | 0.037909 |
| C31H1.5    | C31H1.5   | chrIV  | 0.561652 | 0.012134 |
| Y48B6A.16  | Y48B6A.16 | chrII  | 0.561532 | 0.005316 |
| F26F12.8   | F26F12.8  | chrV   | 0.561324 | 0.003525 |
| C27D6.3    | C27D6.3   | chrII  | 0.561013 | 0.001754 |
| K01G5.8    | K01G5.8   | chrIII | 0.560932 | 0.000000 |
| T03F6.6    | T03F6.6   | chrIII | 0.560909 | 0.003055 |
| C02D5.1    | acdh-6    | chrIII | 0.560415 | 0.027940 |
| K04G7.10   | rnp-7     | chrIII | 0.560397 | 0.000000 |
| T21C12.4   | T21C12.4  | chrIII | 0.560299 | 0.012134 |
| C25F9.14   | C25F9.14  | chrV   | 0.560185 | 0.003903 |
| ZK1225.6   | ssp-31    | chrI   | 0.560055 | 0.041538 |
| ZK328.6    | ZK328.6   | chrIII | 0.559882 | 0.000093 |
| F30F8.5    | F30F8.5   | chrI   | 0.559691 | 0.000000 |
| K04H4.7    | flp-25    | chrIII | 0.559632 | 0.004240 |
| C50A2.3    | C50A2.3   | chrIV  | 0.559586 | 0.000000 |
| W09C5.4    | ins-33    | chrI   | 0.558427 | 0.000578 |
| Y46G5A.34  | Y46G5A.34 | chrII  | 0.558318 | 0.000700 |
| F52H2.3    | F52H2.3   | chrX   | 0.558272 | 0.001021 |
| W03D8.3    | W03D8.3   | chrI   | 0.557947 | 0.000000 |

|            |            |        |          |          |
|------------|------------|--------|----------|----------|
| F54D10.2   | fbxa-24    | chrII  | 0.557931 | 0.009476 |
| F59E11.12  | nhr-144    | chrV   | 0.557465 | 0.000066 |
| K09C6.9    | K09C6.9    | chrV   | 0.557364 | 0.000015 |
| C16C4.4    | math-14    | chrII  | 0.557350 | 0.000069 |
| Y44A6D.5   | Y44A6D.5   | chrV   | 0.557135 | 0.024094 |
| F23H12.3   | F23H12.3   | chrV   | 0.557132 | 0.000258 |
| Y75B8A.11  | Y75B8A.11  | chrIII | 0.556971 | 0.003952 |
| F59F5.5    | F59F5.5    | chrX   | 0.556508 | 0.027121 |
| T24D8.5    | nlp-2      | chrX   | 0.556494 | 0.034515 |
| Y53F4B.23  | Y53F4B.23  | chrII  | 0.556363 | 0.000178 |
| F58B3.1    | lys-4      | chrIV  | 0.556266 | 0.000000 |
| M04D8.7    | M04D8.7    | chrIII | 0.556149 | 0.021719 |
| Y5H2B.3    | Y5H2B.3    | chrV   | 0.556088 | 0.000205 |
| ZK1320.13  | ZK1320.13  | chrII  | 0.555939 | 0.000040 |
| R05H5.4    | R05H5.4    | chrII  | 0.555732 | 0.000001 |
| C36B1.14   | C36B1.14   | chrI   | 0.555289 | 0.000000 |
| D2096.13   | D2096.13   | chrIV  | 0.554953 | 0.037442 |
| K11D12.3   | srr-4      | chrV   | 0.554929 | 0.000000 |
| H40L08.3   | H40L08.3   | chrX   | 0.554022 | 0.000627 |
| F07C6.2    | F07C6.2    | chrIV  | 0.553877 | 0.000068 |
| C53B7.7    | C53B7.7    | chrX   | 0.553517 | 0.000273 |
| Y56A3A.3   | mif-1      | chrIII | 0.553158 | 0.000000 |
| C45E5.2    | C45E5.2    | chrIV  | 0.553074 | 0.020996 |
| Y42A5A.5   | Y42A5A.5   | chrV   | 0.552908 | 0.000019 |
| E03D2.2    | nlp-9      | chrV   | 0.552111 | 0.000004 |
| F58G6.3    | F58G6.3    | chrIV  | 0.551954 | 0.000001 |
| F52E1.2    | F52E1.2    | chrV   | 0.551854 | 0.000318 |
| F58E1.13   | F58E1.13   | chrII  | 0.551832 | 0.001871 |
| F49E10.3   | flp-7      | chrX   | 0.551751 | 0.000021 |
| F49C12.14  | F49C12.14  | chrIV  | 0.551564 | 0.000003 |
| C18D1.3    | flp-4      | chrII  | 0.551384 | 0.000134 |
| W04A8.9    | W04A8.9    | chrI   | 0.551118 | 0.022522 |
| C05C12.5   | C05C12.5   | chrIV  | 0.550939 | 0.008485 |
| F22H10.2   | F22H10.2   | chrX   | 0.550717 | 0.000351 |
| T23B5.4    | T23B5.4    | chrIV  | 0.550620 | 0.000000 |
| ZK1010.7   | col-97     | chrIII | 0.549998 | 0.000000 |
| F08G2.6    | ins-37     | chrII  | 0.549584 | 0.021768 |
| F59E11.5   | F59E11.5   | chrV   | 0.548915 | 0.000001 |
| F52E10.4   | F52E10.4   | chrX   | 0.548628 | 0.021520 |
| T21D12.12  | T21D12.12  | chrIV  | 0.548381 | 0.000000 |
| E01G4.7    | E01G4.7    | chrII  | 0.548087 | 0.000000 |
| M02H5.4    | nhr-202    | chrV   | 0.547907 | 0.000000 |
| Y105E8A.11 | Y105E8A.11 | chrI   | 0.547772 | 0.000000 |
| C33F10.1   | C33F10.1   | chrII  | 0.547758 | 0.000134 |
| K02E2.11   | K02E2.11   | chrV   | 0.547526 | 0.004958 |
| T07C12.15  | T07C12.15  | chrV   | 0.547517 | 0.000681 |
| F59D6.3    | F59D6.3    | chrV   | 0.546992 | 0.000193 |
| Y66D12A.6  | Y66D12A.6  | chrIII | 0.546558 | 0.000000 |
| Y102A11A.1 | Y102A11A.1 | chrX   | 0.546331 | 0.033593 |
| Y38C1AA.9  | Y38C1AA.9  | chrIV  | 0.546065 | 0.002196 |
| ZK856.16   | ZK856.16   | chrV   | 0.546038 | 0.000000 |
| F17E9.10   | his-32     | chrIV  | 0.545689 | 0.004405 |
| F53F8.4    | F53F8.4    | chrV   | 0.545607 | 0.000001 |
| R07B1.3    | scav-5     | chrX   | 0.545082 | 0.000013 |
| E04D5.3    | cut-4      | chrII  | 0.544970 | 0.000355 |
| F41C6.4    | F41C6.4    | chrX   | 0.544678 | 0.005640 |
| W09G12.9   | W09G12.9   | chrIV  | 0.544564 | 0.000000 |
| T05A1.3    | T05A1.3    | chrIV  | 0.544167 | 0.002257 |
| Y46H3A.4   | Y46H3A.4   | chrV   | 0.543738 | 0.042818 |
| Y62F5A.12  | Y62F5A.12  | chrII  | 0.542876 | 0.000000 |
| Y77E11A.14 | Y77E11A.14 | chrIV  | 0.542867 | 0.010078 |
| Y59A8B.12  | Y59A8B.12  | chrV   | 0.542838 | 0.000000 |
| Y38E10A.7  | lips-15    | chrII  | 0.542368 | 0.000000 |

|            |            |        |          |          |
|------------|------------|--------|----------|----------|
| F49D11.8   | cpn-4      | chrI   | 0.542124 | 0.000000 |
| T02B11.3   | T02B11.3   | chrV   | 0.541572 | 0.000000 |
| F59A6.12   | F59A6.12   | chrII  | 0.541294 | 0.000126 |
| F09G8.6    | col-91     | chrIII | 0.540793 | 0.000001 |
| F35H10.2   | F35H10.2   | chrIV  | 0.540488 | 0.011994 |
| K02G10.4   | flp-11     | chrX   | 0.540428 | 0.000000 |
| R173.3     | R173.3     | chrX   | 0.540214 | 0.034636 |
| R10D12.13  | R10D12.13  | chrV   | 0.539592 | 0.000000 |
| Y116A8C.29 | Y116A8C.29 | chrIV  | 0.539237 | 0.005684 |
| C54A12.4   | drn-1      | chrII  | 0.539209 | 0.002195 |
| T19C3.3    | T19C3.3    | chrIII | 0.538998 | 0.002030 |
| T12G3.6    | T12G3.6    | chrIV  | 0.538939 | 0.000000 |
| F22E5.9    | F22E5.9    | chrII  | 0.538418 | 0.000000 |
| T03D8.3    | sbt-1      | chrV   | 0.538356 | 0.000000 |
| C37A2.8    | C37A2.8    | chrI   | 0.538271 | 0.000000 |
| Y46C8AL.5  | clec-72    | chrIV  | 0.538223 | 0.003903 |
| Y23H5B.4   | Y23H5B.4   | chrI   | 0.537636 | 0.002970 |
| F22A3.6    | ilys-5     | chrX   | 0.537594 | 0.000000 |
| Y39E4B.14  | Y39E4B.14  | chrIII | 0.537411 | 0.005802 |
| C53C11.2   | C53C11.2   | chrX   | 0.537239 | 0.001184 |
| Y34B4A.5   | Y34B4A.5   | chrX   | 0.536541 | 0.000003 |
| ZC412.10   | ZC412.10   | chrV   | 0.536401 | 0.003078 |
| T17A3.8    | ver-2      | chrIII | 0.536332 | 0.017024 |
| T26C11.9   | T26C11.9   | chrX   | 0.536197 | 0.037623 |
| F10G2.1    | F10G2.1    | chrV   | 0.536006 | 0.000000 |
| D1007.4    | D1007.4    | chrI   | 0.535876 | 0.000000 |
| C04G2.8    | C04G2.8    | chrIV  | 0.535742 | 0.000101 |
| ZK180.5    | ZK180.5    | chrIV  | 0.535603 | 0.000000 |
| Y38H6C.23  | Y38H6C.23  | chrV   | 0.535501 | 0.000163 |
| F09F7.6    | F09F7.6    | chrIII | 0.534979 | 0.000007 |
| K10D2.5    | K10D2.5    | chrIII | 0.534978 | 0.000000 |
| B0304.4    | B0304.4    | chrII  | 0.534971 | 0.000001 |
| Y48A6A.1   | zig-5      | chrIII | 0.534104 | 0.002272 |
| T22E5.1    | T22E5.1    | chrX   | 0.533711 | 0.013373 |
| Y50D7A.5   | Y50D7A.5   | chrIII | 0.533559 | 0.007112 |
| F08G12.8   | F08G12.8   | chrX   | 0.533453 | 0.016415 |
| Y65B4BR.6  | grl-16     | chrI   | 0.533217 | 0.000000 |
| M02D8.2    | M02D8.2    | chrX   | 0.532891 | 0.000975 |
| T22C1.4    | T22C1.4    | chrI   | 0.532829 | 0.000000 |
| M01G5.6    | ave-1      | chrIII | 0.532829 | 0.000000 |
| T08B1.2    | tnt-4      | chrV   | 0.532431 | 0.000000 |
| C34D4.2    | C34D4.2    | chrIV  | 0.532304 | 0.030831 |
| F45D3.4    | F45D3.4    | chrV   | 0.532248 | 0.000006 |
| Y57G11C.5  | Y57G11C.5  | chrIV  | 0.531908 | 0.010368 |
| F23B2.13   | rpb-12     | chrIV  | 0.531577 | 0.000000 |
| Y53F4B.45  | Y53F4B.45  | chrII  | 0.531504 | 0.000214 |
| ZK673.7    | tnc-2      | chrII  | 0.530675 | 0.000000 |
| Y54F10BM.3 | Y54F10BM.3 | chrIII | 0.530544 | 0.004880 |
| Y48D7A.2   | flp-18     | chrX   | 0.530468 | 0.000001 |
| Y54E5A.2   | Y54E5A.2   | chrI   | 0.530422 | 0.000376 |
| C09G5.7    | C09G5.7    | chrII  | 0.530257 | 0.007385 |
| F36A2.12   | F36A2.12   | chrI   | 0.530207 | 0.036641 |
| Y39A1A.24  | Y39A1A.24  | chrIII | 0.530179 | 0.000000 |
| K08F4.5    | K08F4.5    | chrIV  | 0.530090 | 0.011849 |
| C54D10.10  | C54D10.10  | chrV   | 0.530030 | 0.007036 |
| F22D6.15   | F22D6.15   | chrI   | 0.529999 | 0.010069 |
| C49A9.10   | C49A9.10   | chrIV  | 0.529792 | 0.000000 |
| C06E4.3    | C06E4.3    | chrIV  | 0.529490 | 0.028227 |
| ZK484.8    | nspd-1     | chrI   | 0.529473 | 0.000006 |
| K07C11.8   | K07C11.8   | chrV   | 0.529016 | 0.000016 |
| Y54G2A.47  | Y54G2A.47  | chrIV  | 0.528904 | 0.044997 |
| F45C12.4   | btb-9      | chrII  | 0.528803 | 0.000036 |
| F15A4.10   | F15A4.10   | chrII  | 0.528161 | 0.000000 |

|            |            |        |          |          |
|------------|------------|--------|----------|----------|
| F30B5.7    | F30B5.7    | chrIV  | 0.527764 | 0.000049 |
| R07E4.3    | R07E4.3    | chrX   | 0.527432 | 0.000000 |
| F45H7.6    | F45H7.6    | chrIII | 0.526844 | 0.003154 |
| F48C11.3   | nlp-3      | chrX   | 0.526674 | 0.000010 |
| C28C12.1   | C28C12.1   | chrIV  | 0.526419 | 0.012626 |
| T12B3.3    | T12B3.3    | chrIV  | 0.526391 | 0.000000 |
| C04A11.1   | C04A11.1   | chrX   | 0.526226 | 0.015213 |
| T19H12.3   | T19H12.3   | chrV   | 0.525956 | 0.000007 |
| T19B10.11  | mxl-1      | chrV   | 0.525938 | 0.000000 |
| ZK84.6     | ins-6      | chrII  | 0.525725 | 0.000453 |
| R03A10.1   | R03A10.1   | chrX   | 0.525680 | 0.000009 |
| F47D12.3   | F47D12.3   | chrIII | 0.525565 | 0.026797 |
| R13D11.3   | R13D11.3   | chrV   | 0.525137 | 0.002492 |
| F52A8.4    | glb-18     | chrI   | 0.524463 | 0.000776 |
| C24F3.2    | C24F3.2    | chrIV  | 0.524401 | 0.000000 |
| T25G3.1    | T25G3.1    | chrI   | 0.524307 | 0.000000 |
| R05D7.7    | R05D7.7    | chrI   | 0.524232 | 0.000562 |
| F25H5.10   | F25H5.10   | chrI   | 0.524209 | 0.004016 |
| T23E7.4    | nlp-6      | chrX   | 0.524115 | 0.000002 |
| C17E4.4    | C17E4.4    | chrI   | 0.524030 | 0.000003 |
| Y48G1A.2   | Y48G1A.2   | chrI   | 0.523818 | 0.000000 |
| C46H11.9   | phat-2     | chrI   | 0.523697 | 0.007904 |
| Y47D3A.13  | Y47D3A.13  | chrIII | 0.523635 | 0.042572 |
| F16C3.2    | F16C3.2    | chrI   | 0.523537 | 0.000019 |
| F27C1.4    | F27C1.4    | chrI   | 0.523532 | 0.000015 |
| F40F8.7    | pqm-1      | chrII  | 0.523204 | 0.000000 |
| Y106G6G.4  | Y106G6G.4  | chrI   | 0.522992 | 0.000214 |
| T06F4.1    | T06F4.1    | chrX   | 0.522936 | 0.000079 |
| T04D3.8    | T04D3.8    | chrI   | 0.522591 | 0.000001 |
| T16H12.2   | T16H12.2   | chrIII | 0.522357 | 0.000161 |
| F10E9.5    | F10E9.5    | chrIII | 0.522194 | 0.000000 |
| C42C1.12   | C42C1.12   | chrIV  | 0.522179 | 0.000000 |
| T07D4.5    | T07D4.5    | chrII  | 0.522034 | 0.000000 |
| F45H10.4   | drr-1      | chrII  | 0.521974 | 0.000008 |
| F15D4.3    | rmo-1      | chrII  | 0.521951 | 0.000000 |
| ZC328.2    | ZC328.2    | chrI   | 0.521932 | 0.000063 |
| F40F8.4    | F40F8.4    | chrII  | 0.521912 | 0.000000 |
| F57B10.11  | bag-1      | chrI   | 0.521887 | 0.000000 |
| R03D7.7    | nos-1      | chrII  | 0.521808 | 0.000000 |
| Y67A10A.10 | Y67A10A.10 | chrIV  | 0.521661 | 0.000723 |
| F11G11.10  | col-17     | chrII  | 0.521626 | 0.000004 |
| T19D2.3    | T19D2.3    | chrX   | 0.521076 | 0.035023 |
| F57C2.4    | F57C2.4    | chrII  | 0.520956 | 0.000000 |
| F59E12.12  | bli-2      | chrII  | 0.520916 | 0.000083 |
| C30F12.3   | C30F12.3   | chrI   | 0.520839 | 0.025407 |
| Y51H7C.3   | Y51H7C.3   | chrII  | 0.520832 | 0.000000 |
| CC4.2      | nlp-15     | chrI   | 0.520084 | 0.000021 |
| Y39B6A.40  | Y39B6A.40  | chrV   | 0.520030 | 0.000001 |
| C18H9.6    | C18H9.6    | chrII  | 0.519677 | 0.000000 |
| F18E9.2    | □□p-7      | chrX   | 0.519554 | 0.000182 |
| F08A7.1    | F08A7.1    | chrIV  | 0.519537 | 0.000587 |
| K05F1.2    | msp-142    | chrII  | 0.519411 | 0.009170 |
| R52.3      | math-35    | chrII  | 0.519336 | 0.000021 |
| F36D3.4    | F36D3.4    | chrV   | 0.519267 | 0.007690 |
| T09F5.12   | T09F5.12   | chrV   | 0.519131 | 0.000005 |
| C15F1.1    | C15F1.1    | chrII  | 0.519111 | 0.000000 |
| ZK813.3    | ZK813.3    | chrX   | 0.518917 | 0.000000 |
| Y37E11B.3  | Y37E11B.3  | chrIV  | 0.518794 | 0.000000 |
| MTCE.31    | MTCE.31    | chrM   | 0.518765 | 0.000000 |
| F44G4.3    | F44G4.3    | chrII  | 0.518469 | 0.000000 |
| F48F5.6    | F48F5.6    | chrV   | 0.518184 | 0.025042 |
| K12G11.3   | sodh-1     | chrV   | 0.518052 | 0.000000 |
| Y66A7A.7   | Y66A7A.7   | chrIII | 0.517970 | 0.008005 |



|            |            |        |          |          |
|------------|------------|--------|----------|----------|
| K09E4.4    | K09E4.4    | chrII  | 0.517767 | 0.004338 |
| F38A1.14   | clcc-169   | chrIV  | 0.517558 | 0.000103 |
| Y23H5A.8   | Y23H5A.8   | chrI   | 0.517551 | 0.038704 |
| T23G11.11  | T23G11.11  | chrI   | 0.517359 | 0.000008 |
| T07A9.13   | tag-261    | chrIV  | 0.516623 | 0.000000 |
| F42H10.2   | F42H10.2   | chrIII | 0.516595 | 0.000000 |
| C03G5.7    | flp-5      | chrX   | 0.516171 | 0.000019 |
| F09E5.16   | F09E5.16   | chrII  | 0.515664 | 0.000091 |
| C27F2.9    | C27F2.9    | chrIII | 0.515491 | 0.000113 |
| C03A7.14   | abu-8      | chrV   | 0.515462 | 0.008059 |
| C09G1.5    | C09G1.5    | chrX   | 0.515409 | 0.001835 |
| F10E9.11   | F10E9.11   | chrIII | 0.514394 | 0.000000 |
| ZK930.2    | ZK930.2    | chrII  | 0.514228 | 0.000002 |
| C02F12.3   | C02F12.3   | chrX   | 0.514103 | 0.000007 |
| ZK1307.4   | ZK1307.4   | chrII  | 0.513999 | 0.048767 |
| F28D1.6    | F28D1.6    | chrIV  | 0.513971 | 0.005024 |
| F54D10.4   | F54D10.4   | chrII  | 0.513811 | 0.000582 |
| F54C4.4    | F54C4.4    | chrIII | 0.512950 | 0.000008 |
| K09F6.4    | K09F6.4    | chrII  | 0.512865 | 0.000068 |
| Y53H1A.5   | nfya-2     | chrI   | 0.512462 | 0.000000 |
| T09A5.7    | T09A5.7    | chrII  | 0.512128 | 0.000000 |
| C35D10.8   | C35D10.8   | chrIII | 0.511642 | 0.000293 |
| Y37D8A.19  | Y37D8A.19  | chrIII | 0.511548 | 0.000000 |
| R07B1.9    | R07B1.9    | chrX   | 0.511147 | 0.001295 |
| R01H10.5   | R01H10.5   | chrIII | 0.510556 | 0.008046 |
| C16C8.5    | C16C8.5    | chrII  | 0.510498 | 0.000001 |
| Y18D10A.16 | Y18D10A.16 | chrI   | 0.510483 | 0.000000 |
| F54C9.3    | F54C9.3    | chrII  | 0.510382 | 0.000000 |
| Y57E12AR.1 | Y57E12AR.1 | chrV   | 0.510147 | 0.002630 |
| C48B4.9    | C48B4.9    | chrIII | 0.510101 | 0.000000 |
| ZK686.1    | ZK686.1    | chrIII | 0.509510 | 0.000000 |
| F20A1.10   | F20A1.10   | chrV   | 0.509451 | 0.000000 |
| C04H5.2    | clcc-147   | chrII  | 0.509434 | 0.000031 |
| Y47H9C.2   | dhhc-2     | chrI   | 0.509231 | 0.000095 |
| F57H12.6   | F57H12.6   | chrIV  | 0.508693 | 0.001329 |
| C33G8.4    | C33G8.4    | chrV   | 0.508020 | 0.000013 |
| T20B3.16   | clcc-36    | chrV   | 0.507936 | 0.022766 |
| Y71F9AR.4  | Y71F9AR.4  | chrI   | 0.507848 | 0.000002 |
| F29B9.11   | F29B9.11   | chrIV  | 0.507813 | 0.000000 |
| F31E9.6    | F31E9.6    | chrV   | 0.507796 | 0.000443 |
| Y45F10D.2  | Y45F10D.2  | chrIV  | 0.507764 | 0.018932 |
| F59D6.7    | F59D6.7    | chrV   | 0.507598 | 0.003414 |
| F08B12.4   | F08B12.4   | chrX   | 0.507411 | 0.000000 |
| C43F9.6    | nkb-2      | chrIV  | 0.507176 | 0.037082 |
| T19H5.1    | T19H5.1    | chrII  | 0.507127 | 0.031403 |
| M7.8       | M7.8       | chrIV  | 0.507080 | 0.007262 |
| F19F10.4   | ttr-10     | chrV   | 0.506840 | 0.001822 |
| F43C9.2    | F43C9.2    | chrX   | 0.506581 | 0.000001 |
| F33G12.7   | F33G12.7   | chrII  | 0.506459 | 0.000002 |
| B0238.1    | B0238.1    | chrV   | 0.506355 | 0.000181 |
| T21G5.6    | T21G5.6    | chrI   | 0.506318 | 0.000085 |
| C03H5.6    | C03H5.6    | chrII  | 0.506245 | 0.035625 |
| F29B9.9    | col-111    | chrIV  | 0.506157 | 0.000479 |
| ZK813.2    | ZK813.2    | chrX   | 0.506133 | 0.000000 |
| C14C10.1   | C14C10.1   | chrV   | 0.505889 | 0.000907 |
| ZK484.5    | ZK484.5    | chrI   | 0.505762 | 0.000001 |
| K08C9.8    | K08C9.8    | chrI   | 0.505733 | 0.008205 |
| K08E3.1    | tyr-2      | chrIII | 0.505652 | 0.000000 |
| R09B3.6    | R09B3.6    | chrI   | 0.505346 | 0.000042 |
| T19B4.4    | dnj-21     | chrI   | 0.504971 | 0.000000 |
| F26A3.5    | F26A3.5    | chrI   | 0.504906 | 0.044347 |
| ZK287.3    | ZK287.3    | chrV   | 0.504648 | 0.000041 |
| W02D9.7    | W02D9.7    | chrI   | 0.504525 | 0.000000 |

|           |           |        |          |          |
|-----------|-----------|--------|----------|----------|
| Y40B1B.7  | Y40B1B.7  | chrI   | 0.504166 | 0.000000 |
| F45E6.4   | lips-1    | chrX   | 0.503935 | 0.023048 |
| T05E12.7  | T05E12.7  | chrV   | 0.503778 | 0.000002 |
| ZC204.8   | fbxb-21   | chrII  | 0.503627 | 0.030935 |
| R12A1.3   | R12A1.3   | chrV   | 0.503592 | 0.011301 |
| C52D10.7  | skr-9     | chrIV  | 0.503485 | 0.000019 |
| T05A10.3  | ttr-14    | chrX   | 0.503351 | 0.000000 |
| E01H11.3  | flp-20    | chrX   | 0.502990 | 0.003693 |
| F15B9.2   | far-4     | chrV   | 0.502983 | 0.005899 |
| T21G5.4   | T21G5.4   | chrI   | 0.502925 | 0.000368 |
| F14H12.6  | F14H12.6  | chrX   | 0.502918 | 0.008873 |
| W07G9.2   | glct-6    | chrIV  | 0.502841 | 0.000016 |
| Y37D8A.25 | Y37D8A.25 | chrIII | 0.502770 | 0.000007 |
| Y42G9A.2  | Y42G9A.2  | chrIII | 0.502651 | 0.000834 |
| C06G3.8   | C06G3.8   | chrIV  | 0.502606 | 0.000000 |
| Y54G9A.9  | Y54G9A.9  | chrII  | 0.502337 | 0.000060 |
| F35C11.6  | F35C11.6  | chrII  | 0.502315 | 0.007403 |
| Y75D11A.3 | Y75D11A.3 | chrX   | 0.502216 | 0.000023 |
| F13C5.5   | F13C5.5   | chrX   | 0.501949 | 0.000003 |
| F32B5.4   | F32B5.4   | chrI   | 0.501924 | 0.012494 |
| Y71G12B.4 | pghm-1    | chrI   | 0.501797 | 0.000000 |
| F38A3.2   | ram-2     | chrII  | 0.501745 | 0.000000 |
| F10E7.2   | F10E7.2   | chrII  | 0.501525 | 0.000000 |
| F02E11.2  | F02E11.2  | chrII  | 0.501341 | 0.031013 |
| T21C9.9   | T21C9.9   | chrV   | 0.501277 | 0.000953 |
| Y70G10A.1 | Y70G10A.1 | chrIII | 0.501263 | 0.004550 |
| F59C6.12  | F59C6.12  | chrI   | 0.501257 | 0.000221 |
| F13A7.9   | F13A7.9   | chrV   | 0.501238 | 0.000009 |
| D1086.18  | D1086.18  | chrV   | 0.500981 | 0.036445 |
| F17C11.4  | F17C11.4  | chrV   | 0.500786 | 0.000001 |
| F17C11.2  | F17C11.2  | chrV   | 0.500709 | 0.000011 |
| Y11D7A.10 | Y11D7A.10 | chrIV  | 0.500700 | 0.000000 |
| T06E4.6   | col-146   | chrV   | 0.500403 | 0.000143 |
| Y48G1C.9  | Y48G1C.9  | chrI   | 0.500255 | 0.000000 |
| C06A5.12  | C06A5.12  | chrI   | 0.500016 | 0.000324 |
| ZC412.4   | ZC412.4   | chrV   | 0.499999 | 0.000584 |
| C14B9.1   | hsp-12.2  | chrIII | 0.499832 | 0.000000 |
| Y59A8B.20 | lon-8     | chrV   | 0.499192 | 0.000002 |
| Y92C3B.1  | kbp-4     | chrIII | 0.498974 | 0.000000 |
| K03B4.3   | taf-10    | chrV   | 0.498910 | 0.000000 |
| F37B1.5   | gst-16    | chrII  | 0.498684 | 0.001165 |
| ZK1248.6  | msh-64    | chrII  | 0.498678 | 0.029257 |
| C40H5.4   | lact-7    | chrX   | 0.498649 | 0.026797 |
| T11F9.5   | nas-21    | chrV   | 0.498623 | 0.010144 |
| F53A3.7   | F53A3.7   | II     | 0.498515 | 0.000005 |
| C46C2.7   | C46C2.7   | chrIV  | 0.498429 | 0.000439 |
| C36B1.6   | C36B1.6   | chrI   | 0.498046 | 0.010571 |
| R05A10.2  | R05A10.2  | chrIV  | 0.498003 | 0.000550 |
| R09H10.3  | R09H10.3  | chrIV  | 0.497881 | 0.000000 |
| F17C11.3  | col-153   | chrV   | 0.497801 | 0.000055 |
| C02G6.1   | C02G6.1   | chrV   | 0.497660 | 0.000312 |
| F17E9.5   | F17E9.5   | chrIV  | 0.497576 | 0.000004 |
| Y54G2A.14 | clec-83   | chrIV  | 0.497490 | 0.000000 |
| C16D9.4   | C16D9.4   | chrV   | 0.497414 | 0.005462 |
| F40F8.9   | lsm-1     | chrII  | 0.497226 | 0.000000 |
| Y71D11A.2 | smr-1     | chrIII | 0.496905 | 0.000000 |
| C06E1.11  | C06E1.11  | chrIII | 0.496816 | 0.008442 |
| F22H10.6  | F22H10.6  | chrX   | 0.496806 | 0.000002 |
| F15D4.4   | F15D4.4   | chrII  | 0.496729 | 0.003361 |
| C08A9.8   | C08A9.8   | chrX   | 0.496683 | 0.007449 |
| Y52B11A.2 | Y52B11A.2 | chrI   | 0.496623 | 0.000000 |
| T21C9.8   | ttr-23    | chrV   | 0.496587 | 0.029579 |
| F54D7.4   | zig-7     | chrI   | 0.496519 | 0.000001 |

|             |             |        |          |          |
|-------------|-------------|--------|----------|----------|
| B0412.1     | dac-1       | chrIII | 0.496478 | 0.016530 |
| ZC449.4     | ZC449.4     | chrX   | 0.496428 | 0.001778 |
| C02F5.5     | C02F5.5     | chrIII | 0.496261 | 0.010952 |
| R09E12.9    | R09E12.9    | chrV   | 0.496242 | 0.001417 |
| C38C3.4     | C38C3.4     | chrV   | 0.496184 | 0.001872 |
| F28D1.11    | dpm-3       | chrIV  | 0.495969 | 0.000000 |
| DY3.8       | DY3.8       | chrI   | 0.495834 | 0.000000 |
| F10D2.5     | ugt-40      | chrV   | 0.495355 | 0.003514 |
| R11D1.3     | R11D1.3     | chrV   | 0.495213 | 0.007088 |
| T22F7.4     | T22F7.4     | chrIII | 0.495055 | 0.000992 |
| Y51A2D.14   | Y51A2D.14   | chrV   | 0.495012 | 0.000000 |
| ZK721.3     | ZK721.3     | chrX   | 0.494877 | 0.018266 |
| F46F6.4     | dyf-6       | chrX   | 0.494564 | 0.029437 |
| T23E1.2     | T23E1.2     | chrIV  | 0.494412 | 0.001242 |
| T08G5.10    | mtl-2       | chrV   | 0.493983 | 0.000000 |
| Y40B1A.1    | Y40B1A.1    | chrI   | 0.493574 | 0.000001 |
| ZC334.11    | ins-27      | chrI   | 0.493501 | 0.009663 |
| Y41C4A.13   | Y41C4A.13   | chrIII | 0.493062 | 0.000002 |
| F23H11.7    | F23H11.7    | chrIII | 0.492934 | 0.014039 |
| CD4.1       | CD4.1       | chrV   | 0.492244 | 0.006859 |
| Y39G10AR.15 | Y39G10AR.15 | chrI   | 0.492224 | 0.000000 |
| ZC416.2     | ZC416.2     | chrIV  | 0.492079 | 0.005919 |
| Y67D8A.3    | Y67D8A.3    | chrIV  | 0.492077 | 0.000000 |
| K09E4.5     | gur-4       | chrII  | 0.492069 | 0.021668 |
| K12G11.2    | sulp-5      | chrV   | 0.491993 | 0.019082 |
| C50C3.5     | C50C3.5     | chrIII | 0.491973 | 0.006180 |
| T23G5.5     | dat-1       | chrIII | 0.491940 | 0.035977 |
| Y53F4B.14   | Y53F4B.14   | chrII  | 0.491928 | 0.000000 |
| C15C8.7     | C15C8.7     | chrV   | 0.491351 | 0.000000 |
| T05D4.5     | T05D4.5     | chrIII | 0.491215 | 0.042668 |
| R13D7.2     | R13D7.2     | chrV   | 0.490395 | 0.000017 |
| K09F6.11    | K09F6.11    | chrII  | 0.490112 | 0.019276 |
| T02G5.1     | T02G5.1     | chrII  | 0.490012 | 0.010870 |
| M02H5.5     | nhr-203     | chrV   | 0.489650 | 0.000025 |
| ZC247.1     | ZC247.1     | chrI   | 0.489416 | 0.000000 |
| H06A10.1    | H06A10.1    | chrX   | 0.489361 | 0.000011 |
| F55H12.5    | F55H12.5    | chrI   | 0.489182 | 0.020766 |
| F08D12.2    | F08D12.2    | chrII  | 0.489057 | 0.000011 |
| Y69A2AR.3   | Y69A2AR.3   | chrIV  | 0.488741 | 0.000000 |
| F58E10.4    | aip-1       | chrV   | 0.488665 | 0.000000 |
| E02H9.4     | E02H9.4     | chrIII | 0.488600 | 0.020329 |
| T20D3.8     | T20D3.8     | chrIV  | 0.488442 | 0.000000 |
| K12B6.9     | K12B6.9     | chrV   | 0.488425 | 0.000160 |
| Y66A7A.2    | Y66A7A.2    | chrIII | 0.488383 | 0.000001 |
| ZC443.1     | ZC443.1     | chrV   | 0.488335 | 0.000073 |
| D1007.14    | pqn-24      | chrI   | 0.488296 | 0.000000 |
| Y75B8A.18   | Y75B8A.18   | chrIII | 0.488217 | 0.000000 |
| B0564.3     | B0564.3     | chrIV  | 0.487838 | 0.011076 |
| C52B11.3    | dop-4       | chrX   | 0.487806 | 0.000170 |
| Y53F4B.8    | Y53F4B.8    | chrII  | 0.487401 | 0.010190 |
| F13E6.3     | F13E6.3     | chrX   | 0.487359 | 0.000214 |
| C13C12.1    | cal-1       | chrV   | 0.487196 | 0.000208 |
| T05A8.3     | T05A8.3     | chrII  | 0.487045 | 0.000001 |
| D2023.1     | D2023.1     | chrV   | 0.486979 | 0.000038 |
| Y53F4B.12   | Y53F4B.12   | chrII  | 0.486958 | 0.009539 |
| ZC15.8      | pqn-94      | chrV   | 0.486951 | 0.000002 |
| C36A4.14    | C36A4.14    | chrIII | 0.486883 | 0.000053 |
| C54F6.14    | ftn-1       | chrV   | 0.486768 | 0.008312 |
| ZK970.3     | mdt-22      | chrII  | 0.486402 | 0.000000 |
| Y34F4.1     | Y34F4.1     | chrIII | 0.486393 | 0.000496 |
| ZC204.11    | btb-13      | chrII  | 0.486018 | 0.029579 |
| B0412.4     | rps-29      | chrIII | 0.486002 | 0.000000 |
| F14H3.5     | F14H3.5     | chrV   | 0.485967 | 0.000000 |

|            |            |        |          |          |
|------------|------------|--------|----------|----------|
| M01B2.6    | M01B2.6    | chrV   | 0.485622 | 0.010331 |
| F46C3.4    | F46C3.4    | chrX   | 0.485593 | 0.000225 |
| T09A5.6    | mdt-10     | chrII  | 0.485582 | 0.000000 |
| C04F12.5   | C04F12.5   | chrI   | 0.485410 | 0.000004 |
| C45H4.14   | C45H4.14   | chrV   | 0.485275 | 0.000002 |
| T09A12.5   | T09A12.5   | chrIV  | 0.485129 | 0.000000 |
| D2045.8    | D2045.8    | chrIII | 0.484731 | 0.000323 |
| T05A7.7    | T05A7.7    | chrII  | 0.484539 | 0.018932 |
| Y119C1B.6  | Y119C1B.6  | chrI   | 0.484334 | 0.033472 |
| Y82E9BR.22 | Y82E9BR.22 | chrIII | 0.484203 | 0.000001 |
| F56C11.3   | F56C11.3   | chrI   | 0.484081 | 0.000011 |
| Y47G6A.24  | mis-12     | chrI   | 0.483790 | 0.000000 |
| T07A9.14   | T07A9.14   | chrIV  | 0.483592 | 0.000000 |
| F38E11.7   | wrt-3      | chrIV  | 0.483511 | 0.001663 |
| C03G6.5    | C03G6.5    | chrV   | 0.483413 | 0.041962 |
| H23N18.3   | ugt-8      | chrV   | 0.482692 | 0.000090 |
| T01B10.2   | grd-14     | chrX   | 0.482248 | 0.000002 |
| F15A4.5    | F15A4.5    | chrII  | 0.482171 | 0.006137 |
| F52F12.5   | F52F12.5   | chrI   | 0.481955 | 0.029088 |
| C30B5.4    | C30B5.4    | chrII  | 0.481910 | 0.000000 |
| ZK546.4    | ZK546.4    | chrII  | 0.481903 | 0.045798 |
| M02F4.8    | aqp-7      | chrX   | 0.481725 | 0.000000 |
| T26E3.2    | ndx-1      | chrI   | 0.481445 | 0.000190 |
| Y32G9B.1   | Y32G9B.1   | chrV   | 0.481041 | 0.008005 |
| F58H10.1   | F58H10.1   | chrI   | 0.480808 | 0.019063 |
| ZC513.12   | sth-1      | chrV   | 0.480587 | 0.000733 |
| K02E10.7   | K02E10.7   | chrX   | 0.480510 | 0.019817 |
| B0336.8    | lgg-3      | chrIII | 0.480496 | 0.000000 |
| C08E8.10   | C08E8.10   | chrV   | 0.480489 | 0.025801 |
| C02E7.6    | C02E7.6    | chrV   | 0.480486 | 0.000011 |
| Y54G11A.9  | Y54G11A.9  | chrII  | 0.480299 | 0.000001 |
| F01D5.2    | F01D5.2    | chrII  | 0.480214 | 0.034494 |
| F43G6.7    | F43G6.7    | chrII  | 0.480208 | 0.000003 |
| F25E5.4    | F25E5.4    | chrV   | 0.480199 | 0.000162 |
| Y73B6BL.34 | col-112    | chrIV  | 0.479872 | 0.000000 |
| F47B7.7    | F47B7.7    | chrX   | 0.479833 | 0.000002 |
| F21C10.3   | F21C10.3   | chrV   | 0.479433 | 0.006386 |
| F29C4.2    | F29C4.2    | chrIV  | 0.478879 | 0.000000 |
| Y38E10A.24 | Y38E10A.24 | chrII  | 0.478778 | 0.000000 |
| T27E9.2    | T27E9.2    | chrIII | 0.478446 | 0.000000 |
| ZK909.6    | ZK909.6    | chrI   | 0.478381 | 0.000100 |
| C36H8.3    | flp-9      | chrIV  | 0.477989 | 0.000002 |
| ZK686.4    | ZK686.4    | chrIII | 0.477843 | 0.000000 |
| C14A11.9   | C14A11.9   | chrX   | 0.477841 | 0.000001 |
| Y38F1A.1   | Y38F1A.1   | chrII  | 0.477738 | 0.010796 |
| K09F6.6    | K09F6.6    | chrII  | 0.477315 | 0.000006 |
| F20A1.1    | F20A1.1    | chrV   | 0.477042 | 0.000000 |
| K05F6.7    | fbxb-54    | chrII  | 0.476872 | 0.001650 |
| ZC373.2    | ZC373.2    | chrX   | 0.476805 | 0.000000 |
| F58D5.7    | F58D5.7    | chrI   | 0.476771 | 0.022787 |
| F26B1.8    | F26B1.8    | chrI   | 0.476514 | 0.000551 |
| T10F2.5    | T10F2.5    | chrIII | 0.476512 | 0.000001 |
| W01A8.6    | W01A8.6    | chrI   | 0.476453 | 0.000505 |
| K07F5.9    | ssp-10     | chrIV  | 0.476384 | 0.004988 |
| Y41G9A.10  | Y41G9A.10  | chrX   | 0.476360 | 0.000730 |
| E03D2.1    | nlp-13     | chrV   | 0.476271 | 0.000005 |
| Y43B11AR.1 | Y43B11AR.1 | chrIV  | 0.476157 | 0.000003 |
| C04G6.2    | C04G6.2    | chrII  | 0.476105 | 0.034760 |
| C33A12.4   | C33A12.4   | chrIV  | 0.476019 | 0.002090 |
| Y50D4A.5   | Y50D4A.5   | chrV   | 0.475632 | 0.000238 |
| B0285.3    | B0285.3    | chrIII | 0.475579 | 0.000000 |
| C35B1.4    | C35B1.4    | chrIV  | 0.475474 | 0.000000 |
| Y59H11AR.6 | Y59H11AR.6 | chrIV  | 0.474876 | 0.000139 |

|            |            |        |          |          |
|------------|------------|--------|----------|----------|
| Y47H9C.10  | fbxa-216   | chrI   | 0.474524 | 0.000023 |
| Y95B8A.2   | Y95B8A.2   | chrI   | 0.474434 | 0.003370 |
| Y38E10A.13 | nspe-1     | chrII  | 0.474363 | 0.007075 |
| D1053.3    | D1053.3    | chrX   | 0.474312 | 0.001372 |
| F59A1.9    | F59A1.9    | chrV   | 0.474197 | 0.000007 |
| C24D10.6   | C24D10.6   | chrIV  | 0.473621 | 0.000000 |
| B0213.2    | nlp-27     | chrV   | 0.473232 | 0.000000 |
| B0546.4    | B0546.4    | chrIV  | 0.472902 | 0.000002 |
| T24H7.4    | T24H7.4    | chrII  | 0.472694 | 0.000002 |
| F13H10.8   | F13H10.8   | chrIV  | 0.472651 | 0.000000 |
| Y54E10A.5  | dnc-6      | chrI   | 0.472501 | 0.000000 |
| C52A10.1   | C52A10.1   | chrV   | 0.472469 | 0.000000 |
| K07A1.4    | K07A1.4    | chrI   | 0.472431 | 0.045578 |
| B0547.3    | B0547.3    | chrIV  | 0.472385 | 0.002783 |
| T04F3.4    | T04F3.4    | chrV   | 0.472313 | 0.000116 |
| F27D4.7    | F27D4.7    | chrI   | 0.471941 | 0.000000 |
| F10D2.6    | ugt-37     | chrV   | 0.471710 | 0.000449 |
| ZC455.1    | ZC455.1    | chrV   | 0.471508 | 0.000582 |
| C56A3.4    | C56A3.4    | chrV   | 0.471202 | 0.000000 |
| F09E10.1   | F09E10.1   | chrX   | 0.471157 | 0.000165 |
| W10D9.3    | W10D9.3    | chrII  | 0.471125 | 0.000051 |
| C24H11.6   | immp-1     | chrIII | 0.470986 | 0.000020 |
| Y113G7B.11 | Y113G7B.11 | chrV   | 0.470382 | 0.032225 |
| F20D1.10   | tag-299    | chrX   | 0.469843 | 0.000045 |
| F26H9.4    | F26H9.4    | chrI   | 0.469516 | 0.000003 |
| R148.6     | heh-1      | chrIII | 0.468985 | 0.000000 |
| T04C12.4   | act-3      | chrV   | 0.468903 | 0.000000 |
| F21F3.1    | pgal-1     | chrI   | 0.468822 | 0.000000 |
| R02C2.7    | R02C2.7    | chrV   | 0.468630 | 0.000040 |
| T08B6.5    | T08B6.5    | chrIV  | 0.468460 | 0.000843 |
| Y38C1AA.13 | gfrp-1     | chrIV  | 0.468276 | 0.002030 |
| F34D6.3    | sup-9      | chrII  | 0.468231 | 0.036590 |
| T03E6.8    | T03E6.8    | chrV   | 0.468202 | 0.000313 |
| C04H5.7    | C04H5.7    | chrII  | 0.468179 | 0.000001 |
| F32E10.9   | F32E10.9   | chrIV  | 0.468130 | 0.000031 |
| Y73B6BL.23 | Y73B6BL.23 | chrIV  | 0.467943 | 0.000000 |
| T27B2.1    | T27B2.1    | chrV   | 0.467876 | 0.046050 |
| Y77E11A.4  | jtr-1      | chrIV  | 0.467868 | 0.000001 |
| ZK899.6    | ZK899.6    | chrX   | 0.467600 | 0.000988 |
| K01H12.1   | dph-3      | chrIV  | 0.467558 | 0.000003 |
| M04B2.6    | M04B2.6    | chrIV  | 0.467502 | 0.029193 |
| C14B1.12   | C14B1.12   | chrIII | 0.467475 | 0.000000 |
| F29A7.1    | fbxb-106   | chrII  | 0.467380 | 0.005377 |
| C30G4.7    | C30G4.7    | chrX   | 0.467248 | 0.000280 |
| T21D12.2   | dpy-9      | chrIV  | 0.467182 | 0.003734 |
| F31F6.4    | flp-8      | chrX   | 0.467082 | 0.000203 |
| W02D3.12   | W02D3.12   | chrI   | 0.466709 | 0.000009 |
| Y48A6B.7   | Y48A6B.7   | chrIII | 0.466663 | 0.000011 |
| B0205.12   | B0205.12   | chrI   | 0.466413 | 0.000070 |
| Y47D3B.2   | nlp-21     | chrIII | 0.466340 | 0.000021 |
| F32A5.5    | aqp-1      | chrII  | 0.466285 | 0.000001 |
| T27F2.3    | bir-1      | chrV   | 0.466276 | 0.000000 |
| C03E10.6   | clcc-222   | chrV   | 0.466168 | 0.000005 |
| R03D7.6    | gst-5      | chrII  | 0.466064 | 0.000001 |
| B0416.7    | B0416.7    | chrX   | 0.465943 | 0.000528 |
| F55C5.1    | F55C5.1    | chrV   | 0.465916 | 0.005843 |
| R13F6.1    | kbp-1      | chrIII | 0.465814 | 0.000000 |
| F13G3.10   | F13G3.10   | chrI   | 0.465595 | 0.000000 |
| D2007.1    | D2007.1    | chrIII | 0.465553 | 0.000431 |
| C34F11.6   | msh-49     | chrII  | 0.465522 | 0.045458 |
| D2005.3    | D2005.3    | chrI   | 0.465469 | 0.000000 |
| ZC239.21   | ZC239.21   | chrII  | 0.465427 | 0.012838 |
| W04C9.2    | W04C9.2    | chrI   | 0.465002 | 0.000000 |

|            |            |        |          |          |
|------------|------------|--------|----------|----------|
| Y51H4A.8   | Y51H4A.8   | chrIV  | 0.464887 | 0.001913 |
| T02C1.1    | T02C1.1    | chrIII | 0.464877 | 0.003393 |
| Y51F10.2   | Y51F10.2   | chrI   | 0.464754 | 0.000000 |
| T19A6.3    | T19A6.3    | chrI   | 0.464505 | 0.000001 |
| C02D4.2    | ser-2      | chrX   | 0.464461 | 0.043566 |
| C16C4.18   | C16C4.18   | chrII  | 0.464062 | 0.038206 |
| T20F10.5   | T20F10.5   | chrI   | 0.463901 | 0.017182 |
| C15H9.11   | C15H9.11   | chrX   | 0.463447 | 0.000766 |
| ZK75.1     | ins-4      | chrII  | 0.463088 | 0.038206 |
| Y82E9BR.21 | Y82E9BR.21 | chrIII | 0.462865 | 0.026043 |
| Y39F10A.1  | Y39F10A.1  | chrII  | 0.462686 | 0.035624 |
| W04E12.8   | clec-50    | chrV   | 0.462093 | 0.000000 |
| R10A10.2   | rbx-2      | chrI   | 0.461798 | 0.000001 |
| D1014.4    | D1014.4    | chrV   | 0.461400 | 0.000000 |
| F22B5.1    | evl-20     | chrII  | 0.461363 | 0.000002 |
| W04A4.6    | W04A4.6    | chrI   | 0.461325 | 0.001659 |
| K08F4.6    | gst-2      | chrIV  | 0.461232 | 0.031663 |
| C52E4.1    | cpr-1      | chrV   | 0.461142 | 0.000000 |
| C03G5.11   | nspc-4     | chrX   | 0.460954 | 0.000070 |
| ZK616.2    | ZK616.2    | chrIV  | 0.460889 | 0.002190 |
| F52E1.7    | hsp-17     | chrV   | 0.460643 | 0.000002 |
| F28F8.9    | F28F8.9    | chrV   | 0.460371 | 0.000001 |
| F52F12.1   | oct-1      | chrI   | 0.460259 | 0.000909 |
| AC3.8      | ugt-2      | chrV   | 0.460200 | 0.000398 |
| W03G9.8    | W03G9.8    | chrI   | 0.459832 | 0.000001 |
| F57F4.4    | F57F4.4    | chrV   | 0.459766 | 0.000000 |
| R10E11.5   | R10E11.5   | chrIII | 0.459753 | 0.007030 |
| ZK632.9    | ZK632.9    | chrIII | 0.459480 | 0.000000 |
| C53B7.3    | C53B7.3    | chrX   | 0.458589 | 0.000000 |
| R11.4      | R11.4      | chrX   | 0.458505 | 0.000148 |
| F54A3.5    | F54A3.5    | chrII  | 0.458469 | 0.000000 |
| C34B2.2    | kbp-5      | chrI   | 0.458399 | 0.000000 |
| Y63D3A.7   | Y63D3A.7   | chrI   | 0.458102 | 0.000001 |
| Y55B1AL.2  | Y55B1AL.2  | chrIII | 0.458036 | 0.000001 |
| ZK813.1    | ZK813.1    | chrX   | 0.458031 | 0.000000 |
| C35A11.1   | C35A11.1   | chrV   | 0.456857 | 0.040766 |
| F15A4.12   | tag-280    | chrII  | 0.456664 | 0.000021 |
| F40E10.2   | sox-3      | chrX   | 0.456606 | 0.035150 |
| F59C6.14   | F59C6.14   | chrI   | 0.456158 | 0.001754 |
| B0432.13   | B0432.13   | chrII  | 0.455974 | 0.000002 |
| T09F5.9    | clec-47    | chrV   | 0.455911 | 0.000010 |
| F47B8.2    | F47B8.2    | chrV   | 0.455639 | 0.000111 |
| C49C3.5    | C49C3.5    | chrIV  | 0.455240 | 0.000240 |
| Y47D3A.31  | Y47D3A.31  | chrIII | 0.455039 | 0.021797 |
| F09C3.2    | F09C3.2    | chrI   | 0.454917 | 0.000999 |
| K07F5.5    | nspd-2     | chrIV  | 0.454845 | 0.000116 |
| F35H10.5   | F35H10.5   | chrIV  | 0.454557 | 0.000066 |
| C02F5.14   | C02F5.14   | chrIII | 0.454342 | 0.000674 |
| C26F1.9    | rpl-39     | chrV   | 0.454323 | 0.000000 |
| T28D9.4    | T28D9.4    | chrII  | 0.453943 | 0.000000 |
| T11F9.6    | nas-22     | chrV   | 0.453877 | 0.008694 |
| C25D7.10   | C25D7.10   | chrV   | 0.453845 | 0.000003 |
| T03F1.12   | T03F1.12   | chrI   | 0.453323 | 0.000003 |
| F28F8.2    | acs-2      | chrV   | 0.452994 | 0.000000 |
| Y19D10B.6  | Y19D10B.6  | chrV   | 0.452932 | 0.013927 |
| K03B8.8    | K03B8.8    | chrV   | 0.452898 | 0.000265 |
| C38D4.7    | C38D4.7    | chrIII | 0.452729 | 0.030410 |
| F13D12.8   | F13D12.8   | chrII  | 0.452606 | 0.001903 |
| T05E11.8   | T05E11.8   | chrIV  | 0.452335 | 0.004917 |
| C52D10.11  | flp-17     | chrIV  | 0.452047 | 0.000099 |
| Y60A3A.21  | Y60A3A.21  | chrV   | 0.451658 | 0.000027 |
| Y46H3C.6   | Y46H3C.6   | chrV   | 0.451637 | 0.038167 |
| F54C4.2    | spt-4      | chrIII | 0.451596 | 0.000000 |

|            |            |        |          |          |
|------------|------------|--------|----------|----------|
| K02D7.5    | K02D7.5    | chrIV  | 0.451594 | 0.001330 |
| F07H5.4    | F07H5.4    | chrII  | 0.451477 | 0.000005 |
| Y37E11B.6  | Y37E11B.6  | chrIV  | 0.451223 | 0.000006 |
| F40F11.3   | F40F11.3   | chrIV  | 0.451173 | 0.000001 |
| F31E3.2    | F31E3.2    | chrIII | 0.451066 | 0.002666 |
| T07A5.6    | unc-69     | chrIII | 0.450914 | 0.000001 |
| Y94H6A.12  | Y94H6A.12  | chrIV  | 0.450838 | 0.000234 |
| F41D9.2    | F41D9.2    | chrX   | 0.450811 | 0.000033 |
| ZC373.7    | col-176    | chrX   | 0.450713 | 0.002492 |
| R105.1     | R105.1     | chrIV  | 0.450659 | 0.012019 |
| Y49E10.22  | pstk-1     | chrIII | 0.450650 | 0.000448 |
| Y52E8A.2   | Y52E8A.2   | chrII  | 0.450384 | 0.000002 |
| C31H5.4    | C31H5.4    | chrI   | 0.450224 | 0.000004 |
| R10E4.5    | nth-1      | chrIII | 0.449886 | 0.000004 |
| F42G4.5    | F42G4.5    | chrII  | 0.449759 | 0.000068 |
| F26B1.4    | col-58     | chrI   | 0.449692 | 0.016931 |
| C05D11.13  | C05D11.13  | chrIII | 0.449495 | 0.000063 |
| ZK262.2    | ZK262.2    | chrV   | 0.449377 | 0.014102 |
| ZK380.t2   | ZK380.t2   | chrX   | 0.449344 | 0.000037 |
| F21F3.7    | F21F3.7    | chrI   | 0.449103 | 0.000003 |
| K08B4.3    | ugt-19     | chrIV  | 0.448942 | 0.000939 |
| F41B5.10   | nhr-183    | chrV   | 0.448709 | 0.009592 |
| F44E5.1    | F44E5.1    | chrII  | 0.448553 | 0.000000 |
| T05F1.11   | T05F1.11   | chrI   | 0.448552 | 0.037294 |
| K03H6.6    | K03H6.6    | chrIV  | 0.448432 | 0.000417 |
| T14B4.4    | tsp-10     | chrII  | 0.448240 | 0.000441 |
| F40F4.5    | tba-9      | chrX   | 0.448122 | 0.000071 |
| Y18H1A.2   | Y18H1A.2   | chrI   | 0.448071 | 0.000001 |
| C53C9.3    | kvs-1      | chrX   | 0.448049 | 0.033494 |
| C33H5.19   | tag-321    | chrIV  | 0.448044 | 0.000000 |
| K04G2.11   | K04G2.11   | chrI   | 0.447877 | 0.000035 |
| C13F10.1   | C13F10.1   | chrV   | 0.447715 | 0.036698 |
| F47G3.4    | F47G3.4    | chrX   | 0.447670 | 0.000252 |
| F54B8.4    | F54B8.4    | chrV   | 0.447624 | 0.009800 |
| ZK593.2    | ZK593.2    | chrIV  | 0.447618 | 0.015666 |
| F59E11.8   | nhr-194    | chrV   | 0.447613 | 0.042413 |
| C18A3.6    | rab-3      | chrII  | 0.447591 | 0.000191 |
| C18A3.10   | C18A3.10   | chrII  | 0.447540 | 0.045326 |
| T01C3.2    | T01C3.2    | chrV   | 0.447209 | 0.000001 |
| C46G7.5    | C46G7.5    | chrIV  | 0.447208 | 0.006940 |
| ZK970.4    | vha-9      | chrII  | 0.447202 | 0.000000 |
| W06D4.2    | W06D4.2    | chrI   | 0.446886 | 0.018172 |
| K12H4.5    | K12H4.5    | chrIII | 0.446668 | 0.000000 |
| Y47D3A.20  | Y47D3A.20  | chrIII | 0.446495 | 0.000053 |
| F40A3.6    | F40A3.6    | chrV   | 0.446486 | 0.000011 |
| T12A2.7    | T12A2.7    | chrIII | 0.446481 | 0.000001 |
| F10E9.2    | F10E9.2    | chrIII | 0.446404 | 0.046667 |
| Y46H3C.5   | Y46H3C.5   | chrV   | 0.446132 | 0.000026 |
| T20H4.1    | osm-10     | chrIII | 0.445977 | 0.028227 |
| Y41D4B.12  | set-23     | chrIV  | 0.445969 | 0.000003 |
| F59E12.10  | ddl-1      | chrII  | 0.445918 | 0.000003 |
| Y57G11C.40 | Y57G11C.40 | chrIV  | 0.445912 | 0.048907 |
| K02F3.9    | K02F3.9    | chrIII | 0.445910 | 0.000003 |
| C40H1.5    | ttr-5      | chrIII | 0.445628 | 0.000071 |
| F14H3.4    | F14H3.4    | chrV   | 0.445054 | 0.000001 |
| T15B7.5    | col-141    | chrV   | 0.445049 | 0.007734 |
| Y49E10.15  | snr-6      | chrIII | 0.444834 | 0.000000 |
| K02F3.3    | far-8      | chrIII | 0.444103 | 0.000001 |
| R05D11.7   | R05D11.7   | chrI   | 0.443903 | 0.000000 |
| D2085.7    | D2085.7    | chrII  | 0.443448 | 0.031560 |
| Y57G11C.51 | Y57G11C.51 | chrIV  | 0.443418 | 0.000006 |
| JC8.4      | JC8.4      | chrIV  | 0.443090 | 0.000014 |
| F39H2.1    | flp-22     | chrI   | 0.442886 | 0.000018 |

|            |            |        |          |          |
|------------|------------|--------|----------|----------|
| F22B7.9    | F22B7.9    | chrIII | 0.442802 | 0.000145 |
| Y54G11A.4  | Y54G11A.4  | chrII  | 0.442734 | 0.010124 |
| B0432.14   | B0432.14   | chrII  | 0.442303 | 0.039658 |
| Y116A8C.22 | Y116A8C.22 | chrIV  | 0.442205 | 0.000266 |
| T08E11.2   | math-39    | chrII  | 0.442105 | 0.013024 |
| F54D1.4    | nhr-7      | chrIV  | 0.442002 | 0.001350 |
| C27A2.4    | pho-12     | chrII  | 0.441899 | 0.010279 |
| Y53C10A.5  | Y53C10A.5  | chrI   | 0.441730 | 0.000002 |
| F42G8.7    | F42G8.7    | chrIV  | 0.441692 | 0.002110 |
| E01G4.6    | E01G4.6    | chrII  | 0.441442 | 0.000005 |
| C05C10.5   | C05C10.5   | chrII  | 0.441280 | 0.000000 |
| Y62E10A.1  | rla-2      | chrIV  | 0.441210 | 0.000000 |
| F15D3.4    | F15D3.4    | chrI   | 0.441210 | 0.039288 |
| C54E4.4    | C54E4.4    | chrIV  | 0.441167 | 0.027488 |
| K10D2.4    | apc-16     | chrIII | 0.441116 | 0.000002 |
| B0222.8    | col-10     | chrV   | 0.441017 | 0.000145 |
| Y73E7A.6   | Y73E7A.6   | chrI   | 0.440888 | 0.000002 |
| F40D4.17   | F40D4.17   | chrV   | 0.440814 | 0.000838 |
| T11B7.3    | col-118    | chrIV  | 0.440719 | 0.000003 |
| C29F4.1    | col-125    | chrIV  | 0.440712 | 0.000006 |
| C32D5.1    | C32D5.1    | chrII  | 0.440520 | 0.027582 |
| Y39B6A.3   | Y39B6A.3   | chrV   | 0.440515 | 0.000003 |
| Y69A2AR.22 | Y69A2AR.22 | chrIV  | 0.440265 | 0.000063 |
| C01G5.2    | prg-2      | chrIV  | 0.440200 | 0.000000 |
| C01F6.9    | C01F6.9    | chrIV  | 0.440097 | 0.000001 |
| C36C5.5    | C36C5.5    | chrV   | 0.440030 | 0.000282 |
| K11B4.2    | K11B4.2    | chrI   | 0.439913 | 0.000002 |
| F14H3.12   | F14H3.12   | chrV   | 0.439497 | 0.008046 |
| C35D10.17  | C35D10.17  | chrIII | 0.439188 | 0.000019 |
| Y106G6H.4  | Y106G6H.4  | chrI   | 0.439167 | 0.019030 |
| T20G5.9    | T20G5.9    | chrIII | 0.439119 | 0.000002 |
| F32D1.2    | F32D1.2    | chrV   | 0.439097 | 0.000000 |
| F59G1.7    | frh-1      | chrII  | 0.438747 | 0.000010 |
| F32D1.6    | F32D1.6    | chrV   | 0.438745 | 0.000000 |
| D1086.12   | D1086.12   | chrV   | 0.438706 | 0.000027 |
| ZK792.4    | ZK792.4    | chrIV  | 0.438651 | 0.013702 |
| Y54G2A.52  | Y54G2A.52  | chrIV  | 0.438441 | 0.003891 |
| C50F4.8    | C50F4.8    | chrV   | 0.438431 | 0.000023 |
| C51E3.10   | C51E3.10   | chrV   | 0.438416 | 0.005644 |
| Y48G1BM.8  | Y48G1BM.8  | chrI   | 0.437905 | 0.011401 |
| EEED8.3    | EEED8.3    | chrII  | 0.437797 | 0.000000 |
| C55F2.1    | C55F2.1    | chrIV  | 0.437738 | 0.000001 |
| Y65B4BL.4  | Y65B4BL.4  | chrI   | 0.437091 | 0.000001 |
| T18H9.1    | grd-6      | chrV   | 0.436984 | 0.000575 |
| C52D10.6   | skr-12     | chrIV  | 0.436977 | 0.003467 |
| ZK1067.7   | pqn-95     | chrII  | 0.436879 | 0.000015 |
| T28H11.8   | T28H11.8   | chrIV  | 0.436832 | 0.006871 |
| T20B3.7    | phy-3      | chrV   | 0.436787 | 0.024527 |
| M110.10    | M110.10    | chrII  | 0.436770 | 0.005897 |
| T11F9.11   | dhs-19     | chrV   | 0.436749 | 0.000001 |
| B0281.4    | B0281.4    | chrII  | 0.436512 | 0.035680 |
| F15A8.5    | dop-1      | chrX   | 0.436349 | 0.024862 |
| M01H9.3    | M01H9.3    | chrIV  | 0.436333 | 0.000000 |
| F08B6.1    | F08B6.1    | chrI   | 0.436126 | 0.000050 |
| T22B7.1    | egl-13     | chrX   | 0.436080 | 0.000015 |
| K09G1.4    | dop-2      | chrV   | 0.436043 | 0.009327 |
| C14C10.6   | C14C10.6   | chrV   | 0.436038 | 0.000035 |
| Y17G9B.8   | Y17G9B.8   | chrIV  | 0.435857 | 0.000009 |
| F52H3.6    | F52H3.6    | chrII  | 0.435451 | 0.024029 |
| R06C7.6    | R06C7.6    | chrI   | 0.435404 | 0.002557 |
| M01D7.6    | emr-1      | chrI   | 0.434997 | 0.000001 |
| F43D9.6    | urm-1      | chrIII | 0.434457 | 0.000026 |
| C09D4.2    | C09D4.2    | chrI   | 0.434323 | 0.000016 |



|             |             |        |          |          |
|-------------|-------------|--------|----------|----------|
| Y47D3A.32   | Y47D3A.32   | chrIII | 0.434243 | 0.004164 |
| Y22D7AL.11  | Y22D7AL.11  | chrIII | 0.434039 | 0.001958 |
| F23F1.1     | nfyc-1      | chrII  | 0.433998 | 0.000001 |
| C08F8.9     | C08F8.9     | chrIV  | 0.433987 | 0.000003 |
| C06A5.4     | C06A5.4     | chrI   | 0.433754 | 0.020869 |
| C23H4.8     | C23H4.8     | chrX   | 0.433477 | 0.004549 |
| D2096.11    | D2096.11    | chrIV  | 0.433389 | 0.004297 |
| T27E9.9     | acc-4       | chrIII | 0.433252 | 0.035900 |
| F39F10.4    | F39F10.4    | chrX   | 0.432937 | 0.002616 |
| Y39A3CR.4   | ddp-1       | chrIII | 0.432926 | 0.000001 |
| C35D10.2    | C35D10.2    | chrIII | 0.432826 | 0.000053 |
| DY3.1       | tin-13      | chrI   | 0.432402 | 0.000001 |
| H10E21.5    | H10E21.5    | chrIII | 0.432382 | 0.002616 |
| ZK616.3     | ZK616.3     | chrIV  | 0.432281 | 0.000039 |
| T05F1.4     | T05F1.4     | chrI   | 0.432221 | 0.000002 |
| T28F2.3     | cah-6       | chrI   | 0.431948 | 0.033608 |
| F08H9.5     | clcc-227    | chrV   | 0.431916 | 0.044365 |
| F49C12.13   | vha-17      | chrIV  | 0.431870 | 0.000001 |
| C44B11.6    | C44B11.6    | chrIII | 0.431830 | 0.005772 |
| Y66D12A.16  | Y66D12A.16  | chrIII | 0.431791 | 0.000008 |
| T27E7.1     | T27E7.1     | chrIV  | 0.431630 | 0.001705 |
| C47D12.4    | C47D12.4    | chrII  | 0.431324 | 0.002467 |
| VM106R.1    | VM106R.1    | chrII  | 0.431150 | 0.005218 |
| B0047.3     | bath-24     | chrII  | 0.431145 | 0.000310 |
| C36B1.7     | dhfr-1      | chrI   | 0.431123 | 0.000001 |
| R12C12.7    | R12C12.7    | chrII  | 0.431100 | 0.000002 |
| M04C9.1     | M04C9.1     | chrI   | 0.431033 | 0.015917 |
| F11A5.9     | F11A5.9     | chrV   | 0.430802 | 0.000005 |
| F43C11.7    | F43C11.7    | chrII  | 0.430552 | 0.000486 |
| M04B2.3     | gfl-1       | chrIV  | 0.430515 | 0.000003 |
| C02B10.2    | C02B10.2    | chrIV  | 0.430457 | 0.000002 |
| F32H2.2     | mdt-31      | chrI   | 0.430302 | 0.000020 |
| F38H4.3     | F38H4.3     | chrIV  | 0.430284 | 0.005814 |
| W05B10.1    | his-74      | chrV   | 0.430017 | 0.000001 |
| K04F10.3    | K04F10.3    | chrI   | 0.430014 | 0.000001 |
| T21C9.4     | T21C9.4     | chrV   | 0.430001 | 0.000001 |
| W04E12.2    | W04E12.2    | chrV   | 0.429810 | 0.002437 |
| F58H1.4     | flr-2       | chrV   | 0.429584 | 0.034468 |
| Y34B4A.11   | Y34B4A.11   | chrX   | 0.429108 | 0.000561 |
| Y73F4A.2    | Y73F4A.2    | chrIV  | 0.429066 | 0.000007 |
| C04E6.7     | C04E6.7     | chrV   | 0.429062 | 0.001590 |
| F59A2.5     | F59A2.5     | chrIII | 0.429005 | 0.000010 |
| B0513.4     | B0513.4     | chrIV  | 0.428926 | 0.000001 |
| R11E3.1     | R11E3.1     | chrIV  | 0.428901 | 0.017810 |
| F52C6.4     | F52C6.4     | chrII  | 0.428732 | 0.018502 |
| F14H3.3     | F14H3.3     | chrV   | 0.428661 | 0.000008 |
| Y73B6BL.269 | Y73B6BL.269 | chrIV  | 0.428604 | 0.014974 |
| ZK1098.6    | ZK1098.6    | chrIII | 0.428418 | 0.038138 |
| Y102A11A.5  | Y102A11A.5  | chrX   | 0.428095 | 0.015331 |
| B0511.13    | B0511.13    | chrI   | 0.428066 | 0.000001 |
| H20E11.3    | H20E11.3    | chrIV  | 0.428023 | 0.000291 |
| C53H9.3     | C53H9.3     | chrI   | 0.428009 | 0.000013 |
| F43H9.4     | F43H9.4     | chrV   | 0.427927 | 0.000182 |
| R186.8      | R186.8      | chrV   | 0.427766 | 0.000012 |
| W03D2.5     | wrt-5       | chrIV  | 0.427698 | 0.000134 |
| Y105E8A.4   | ech-7       | chrI   | 0.427553 | 0.000002 |
| C10C5.7     | C10C5.7     | chrIV  | 0.427330 | 0.040409 |
| C05G5.3     | C05G5.3     | chrX   | 0.426990 | 0.004338 |
| B0273.2     | puf-7       | chrIV  | 0.426986 | 0.000025 |
| Y62H9A.5    | Y62H9A.5    | chrX   | 0.426827 | 0.000001 |
| W05F2.5     | fbxa-203    | chrI   | 0.426635 | 0.000064 |
| ZK250.5     | math-47     | chrII  | 0.426581 | 0.005622 |
| F21D5.6     | F21D5.6     | chrIV  | 0.426517 | 0.000004 |

|            |            |        |          |          |
|------------|------------|--------|----------|----------|
| C33D12.3   | twk-26     | chrX   | 0.426454 | 0.002779 |
| Y57E12AL.5 | mdt-6      | chrV   | 0.426423 | 0.000001 |
| Y47G6A.33  | Y47G6A.33  | chrI   | 0.426396 | 0.000002 |
| B0546.1    | mai-2      | chrIV  | 0.426050 | 0.000001 |
| C07D10.1   | C07D10.1   | chrII  | 0.425823 | 0.044495 |
| T02G5.11   | T02G5.11   | chrII  | 0.425700 | 0.000085 |
| F36H9.4    | F36H9.4    | chrV   | 0.425645 | 0.000165 |
| H19N07.3   | H19N07.3   | chrV   | 0.425579 | 0.000097 |
| Y105E8A.28 | Y105E8A.28 | chrI   | 0.425556 | 0.049548 |
| Y37E3.4    | moag-4     | chrI   | 0.425479 | 0.000003 |
| F12E12.1   | F12E12.1   | chrII  | 0.425354 | 0.000010 |
| W04A8.2    | W04A8.2    | chrI   | 0.425268 | 0.000664 |
| F39B2.5    | F39B2.5    | chrI   | 0.424980 | 0.000015 |
| C13F10.7   | C13F10.7   | chrV   | 0.424742 | 0.000001 |
| Y71F9AL.4  | Y71F9AL.4  | chrI   | 0.424698 | 0.000271 |
| R10D12.12  | R10D12.12  | chrV   | 0.424611 | 0.000009 |
| F23F1.10   | F23F1.10   | chrII  | 0.424553 | 0.000018 |
| CD4.3      | CD4.3      | chrV   | 0.424249 | 0.000005 |
| F18E3.13   | F18E3.13   | chrV   | 0.424219 | 0.000172 |
| F33A8.7    | F33A8.7    | chrII  | 0.424153 | 0.028565 |
| T06A10.2   | T06A10.2   | chrIV  | 0.424002 | 0.000009 |
| F07D3.2    | flp-6      | chrV   | 0.423767 | 0.000018 |
| R09A8.5    | R09A8.5    | chrX   | 0.423762 | 0.010022 |
| C18A11.3   | C18A11.3   | chrX   | 0.423726 | 0.000065 |
| Y71F9B.1   | Y71F9B.1   | chrI   | 0.423676 | 0.000145 |
| T27F6.8    | T27F6.8    | chrI   | 0.423646 | 0.002651 |
| F39E9.10   | F39E9.10   | chrII  | 0.423548 | 0.002274 |
| Y46G5A.10  | cnp-2      | chrII  | 0.423457 | 0.000181 |
| Y62E10A.19 | Y62E10A.19 | chrIV  | 0.423364 | 0.004765 |
| Y43F8A.5   | Y43F8A.5   | chrV   | 0.423230 | 0.027220 |
| B0495.6    | B0495.6    | chrII  | 0.422993 | 0.000012 |
| ZK682.5    | ZK682.5    | chrV   | 0.422982 | 0.013901 |
| F15D4.2    | F15D4.2    | chrII  | 0.422859 | 0.000007 |
| ZK337.2    | ZK337.2    | chrI   | 0.422213 | 0.013671 |
| C29F5.7    | glb-10     | chrII  | 0.421975 | 0.025949 |
| F09F9.1    | F09F9.1    | chrX   | 0.421903 | 0.015662 |
| T02G6.10   | T02G6.10   | chrI   | 0.421851 | 0.030447 |
| W09G12.4   | dsl-1      | chrIV  | 0.421844 | 0.004267 |
| F10E9.12   | F10E9.12   | chrIII | 0.421730 | 0.013268 |
| T07A9.15   | T07A9.15   | chrIV  | 0.421591 | 0.000152 |
| Y54G2A.19  | Y54G2A.19  | chrIV  | 0.421385 | 0.000282 |
| C41D11.9   | C41D11.9   | chrI   | 0.421376 | 0.000021 |
| T08A9.7    | spp-3      | chrX   | 0.421323 | 0.000001 |
| Y37D8A.21  | Y37D8A.21  | chrIII | 0.421213 | 0.000003 |
| F09E5.13   | agt-2      | chrII  | 0.420846 | 0.000004 |
| F09D12.1   | grd-10     | chrIV  | 0.420823 | 0.000143 |
| Y55F3AM.8  | immp-2     | chrIV  | 0.420792 | 0.000050 |
| C02B8.5    | C02B8.5    | chrX   | 0.420686 | 0.034494 |
| Y51F10.6   | Y51F10.6   | chrI   | 0.420447 | 0.000027 |
| Y38H6C.10  | fbxa-149   | chrV   | 0.420216 | 0.002278 |
| C29H12.3   | rgs-3      | chrII  | 0.420146 | 0.040243 |
| C34F6.1    | C34F6.1    | chrX   | 0.420114 | 0.044118 |
| C28A5.2    | C28A5.2    | chrIII | 0.420087 | 0.000005 |
| ZK1010.5   | ZK1010.5   | chrIII | 0.419897 | 0.032287 |
| F23F12.4   | sdz-15     | chrIII | 0.419706 | 0.033991 |
| T08A9.3    | sng-1      | chrX   | 0.419700 | 0.022055 |
| F07A5.5    | sue-1      | chrI   | 0.419641 | 0.006812 |
| F53F10.3   | F53F10.3   | chrI   | 0.419589 | 0.000003 |
| F41B4.3    | F41B4.3    | chrX   | 0.419390 | 0.017182 |
| B0286.3    | B0286.3    | chrII  | 0.419322 | 0.000003 |
| C05D12.4   | C05D12.4   | chrII  | 0.419319 | 0.000419 |
| E02H4.7    | E02H4.7    | chrX   | 0.419111 | 0.000236 |
| Y50D4B.3   | Y50D4B.3   | chrV   | 0.419067 | 0.000018 |

|            |            |        |          |          |
|------------|------------|--------|----------|----------|
| F55C12.4   | F55C12.4   | chrII  | 0.418948 | 0.016929 |
| ZC410.5    | ZC410.5    | chrIV  | 0.418939 | 0.000017 |
| Y41D4B.7   | nhr-87     | chrIV  | 0.418684 | 0.004385 |
| E02A10.3   | E02A10.3   | chrV   | 0.418592 | 0.011334 |
| K08B4.7    | K08B4.7    | chrIV  | 0.418585 | 0.047492 |
| T04A6.1    | T04A6.1    | chrIII | 0.418411 | 0.000413 |
| C47B2.9    | C47B2.9    | chrI   | 0.418380 | 0.000025 |
| Y37E11B.1  | Y37E11B.1  | chrIV  | 0.418290 | 0.007436 |
| Y73B6BL.44 | Y73B6BL.44 | chrIV  | 0.418263 | 0.002777 |
| B0035.18   | B0035.18   | chrIV  | 0.418005 | 0.000023 |
| ZK287.5    | rbx-1      | chrV   | 0.417844 | 0.000001 |
| F39E9.7    | F39E9.7    | chrII  | 0.417672 | 0.026351 |
| F57B10.10  | dad-1      | chrI   | 0.417577 | 0.000001 |
| W03F8.6    | W03F8.6    | chrIV  | 0.417462 | 0.026246 |
| W05F2.3    | W05F2.3    | chrI   | 0.417377 | 0.000001 |
| Y87G2A.18  | Y87G2A.18  | chrI   | 0.417248 | 0.000013 |
| Y48G8AL.7  | Y48G8AL.7  | chrI   | 0.417192 | 0.000036 |
| W09G3.3    | tag-229    | chrI   | 0.417029 | 0.000020 |
| B0244.10   | B0244.10   | chrIII | 0.416990 | 0.005294 |
| F07H5.9    | pho-13     | chrII  | 0.416927 | 0.000010 |
| R09E10.6   | R09E10.6   | chrIV  | 0.416902 | 0.000051 |
| C05D11.6   | nas-4      | chrIII | 0.416802 | 0.044861 |
| Y48A5A.3   | Y48A5A.3   | chrIV  | 0.416229 | 0.000149 |
| F14D7.6    | F14D7.6    | chrV   | 0.416205 | 0.000153 |
| F55A11.8   | F55A11.8   | chrV   | 0.416036 | 0.000010 |
| Y97E10AR.5 | rpb-9      | chrV   | 0.415996 | 0.000004 |
| F46G10.1   | F46G10.1   | chrX   | 0.415750 | 0.000009 |
| C16A11.5   | C16A11.5   | chrII  | 0.415734 | 0.000006 |
| C10A4.5    | C10A4.5    | chrX   | 0.415733 | 0.036512 |
| Y65B4BR.8  | Y65B4BR.8  | chrI   | 0.415730 | 0.000004 |
| K03B4.7    | cpg-8      | chrV   | 0.415715 | 0.000002 |
| T06C12.5   | T06C12.5   | chrV   | 0.415653 | 0.001595 |
| C15H11.8   | C15H11.8   | chrV   | 0.415635 | 0.000012 |
| F45G2.8    | F45G2.8    | chrIII | 0.415191 | 0.000010 |
| W04E12.6   | clec-49    | chrV   | 0.415099 | 0.000125 |
| D1014.1    | sul-2      | chrV   | 0.415065 | 0.049345 |
| C02F12.5   | C02F12.5   | chrX   | 0.415058 | 0.000047 |
| F52B11.4   | col-133    | chrIV  | 0.415013 | 0.000004 |
| R09B5.5    | pqn-54     | chrV   | 0.414987 | 0.006770 |
| T06E6.10   | T06E6.10   | chrV   | 0.414970 | 0.000149 |
| C28C12.2   | mesp-1     | chrIV  | 0.414777 | 0.000001 |
| T19C4.6    | gpa-1      | chrV   | 0.414777 | 0.007571 |
| Y71H2B.4   | Y71H2B.4   | chrIII | 0.414769 | 0.000007 |
| C47F8.1    | C47F8.1    | chrI   | 0.414766 | 0.001340 |
| F25H9.7    | F25H9.7    | chrV   | 0.414708 | 0.000065 |
| F36A2.10   | F36A2.10   | chrI   | 0.414667 | 0.007722 |
| F13B6.3    | F13B6.3    | chrIV  | 0.414586 | 0.002440 |
| F19G12.9   | F19G12.9   | chrX   | 0.414161 | 0.044064 |
| Y60A3A.9   | Y60A3A.9   | chrV   | 0.414058 | 0.000003 |
| C33F10.11  | C33F10.11  | chrII  | 0.413914 | 0.038818 |
| F38H4.5    | F38H4.5    | chrIV  | 0.413633 | 0.036677 |
| T25G12.3   | T25G12.3   | chrX   | 0.413553 | 0.001290 |
| C08H9.15   | C08H9.15   | chrII  | 0.413526 | 0.000021 |
| CD4.10     | CD4.10     | chrV   | 0.413498 | 0.000078 |
| T12A2.3    | T12A2.3    | chrIII | 0.413374 | 0.004850 |
| C52D10.9   | skr-8      | chrIV  | 0.413319 | 0.000386 |
| T23G7.5    | pir-1      | chrII  | 0.413142 | 0.000003 |
| W03G11.3   | W03G11.3   | chrX   | 0.413134 | 0.000281 |
| M106.7     | M106.7     | chrII  | 0.413023 | 0.000017 |
| Y106G6H.15 | Y106G6H.15 | chrI   | 0.412708 | 0.000005 |
| K11H3.6    | K11H3.6    | chrIII | 0.412631 | 0.000015 |
| K05F1.10   | K05F1.10   | chrII  | 0.412598 | 0.000391 |
| F54C4.1    | F54C4.1    | chrIII | 0.412591 | 0.000005 |

|            |           |        |          |          |
|------------|-----------|--------|----------|----------|
| C25H3.12   | C25H3.12  | chrII  | 0.412551 | 0.000125 |
| C31C9.7    | C31C9.7   | chrII  | 0.412547 | 0.003158 |
| C01G8.4    | dnj-4     | chrI   | 0.412457 | 0.000019 |
| Y66C5A.1   | Y66C5A.1  | chrX   | 0.412216 | 0.023016 |
| C53B7.4    | asg-2     | chrX   | 0.411851 | 0.000002 |
| ZK867.3    | spp-22    | chrX   | 0.411811 | 0.013936 |
| T09A5.15   | T09A5.15  | chrII  | 0.411705 | 0.000063 |
| F57B10.14  | F57B10.14 | chrI   | 0.411678 | 0.000002 |
| K08H10.9   | K08H10.9  | chrV   | 0.411666 | 0.000016 |
| D1086.4    | him-5     | chrV   | 0.411324 | 0.000030 |
| T08A9.11   | ttr-59    | chrX   | 0.411074 | 0.000052 |
| Y66D12A.7  | Y66D12A.7 | chrIII | 0.410874 | 0.000068 |
| Y48C3A.18  | Y48C3A.18 | chrII  | 0.410661 | 0.000079 |
| F08G12.4   | vhl-1     | chrX   | 0.410497 | 0.000554 |
| C30B5.5    | C30B5.5   | chrII  | 0.410338 | 0.030596 |
| Y54G2A.41  | Y54G2A.41 | chrIV  | 0.410318 | 0.009294 |
| Y45F10A.5  | nlp-17    | chrIV  | 0.410283 | 0.003649 |
| T07D10.8   | T07D10.8  | chrI   | 0.410219 | 0.004080 |
| ZK678.5    | wrt-4     | chrX   | 0.410089 | 0.018490 |
| T26A5.8    | T26A5.8   | chrIII | 0.410056 | 0.000007 |
| R10D12.1   | R10D12.1  | chrV   | 0.409943 | 0.012211 |
| F40F4.4    | lbp-3     | chrX   | 0.409783 | 0.000007 |
| W03F9.2    | W03F9.2   | chrV   | 0.409772 | 0.000045 |
| T20G5.10   | T20G5.10  | chrIII | 0.409658 | 0.000022 |
| F44E2.6    | F44E2.6   | chrIII | 0.409421 | 0.000024 |
| Y54G2A.11  | Y54G2A.11 | chrIV  | 0.409365 | 0.000031 |
| Y48B6A.14  | hmg-1.1   | chrII  | 0.409336 | 0.000002 |
| Y116A8C.17 | dct-13    | chrIV  | 0.408969 | 0.013607 |
| F53F1.4    | F53F1.4   | chrV   | 0.408879 | 0.000004 |
| Y46G5A.8   | Y46G5A.8  | chrII  | 0.408753 | 0.001064 |
| T27C4.1    | T27C4.1   | chrV   | 0.408707 | 0.000042 |
| T04A8.4    | tag-243   | chrIII | 0.408671 | 0.011169 |
| H36L18.2   | H36L18.2  | chrX   | 0.408534 | 0.000006 |
| F47B10.9   | F47B10.9  | chrX   | 0.408497 | 0.000165 |
| F26F4.9    | F26F4.9   | chrIII | 0.408370 | 0.000015 |
| W07E6.3    | W07E6.3   | chrII  | 0.408290 | 0.043736 |
| F59H6.10   | bath-3    | chrII  | 0.408221 | 0.002653 |
| T10B11.5   | T10B11.5  | chrI   | 0.408189 | 0.009254 |
| F48C1.7    | spe-11    | chrI   | 0.408036 | 0.022049 |
| F11C7.5    | osm-11    | chrX   | 0.407882 | 0.000002 |
| T04A8.10   | sel-13    | chrIII | 0.407722 | 0.000007 |
| E03G2.4    | col-186   | chrX   | 0.407688 | 0.038340 |
| C05D12.2   | C05D12.2  | chrII  | 0.407451 | 0.006528 |
| F35A5.3    | abu-10    | chrX   | 0.407149 | 0.008268 |
| ZK632.8    | arl-5     | chrIII | 0.407027 | 0.000028 |
| T27F6.4    | T27F6.4   | chrI   | 0.406951 | 0.000003 |
| Y6B3B.5    | Y6B3B.5   | chrI   | 0.406881 | 0.000093 |
| Y39D8A.1   | Y39D8A.1  | chrV   | 0.406844 | 0.000363 |
| C33G3.3    | lgc-21    | chrX   | 0.406761 | 0.011463 |
| K05F6.5    | fbxb-44   | chrII  | 0.406580 | 0.041240 |
| C49H3.3    | C49H3.3   | chrIV  | 0.406464 | 0.000004 |
| F26F4.13   | kbp-2     | chrIII | 0.406253 | 0.000014 |
| C49F5.3    | C49F5.3   | chrX   | 0.406202 | 0.000033 |
| C50D2.5    | C50D2.5   | chrII  | 0.405770 | 0.000005 |
| R11D1.10   | R11D1.10  | chrV   | 0.405654 | 0.000015 |
| C06E1.3    | C06E1.3   | chrIII | 0.405646 | 0.000464 |
| Y41D4B.5   | rps-28    | chrIV  | 0.405453 | 0.000002 |
| ZK836.1    | lon-3     | chrV   | 0.405438 | 0.002617 |
| M05D6.6    | M05D6.6   | chrII  | 0.405323 | 0.000008 |
| C44B7.5    | C44B7.5   | chrII  | 0.405313 | 0.000003 |
| F18E3.11   | F18E3.11  | chrV   | 0.405214 | 0.000276 |
| T28A8.8    | T28A8.8   | chrIII | 0.405020 | 0.002654 |
| Y48E1C.4   | Y48E1C.4  | chrII  | 0.404938 | 0.000024 |

|            |            |        |          |          |
|------------|------------|--------|----------|----------|
| R11G11.12  | nhr-210    | chrV   | 0.404844 | 0.012409 |
| T07D4.2    | T07D4.2    | chrII  | 0.404666 | 0.001021 |
| C26F1.1    | C26F1.1    | chrV   | 0.404566 | 0.001234 |
| ZK632.10   | ZK632.10   | chrIII | 0.404293 | 0.000004 |
| C42C1.13   | C42C1.13   | chrIV  | 0.404174 | 0.000033 |
| C01G12.4   | C01G12.4   | chrII  | 0.404090 | 0.006145 |
| T21C12.3   | T21C12.3   | chrIII | 0.404064 | 0.033638 |
| C30A5.3    | C30A5.3    | chrIII | 0.403967 | 0.000003 |
| R13D7.7    | gst-41     | chrV   | 0.403797 | 0.006526 |
| Y57A10A.14 | Y57A10A.14 | chrII  | 0.403719 | 0.005494 |
| T10H10.2   | T10H10.2   | chrX   | 0.403432 | 0.000511 |
| C41D11.5   | C41D11.5   | chrI   | 0.403395 | 0.000005 |
| C10F3.5    | pcm-1      | chrV   | 0.403389 | 0.000104 |
| ZC168.6    | ZC168.6    | chrIV  | 0.403075 | 0.008083 |
| M04C9.4    | M04C9.4    | chrI   | 0.403008 | 0.009920 |
| T28F2.2    | T28F2.2    | chrI   | 0.402967 | 0.000898 |
| F11G11.5   | F11G11.5   | chrII  | 0.402947 | 0.000005 |
| E04F6.8    | E04F6.8    | chrII  | 0.402929 | 0.000035 |
| F19C7.8    | F19C7.8    | chrIV  | 0.402759 | 0.030596 |
| R10E9.3    | R10E9.3    | chrIII | 0.402690 | 0.045989 |
| Y69A2AR.6  | Y69A2AR.6  | chrIV  | 0.402570 | 0.000058 |
| C08H9.16   | C08H9.16   | chrII  | 0.402517 | 0.000008 |
| T12F5.1    | T12F5.1    | chrI   | 0.402406 | 0.000009 |
| F13G11.3   | F13G11.3   | chrIV  | 0.402238 | 0.000008 |
| Y45F10D.10 | Y45F10D.10 | chrIV  | 0.402215 | 0.010192 |
| Y34D9A.6   | glrx-10    | chrI   | 0.402181 | 0.000014 |
| Y57E12AM.1 | Y57E12AM.1 | chrV   | 0.402116 | 0.000006 |
| Y44E3A.3   | Y44E3A.3   | chrI   | 0.402060 | 0.000020 |
| C33E10.2   | fbxa-120   | chrX   | 0.402013 | 0.003114 |
| T23F2.3    | T23F2.3    | chrX   | 0.401608 | 0.000273 |
| C08G5.4    | snt-6      | chrII  | 0.401498 | 0.027009 |
| C08F8.6    | C08F8.6    | chrIV  | 0.401486 | 0.037330 |
| H10E21.1   | H10E21.1   | chrIII | 0.401346 | 0.001372 |
| K07G5.2    | xpa-1      | chrI   | 0.401259 | 0.000009 |
| F15D4.8    | flp-16     | chrII  | 0.401018 | 0.004294 |
| C34D1.4    | C34D1.4    | chrV   | 0.400868 | 0.007158 |
| Y53F4B.3   | Y53F4B.3   | chrII  | 0.400599 | 0.000012 |
| F59G1.4    | F59G1.4    | chrII  | 0.400450 | 0.049709 |
| D2085.2    | atg-10     | chrII  | 0.400448 | 0.017180 |
| B0416.3    | B0416.3    | chrX   | 0.400425 | 0.036104 |
| T28D6.9    | pen-2      | chrIII | 0.400404 | 0.000028 |
| H11E01.2   | H11E01.2   | chrX   | 0.400229 | 0.003022 |
| B0261.6    | B0261.6    | chrI   | 0.399776 | 0.019549 |
| F18A1.8    | F18A1.8    | chrII  | 0.399761 | 0.000040 |
| Y41C4A.19  | col-96     | chrIII | 0.399715 | 0.000038 |
| Y37E3.3    | rpb-10     | chrI   | 0.399465 | 0.000009 |
| F10C2.2    | kup-1      | chrV   | 0.399296 | 0.000005 |
| K03B4.4    | K03B4.4    | chrV   | 0.399159 | 0.026102 |
| K03H1.4    | ttr-2      | chrIII | 0.399155 | 0.000005 |
| R08D7.5    | R08D7.5    | chrIII | 0.398926 | 0.000020 |
| T21B10.6   | cutl-15    | chrII  | 0.398535 | 0.009776 |
| Y73B6BL.30 | Y73B6BL.30 | chrIV  | 0.398304 | 0.000014 |
| B0286.1    | B0286.1    | chrII  | 0.398153 | 0.000692 |
| Y44A6D.2   | Y44A6D.2   | chrV   | 0.398131 | 0.002105 |
| B0334.4    | B0334.4    | chrII  | 0.398069 | 0.000006 |
| C09E9.1    | C09E9.1    | chrIV  | 0.398061 | 0.000039 |
| F53F4.16   | F53F4.16   | chrV   | 0.397735 | 0.000106 |
| Y71G12B.35 | Y71G12B.35 | chrI   | 0.397717 | 0.004333 |
| T08B1.4    | T08B1.4    | chrV   | 0.397586 | 0.015569 |
| C55A6.1    | C55A6.1    | chrV   | 0.397455 | 0.000006 |
| T13C5.6    | T13C5.6    | chrX   | 0.397347 | 0.000628 |
| Y51A2D.21  | Y51A2D.21  | chrV   | 0.397063 | 0.033891 |
| Y54G9A.5   | Y54G9A.5   | chrII  | 0.396375 | 0.000012 |

|            |            |        |          |          |
|------------|------------|--------|----------|----------|
| H01G02.1   | H01G02.1   | chrIV  | 0.396291 | 0.000089 |
| W02H5.1    | W02H5.1    | chrV   | 0.396226 | 0.000392 |
| C34C12.4   | C34C12.4   | chrIII | 0.396205 | 0.000028 |
| Y42G9A.3   | Y42G9A.3   | chrIII | 0.396198 | 0.000605 |
| Y67D8C.8   | cpg-9      | chrIV  | 0.396137 | 0.000010 |
| F22F7.7    | F22F7.7    | chrV   | 0.396123 | 0.000206 |
| M01E5.2    | M01E5.2    | chrI   | 0.395957 | 0.000102 |
| F39G3.8    | tig-2      | chrV   | 0.395924 | 0.001831 |
| F35F10.1   | F35F10.1   | chrV   | 0.395793 | 0.030596 |
| F23F12.12  | F23F12.12  | chrIII | 0.395601 | 0.001182 |
| W10C8.4    | W10C8.4    | chrI   | 0.395588 | 0.043205 |
| F37C12.4   | rpl-36     | chrIII | 0.395475 | 0.000004 |
| C32E8.3    | C32E8.3    | chrI   | 0.395441 | 0.000014 |
| ZK20.4     | ZK20.4     | chrII  | 0.395362 | 0.000014 |
| C56C10.9   | C56C10.9   | chrII  | 0.395318 | 0.000016 |
| F58A3.5    | ttr-31     | chrX   | 0.395254 | 0.000073 |
| F07B10.1   | clin-3.1   | chrV   | 0.395245 | 0.000306 |
| F11A10.8   | cpsf-4     | chrIV  | 0.395131 | 0.000007 |
| Y32H12A.6  | Y32H12A.6  | chrIII | 0.395051 | 0.000464 |
| F43D2.4    | hot-1      | chrV   | 0.394888 | 0.009516 |
| Y43F4B.10  | Y43F4B.10  | chrIII | 0.394826 | 0.000015 |
| F10G7.11   | ttr-41     | chrII  | 0.394741 | 0.000011 |
| T05F1.3    | rps-19     | chrI   | 0.394727 | 0.000004 |
| F08F3.6    | F08F3.6    | chrV   | 0.394424 | 0.000008 |
| C18E9.5    | C18E9.5    | chrII  | 0.394294 | 0.000053 |
| R13A5.6    | ttr-8      | chrIII | 0.394113 | 0.001028 |
| K07A1.1    | K07A1.1    | chrI   | 0.394040 | 0.000012 |
| F45F2.9    | F45F2.9    | chrV   | 0.394016 | 0.000044 |
| Y71H2AM.12 | Y71H2AM.12 | chrIII | 0.393911 | 0.006963 |
| F23F12.9   | F23F12.9   | chrIII | 0.393791 | 0.000020 |
| Y37B11A.3  | Y37B11A.3  | chrIII | 0.393768 | 0.005088 |
| R03G5.5    | R03G5.5    | chrX   | 0.393627 | 0.004189 |
| Y71H2B.11  | Y71H2B.11  | chrIII | 0.393414 | 0.000259 |
| F40F4.2    | lbp-2      | chrX   | 0.393218 | 0.000005 |
| K07E3.3    | dao-3      | chrX   | 0.393172 | 0.000012 |
| C36H8.1    | C36H8.1    | chrIV  | 0.393099 | 0.022488 |
| B0213.3    | nlp-28     | chrV   | 0.392988 | 0.000033 |
| Y82E9BR.2  | Y82E9BR.2  | chrIII | 0.392921 | 0.000042 |
| F02A9.3    | far-2      | chrIII | 0.392862 | 0.000004 |
| C38D4.1    | C38D4.1    | chrIII | 0.392800 | 0.024625 |
| D2007.4    | D2007.4    | chrIII | 0.392550 | 0.000014 |
| C33B4.4    | C33B4.4    | chrII  | 0.392512 | 0.000224 |
| C35B1.5    | C35B1.5    | chrIV  | 0.392503 | 0.000009 |
| ZK180.6    | ZK180.6    | chrIV  | 0.392384 | 0.000312 |
| W03D8.9    | W03D8.9    | chrI   | 0.392156 | 0.047719 |
| C14A6.1    | clec-48    | chrV   | 0.392103 | 0.000028 |
| F07H5.8    | F07H5.8    | chrII  | 0.392024 | 0.048111 |
| F43C1.3    | F43C1.3    | chrIII | 0.391726 | 0.000062 |
| Y57A10A.16 | Y57A10A.16 | chrII  | 0.391706 | 0.000083 |
| F33C8.3    | tsp-8      | chrX   | 0.391505 | 0.000091 |
| B0035.15   | B0035.15   | chrIV  | 0.391446 | 0.000016 |
| ZK652.2    | tomm-7     | chrIII | 0.391415 | 0.000049 |
| B0213.15   | cyp-34A9   | chrV   | 0.391383 | 0.024313 |
| F57H12.7   | mec-17     | chrIV  | 0.391265 | 0.000477 |
| Y71F9B.4   | snr-7      | chrI   | 0.391230 | 0.000009 |
| R10H10.6   | R10H10.6   | chrIV  | 0.391161 | 0.000331 |
| T08E11.6   | fbxb-10    | chrII  | 0.390879 | 0.014865 |
| T09A5.5    | T09A5.5    | chrII  | 0.390771 | 0.000018 |
| C52E4.2    | mif-2      | chrV   | 0.390721 | 0.000033 |
| F47G3.2    | asna-2     | chrX   | 0.390573 | 0.004196 |
| Y57A10A.9  | tag-276    | chrII  | 0.390543 | 0.000554 |
| CD4.4      | vps-37     | chrV   | 0.390534 | 0.000017 |
| T13F3.6    | T13F3.6    | chrV   | 0.390386 | 0.000010 |

|             |             |        |          |          |
|-------------|-------------|--------|----------|----------|
| D1046.4     | D1046.4     | chrIV  | 0.390292 | 0.011502 |
| T04C12.11   | T04C12.11   | chrV   | 0.390285 | 0.000267 |
| Y47H10A.5   | Y47H10A.5   | chrI   | 0.390032 | 0.021186 |
| Y48G8AL.9   | Y48G8AL.9   | chrI   | 0.389789 | 0.000033 |
| Y15E3A.5    | Y15E3A.5    | chrX   | 0.389669 | 0.002028 |
| F39E9.11    | btb-17      | chrII  | 0.389620 | 0.024939 |
| F35F10.6    | F35F10.6    | chrV   | 0.389562 | 0.038184 |
| K06A4.7     | K06A4.7     | chrV   | 0.389440 | 0.000013 |
| F49C12.11   | F49C12.11   | chrIV  | 0.389424 | 0.000007 |
| T26H2.9     | nhr-79      | chrV   | 0.389302 | 0.005116 |
| Y48E1B.9    | clcc-146    | chrII  | 0.389198 | 0.000155 |
| F28E10.2    | F28E10.2    | chrIV  | 0.389192 | 0.005692 |
| F44G3.2     | F44G3.2     | chrV   | 0.389174 | 0.000008 |
| R05D11.5    | R05D11.5    | chrI   | 0.389027 | 0.000019 |
| T04G9.7     | T04G9.7     | chrX   | 0.388913 | 0.000010 |
| C06B8.8     | rpl-38      | chrV   | 0.388616 | 0.000006 |
| C29G2.6     | C29G2.6     | chrV   | 0.388521 | 0.000091 |
| W08D2.1     | egl-20      | chrIV  | 0.388512 | 0.004313 |
| F01F1.2     | F01F1.2     | chrIII | 0.388356 | 0.000017 |
| F25H5.8     | F25H5.8     | chrI   | 0.388166 | 0.000148 |
| C33C12.9    | C33C12.9    | chrII  | 0.388075 | 0.000334 |
| F08B6.2     | gpc-2       | chrI   | 0.388051 | 0.000015 |
| F22E5.17    | F22E5.17    | chrII  | 0.387939 | 0.000033 |
| C33A12.7    | C33A12.7    | chrIV  | 0.387735 | 0.000693 |
| R10H10.1    | lpd-8       | chrIV  | 0.387540 | 0.000012 |
| R01E6.6     | glb-20      | chrX   | 0.387481 | 0.041240 |
| ZK1098.7    | ZK1098.7    | chrIII | 0.387475 | 0.000038 |
| ZK652.11    | cuc-1       | chrIII | 0.387429 | 0.000033 |
| K02B7.3     | K02B7.3     | chrII  | 0.387422 | 0.000097 |
| F58A4.9     | F58A4.9     | chrIII | 0.387231 | 0.000018 |
| K08D10.2    | dnj-15      | chrIV  | 0.387178 | 0.000033 |
| T05H4.12    | atp-4       | chrV   | 0.387109 | 0.000008 |
| C39E9.4     | scl-6       | chrIV  | 0.387010 | 0.002740 |
| C14B9.10    | C14B9.10    | chrIII | 0.386916 | 0.000009 |
| R01E6.3     | cah-4       | chrX   | 0.386869 | 0.000010 |
| F10E7.7     | rpl-33      | chrII  | 0.386702 | 0.000007 |
| F45B8.5     | F45B8.5     | chrX   | 0.386430 | 0.018891 |
| Y73F8A.13   | Y73F8A.13   | chrIV  | 0.386421 | 0.001669 |
| D1086.17    | D1086.17    | chrV   | 0.386345 | 0.021668 |
| B0024.2     | col-150     | chrV   | 0.386303 | 0.000218 |
| Y43C5A.1    | nspd-7      | chrIV  | 0.386285 | 0.004074 |
| Y48G8AL.15  | Y48G8AL.15  | chrI   | 0.386247 | 0.000568 |
| T10G3.6     | gut-2       | chrV   | 0.386159 | 0.000025 |
| F44D12.2    | F44D12.2    | chrIV  | 0.386034 | 0.000971 |
| T06A10.3    | T06A10.3    | chrIV  | 0.385859 | 0.000025 |
| F47G6.1     | dyb-1       | chrI   | 0.385850 | 0.000125 |
| F22A3.7     | ttr-36      | chrX   | 0.385770 | 0.000125 |
| Y71F9B.13   | Y71F9B.13   | chrI   | 0.385543 | 0.000214 |
| F37C12.11   | rps-21      | chrIII | 0.385453 | 0.000007 |
| R166.3      | R166.3      | chrII  | 0.385417 | 0.000149 |
| ZC239.20    | ZC239.20    | chrII  | 0.385279 | 0.046554 |
| Y39G10AR.20 | Y39G10AR.20 | chrI   | 0.385218 | 0.000033 |
| F07C3.2     | F07C3.2     | chrV   | 0.384995 | 0.009661 |
| F52C6.3     | F52C6.3     | chrII  | 0.384944 | 0.014547 |
| ZC116.2     | cyc-2.2     | chrV   | 0.384794 | 0.018891 |
| C39B5.5     | C39B5.5     | chrIII | 0.384616 | 0.000334 |
| C06A1.3     | C06A1.3     | chrII  | 0.384604 | 0.043723 |
| Y53F4B.30   | gst-27      | chrII  | 0.384506 | 0.000018 |
| F42H10.6    | F42H10.6    | chrIII | 0.384061 | 0.000170 |
| Y50D4A.2    | Y50D4A.2    | chrV   | 0.383968 | 0.000061 |
| T12D8.7     | taf-9       | chrIII | 0.383946 | 0.000021 |
| F47B10.5    | F47B10.5    | chrX   | 0.383828 | 0.016544 |
| F15A2.1     | col-184     | chrX   | 0.383689 | 0.000008 |

|             |             |        |          |          |
|-------------|-------------|--------|----------|----------|
| C09H10.2    | rpl-41      | chrII  | 0.383481 | 0.000008 |
| Y46G5A.35   | Y46G5A.35   | chrII  | 0.383426 | 0.000233 |
| B0513.3     | rpl-29      | chrIV  | 0.383357 | 0.000008 |
| Y56A3A.33   | Y56A3A.33   | chrIII | 0.383314 | 0.003207 |
| ZK507.4     | dos-1       | chrIII | 0.383197 | 0.000351 |
| ZK813.7     | ZK813.7     | chrX   | 0.383064 | 0.000009 |
| C29E4.1     | col-90      | chrIII | 0.383000 | 0.011448 |
| C56C10.7    | C56C10.7    | chrII  | 0.382667 | 0.000029 |
| R10E4.7     | R10E4.7     | chrIII | 0.382454 | 0.013914 |
| Y71H2AR.3   | Y71H2AR.3   | chrIII | 0.382295 | 0.004109 |
| B0205.8     | B0205.8     | chrI   | 0.382291 | 0.000050 |
| C24A3.2     | C24A3.2     | chrX   | 0.382258 | 0.000080 |
| K07B1.6     | K07B1.6     | chrV   | 0.382190 | 0.000013 |
| C28H8.1     | C28H8.1     | chrIII | 0.382177 | 0.000026 |
| C02F5.7     | C02F5.7     | chrIII | 0.382151 | 0.000083 |
| T21B10.5    | set-17      | chrII  | 0.381829 | 0.000016 |
| C49C3.6     | C49C3.6     | chrIV  | 0.381820 | 0.000021 |
| C14B1.2     | C14B1.2     | chrIII | 0.381483 | 0.000015 |
| Y57A10A.3   | Y57A10A.3   | chrII  | 0.381459 | 0.002523 |
| F28F8.5     | F28F8.5     | chrV   | 0.381313 | 0.000034 |
| Y54F10AM.11 | Y54F10AM.11 | chrIII | 0.381228 | 0.000042 |
| Y46G5A.5    | pis-y-1     | chrII  | 0.381081 | 0.000017 |
| W03D2.1     | pqn-75      | chrIV  | 0.381073 | 0.001607 |
| T12B5.15    | T12B5.15    | chrIII | 0.380858 | 0.000041 |
| M03C11.6    | M03C11.6    | chrIII | 0.380837 | 0.000492 |
| C39E9.2     | scl-5       | chrIV  | 0.380642 | 0.002142 |
| F35C12.2    | ncx-4       | chrI   | 0.380562 | 0.037909 |
| F37A8.4     | nlp-10      | chrIII | 0.380460 | 0.000971 |
| H10D18.5    | H10D18.5    | chrV   | 0.380320 | 0.017486 |
| F43C11.3    | F43C11.3    | chrII  | 0.380266 | 0.031226 |
| K08H2.3     | K08H2.3     | chrX   | 0.380165 | 0.000486 |
| Y69A2AR.32  | Y69A2AR.32  | chrIV  | 0.380103 | 0.000234 |
| Y17D7B.4    | Y17D7B.4    | chrV   | 0.379856 | 0.000551 |
| ZK662.2     | ZK662.2     | chrX   | 0.379508 | 0.025529 |
| T07F12.4    | T07F12.4    | chrX   | 0.379432 | 0.024960 |
| ZK856.5     | ZK856.5     | chrV   | 0.379376 | 0.005899 |
| B0513.2     | B0513.2     | chrIV  | 0.379317 | 0.000018 |
| F54H5.5     | F54H5.5     | chrII  | 0.378987 | 0.040485 |
| B0025.4     | B0025.4     | chrI   | 0.378982 | 0.000041 |
| K10G9.2     | K10G9.2     | chrIII | 0.378717 | 0.008734 |
| Y74C10AL.2  | Y74C10AL.2  | chrI   | 0.378587 | 0.000057 |
| F49C12.6    | F49C12.6    | chrIV  | 0.378564 | 0.024826 |
| Y72A10A.1   | Y72A10A.1   | chrX   | 0.378555 | 0.019866 |
| C24D10.4    | C24D10.4    | chrIV  | 0.378539 | 0.000030 |
| R17.1       | fbxb-85     | chrIII | 0.378511 | 0.042851 |
| C37A2.7     | C37A2.7     | chrI   | 0.378463 | 0.000011 |
| T23H2.2     | snt-4       | chrI   | 0.378305 | 0.000153 |
| C25E10.8    | C25E10.8    | chrV   | 0.378303 | 0.001131 |
| F23C8.9     | F23C8.9     | chrI   | 0.378227 | 0.000041 |
| R02F2.9     | R02F2.9     | chrIII | 0.378184 | 0.000050 |
| F30A10.1    | F30A10.1    | chrI   | 0.378151 | 0.001286 |
| T12B5.8     | fbxa-59     | chrIII | 0.378024 | 0.013053 |
| R02D5.3     | R02D5.3     | chrV   | 0.377641 | 0.028542 |
| T01G1.2     | T01G1.2     | chrIV  | 0.377302 | 0.005224 |
| R53.6       | R53.6       | chrII  | 0.377176 | 0.000025 |
| F37B12.3    | F37B12.3    | chrII  | 0.377141 | 0.000022 |
| F02D10.6    | F02D10.6    | chrX   | 0.377102 | 0.003429 |
| T05A7.1     | T05A7.1     | chrII  | 0.376953 | 0.000075 |
| Y106G6D.8   | Y106G6D.8   | chrI   | 0.376950 | 0.000494 |
| F41E7.5     | fipr-21     | chrX   | 0.376823 | 0.000021 |
| Y45G5AM.1   | nhr-114     | chrV   | 0.376628 | 0.000014 |
| K02D3.1     | K02D3.1     | chrX   | 0.376505 | 0.032028 |
| W07A12.7    | rhy-1       | chrII  | 0.376446 | 0.000111 |



|            |            |        |          |          |
|------------|------------|--------|----------|----------|
| D1025.2    | D1025.2    | chrX   | 0.376421 | 0.000128 |
| W06A11.4   | W06A11.4   | chrII  | 0.376417 | 0.013481 |
| T28B4.3    | ttr-6      | chrX   | 0.376411 | 0.000033 |
| C06H2.6    | C06H2.6    | chrV   | 0.376374 | 0.000025 |
| C16C8.13   | C16C8.13   | chrII  | 0.375934 | 0.003566 |
| Y37H2A.6   | fbxa-211   | chrV   | 0.375883 | 0.001952 |
| Y48B6A.2   | rpl-43     | chrII  | 0.375721 | 0.000012 |
| Y39A3CL.6  | pvf-1      | chrIII | 0.375674 | 0.001085 |
| R102.2     | R102.2     | chrIV  | 0.375645 | 0.002001 |
| Y57G11C.25 | ccch-5     | chrIV  | 0.375616 | 0.001651 |
| F43D9.4    | sip-1      | chrIII | 0.375508 | 0.000012 |
| C54D2.4    | sul-3      | chrX   | 0.375191 | 0.008807 |
| T19E7.6    | T19E7.6    | chrIV  | 0.375176 | 0.010813 |
| F12E12.11  | F12E12.11  | chrII  | 0.375085 | 0.042418 |
| F18A11.3   | F18A11.3   | chrII  | 0.375079 | 0.001186 |
| Y119C1B.10 | Y119C1B.10 | chrI   | 0.374925 | 0.000236 |
| C14B1.8    | C14B1.8    | chrIII | 0.374804 | 0.000052 |
| Y67D2.5    | Y67D2.5    | chrIII | 0.374726 | 0.000399 |
| Y37H2A.9   | Y37H2A.9   | chrV   | 0.374703 | 0.002234 |
| F31E9.4    | sdz-16     | chrV   | 0.374664 | 0.018496 |
| R04F11.5   | R04F11.5   | chrV   | 0.374593 | 0.000076 |
| C26F1.7    | hint-3     | chrV   | 0.374484 | 0.000139 |
| K07A1.3    | K07A1.3    | chrI   | 0.374267 | 0.011372 |
| F28A12.3   | F28A12.3   | chrV   | 0.374202 | 0.041734 |
| F47B8.11   | sss-2      | chrV   | 0.374160 | 0.009199 |
| F08F3.9    | F08F3.9    | chrV   | 0.374106 | 0.049523 |
| T28C12.2   | T28C12.2   | chrV   | 0.374068 | 0.007653 |
| F27C1.1    | F27C1.1    | chrI   | 0.373964 | 0.001555 |
| Y22D7AL.10 | Y22D7AL.10 | chrIII | 0.373857 | 0.000018 |
| M03E7.5    | memb-2     | chrV   | 0.373773 | 0.000050 |
| Y77E11A.15 | col-106    | chrIV  | 0.373692 | 0.000014 |
| F40E10.5   | F40E10.5   | chrX   | 0.373639 | 0.026733 |
| Y37D8A.4   | Y37D8A.4   | chrIII | 0.373539 | 0.000040 |
| F53E10.6   | F53E10.6   | chrV   | 0.373453 | 0.000040 |
| Y24D9A.4   | rpl-7A     | chrIV  | 0.373188 | 0.000017 |
| C50B8.1    | C50B8.1    | chrV   | 0.373185 | 0.000024 |
| R11G11.1   | nhr-132    | chrV   | 0.373126 | 0.021724 |
| F44D12.4   | F44D12.4   | chrIV  | 0.372976 | 0.000310 |
| T12B5.14   | T12B5.14   | chrIII | 0.372793 | 0.024132 |
| C03D6.6    | lab-1      | chrI   | 0.372593 | 0.000058 |
| C33A11.2   | C33A11.2   | chrX   | 0.372439 | 0.000550 |
| K09H9.5    | K09H9.5    | chrI   | 0.372247 | 0.007994 |
| T07A9.12   | T07A9.12   | chrIV  | 0.372204 | 0.006812 |
| F35G12.7   | F35G12.7   | chrIII | 0.372004 | 0.000879 |
| K07A12.3   | asg-1      | chrI   | 0.371902 | 0.000020 |
| C02F5.13   | C02F5.13   | chrIII | 0.371855 | 0.000129 |
| F53B6.4    | F53B6.4    | chrI   | 0.371744 | 0.004801 |
| C15C6.2    | C15C6.2    | chrI   | 0.371742 | 0.001143 |
| Y69A2AR.28 | Y69A2AR.28 | chrIV  | 0.371729 | 0.000096 |
| Y38C1AA.14 | Y38C1AA.14 | chrIV  | 0.371660 | 0.000165 |
| W09D6.5    | W09D6.5    | chrIII | 0.371575 | 0.000062 |
| C06E7.3    | sams-4     | chrIV  | 0.371478 | 0.000031 |
| Y66D12A.22 | tin-10     | chrIII | 0.371439 | 0.000045 |
| Y23H5A.2   | Y23H5A.2   | chrI   | 0.371414 | 0.000478 |
| B0041.6    | ptps-1     | chrI   | 0.371398 | 0.000636 |
| Y46H3B.2   | clec-204   | chrV   | 0.371398 | 0.026868 |
| R05D7.1    | R05D7.1    | chrI   | 0.371260 | 0.012336 |
| K07A12.5   | K07A12.5   | chrI   | 0.371042 | 0.024361 |
| M162.2     | clec-258   | chrV   | 0.370953 | 0.001230 |
| T24E12.1   | T24E12.1   | chrII  | 0.370943 | 0.001038 |
| W02H3.1    | W02H3.1    | chrX   | 0.370913 | 0.002800 |
| ZK652.4    | rpl-35     | chrIII | 0.370804 | 0.000016 |
| F01F1.15   | F01F1.15   | chrIII | 0.370773 | 0.000106 |

|            |            |        |          |          |
|------------|------------|--------|----------|----------|
| F20D1.1    | F20D1.1    | chrX   | 0.370764 | 0.000038 |
| T01G5.7    | T01G5.7    | chrV   | 0.370751 | 0.000207 |
| F01G10.2   | ech-8      | chrIV  | 0.370735 | 0.000385 |
| K01A2.1    | sgcb-1     | chrII  | 0.370720 | 0.004190 |
| R90.2      | ttr-27     | chrV   | 0.370531 | 0.018719 |
| D2096.1    | D2096.1    | chrIV  | 0.370462 | 0.000808 |
| F21F3.6    | F21F3.6    | chrI   | 0.370400 | 0.000020 |
| F21D5.8    | F21D5.8    | chrIV  | 0.370277 | 0.000088 |
| F40G9.11   | mxl-2      | chrIII | 0.370272 | 0.000046 |
| ZK822.4    | ZK822.4    | chrIV  | 0.370241 | 0.000099 |
| Y110A7A.7  | Y110A7A.7  | chrI   | 0.370233 | 0.000269 |
| F52C6.2    | F52C6.2    | chrII  | 0.370196 | 0.000184 |
| F55G1.15   | F55G1.15   | chrIV  | 0.370128 | 0.005645 |
| F45H10.3   | F45H10.3   | chrII  | 0.370124 | 0.000028 |
| F35D11.4   | F35D11.4   | chrII  | 0.369967 | 0.000095 |
| Y39B6A.16  | Y39B6A.16  | chrV   | 0.369875 | 0.000542 |
| F54D10.1   | skr-15     | chrII  | 0.369523 | 0.000219 |
| T10C6.8    | T10C6.8    | chrV   | 0.369467 | 0.000038 |
| F54B11.11  | F54B11.11  | chrX   | 0.369314 | 0.010831 |
| K09A9.2    | rab-14     | chrX   | 0.369302 | 0.000062 |
| F43H9.1    | ech-3      | chrV   | 0.368799 | 0.000455 |
| F38H4.10   | F38H4.10   | chrIV  | 0.368726 | 0.000063 |
| W08A12.3   | W08A12.3   | chrV   | 0.368577 | 0.010299 |
| Y69A2AR.21 | Y69A2AR.21 | chrIV  | 0.368452 | 0.000033 |
| F08G5.3    | F08G5.3    | chrIV  | 0.368422 | 0.021357 |
| W05H7.3    | sedl-1     | chrX   | 0.368397 | 0.002494 |
| F45G2.10   | F45G2.10   | chrIII | 0.368072 | 0.000075 |
| Y92H12BR.2 | Y92H12BR.2 | chrI   | 0.367982 | 0.000051 |
| T04B2.6    | dhs-31     | chrIV  | 0.367913 | 0.036983 |
| ZC404.8    | spn-4      | chrV   | 0.367784 | 0.000019 |
| K09F5.3    | spp-14     | chrX   | 0.367678 | 0.000024 |
| Y66D12A.10 | Y66D12A.10 | chrIII | 0.367427 | 0.000065 |
| F38G1.3    | F38G1.3    | chrX   | 0.367234 | 0.043446 |
| F26A1.1    | F26A1.1    | chrIII | 0.367232 | 0.000037 |
| K02F2.5    | K02F2.5    | chrI   | 0.367176 | 0.001000 |
| F35H10.7   | F35H10.7   | chrIV  | 0.367158 | 0.000081 |
| T13F2.2    | T13F2.2    | chrIV  | 0.367011 | 0.000041 |
| T13C2.4    | ssup-72    | chrII  | 0.366865 | 0.000107 |
| T14G12.2   | aex-4      | chrX   | 0.366752 | 0.026242 |
| Y106G6H.8  | Y106G6H.8  | chrI   | 0.366459 | 0.000111 |
| F43G9.2    | F43G9.2    | chrI   | 0.366402 | 0.000106 |
| C15A11.7   | C15A11.7   | chrI   | 0.366384 | 0.001157 |
| F14H3.11   | nhr-176    | chrV   | 0.366276 | 0.015662 |
| F55A12.1   | F55A12.1   | chrI   | 0.366073 | 0.000026 |
| E01B7.2    | E01B7.2    | chrV   | 0.365997 | 0.000145 |
| ZK1240.3   | ZK1240.3   | chrII  | 0.365994 | 0.001347 |
| F54B11.5   | F54B11.5   | chrX   | 0.365989 | 0.000375 |
| F12A10.1   | F12A10.1   | chrII  | 0.365901 | 0.001480 |
| Y111B2A.13 | Y111B2A.13 | chrIII | 0.365813 | 0.002602 |
| R07H5.4    | sdz-27     | chrIV  | 0.365721 | 0.000094 |
| D2045.7    | D2045.7    | chrIII | 0.365523 | 0.009534 |
| Y76B12C.3  | Y76B12C.3  | chrIV  | 0.365508 | 0.000060 |
| Y80D3A.3   | ceh-51     | chrV   | 0.365416 | 0.023533 |
| W02B12.15  | W02B12.15  | chrII  | 0.365279 | 0.000040 |
| C34E10.10  | C34E10.10  | chrIII | 0.365248 | 0.000111 |
| C06A8.8    | C06A8.8    | chrII  | 0.364914 | 0.009004 |
| Y54E5B.4   | ubc-16     | chrI   | 0.364912 | 0.000068 |
| F44C4.5    | ppt-1      | chrV   | 0.364895 | 0.001913 |
| K11D12.13  | K11D12.13  | chrV   | 0.364801 | 0.000052 |
| ZK512.4    | ZK512.4    | chrIII | 0.364663 | 0.000172 |
| Y105E8B.6  | Y105E8B.6  | chrI   | 0.364388 | 0.001926 |
| Y102A5C.6  | Y102A5C.6  | chrV   | 0.364284 | 0.000029 |
| F52C12.6   | F52C12.6   | chrIV  | 0.364095 | 0.000152 |

|            |            |        |          |          |
|------------|------------|--------|----------|----------|
| W05B10.2   | ccch-3     | chrV   | 0.364027 | 0.000078 |
| B0218.6    | clec-51    | chrIV  | 0.363944 | 0.000491 |
| C06A5.8    | C06A5.8    | chrI   | 0.363909 | 0.000098 |
| ZK616.6    | ZK616.6    | chrIV  | 0.363875 | 0.000041 |
| Y62E10A.14 | Y62E10A.14 | chrIV  | 0.363804 | 0.000049 |
| F07H5.3    | F07H5.3    | chrII  | 0.363726 | 0.000041 |
| T16H12.9   | T16H12.9   | chrIII | 0.363374 | 0.039052 |
| F29B9.10   | F29B9.10   | chrIV  | 0.363183 | 0.000412 |
| C29G2.1    | C29G2.1    | chrV   | 0.363088 | 0.003441 |
| C15C8.1    | C15C8.1    | chrV   | 0.363054 | 0.015867 |
| F39G3.2    | F39G3.2    | chrV   | 0.362958 | 0.004572 |
| C43E11.12  | C43E11.12  | chrI   | 0.362926 | 0.000090 |
| DH11.4     | DH11.4     | chrII  | 0.362915 | 0.037779 |
| F46G10.2   | F46G10.2   | chrX   | 0.362726 | 0.001527 |
| Y95B8A.6   | Y95B8A.6   | chrI   | 0.362677 | 0.002602 |
| F14B8.2    | F14B8.2    | chrX   | 0.362649 | 0.004101 |
| F59C12.4   | F59C12.4   | chrX   | 0.362567 | 0.000297 |
| F09E5.17   | bmy-1      | chrII  | 0.362535 | 0.000065 |
| Y67D2.4    | Y67D2.4    | chrIII | 0.362385 | 0.000336 |
| T23B12.1   | T23B12.1   | chrV   | 0.362361 | 0.000098 |
| K02B2.5    | rps-25     | chrIV  | 0.362257 | 0.000025 |
| Y52E8A.3   | Y52E8A.3   | chrII  | 0.362137 | 0.024709 |
| C24H11.5   | C24H11.5   | chrIII | 0.362018 | 0.001852 |
| CD4.7      | CD4.7      | chrV   | 0.361994 | 0.000161 |
| R06B9.4    | arrd-14    | chrII  | 0.361989 | 0.001950 |
| F08G2.4    | F08G2.4    | chrII  | 0.361966 | 0.000956 |
| F38E9.1    | F38E9.1    | chrX   | 0.361794 | 0.000443 |
| F29A7.6    | F29A7.6    | chrII  | 0.361698 | 0.000217 |
| Y39B6A.5   | Y39B6A.5   | chrV   | 0.361662 | 0.002133 |
| F02E9.1    | F02E9.1    | chrI   | 0.361636 | 0.000157 |
| F49C12.12  | F49C12.12  | chrIV  | 0.361553 | 0.000041 |
| F38A1.5    | clec-166   | chrIV  | 0.361388 | 0.005378 |
| C43H6.3    | C43H6.3    | chrX   | 0.361339 | 0.000552 |
| CC8.2      | CC8.2      | chrIV  | 0.360981 | 0.000133 |
| F15E6.1    | set-9      | chrIV  | 0.360932 | 0.000087 |
| Y17G7B.8   | Y17G7B.8   | chrII  | 0.360862 | 0.003096 |
| F14H3.6    | F14H3.6    | chrV   | 0.360756 | 0.000033 |
| R12E2.10   | egg-5      | chrI   | 0.360736 | 0.000193 |
| ZK1320.11  | ZK1320.11  | chrII  | 0.360705 | 0.001328 |
| Y52B11A.8  | Y52B11A.8  | chrI   | 0.360633 | 0.000053 |
| C46F9.1    | math-22    | chrII  | 0.360562 | 0.010995 |
| B0280.10   | pot-1      | chrIII | 0.360515 | 0.000238 |
| M04G7.3    | M04G7.3    | chrIV  | 0.360472 | 0.009669 |
| F38B2.4    | F38B2.4    | chrX   | 0.360398 | 0.000095 |
| C44B9.3    | C44B9.3    | chrIII | 0.360373 | 0.000073 |
| Y47H9C.11  | Y47H9C.11  | chrI   | 0.360322 | 0.008074 |
| E01A2.4    | E01A2.4    | chrI   | 0.360086 | 0.000037 |
| Y53F4B.29  | gst-26     | chrII  | 0.359897 | 0.000100 |
| Y57G11C.11 | coq-3      | chrIV  | 0.359806 | 0.000255 |
| C14A4.10   | taf-13     | chrII  | 0.359606 | 0.000080 |
| ZC155.7    | syn-16     | chrIII | 0.359541 | 0.000066 |
| T16D1.2    | pho-4      | chrII  | 0.359535 | 0.001151 |
| Y38E10A.17 | Y38E10A.17 | chrII  | 0.359522 | 0.005624 |
| T03F1.6    | T03F1.6    | chrI   | 0.359489 | 0.001650 |
| T09F3.4    | T09F3.4    | chrII  | 0.359332 | 0.000698 |
| F42F12.4   | F42F12.4   | chrX   | 0.359239 | 0.002347 |
| K05G3.3    | cah-3      | chrX   | 0.359220 | 0.000118 |
| M01B2.10   | M01B2.10   | chrV   | 0.359000 | 0.012742 |
| R06C7.2    | R06C7.2    | chrI   | 0.358994 | 0.000298 |
| Y40C5A.4   | Y40C5A.4   | chrIV  | 0.358869 | 0.002523 |
| C06B8.2    | C06B8.2    | chrV   | 0.358861 | 0.019898 |
| R06F6.6    | R06F6.6    | chrII  | 0.358736 | 0.006074 |
| VW02B12L.4 | adbp-1     | chrII  | 0.358707 | 0.000095 |

|             |             |        |          |          |
|-------------|-------------|--------|----------|----------|
| Y47H9C.14   | Y47H9C.14   | chrI   | 0.358700 | 0.001395 |
| Y62H9A.6    | Y62H9A.6    | chrX   | 0.358226 | 0.000035 |
| F22B8.7     | F22B8.7     | chrV   | 0.358226 | 0.000094 |
| T20B3.2     | tni-3       | chrV   | 0.358223 | 0.000090 |
| K04F10.1    | K04F10.1    | chrI   | 0.358065 | 0.010832 |
| R09B3.2     | R09B3.2     | chrI   | 0.358038 | 0.000037 |
| F45G2.9     | F45G2.9     | chrIII | 0.358031 | 0.002241 |
| C37C3.7     | C37C3.7     | chrV   | 0.358024 | 0.035076 |
| M199.5      | col-135     | chrIV  | 0.358018 | 0.000455 |
| C53B4.6     | C53B4.6     | chrIV  | 0.357932 | 0.000372 |
| Y37A1B.5    | Y37A1B.5    | chrIV  | 0.357851 | 0.000064 |
| C33G8.7     | nhr-161     | chrV   | 0.357799 | 0.004250 |
| ZK688.7     | ZK688.7     | chrIII | 0.357605 | 0.001704 |
| F39B2.11    | mtx-1       | chrI   | 0.357567 | 0.000057 |
| ZK892.1     | lec-3       | chrII  | 0.357510 | 0.000185 |
| C16A3.9     | rps-13      | chrIII | 0.357409 | 0.000034 |
| F14E5.5     | lips-10     | chrII  | 0.357251 | 0.000307 |
| C29E4.15    | C29E4.15    | chrIII | 0.357198 | 0.006949 |
| C42C1.14    | rpl-34      | chrIV  | 0.357093 | 0.000035 |
| E_BE45912.2 | E_BE45912.2 | chrIII | 0.357074 | 0.002743 |
| R07B7.4     | R07B7.4     | chrV   | 0.356924 | 0.046529 |
| R04F11.2    | R04F11.2    | chrV   | 0.356904 | 0.000040 |
| F28F8.3     | lsm-5       | chrV   | 0.356890 | 0.000106 |
| F19F10.1    | F19F10.1    | chrV   | 0.356728 | 0.022347 |
| D2021.4     | D2021.4     | chrX   | 0.356702 | 0.008964 |
| C48B6.10    | C48B6.10    | chrI   | 0.356688 | 0.000070 |
| F45C12.12   | btb-7       | chrII  | 0.356606 | 0.005703 |
| Y18D10A.19  | fkf-2       | chrI   | 0.356456 | 0.000040 |
| K11H12.7    | K11H12.7    | chrIV  | 0.356322 | 0.000263 |
| F31F7.1     | F31F7.1     | chrV   | 0.356192 | 0.000080 |
| R04A9.6     | R04A9.6     | chrX   | 0.355986 | 0.022185 |
| C06A8.9     | glr-4       | chrII  | 0.355959 | 0.014951 |
| C50B8.6     | C50B8.6     | chrV   | 0.355936 | 0.004939 |
| C34D4.10    | C34D4.10    | chrIV  | 0.355868 | 0.000672 |
| C30H6.9     | C30H6.9     | chrIV  | 0.355413 | 0.000297 |
| B0041.8     | B0041.8     | chrI   | 0.355381 | 0.000057 |
| Y38F2AR.9   | Y38F2AR.9   | chrIV  | 0.355324 | 0.000051 |
| C50D2.10    | C50D2.10    | chrII  | 0.355291 | 0.001711 |
| F53B6.1     | tsp-15      | chrI   | 0.355267 | 0.007755 |
| R05G9.2     | R05G9.2     | chrII  | 0.355223 | 0.025475 |
| Y77E11A.2   | Y77E11A.2   | chrIV  | 0.355214 | 0.000468 |
| F44C8.11    | nhr-96      | chrV   | 0.355079 | 0.033052 |
| C01G12.3    | C01G12.3    | chrII  | 0.354943 | 0.018515 |
| R11A5.3     | R11A5.3     | chrI   | 0.354858 | 0.001977 |
| C29F4.2     | C29F4.2     | chrIV  | 0.354819 | 0.001703 |
| C02B10.4    | C02B10.4    | chrIV  | 0.354810 | 0.000052 |
| T21C12.1    | unc-49      | chrIII | 0.354663 | 0.000796 |
| K07A1.17    | K07A1.17    | chrI   | 0.354613 | 0.000080 |
| T10B10.4    | T10B10.4    | chrX   | 0.354376 | 0.000344 |
| C33H5.4     | klp-10      | chrIV  | 0.354371 | 0.000112 |
| F26H11.1    | kbp-3       | chrII  | 0.354341 | 0.000082 |
| D1007.8     | D1007.8     | chrI   | 0.354222 | 0.000251 |
| C01C4.3     | C01C4.3     | chrX   | 0.354208 | 0.004173 |
| D1086.7     | D1086.7     | chrV   | 0.354171 | 0.000281 |
| C24H10.5    | cal-5       | chrX   | 0.354116 | 0.000116 |
| C34D4.13    | C34D4.13    | chrIV  | 0.354043 | 0.000188 |
| C48B4.8     | C48B4.8     | chrIII | 0.353897 | 0.000864 |
| C29A12.1    | C29A12.1    | chrV   | 0.353860 | 0.000086 |
| F57A10.4    | F57A10.4    | chrV   | 0.353821 | 0.001430 |
| F15B9.3     | far-5       | chrV   | 0.353789 | 0.004652 |
| T23D8.5     | his-67      | chrI   | 0.353675 | 0.009147 |
| D2013.1     | rab-39      | chrII  | 0.353599 | 0.000273 |
| C06A1.2     | C06A1.2     | chrII  | 0.353411 | 0.020269 |

|            |            |        |          |          |
|------------|------------|--------|----------|----------|
| K12C11.6   | K12C11.6   | chrI   | 0.353016 | 0.042594 |
| Y56A3A.21  | trap-4     | chrIII | 0.353005 | 0.000047 |
| C35D10.11  | msd-4      | chrIII | 0.352978 | 0.001625 |
| ZK1010.3   | frg-1      | chrIII | 0.352571 | 0.000086 |
| Y4C6B.7    | Y4C6B.7    | chrIV  | 0.352542 | 0.000910 |
| Y71H2AL.1  | Y71H2AL.1  | chrIII | 0.352459 | 0.000483 |
| M02B1.3    | M02B1.3    | chrIV  | 0.352430 | 0.000053 |
| C13A10.1   | C13A10.1   | chrII  | 0.352398 | 0.022401 |
| H14A12.5   | H14A12.5   | chrIII | 0.352368 | 0.029687 |
| C48E7.10   | spp-15     | chrI   | 0.352193 | 0.000863 |
| C08A9.6    | C08A9.6    | chrX   | 0.351524 | 0.001913 |
| T06E4.4    | col-147    | chrV   | 0.351375 | 0.002046 |
| T07A5.5    | T07A5.5    | chrIII | 0.351131 | 0.000443 |
| T15B7.1    | T15B7.1    | chrV   | 0.351129 | 0.000077 |
| K08D10.12  | K08D10.12  | chrIV  | 0.350822 | 0.002841 |
| Y55F3BR.5  | madf-1     | chrIV  | 0.350748 | 0.020912 |
| F57G4.4    | F57G4.4    | chrV   | 0.350693 | 0.005218 |
| C03D6.8    | rpl-24.2   | chrI   | 0.350673 | 0.000083 |
| T19C4.7    | nlp-33     | chrV   | 0.350608 | 0.000148 |
| C07H4.1    | C07H4.1    | chrII  | 0.350550 | 0.026895 |
| T27E4.4    | fip-2      | chrV   | 0.350457 | 0.000318 |
| F32H2.10   | F32H2.10   | chrI   | 0.350400 | 0.000248 |
| F54D7.6    | F54D7.6    | chrI   | 0.350370 | 0.000091 |
| T10C6.5    | T10C6.5    | chrV   | 0.350135 | 0.000064 |
| K08D8.3    | K08D8.3    | chrIV  | 0.350102 | 0.000656 |
| Y39B6A.42  | Y39B6A.42  | chrV   | 0.349781 | 0.000132 |
| F20B4.6    | cgt-2      | chrX   | 0.349731 | 0.003290 |
| F16D3.7    | ser-5      | chrI   | 0.349634 | 0.042089 |
| K04C1.5    | K04C1.5    | chrX   | 0.349518 | 0.000088 |
| B0336.10   | rpl-23     | chrIII | 0.349491 | 0.000050 |
| F20A1.6    | F20A1.6    | chrV   | 0.349334 | 0.040601 |
| C47B2.1    | fbxa-140   | chrI   | 0.349267 | 0.006315 |
| C50F4.7    | his-37     | chrV   | 0.349251 | 0.000165 |
| C38D4.9    | C38D4.9    | chrIII | 0.349229 | 0.002325 |
| B0511.7    | B0511.7    | chrI   | 0.349218 | 0.000102 |
| C55A6.3    | C55A6.3    | chrV   | 0.349145 | 0.018952 |
| R11A5.7    | R11A5.7    | chrI   | 0.349131 | 0.007112 |
| F40G12.11  | F40G12.11  | chrV   | 0.348978 | 0.000129 |
| F33G12.2   | F33G12.2   | chrII  | 0.348946 | 0.000296 |
| Y49F6C.8   | Y49F6C.8   | chrII  | 0.348926 | 0.000318 |
| C17E4.11   | C17E4.11   | chrI   | 0.348915 | 0.001564 |
| F41E6.5    | F41E6.5    | chrV   | 0.348751 | 0.005306 |
| ZK381.1    | him-3      | chrIV  | 0.348731 | 0.000084 |
| T27F6.2    | clec-12    | chrI   | 0.348687 | 0.013133 |
| W01G7.4    | W01G7.4    | chrII  | 0.348543 | 0.000129 |
| C08B6.3    | C08B6.3    | chrV   | 0.348492 | 0.009255 |
| H06H21.11  | H06H21.11  | chrIV  | 0.348451 | 0.000195 |
| W08E12.1   | W08E12.1   | chrIV  | 0.348409 | 0.002336 |
| Y54G2A.5   | dml-1      | chrIV  | 0.348095 | 0.000091 |
| T04B2.3    | T04B2.3    | chrIV  | 0.347954 | 0.010134 |
| F36D1.9    | F36D1.9    | chrI   | 0.347953 | 0.021142 |
| F09G8.7    | F09G8.7    | chrIII | 0.347946 | 0.000238 |
| B0454.9    | B0454.9    | chrII  | 0.347737 | 0.000563 |
| T28D9.1    | T28D9.1    | chrII  | 0.347728 | 0.000076 |
| K05C4.2    | K05C4.2    | chrI   | 0.347536 | 0.000083 |
| K02A11.3   | K02A11.3   | chrI   | 0.347364 | 0.001962 |
| Y119C1B.4  | Y119C1B.4  | chrI   | 0.347283 | 0.000124 |
| B0252.4    | cyn-10     | chrII  | 0.347262 | 0.000196 |
| F36A2.8    | phip-1     | chrI   | 0.347232 | 0.000283 |
| K04G2.10   | K04G2.10   | chrI   | 0.347105 | 0.000299 |
| Y57G11C.45 | Y57G11C.45 | chrIV  | 0.347098 | 0.023086 |
| K07F5.11   | ssq-1      | chrIV  | 0.346813 | 0.002776 |
| Y77E11A.6  | Y77E11A.6  | chrIV  | 0.346798 | 0.001926 |

|            |            |        |          |          |
|------------|------------|--------|----------|----------|
| D2024.5    | D2024.5    | chrIV  | 0.346757 | 0.000133 |
| ZK652.3    | tag-277    | chrIII | 0.346729 | 0.000115 |
| F18E2.1    | F18E2.1    | chrV   | 0.346623 | 0.000116 |
| T05D4.1    | aldo-1     | chrIII | 0.346597 | 0.000091 |
| E01G4.3    | E01G4.3    | chrII  | 0.346551 | 0.000205 |
| T04F8.8    | T04F8.8    | chrX   | 0.346428 | 0.000083 |
| ZK1098.11  | ZK1098.11  | chrIII | 0.346386 | 0.001071 |
| C46C11.3   | C46C11.3   | chrX   | 0.346379 | 0.009585 |
| Y53C10A.14 | Y53C10A.14 | chrI   | 0.346367 | 0.002043 |
| Y38C1AA.3  | pnc-1      | chrIV  | 0.346266 | 0.000232 |
| T16H12.11  | T16H12.11  | chrIII | 0.346244 | 0.000184 |
| F36H5.5    | fbxb-53    | chrII  | 0.346244 | 0.042855 |
| F56G4.4    | F56G4.4    | chrI   | 0.346226 | 0.000107 |
| C05E7.2    | C05E7.2    | chrX   | 0.346173 | 0.018627 |
| Y106G6H.3  | rpl-30     | chrI   | 0.346082 | 0.000062 |
| C28D4.1    | nhr-100    | chrIV  | 0.346060 | 0.001716 |
| F43G9.13   | F43G9.13   | chrI   | 0.345890 | 0.000439 |
| T04C12.6   | act-1      | chrV   | 0.345736 | 0.000073 |
| Y50E8A.3   | oig-3      | chrV   | 0.345539 | 0.004063 |
| W02D7.5    | W02D7.5    | chrV   | 0.345408 | 0.005973 |
| B0336.13   | B0336.13   | chrIII | 0.345341 | 0.000166 |
| Y111B2A.21 | Y111B2A.21 | chrIII | 0.345336 | 0.025042 |
| R10E8.1    | R10E8.1    | chrV   | 0.345141 | 0.003986 |
| F10C1.9    | F10C1.9    | chrII  | 0.345115 | 0.001027 |
| Y102E9.5   | Y102E9.5   | chrIII | 0.344970 | 0.014951 |
| F37C4.4    | F37C4.4    | chrIV  | 0.344963 | 0.014443 |
| T16G12.4   | T16G12.4   | chrIII | 0.344721 | 0.000295 |
| M176.11    | M176.11    | chrII  | 0.344675 | 0.002620 |
| F41B4.2    | F41B4.2    | chrX   | 0.344656 | 0.009218 |
| Y43E12A.2  | Y43E12A.2  | chrIV  | 0.344583 | 0.001831 |
| F23D12.7   | F23D12.7   | chrX   | 0.344280 | 0.014338 |
| Y38F2AR.2  | trap-3     | chrIV  | 0.344254 | 0.000075 |
| B0334.2    | twk-5      | chrII  | 0.344253 | 0.002056 |
| T07E3.3    | T07E3.3    | chrIII | 0.344250 | 0.000126 |
| F49E12.9   | F49E12.9   | chrII  | 0.344235 | 0.000161 |
| K07E3.8    | vem-1      | chrX   | 0.344159 | 0.000206 |
| C34B2.10   | C34B2.10   | chrI   | 0.344028 | 0.000153 |
| K08E4.6    | K08E4.6    | chrIV  | 0.344028 | 0.000138 |
| JC8.3      | rpl-12     | chrIV  | 0.343923 | 0.000068 |
| C16A3.2    | C16A3.2    | chrIII | 0.343818 | 0.000348 |
| B0464.3    | nlp-36     | chrIII | 0.343784 | 0.000155 |
| ZK418.6    | ZK418.6    | chrIII | 0.343767 | 0.020206 |
| T27E9.3    | cdk-5      | chrIII | 0.343691 | 0.000184 |
| F44E7.9    | F44E7.9    | chrV   | 0.343532 | 0.000157 |
| R53.2      | R53.2      | chrII  | 0.343499 | 0.000203 |
| ZK973.6    | anc-1      | chrI   | 0.343487 | 0.000122 |
| C08F11.11  | C08F11.11  | chrIV  | 0.343384 | 0.000082 |
| T27A8.2    | T27A8.2    | chrX   | 0.343350 | 0.004344 |
| F08H9.8    | clec-54    | chrV   | 0.343269 | 0.020473 |
| T08A9.2    | ttr-30     | chrX   | 0.343063 | 0.014227 |
| F42A9.5    | cyp-33E2   | chrIV  | 0.343020 | 0.011525 |
| C35D10.5   | C35D10.5   | chrIII | 0.342955 | 0.000284 |
| C24G6.1    | syp-2      | chrV   | 0.342792 | 0.000181 |
| W05H7.1    | W05H7.1    | chrX   | 0.342720 | 0.003603 |
| MTCE.23    | MTCE.23    | chrM   | 0.342691 | 0.000072 |
| M176.4     | M176.4     | chrII  | 0.342601 | 0.000465 |
| T03F6.4    | T03F6.4    | chrIII | 0.342541 | 0.046903 |
| M116.2     | M116.2     | chrIV  | 0.342541 | 0.003169 |
| F55B11.3   | F55B11.3   | chrIV  | 0.342373 | 0.000146 |
| C05C8.1    | C05C8.1    | chrV   | 0.342221 | 0.000310 |
| C08B6.1    | ugt-17     | chrV   | 0.342118 | 0.000491 |
| F01F1.3    | F01F1.3    | chrIII | 0.341974 | 0.007468 |
| Y116A8C.30 | Y116A8C.30 | chrIV  | 0.341831 | 0.000583 |

|            |            |        |          |          |
|------------|------------|--------|----------|----------|
| C06E1.1    | C06E1.1    | chrIII | 0.341807 | 0.001105 |
| C27A7.6    | C27A7.6    | chrV   | 0.341786 | 0.000686 |
| C06G3.11   | tin-9.1    | chrIV  | 0.341540 | 0.000235 |
| F52A8.1    | F52A8.1    | chrI   | 0.341515 | 0.000100 |
| F09G8.2    | crn-7      | chrIII | 0.341406 | 0.005055 |
| K11D12.5   | K11D12.5   | chrV   | 0.341365 | 0.000302 |
| Y71F9AM.5  | nxt-1      | chrI   | 0.341302 | 0.000178 |
| B0024.9    | trx-2      | chrV   | 0.341249 | 0.000244 |
| ZK1193.1   | col-19     | chrX   | 0.341106 | 0.000078 |
| C04F12.9   | rnh-1.3    | chrI   | 0.341031 | 0.016083 |
| R07E5.13   | R07E5.13   | chrIII | 0.340959 | 0.000165 |
| C33G8.11   | nhr-107    | chrV   | 0.340943 | 0.027892 |
| C06E7.1    | sams-3     | chrIV  | 0.340935 | 0.000206 |
| ZC204.7    | fbxb-15    | chrII  | 0.340921 | 0.024981 |
| C26F1.4    | rps-30     | chrV   | 0.340819 | 0.000082 |
| T24H10.6   | dyrb-1     | chrII  | 0.340724 | 0.000240 |
| C28G1.1    | ubc-23     | chrX   | 0.340707 | 0.019413 |
| E01A2.5    | E01A2.5    | chrI   | 0.340118 | 0.000448 |
| ZK970.2    | clpp-1     | chrII  | 0.340025 | 0.000318 |
| F49E12.10  | F49E12.10  | chrII  | 0.339967 | 0.033043 |
| Y22D7AL.15 | Y22D7AL.15 | chrIII | 0.339837 | 0.002551 |
| Y71G12B.10 | Y71G12B.10 | chrI   | 0.339723 | 0.000161 |
| C50C3.1    | C50C3.1    | chrIII | 0.339711 | 0.000175 |
| K01B6.3    | K01B6.3    | chrIII | 0.339690 | 0.023822 |
| Y71H2AM.5  | Y71H2AM.5  | chrIII | 0.339507 | 0.000095 |
| C34D4.4    | C34D4.4    | chrIV  | 0.339490 | 0.000161 |
| Y54F10AM.2 | feh-1      | chrIII | 0.339484 | 0.008402 |
| F43E2.2    | rpb-4      | chrII  | 0.339332 | 0.000132 |
| Y53H1A.2   | Y53H1A.2   | chrI   | 0.339280 | 0.000344 |
| Y71G12B.23 | Y71G12B.23 | chrI   | 0.339229 | 0.008170 |
| Y18H1A.7   | Y18H1A.7   | chrI   | 0.339197 | 0.000416 |
| T19C4.5    | T19C4.5    | chrV   | 0.339098 | 0.046119 |
| F28B3.6    | F28B3.6    | chrI   | 0.339075 | 0.000286 |
| R09B3.3    | R09B3.3    | chrI   | 0.338929 | 0.000092 |
| F37H8.3    | F37H8.3    | chrII  | 0.338873 | 0.016657 |
| Y51H7C.1   | Y51H7C.1   | chrII  | 0.338766 | 0.000515 |
| C15C6.1    | C15C6.1    | chrI   | 0.338696 | 0.043491 |
| C46E10.9   | C46E10.9   | chrII  | 0.338670 | 0.010255 |
| VZK822L.1  | fat-6      | chrIV  | 0.338370 | 0.000110 |
| F45H10.2   | F45H10.2   | chrII  | 0.338289 | 0.000151 |
| F25B4.4    | F25B4.4    | chrV   | 0.338198 | 0.000516 |
| C26F1.3    | C26F1.3    | chrV   | 0.338178 | 0.000198 |
| C30H6.8    | C30H6.8    | chrIV  | 0.338131 | 0.000641 |
| K08B5.2    | K08B5.2    | chrX   | 0.338064 | 0.040032 |
| C25H3.14   | C25H3.14   | chrII  | 0.338049 | 0.000767 |
| T21E3.1    | egg-4      | chrI   | 0.338041 | 0.000652 |
| C55A6.12   | C55A6.12   | chrV   | 0.337989 | 0.000884 |
| M60.4      | M60.4      | chrX   | 0.337973 | 0.000236 |
| W04C9.4    | W04C9.4    | chrI   | 0.337773 | 0.000171 |
| F48C1.5    | F48C1.5    | chrI   | 0.337595 | 0.000434 |
| C09H10.10  | C09H10.10  | chrII  | 0.337477 | 0.000316 |
| C09F12.1   | clc-1      | chrX   | 0.337323 | 0.004650 |
| T15B7.2    | T15B7.2    | chrV   | 0.337240 | 0.000127 |
| R09F10.1   | R09F10.1   | chrX   | 0.337234 | 0.000608 |
| C25H3.17   | C25H3.17   | chrII  | 0.337092 | 0.002173 |
| T27F7.1    | T27F7.1    | chrII  | 0.337045 | 0.000165 |
| F36H1.1    | fbk-1      | chrIV  | 0.336962 | 0.000135 |
| T10D4.3    | T10D4.3    | chrII  | 0.336947 | 0.025949 |
| ZK596.1    | ZK596.1    | chrIV  | 0.336881 | 0.000753 |
| T09E8.3    | T09E8.3    | chrV   | 0.336809 | 0.000236 |
| C25E10.9   | swm-1      | chrV   | 0.336626 | 0.001097 |
| ZK637.13   | glb-1      | chrIII | 0.336518 | 0.000285 |
| T14G10.8   | T14G10.8   | chrIV  | 0.336440 | 0.009767 |

|            |            |          |          |          |
|------------|------------|----------|----------|----------|
| C42D4.6    | skr-16     | chrIV    | 0.336348 | 0.001207 |
| Y54G11A.14 | Y54G11A.14 | chrII    | 0.336127 | 0.014521 |
| C27A7.8    | C27A7.8    | chrV     | 0.336080 | 0.014401 |
| K12H4.2    | K12H4.2    | chrIII   | 0.335988 | 0.000577 |
| K07A1.13   | K07A1.13   | chrI     | 0.335867 | 0.005644 |
| F07G6.10   | F07G6.10   | chrX     | 0.335833 | 0.015264 |
| Y75B12B.4  | bath-36    | chrV     | 0.335806 | 0.007863 |
| T21C9.13   | T21C9.13   | chrV     | 0.335610 | 0.000141 |
| Y41C4A.10  | elb-1      | chrIII   | 0.335596 | 0.000366 |
| R144.6     | R144.6     | chrIII   | 0.335566 | 0.000468 |
| Y22D7AL.8  | sms-3      | chrIII   | 0.335498 | 0.003913 |
| R11H6.4    | R11H6.4    | chrV     | 0.335321 | 0.017576 |
| F19H6.4    | F19H6.4    | chrX     | 0.335154 | 0.000489 |
| T07C12.14  | T07C12.14  | 0.335150 | 0.335150 | 0.000248 |
| F59E12.5   | npl-4.2    | chrII    | 0.335129 | 0.002380 |
| Y65B4A.3   | vps-20     | chrI     | 0.335045 | 0.000223 |
| F13E9.13   | F13E9.13   | chrIV    | 0.334980 | 0.033868 |
| ZK1058.5   | ZK1058.5   | chrIII   | 0.334760 | 0.000645 |
| ZK688.2    | ZK688.2    | chrIII   | 0.334742 | 0.002250 |
| F33D4.1    | nhr-8      | chrIV    | 0.334726 | 0.003631 |
| E04A4.5    | E04A4.5    | chrIV    | 0.334617 | 0.000164 |
| F58A4.6    | F58A4.6    | chrIII   | 0.334422 | 0.001947 |
| Y46G5A.12  | vps-2      | chrII    | 0.334316 | 0.000191 |
| T16G12.8   | T16G12.8   | chrIII   | 0.334234 | 0.000607 |
| F52C6.9    | F52C6.9    | chrII    | 0.334046 | 0.029546 |
| C01A2.4    | C01A2.4    | chrI     | 0.334014 | 0.000361 |
| Y71F9B.3   | yop-1      | chrI     | 0.334011 | 0.000127 |
| C32E8.5    | C32E8.5    | chrI     | 0.333901 | 0.000180 |
| F14B8.4    | F14B8.4    | chrX     | 0.333744 | 0.010490 |
| C17E7.9    | C17E7.9    | chrV     | 0.333554 | 0.000569 |
| C41G7.1    | smn-1      | chrI     | 0.333488 | 0.000273 |
| C18E9.4    | C18E9.4    | chrII    | 0.333481 | 0.000182 |
| T05A6.2    | cki-2      | chrII    | 0.333365 | 0.000237 |
| F40E3.2    | F40E3.2    | chrI     | 0.333347 | 0.000282 |
| F28F8.4    | fbxa-95    | chrV     | 0.333292 | 0.003933 |
| R74.2      | R74.2      | chrIII   | 0.333044 | 0.044157 |
| C28A5.1    | C28A5.1    | chrIII   | 0.333025 | 0.000328 |
| C16A3.5    | C16A3.5    | chrIII   | 0.332753 | 0.000148 |
| H14N18.3   | ttr-47     | chrV     | 0.332703 | 0.000265 |
| ZK177.1    | ZK177.1    | chrII    | 0.332653 | 0.000448 |
| B0336.5    | B0336.5    | chrIII   | 0.332302 | 0.000248 |
| W03F8.4    | W03F8.4    | chrIV    | 0.332233 | 0.000183 |
| C27A2.2    | rpl-22     | chrII    | 0.332200 | 0.000128 |
| F10E7.6    | F10E7.6    | chrII    | 0.332030 | 0.000460 |
| F45C12.7   | btb-6      | chrII    | 0.332019 | 0.000787 |
| ZC239.6    | ZC239.6    | chrII    | 0.332012 | 0.030349 |
| B0495.10   | cpna-5     | chrII    | 0.332012 | 0.008494 |
| K11D2.2    | asah-1     | chrI     | 0.331975 | 0.000247 |
| F09E5.14   | F09E5.14   | chrII    | 0.331918 | 0.018629 |
| F18A1.7    | F18A1.7    | chrII    | 0.331906 | 0.000139 |
| T01E8.2    | ref-1      | chrII    | 0.331519 | 0.001778 |
| F45E1.6    | his-71     | chrX     | 0.331457 | 0.000966 |
| C46E10.8   | C46E10.8   | chrII    | 0.331408 | 0.020490 |
| Y41E3.8    | Y41E3.8    | chrIV    | 0.331376 | 0.001130 |
| F13H10.6   | F13H10.6   | chrIV    | 0.331238 | 0.001559 |
| C29F9.3    | C29F9.3    | chrIII   | 0.331099 | 0.001361 |
| W10D9.5    | tomm-22    | chrII    | 0.330919 | 0.000277 |
| ZK896.6    | clcc-187   | chrIV    | 0.330838 | 0.001344 |
| T23F11.3   | cdka-1     | chrIII   | 0.330831 | 0.020050 |
| ZK1010.10  | ZK1010.10  | chrIII   | 0.330818 | 0.012134 |
| Y57G11C.33 | Y57G11C.33 | chrIV    | 0.330732 | 0.000354 |
| C06A8.3    | C06A8.3    | chrII    | 0.330722 | 0.000141 |
| Y69H2.6    | ubc-19     | chrV     | 0.330671 | 0.015968 |



|            |            |        |          |          |
|------------|------------|--------|----------|----------|
| ZK829.5    | tbx-36     | chrIV  | 0.330618 | 0.001176 |
| R12C12.6   | R12C12.6   | chrII  | 0.330593 | 0.000328 |
| F40F4.3    | lbp-1      | chrX   | 0.330557 | 0.000182 |
| W09C5.8    | W09C5.8    | chrI   | 0.330557 | 0.000148 |
| Y6G8.3     | ztf-25     | chrV   | 0.330466 | 0.000903 |
| Y79H2A.2   | Y79H2A.2   | chrIII | 0.330289 | 0.009005 |
| T10C6.10   | T10C6.10   | chrV   | 0.330216 | 0.001791 |
| C16E9.1    | C16E9.1    | chrX   | 0.330215 | 0.036370 |
| F25B4.9    | clcc-1     | chrV   | 0.330201 | 0.000181 |
| F15A4.11   | tag-281    | chrII  | 0.330106 | 0.006920 |
| R09F10.8   | R09F10.8   | chrX   | 0.329836 | 0.000218 |
| Y56A3A.22  | Y56A3A.22  | chrIII | 0.329754 | 0.000261 |
| R13F6.9    | sma-3      | chrIII | 0.329698 | 0.011448 |
| M05D6.5    | M05D6.5    | chrII  | 0.329697 | 0.000637 |
| C16C8.12   | C16C8.12   | chrII  | 0.329624 | 0.002821 |
| Y71H2B.1   | Y71H2B.1   | chrIII | 0.329277 | 0.008334 |
| F52C6.10   | bath-7     | chrII  | 0.329181 | 0.009404 |
| E02C12.13  | ttr-49     | chrV   | 0.329092 | 0.010822 |
| F56H1.7    | F56H1.7    | chrI   | 0.329085 | 0.000265 |
| Y54G11A.11 | Y54G11A.11 | chrII  | 0.329058 | 0.000263 |
| F55G1.11   | his-60     | chrIV  | 0.329053 | 0.029358 |
| C26G2.2    | C26G2.2    | chrX   | 0.329016 | 0.001658 |
| Y45G5AM.5  | Y45G5AM.5  | chrV   | 0.328817 | 0.009034 |
| Y34B4A.6   | Y34B4A.6   | chrX   | 0.328745 | 0.000223 |
| D1054.14   | D1054.14   | chrV   | 0.328694 | 0.000209 |
| T04A8.11   | T04A8.11   | chrIII | 0.328663 | 0.000358 |
| Y54E2A.3   | tac-1      | chrII  | 0.328509 | 0.000228 |
| C25E10.10  | C25E10.10  | chrV   | 0.328363 | 0.005616 |
| T10H10.3   | sav-1      | chrX   | 0.328349 | 0.002468 |
| F56D5.5    | F56D5.5    | chrIV  | 0.328321 | 0.004060 |
| T21C9.5    | lpd-9      | chrV   | 0.328155 | 0.000248 |
| M01F1.6    | M01F1.6    | chrIII | 0.328098 | 0.000936 |
| R05H5.3    | R05H5.3    | chrII  | 0.328023 | 0.000174 |
| R144.10    | R144.10    | chrIII | 0.327913 | 0.000713 |
| M01H9.4    | M01H9.4    | chrIV  | 0.327733 | 0.037824 |
| C16B8.3    | C16B8.3    | chrX   | 0.327630 | 0.000476 |
| F46G10.6   | mxl-3      | chrX   | 0.327569 | 0.000813 |
| F13G3.11   | F13G3.11   | chrI   | 0.327475 | 0.000475 |
| F43D9.5    | taf-11.3   | chrIII | 0.327466 | 0.007304 |
| R07E5.7    | R07E5.7    | chrIII | 0.327396 | 0.000249 |
| Y110A2AR.1 | Y110A2AR.1 | chrII  | 0.327326 | 0.000219 |
| C07H6.2    | C07H6.2    | chrIII | 0.327229 | 0.000338 |
| ZC116.1    | ZC116.1    | chrV   | 0.327210 | 0.002860 |
| F59H6.9    | bath-1     | chrII  | 0.327031 | 0.003552 |
| Y47G6A.9   | Y47G6A.9   | chrI   | 0.326873 | 0.000497 |
| T25D10.4   | T25D10.4   | chrII  | 0.326752 | 0.005972 |
| Y54G2A.23  | Y54G2A.23  | chrIV  | 0.326637 | 0.000220 |
| C44C10.9   | C44C10.9   | chrX   | 0.326637 | 0.001059 |
| F56C9.7    | F56C9.7    | chrIII | 0.326559 | 0.000281 |
| C25A1.5    | C25A1.5    | chrI   | 0.326510 | 0.000233 |
| Y54G2A.3   | Y54G2A.3   | chrIV  | 0.326349 | 0.000289 |
| F11C1.1    | F11C1.1    | chrX   | 0.326344 | 0.007760 |
| E04A4.7    | cyc-2.1    | chrIV  | 0.326236 | 0.000179 |
| F41C3.4    | F41C3.4    | chrII  | 0.326192 | 0.000509 |
| Y67D2.3    | Y67D2.3    | chrIII | 0.325999 | 0.000264 |
| Y57A10A.2  | Y57A10A.2  | chrII  | 0.325907 | 0.001366 |
| F26D10.12  | clcc-196   | chrIV  | 0.325842 | 0.001134 |
| ZK652.1    | snr-5      | chrIII | 0.325764 | 0.000246 |
| ZC262.2    | ZC262.2    | chrIII | 0.325759 | 0.000309 |
| F18H3.1    | F18H3.1    | chrX   | 0.325752 | 0.002259 |
| C48B6.2    | C48B6.2    | chrI   | 0.325722 | 0.000551 |
| ZK632.13   | lin-52     | chrIII | 0.325689 | 0.000501 |
| B0280.17   | B0280.17   | chrIII | 0.325630 | 0.024132 |

|            |            |        |          |          |
|------------|------------|--------|----------|----------|
| K11D12.12  | K11D12.12  | chrV   | 0.325531 | 0.005540 |
| F36A2.6    | rps-15     | chrI   | 0.325471 | 0.000175 |
| C25A1.13   | C25A1.13   | chrI   | 0.325228 | 0.000501 |
| F54E7.2    | rps-12     | chrIII | 0.325165 | 0.000179 |
| C50F4.4    | C50F4.4    | chrV   | 0.325155 | 0.002386 |
| Y47D7A.1   | skr-7      | chrV   | 0.325142 | 0.000338 |
| F08G12.3   | F08G12.3   | chrX   | 0.325097 | 0.010177 |
| T12D8.6    | T12D8.6    | chrIII | 0.324846 | 0.000260 |
| T23B12.3   | T23B12.3   | chrV   | 0.324842 | 0.002812 |
| C05D11.10  | C05D11.10  | chrIII | 0.324719 | 0.000511 |
| F25H8.5    | dur-1      | chrIV  | 0.324696 | 0.001352 |
| F57B10.5   | F57B10.5   | chrI   | 0.324219 | 0.000314 |
| R07H5.1    | prx-14     | chrIV  | 0.324151 | 0.000348 |
| F23D12.11  | F23D12.11  | chrX   | 0.323927 | 0.000327 |
| F21A3.3    | F21A3.3    | chrV   | 0.323856 | 0.003997 |
| ZK697.6    | gst-21     | chrV   | 0.323791 | 0.049758 |
| F46E10.8   | ubh-1      | chrV   | 0.323760 | 0.003414 |
| F52E1.1    | pos-1      | chrV   | 0.323692 | 0.000191 |
| C16C10.4   | C16C10.4   | chrIII | 0.323615 | 0.000287 |
| Y32F6A.1   | set-22     | chrV   | 0.323413 | 0.000520 |
| Y57G11B.5  | Y57G11B.5  | chrIV  | 0.323241 | 0.000253 |
| Y37H9A.6   | ndx-4      | chrI   | 0.323190 | 0.001204 |
| T13A10.5   | nlp-16     | chrIV  | 0.323190 | 0.002492 |
| F54E7.7    | rcn-1      | chrIII | 0.322913 | 0.002573 |
| Y41D4A.3   | Y41D4A.3   | chrIV  | 0.322910 | 0.029041 |
| B0410.3    | B0410.3    | chrX   | 0.322588 | 0.001283 |
| F35D11.5   | F35D11.5   | chrII  | 0.322520 | 0.001267 |
| E02H9.8    | nhr-121    | chrIII | 0.322424 | 0.012899 |
| D1009.4    | nlp-14     | chrX   | 0.322408 | 0.005218 |
| ZK488.2    | nhr-90     | chrV   | 0.322310 | 0.033202 |
| Y75B8A.3   | Y75B8A.3   | chrIII | 0.322110 | 0.003611 |
| Y48A6B.9   | Y48A6B.9   | chrIII | 0.322103 | 0.006626 |
| F39G3.5    | F39G3.5    | chrV   | 0.322090 | 0.030325 |
| M110.3     | M110.3     | chrII  | 0.322074 | 0.000444 |
| F10E9.7    | F10E9.7    | chrIII | 0.322005 | 0.000490 |
| Y102A5C.36 | Y102A5C.36 | chrV   | 0.321969 | 0.007217 |
| F43G9.5    | cfim-1     | chrI   | 0.321866 | 0.000356 |
| M04B2.5    | twk-25     | chrIV  | 0.321833 | 0.013707 |
| B0496.7    | valv-1     | chrIV  | 0.321750 | 0.025182 |
| Y37H2A.12  | Y37H2A.12  | chrV   | 0.321556 | 0.002131 |
| F11A10.6   | F11A10.6   | chrIV  | 0.321535 | 0.000872 |
| F45E12.5   | F45E12.5   | chrII  | 0.321519 | 0.000468 |
| C48B4.6    | C48B4.6    | chrIII | 0.321474 | 0.000961 |
| K09E9.1    | K09E9.1    | chrX   | 0.321410 | 0.018608 |
| F16B4.4    | F16B4.4    | chrV   | 0.321347 | 0.000327 |
| F58H1.8    | F58H1.8    | chrV   | 0.321130 | 0.001078 |
| K03H1.7    | K03H1.7    | chrIII | 0.321107 | 0.000558 |
| F13H8.5    | F13H8.5    | chrII  | 0.320893 | 0.024151 |
| F33A8.5    | sdhd-1     | chrII  | 0.320884 | 0.000336 |
| C34D10.1   | C34D10.1   | chrX   | 0.320872 | 0.002213 |
| T09A5.4    | T09A5.4    | chrII  | 0.320871 | 0.024315 |
| C47G2.3    | C47G2.3    | chrII  | 0.320858 | 0.000609 |
| F16F9.4    | F16F9.4    | chrX   | 0.320737 | 0.006780 |
| C44B12.1   | C44B12.1   | chrIV  | 0.320664 | 0.000224 |
| T03F7.7    | T03F7.7    | chrV   | 0.320605 | 0.004633 |
| D2005.7    | D2005.7    | chrI   | 0.320513 | 0.000560 |
| F37H8.5    | F37H8.5    | chrII  | 0.320494 | 0.000340 |
| B0303.15   | B0303.15   | chrIII | 0.320151 | 0.000394 |
| Y47G6A.31  | Y47G6A.31  | chrI   | 0.320146 | 0.007423 |
| C09D4.1    | C09D4.1    | chrI   | 0.320118 | 0.002204 |
| F47G9.1    | F47G9.1    | chrV   | 0.320040 | 0.000289 |
| T23F4.2    | T23F4.2    | chrII  | 0.319983 | 0.046097 |
| K08H2.2    | K08H2.2    | chrX   | 0.319898 | 0.045578 |

|           |           |        |          |          |
|-----------|-----------|--------|----------|----------|
| T22G5.2   | lbp-7     | chrV   | 0.319831 | 0.004934 |
| B0412.2   | daf-7     | chrIII | 0.319756 | 0.016398 |
| W02D9.4   | W02D9.4   | chrI   | 0.319661 | 0.001951 |
| R144.11   | R144.11   | chrIII | 0.319509 | 0.001586 |
| Y39B6A.10 | Y39B6A.10 | chrV   | 0.319451 | 0.000662 |
| B0281.3   | B0281.3   | chrII  | 0.319387 | 0.010257 |
| T07C4.11  | T07C4.11  | chrIII | 0.319020 | 0.014742 |
| R07E5.11  | R07E5.11  | chrIII | 0.318937 | 0.001263 |
| T20F10.2  | T20F10.2  | chrI   | 0.318937 | 0.000834 |
| F23C8.4   | ubxn-1    | chrI   | 0.318730 | 0.000326 |
| F21F8.11  | F21F8.11  | chrV   | 0.318662 | 0.005214 |
| F23H11.1  | bra-2     | chrIII | 0.318438 | 0.000356 |
| B0432.10  | B0432.10  | chrII  | 0.318373 | 0.001084 |
| C18G1.5   | hil-4     | chrV   | 0.318360 | 0.000272 |
| Y74C9A.2  | nlp-40    | chrI   | 0.318353 | 0.000390 |
| Y54G2A.12 | Y54G2A.12 | chrIV  | 0.318273 | 0.000876 |
| C51E3.7   | egl-3     | chrV   | 0.318187 | 0.000467 |
| Y60A3A.19 | Y60A3A.19 | chrV   | 0.318143 | 0.000944 |
| Y55F3AM.5 | Y55F3AM.5 | chrIV  | 0.318019 | 0.002403 |
| Y50D7A.10 | Y50D7A.10 | chrIII | 0.317942 | 0.001306 |
| W02F12.6  | sna-1     | chrV   | 0.317924 | 0.000481 |
| ZK180.4   | sar-1     | chrIV  | 0.317790 | 0.000302 |
| F11G11.3  | gst-6     | chrII  | 0.317783 | 0.015591 |
| T01B11.2  | T01B11.2  | chrIV  | 0.317748 | 0.000564 |
| C07E3.9   | C07E3.9   | chrII  | 0.317659 | 0.004430 |
| F54F7.3   | F54F7.3   | chrX   | 0.317594 | 0.001962 |
| Y48A6B.5  | exos-1    | chrIII | 0.317580 | 0.000731 |
| Y57G11C.8 | Y57G11C.8 | chrIV  | 0.317472 | 0.017179 |
| K10B2.3   | clcc-88   | chrII  | 0.317064 | 0.000281 |
| F54F2.8   | prx-19    | chrIII | 0.317027 | 0.000379 |
| F18G5.6   | F18G5.6   | chrX   | 0.316932 | 0.002787 |
| F53E10.4  | irg-3     | chrV   | 0.316731 | 0.019898 |
| C09E8.3   | mlt-10    | chrII  | 0.316696 | 0.001950 |
| F55A11.1  | F55A11.1  | chrV   | 0.316589 | 0.000344 |
| F56E10.4  | rps-27    | chrV   | 0.316416 | 0.000281 |
| D1086.10  | D1086.10  | chrV   | 0.316392 | 0.000365 |
| C23H3.9   | C23H3.9   | chrII  | 0.316317 | 0.002028 |
| Y54E5B.3  | let-49    | chrI   | 0.316293 | 0.000645 |
| T14B4.3   | T14B4.3   | chrII  | 0.316266 | 0.000547 |
| W07G4.5   | W07G4.5   | chrV   | 0.316245 | 0.001694 |
| R53.5     | R53.5     | chrII  | 0.316245 | 0.000880 |
| T24H10.4  | T24H10.4  | chrII  | 0.316225 | 0.000439 |
| T12B3.4   | T12B3.4   | chrIV  | 0.316158 | 0.000662 |
| T28H10.2  | T28H10.2  | chrV   | 0.316102 | 0.013196 |
| Y58G8A.4  | Y58G8A.4  | chrV   | 0.315982 | 0.008060 |
| B0228.7   | B0228.7   | chrII  | 0.315923 | 0.000838 |
| T09H2.1   | cyp-34A4  | chrV   | 0.315831 | 0.025068 |
| T08A9.9   | spp-5     | chrX   | 0.315713 | 0.000310 |
| T07A9.11  | rps-24    | chrIV  | 0.315704 | 0.000280 |
| H20J04.5  | pdf-2     | chrII  | 0.315606 | 0.000534 |
| ZK1248.19 | ZK1248.19 | chrII  | 0.315527 | 0.004385 |
| Y39B6A.1  | Y39B6A.1  | chrV   | 0.315365 | 0.000301 |
| VC5.2     | VC5.2     | chrV   | 0.315280 | 0.003834 |
| F44G3.6   | skr-3     | chrV   | 0.315262 | 0.002385 |
| T14G10.6  | tsp-12    | chrIV  | 0.315243 | 0.000372 |
| Y48A6B.3  | Y48A6B.3  | chrIII | 0.315241 | 0.000441 |
| C18E9.1   | cal-2     | chrII  | 0.315159 | 0.030191 |
| D1054.10  | D1054.10  | chrV   | 0.314915 | 0.000308 |
| F31D4.9   | F31D4.9   | chrV   | 0.314632 | 0.000509 |
| F26F12.1  | col-140   | chrV   | 0.314524 | 0.000291 |
| R13A5.3   | ttr-32    | chrIII | 0.314376 | 0.010422 |
| T23G11.1  | T23G11.1  | chrI   | 0.314325 | 0.022294 |
| H04D03.1  | H04D03.1  | chrIII | 0.314318 | 0.009347 |

|            |           |        |          |          |
|------------|-----------|--------|----------|----------|
| C08C3.2    | bath-15   | chrIII | 0.314154 | 0.000988 |
| F52C6.8    | bath-4    | chrII  | 0.314025 | 0.013238 |
| D2005.2    | nlp-8     | chrI   | 0.313820 | 0.011500 |
| K01D12.12  | cdr-6     | chrV   | 0.313790 | 0.000600 |
| F35G12.11  | F35G12.11 | chrIII | 0.313751 | 0.000659 |
| ZK856.10   | ZK856.10  | chrV   | 0.313662 | 0.001079 |
| Y53G8AR.5  | Y53G8AR.5 | chrIII | 0.313633 | 0.001574 |
| F28B3.10   | F28B3.10  | chrI   | 0.313531 | 0.000801 |
| C29F9.1    | C29F9.1   | chrIII | 0.313526 | 0.037982 |
| C08F1.6    | C08F1.6   | chrII  | 0.313433 | 0.003795 |
| Y73B6BL.24 | acp-6     | chrIV  | 0.313211 | 0.000338 |
| F55D10.2   | rpl-25.1  | chrX   | 0.313146 | 0.000381 |
| ZK856.7    | ZK856.7   | chrV   | 0.312982 | 0.001900 |
| F46E10.2   | F46E10.2  | chrV   | 0.312933 | 0.001829 |
| M28.5      | M28.5     | chrII  | 0.312802 | 0.000341 |
| F37H8.1    | lir-3     | chrII  | 0.312743 | 0.022474 |
| F44E2.3    | F44E2.3   | chrIII | 0.312719 | 0.000672 |
| Y39A1A.7   | Y39A1A.7  | chrIII | 0.312655 | 0.000626 |
| T01B10.4   | nhr-14    | chrX   | 0.312572 | 0.002437 |
| Y92H12BR.6 | set-29    | chrI   | 0.312517 | 0.001328 |
| T19H12.2   | T19H12.2  | chrV   | 0.312515 | 0.000343 |
| Y47D3A.14  | Y47D3A.14 | chrIII | 0.312510 | 0.001644 |
| F13D12.3   | F13D12.3  | chrII  | 0.312469 | 0.003054 |
| T07F10.4   | bus-19    | chrV   | 0.312294 | 0.026711 |
| C54E4.5    | C54E4.5   | chrIV  | 0.312154 | 0.008005 |
| C01B12.1   | sqt-2     | chrII  | 0.312083 | 0.035256 |
| C17E7.4    | C17E7.4   | chrV   | 0.312070 | 0.000601 |
| F26A3.7    | F26A3.7   | chrI   | 0.312039 | 0.000831 |
| H12D21.7   | H12D21.7  | chrV   | 0.311925 | 0.001593 |
| T09F3.3    | gpd-1     | chrII  | 0.311632 | 0.001026 |
| JC8.14     | ttr-45    | chrIV  | 0.311571 | 0.000909 |
| K07D4.8    | pqn-48    | chrII  | 0.311508 | 0.006339 |
| F30F8.3    | F30F8.3   | chrI   | 0.311466 | 0.000494 |
| F26F4.8    | F26F4.8   | chrIII | 0.311389 | 0.002295 |
| F54F2.9    | F54F2.9   | chrIII | 0.311385 | 0.000791 |
| C47A10.5   | ddo-1     | chrV   | 0.311319 | 0.032148 |
| C01C10.3   | acl-12    | chrX   | 0.311301 | 0.004285 |
| K08E4.3    | K08E4.3   | chrIV  | 0.311239 | 0.002170 |
| C08F8.1    | pdf-1     | chrIV  | 0.311160 | 0.000550 |
| K08C7.6    | K08C7.6   | chrIV  | 0.311082 | 0.011612 |
| ZK593.7    | lsm-7     | chrIV  | 0.311014 | 0.000700 |
| C56G2.15   | C56G2.15  | chrIII | 0.310812 | 0.003787 |
| F22F4.4    | F22F4.4   | chrX   | 0.310752 | 0.001315 |
| C15C7.1    | syx-6     | chrX   | 0.310740 | 0.007704 |
| K03E5.2    | K03E5.2   | chrI   | 0.310717 | 0.001711 |
| Y43F8C.2   | nlp-26    | chrV   | 0.310506 | 0.010313 |
| F29C12.1   | pqn-32    | chrII  | 0.310467 | 0.020822 |
| F52F12.7   | F52F12.7  | chrI   | 0.310435 | 0.000588 |
| T24C4.5    | T24C4.5   | chrIII | 0.310264 | 0.000938 |
| H31G24.3   | H31G24.3  | chrI   | 0.310257 | 0.012140 |
| F09E5.8    | F09E5.8   | chrII  | 0.310136 | 0.001061 |
| F41E7.8    | cnc-8     | chrX   | 0.309643 | 0.002090 |
| W02D9.2    | W02D9.2   | chrI   | 0.309529 | 0.000624 |
| C30E1.9    | C30E1.9   | chrX   | 0.309512 | 0.000934 |
| F13A2.4    | F13A2.4   | chrV   | 0.309349 | 0.024960 |
| Y49E10.6   | his-72    | chrIII | 0.309347 | 0.000443 |
| T10B5.6    | knl-3     | chrV   | 0.309179 | 0.000525 |
| R144.4     | wip-1     | chrIII | 0.309151 | 0.000570 |
| C27B7.1    | spr-2     | chrIV  | 0.309126 | 0.000458 |
| F52F12.4   | lsl-1     | chrI   | 0.309051 | 0.000596 |
| F46F11.4   | ubl-5     | chrI   | 0.309021 | 0.001369 |
| C03B1.12   | lmp-1     | chrX   | 0.308997 | 0.000464 |
| W01G7.3    | rpb-11    | chrII  | 0.308832 | 0.000855 |

|           |           |        |          |          |
|-----------|-----------|--------|----------|----------|
| K11D12.11 | K11D12.11 | chrV   | 0.308647 | 0.045347 |
| C37C3.13  | ttr-33    | chrV   | 0.308400 | 0.019191 |
| C17H12.11 | C17H12.11 | chrIV  | 0.308392 | 0.022829 |
| T20G5.14  | T20G5.14  | chrIII | 0.308309 | 0.000695 |
| B0035.3   | B0035.3   | chrIV  | 0.308152 | 0.000709 |
| C02D5.2   | C02D5.2   | chrIII | 0.308043 | 0.022116 |
| C30F12.7  | C30F12.7  | chrI   | 0.308013 | 0.002121 |
| T03F1.2   | coq-4     | chrI   | 0.307856 | 0.003096 |
| K05F6.1   | fbxb-49   | chrII  | 0.307793 | 0.029229 |
| R10E11.2  | vha-2     | chrIII | 0.307744 | 0.000423 |
| Y51A2D.13 | Y51A2D.13 | chrV   | 0.307718 | 0.001683 |
| ZK546.15  | try-1     | chrII  | 0.307687 | 0.000774 |
| K05B2.2   | K05B2.2   | chrX   | 0.307482 | 0.003242 |
| C46C2.5   | C46C2.5   | chrIV  | 0.307480 | 0.008028 |
| F37H8.2   | F37H8.2   | chrII  | 0.307479 | 0.024614 |
| F23H11.5  | F23H11.5  | chrIII | 0.307459 | 0.000497 |
| C10B5.3   | C10B5.3   | chrV   | 0.307389 | 0.004819 |
| C14C10.2  | C14C10.2  | chrV   | 0.307258 | 0.006464 |
| F40F12.7  | F40F12.7  | chrIII | 0.307202 | 0.024304 |
| F35C8.5   | F35C8.5   | chrX   | 0.307109 | 0.002145 |
| B0252.1   | B0252.1   | chrII  | 0.306988 | 0.025539 |
| F41G3.14  | exos-8    | chrII  | 0.306802 | 0.001066 |
| C31G12.1  | C31G12.1  | chrV   | 0.306718 | 0.022037 |
| F54E7.8   | F54E7.8   | chrIII | 0.306632 | 0.000737 |
| M01D1.3   | btb-11    | chrII  | 0.306533 | 0.010333 |
| H23N18.1  | ugt-13    | chrV   | 0.306417 | 0.002851 |
| F39B2.2   | uev-1     | chrI   | 0.306391 | 0.000588 |
| M02H5.6   | nhr-98    | chrV   | 0.306238 | 0.046739 |
| F21G4.4   | F21G4.4   | chrX   | 0.306109 | 0.008248 |
| Y52B11A.9 | Y52B11A.9 | chrI   | 0.306004 | 0.000752 |
| Y56A3A.18 | Y56A3A.18 | chrIII | 0.305932 | 0.001141 |
| T23G11.4  | T23G11.4  | chrI   | 0.305721 | 0.001002 |
| ZK863.8   | ZK863.8   | chrV   | 0.305625 | 0.038810 |
| F19B10.1  | F19B10.1  | chrII  | 0.305617 | 0.003903 |
| C34B2.5   | C34B2.5   | chrI   | 0.305615 | 0.001105 |
| F31E8.4   | F31E8.4   | chrII  | 0.305475 | 0.002165 |
| M176.3    | chch-3    | chrII  | 0.305374 | 0.000735 |
| K11H12.1  | K11H12.1  | chrIV  | 0.305340 | 0.003169 |
| R05D7.5   | R05D7.5   | chrI   | 0.305339 | 0.003393 |
| K08D12.3  | K08D12.3  | chrIV  | 0.305262 | 0.000489 |
| Y73F8A.27 | Y73F8A.27 | chrIV  | 0.305259 | 0.001036 |
| Y48G1C.6  | Y48G1C.6  | chrI   | 0.304981 | 0.015534 |
| H35N09.2  | H35N09.2  | chrX   | 0.304962 | 0.047972 |
| F28C6.8   | F28C6.8   | chrII  | 0.304900 | 0.000953 |
| C27B7.8   | rap-1     | chrIV  | 0.304860 | 0.000584 |
| T01B7.4   | cyn-11    | chrII  | 0.304790 | 0.001060 |
| F15D3.7   | F15D3.7   | chrI   | 0.304717 | 0.000709 |
| Y39A1A.21 | Y39A1A.21 | chrIII | 0.304661 | 0.001544 |
| T01C3.6   | rps-16    | chrV   | 0.304507 | 0.000478 |
| W06A7.2   | W06A7.2   | chrV   | 0.304345 | 0.013872 |
| H35B03.2  | H35B03.2  | chrIV  | 0.304262 | 0.000945 |
| T20G5.4   | T20G5.4   | chrIII | 0.304204 | 0.021593 |
| C18E3.9   | C18E3.9   | chrI   | 0.304171 | 0.001006 |
| T23H2.5   | rab-10    | chrI   | 0.304167 | 0.000594 |
| F43D2.1   | F43D2.1   | chrV   | 0.304138 | 0.000825 |
| W06D12.2  | twk-42    | chrV   | 0.304095 | 0.024421 |
| C47A4.1   | C47A4.1   | chrIV  | 0.304088 | 0.027640 |
| K07C11.5  | cri-2     | chrV   | 0.303826 | 0.004706 |
| Y37D8A.14 | cco-2     | chrIII | 0.303771 | 0.000521 |
| C06E2.5   | C06E2.5   | chrX   | 0.303697 | 0.002854 |
| K08E3.10  | K08E3.10  | chrIII | 0.303686 | 0.002881 |
| W02D9.6   | W02D9.6   | chrI   | 0.303644 | 0.004220 |
| C35A5.6   | C35A5.6   | chrV   | 0.303632 | 0.040998 |

|            |            |        |          |          |
|------------|------------|--------|----------|----------|
| F11E6.1    | F11E6.1    | chrIV  | 0.303474 | 0.006641 |
| C53H9.1    | rpl-27     | chrI   | 0.303457 | 0.000502 |
| Y51A2D.9   | ttr-24     | chrV   | 0.303319 | 0.000968 |
| C43F9.9    | lgc-43     | chrIV  | 0.303259 | 0.026868 |
| T26A5.9    | dlc-1      | chrIII | 0.303204 | 0.000544 |
| F15H10.3   | apc-10     | chrV   | 0.303192 | 0.001552 |
| K01G5.10   | K01G5.10   | chrIII | 0.303139 | 0.017705 |
| F28C10.3   | F28C10.3   | chrX   | 0.303069 | 0.002836 |
| Y41C4A.12  | Y41C4A.12  | chrIII | 0.303026 | 0.033464 |
| Y56A3A.11  | Y56A3A.11  | chrIII | 0.302705 | 0.001950 |
| F44E2.9    | F44E2.9    | chrIII | 0.302701 | 0.003729 |
| K09H9.8    | K09H9.8    | chrI   | 0.302697 | 0.029665 |
| E02H1.5    | E02H1.5    | chrII  | 0.302608 | 0.001365 |
| F57B1.9    | F57B1.9    | chrV   | 0.302544 | 0.043368 |
| Y17G9B.9   | Y17G9B.9   | chrIV  | 0.302495 | 0.000885 |
| B0365.5    | clcc-225   | chrV   | 0.302413 | 0.035433 |
| T10B5.4    | T10B5.4    | chrV   | 0.302225 | 0.039898 |
| C06A5.11   | sir-2.4    | chrI   | 0.302187 | 0.001913 |
| Y65B4BL.3  | Y65B4BL.3  | chrI   | 0.302164 | 0.002403 |
| C54C6.6    | C54C6.6    | chrIII | 0.302103 | 0.002100 |
| F10A3.4    | F10A3.4    | chrV   | 0.302055 | 0.032963 |
| Y4C6A.3    | Y4C6A.3    | chrIV  | 0.302025 | 0.000947 |
| F52H3.4    | F52H3.4    | chrII  | 0.301948 | 0.001584 |
| F59G1.8    | F59G1.8    | chrII  | 0.301943 | 0.001977 |
| T12D8.4    | arrd-17    | chrIII | 0.301866 | 0.012568 |
| D1086.11   | D1086.11   | chrV   | 0.301825 | 0.000662 |
| K02A11.4   | K02A11.4   | chrI   | 0.301775 | 0.026847 |
| B0035.4    | pdf-4      | chrIV  | 0.301745 | 0.000849 |
| C41C4.10   | sfxn-5     | chrII  | 0.301710 | 0.004929 |
| C36H8.2    | inx-6      | chrIV  | 0.301701 | 0.036350 |
| F35G12.9   | apc-11     | chrIII | 0.301606 | 0.001271 |
| F28F8.6    | atx-3      | chrV   | 0.301384 | 0.000988 |
| Y37E11AR.6 | vab-2      | chrIV  | 0.301270 | 0.009111 |
| Y60A3A.8   | Y60A3A.8   | chrV   | 0.301143 | 0.006339 |
| Y106G6H.14 | Y106G6H.14 | chrI   | 0.301108 | 0.001423 |
| ZK688.6    | pcp-5      | chrIII | 0.301071 | 0.001432 |
| T05A1.2    | col-122    | chrIV  | 0.300985 | 0.000551 |
| Y59A8B.13  | slr-2      | chrV   | 0.300961 | 0.001698 |
| F59H6.12   | btb-4      | chrII  | 0.300803 | 0.022084 |
| C14A4.6    | C14A4.6    | chrII  | 0.300782 | 0.011040 |
| T24B8.1    | rpl-32     | chrII  | 0.300747 | 0.000567 |
| T27D1.1    | cyn-9      | chrIII | 0.300607 | 0.001083 |
| H06I04.4   | ubl-1      | chrIII | 0.300521 | 0.000577 |
| ZK520.5    | cyn-2      | chrIII | 0.300514 | 0.016862 |
| F25B4.8    | F25B4.8    | chrV   | 0.300425 | 0.023874 |
| B0564.2    | B0564.2    | chrIV  | 0.300355 | 0.003348 |
| Y37D8A.18  | Y37D8A.18  | chrIII | 0.300309 | 0.001961 |
| C06A8.4    | skr-17     | chrII  | 0.300245 | 0.001054 |
| T14G10.3   | ttr-53     | chrIV  | 0.300137 | 0.001027 |
| W10D9.6    | W10D9.6    | chrII  | 0.300065 | 0.004471 |
| F54D8.2    | tag-174    | chrIII | 0.299953 | 0.000664 |
| C29E4.13   | C29E4.13   | chrIII | 0.299891 | 0.001816 |
| ZK1010.1   | ubq-2      | chrIII | 0.299839 | 0.000595 |
| ZK265.6    | ZK265.6    | chrI   | 0.299721 | 0.000948 |
| C48D5.2    | ptp-1      | chrIII | 0.299661 | 0.002203 |
| C10H11.3   | ugt-25     | chrI   | 0.299656 | 0.007594 |
| F33C8.4    | F33C8.4    | chrX   | 0.299348 | 0.020805 |
| F58A4.10   | ubc-7      | chrIII | 0.299321 | 0.000667 |
| K07C5.5    | ceeh-2     | chrV   | 0.299171 | 0.013473 |
| Y53C12A.3  | Y53C12A.3  | chrII  | 0.299106 | 0.001242 |
| F14H12.4   | cst-1      | chrX   | 0.298963 | 0.008883 |
| Y37E11AR.1 | Y37E11AR.1 | chrIV  | 0.298942 | 0.020395 |
| W02D7.2    | clcc-218   | chrV   | 0.298887 | 0.000991 |

|            |            |        |          |          |
|------------|------------|--------|----------|----------|
| C34D4.12   | cyn-12     | chrIV  | 0.298864 | 0.001198 |
| R01B10.1   | cpi-2      | chrV   | 0.298826 | 0.000800 |
| C10G11.8   | C10G11.8   | chrI   | 0.298744 | 0.013702 |
| C53C9.2    | C53C9.2    | chrX   | 0.298515 | 0.001192 |
| M01E11.1   | M01E11.1   | chrI   | 0.298439 | 0.001791 |
| F36F2.1    | F36F2.1    | chrI   | 0.298437 | 0.022735 |
| R12E2.13   | R12E2.13   | chrI   | 0.298369 | 0.000971 |
| T15B7.3    | col-143    | chrV   | 0.298344 | 0.000651 |
| F22E10.5   | F22E10.5   | chrX   | 0.298278 | 0.001153 |
| F53F4.3    | F53F4.3    | chrV   | 0.298098 | 0.001006 |
| F53E10.1   | F53E10.1   | chrV   | 0.297902 | 0.002822 |
| F42A8.3    | F42A8.3    | chrII  | 0.297699 | 0.001306 |
| T06D8.7    | T06D8.7    | chrII  | 0.297657 | 0.001293 |
| C14A4.1    | tag-242    | chrII  | 0.297598 | 0.002203 |
| E03G2.3    | mec-5      | chrX   | 0.297589 | 0.002374 |
| ZK1320.3   | ZK1320.3   | chrII  | 0.297510 | 0.001410 |
| F58E10.7   | F58E10.7   | chrV   | 0.297451 | 0.028049 |
| ZK616.5    | ZK616.5    | chrIV  | 0.297428 | 0.001242 |
| F58A4.3    | hcp-3      | chrIII | 0.297384 | 0.000911 |
| F07A5.2    | F07A5.2    | chrI   | 0.297194 | 0.037921 |
| K11H3.4    | K11H3.4    | chrIII | 0.297119 | 0.001879 |
| Y38H6C.1   | dct-16     | chrV   | 0.296918 | 0.000692 |
| F53F10.4   | unc-108    | chrI   | 0.296889 | 0.000795 |
| R08C7.3    | htz-1      | chrIV  | 0.296795 | 0.000709 |
| Y10G11A.1  | Y10G11A.1  | chrIV  | 0.296771 | 0.001073 |
| Y65B4A.2   | Y65B4A.2   | chrI   | 0.296757 | 0.049468 |
| F55H2.1    | sod-4      | chrIII | 0.296695 | 0.012030 |
| F07H5.5    | F07H5.5    | chrII  | 0.296637 | 0.000716 |
| Y73C8C.8   | Y73C8C.8   | chrV   | 0.296519 | 0.010857 |
| F56C11.5   | F56C11.5   | chrI   | 0.296459 | 0.001894 |
| Y62E10A.12 | lsm-3      | chrIV  | 0.296319 | 0.001546 |
| R11D1.8    | rpl-28     | chrV   | 0.296308 | 0.000726 |
| F44D12.9   | F44D12.9   | chrIV  | 0.296283 | 0.005116 |
| Y54G9A.7   | Y54G9A.7   | chrII  | 0.296223 | 0.001482 |
| Y54F10AR.2 | Y54F10AR.2 | chrIII | 0.295932 | 0.002169 |
| F18A12.8   | F18A12.8   | chrII  | 0.295914 | 0.022287 |
| T11F9.3    | nas-20     | chrV   | 0.295893 | 0.002515 |
| ZK470.2    | ZK470.2    | chrX   | 0.295875 | 0.001567 |
| C18E9.9    | C18E9.9    | chrII  | 0.295579 | 0.005801 |
| F19F10.5   | F19F10.5   | chrV   | 0.295546 | 0.029579 |
| K04G2.9    | K04G2.9    | chrI   | 0.295449 | 0.005316 |
| T16G1.10   | pqn-68     | chrV   | 0.295378 | 0.010257 |
| R04A9.9    | R04A9.9    | chrX   | 0.295377 | 0.026170 |
| K10B3.9    | mai-1      | chrX   | 0.295373 | 0.012676 |
| F02D8.4    | F02D8.4    | chrV   | 0.295347 | 0.002961 |
| Y41C4A.8   | Y41C4A.8   | chrIII | 0.295318 | 0.029108 |
| T20D3.2    | T20D3.2    | chrIV  | 0.295160 | 0.000944 |
| B0024.13   | B0024.13   | chrV   | 0.295100 | 0.001364 |
| W02G9.4    | W02G9.4    | chrV   | 0.295038 | 0.005316 |
| F52H2.5    | F52H2.5    | chrX   | 0.295007 | 0.007384 |
| B0564.11   | B0564.11   | chrIV  | 0.294927 | 0.001440 |
| W02D9.5    | W02D9.5    | chrI   | 0.294886 | 0.040643 |
| C34F6.4    | hst-2      | chrX   | 0.294848 | 0.004550 |
| F58A6.1    | F58A6.1    | chrII  | 0.294843 | 0.008594 |
| C35D10.1   | C35D10.1   | chrIII | 0.294742 | 0.001118 |
| ZC204.2    | ZC204.2    | chrII  | 0.294621 | 0.002422 |
| Y57A10B.3  | btb-14     | chrII  | 0.294611 | 0.005274 |
| Y48G8AL.13 | Y48G8AL.13 | chrI   | 0.294569 | 0.001236 |
| F21C10.9   | F21C10.9   | chrV   | 0.294447 | 0.000926 |
| M88.7      | M88.7      | chrIII | 0.294408 | 0.001464 |
| Y111B2A.20 | hut-1      | chrIII | 0.294352 | 0.001370 |
| F08C6.6    | apy-1      | chrX   | 0.294010 | 0.001132 |
| ZK353.9    | ZK353.9    | chrIII | 0.293950 | 0.001711 |

|            |            |        |          |          |
|------------|------------|--------|----------|----------|
| T03F6.2    | dnj-17     | chrIII | 0.293867 | 0.001267 |
| R119.3     | R119.3     | chrI   | 0.293849 | 0.003393 |
| Y71F9AL.5  | gst-43     | chrI   | 0.293620 | 0.021526 |
| C03E10.5   | clcc-223   | chrV   | 0.293616 | 0.001881 |
| T07H6.3    | col-166    | chrX   | 0.293580 | 0.006136 |
| R05G6.4    | R05G6.4    | chrIV  | 0.293432 | 0.002631 |
| R151.6     | R151.6     | chrIII | 0.293383 | 0.001593 |
| F27D9.2    | F27D9.2    | chrX   | 0.293179 | 0.030528 |
| F21A3.2    | F21A3.2    | chrV   | 0.293166 | 0.011162 |
| K07A1.6    | K07A1.6    | chrI   | 0.293108 | 0.004747 |
| Y66D12A.20 | spe-6      | chrIII | 0.293108 | 0.043566 |
| C09F5.2    | orai-1     | chrIII | 0.293050 | 0.002312 |
| E04F6.4    | E04F6.4    | chrII  | 0.292852 | 0.025843 |
| R144.9     | mdt-11     | chrIII | 0.292581 | 0.002278 |
| Y116A8C.42 | snr-1      | chrIV  | 0.292577 | 0.000970 |
| W09C5.6    | rpl-31     | chrI   | 0.292573 | 0.000829 |
| F01G4.5    | F01G4.5    | chrIV  | 0.292363 | 0.003877 |
| T13B5.3    | pho-14     | chrII  | 0.292363 | 0.001791 |
| T07C12.9   | T07C12.9   | chrV   | 0.292347 | 0.006481 |
| T28D9.2    | rsp-5      | chrII  | 0.292281 | 0.001139 |
| ZK1128.7   | ZK1128.7   | chrIII | 0.292219 | 0.033821 |
| Y73B6BL.32 | lsm-8      | chrIV  | 0.292126 | 0.001376 |
| F01D4.4    | egl-21     | chrIV  | 0.292081 | 0.001616 |
| F31F6.2    | F31F6.2    | chrX   | 0.292033 | 0.007937 |
| F35H12.5   | F35H12.5   | chrX   | 0.291824 | 0.020360 |
| ZK1098.5   | ZK1098.5   | chrIII | 0.291726 | 0.002373 |
| K12H4.4    | K12H4.4    | chrIII | 0.291667 | 0.001263 |
| C50E3.13   | C50E3.13   | chrV   | 0.291379 | 0.001933 |
| D1086.1    | D1086.1    | chrV   | 0.291218 | 0.044527 |
| B0304.2    | B0304.2    | chrII  | 0.291008 | 0.001845 |
| F26H11.5   | exl-1      | chrII  | 0.290990 | 0.002544 |
| C48B4.10   | C48B4.10   | chrIII | 0.290975 | 0.002100 |
| C25G4.6    | C25G4.6    | chrIV  | 0.290974 | 0.026868 |
| T07F12.2   | T07F12.2   | chrX   | 0.290967 | 0.002751 |
| E01G6.2    | E01G6.2    | chrX   | 0.290926 | 0.048819 |
| R12C12.9   | R12C12.9   | chrII  | 0.290898 | 0.007443 |
| F11E6.3    | F11E6.3    | chrIV  | 0.290630 | 0.001042 |
| T23D8.6    | his-68     | chrI   | 0.290604 | 0.015247 |
| Y48C3A.10  | Y48C3A.10  | chrII  | 0.290596 | 0.001915 |
| C25A1.1    | C25A1.1    | chrI   | 0.290593 | 0.001525 |
| Y53F4B.33  | gst-39     | chrII  | 0.290498 | 0.014039 |
| K06H7.9    | idi-1      | chrIII | 0.290479 | 0.001761 |
| F26F4.11   | rpb-8      | chrIII | 0.290477 | 0.001309 |
| K07H8.9    | K07H8.9    | chrIV  | 0.290296 | 0.002679 |
| K08B12.3   | K08B12.3   | chrV   | 0.290246 | 0.022634 |
| F53C11.3   | F53C11.3   | chrV   | 0.290182 | 0.001352 |
| H01M10.3   | ttr-42     | chrX   | 0.290149 | 0.002566 |
| Y54G2A.45  | Y54G2A.45  | chrIV  | 0.290071 | 0.005798 |
| T24C2.2    | T24C2.2    | chrX   | 0.290056 | 0.018719 |
| F48D6.4    | F48D6.4    | chrX   | 0.289975 | 0.001523 |
| F52A8.5    | F52A8.5    | chrI   | 0.289774 | 0.001624 |
| E02H1.6    | E02H1.6    | chrII  | 0.289630 | 0.003584 |
| F28B3.5    | F28B3.5    | chrI   | 0.289388 | 0.001437 |
| F32D8.12   | F32D8.12   | chrV   | 0.289316 | 0.001379 |
| Y66D12A.21 | Y66D12A.21 | chrIII | 0.289179 | 0.002684 |
| C33H5.15   | sgo-1      | chrIV  | 0.289173 | 0.001602 |
| C41G11.1   | C41G11.1   | chrX   | 0.289043 | 0.006018 |
| F16H11.3   | F16H11.3   | chrX   | 0.288774 | 0.002674 |
| D2063.1    | D2063.1    | chrV   | 0.288749 | 0.020590 |
| Y73B6BL.27 | Y73B6BL.27 | chrIV  | 0.288744 | 0.006825 |
| B0302.5    | B0302.5    | chrX   | 0.288720 | 0.007794 |
| F26E4.6    | F26E4.6    | chrI   | 0.288432 | 0.001174 |
| W02D3.7    | lbp-5      | chrI   | 0.288338 | 0.004747 |



|            |           |        |          |          |
|------------|-----------|--------|----------|----------|
| D1022.4    | D1022.4   | chrII  | 0.288304 | 0.003842 |
| F08B6.3    | F08B6.3   | chrI   | 0.288215 | 0.006825 |
| Y66D12A.8  | Y66D12A.8 | chrIII | 0.288182 | 0.001556 |
| ZK858.3    | clec-91   | chrI   | 0.288177 | 0.001126 |
| K09D9.12   | K09D9.12  | chrV   | 0.288146 | 0.016238 |
| R04B5.4    | nhr-12    | chrV   | 0.288133 | 0.004933 |
| Y73B6BL.3  | exos-2    | chrIV  | 0.288040 | 0.002151 |
| C54D10.3   | C54D10.3  | chrV   | 0.288001 | 0.002566 |
| F40F9.2    | tag-120   | chrV   | 0.287966 | 0.010052 |
| C29F7.5    | fkf-4     | chrX   | 0.287960 | 0.006926 |
| ZC262.8    | ZC262.8   | chrIII | 0.287828 | 0.002274 |
| T12D8.2    | drr-2     | chrIII | 0.287825 | 0.001268 |
| Y48G8AL.14 | aps-3     | chrI   | 0.287813 | 0.001894 |
| Y23H5A.1   | Y23H5A.1  | chrI   | 0.287732 | 0.020287 |
| F46C5.8    | rer-1     | chrII  | 0.287656 | 0.001595 |
| B0361.9    | B0361.9   | chrIII | 0.287594 | 0.004277 |
| Y17G9B.4   | Y17G9B.4  | chrIV  | 0.287479 | 0.011795 |
| F56H11.4   | elo-1     | chrIV  | 0.287425 | 0.001093 |
| C33F10.14  | C33F10.14 | chrII  | 0.287408 | 0.002482 |
| ZK418.8    | ZK418.8   | chrIII | 0.287386 | 0.002364 |
| R11E3.2    | R11E3.2   | chrIV  | 0.287355 | 0.038023 |
| Y65A5A.1   | Y65A5A.1  | chrIV  | 0.287320 | 0.010444 |
| R11D1.9    | R11D1.9   | chrV   | 0.286932 | 0.004720 |
| C34C12.7   | C34C12.7  | chrIII | 0.286749 | 0.026963 |
| F32E10.2   | F32E10.2  | chrIV  | 0.286721 | 0.001696 |
| M01D1.8    | fbxb-41   | chrII  | 0.286651 | 0.026034 |
| T11F8.1    | T11F8.1   | chrIV  | 0.286616 | 0.004822 |
| Y44A6E.1   | pbo-5     | chrV   | 0.286546 | 0.042929 |
| F38A6.5    | F38A6.5   | chrV   | 0.286536 | 0.036241 |
| F35B12.9   | F35B12.9  | chrV   | 0.286449 | 0.011114 |
| B0414.3    | hil-5     | chrI   | 0.286378 | 0.001176 |
| C52E12.6   | C52E12.6  | chrII  | 0.286191 | 0.038184 |
| T06C10.4   | flp-10    | chrIV  | 0.285947 | 0.013573 |
| F42A10.6   | F42A10.6  | chrIII | 0.285896 | 0.002626 |
| T15H9.2    | T15H9.2   | chrII  | 0.285775 | 0.003033 |
| B0222.6    | col-144   | chrV   | 0.285762 | 0.015776 |
| R13A5.9    | R13A5.9   | chrIII | 0.285746 | 0.036506 |
| F13G3.4    | dylt-1    | chrI   | 0.285745 | 0.001631 |
| F11E6.5    | elo-2     | chrIV  | 0.285735 | 0.001318 |
| ZC434.4    | ZC434.4   | chrI   | 0.285707 | 0.001752 |
| ZC64.2     | ttr-48    | chrX   | 0.285706 | 0.003889 |
| C42C1.15   | erl-1     | chrIV  | 0.285622 | 0.002977 |
| Y73F4A.1   | Y73F4A.1  | chrIV  | 0.285576 | 0.011810 |
| Y39B6A.37  | Y39B6A.37 | chrV   | 0.285566 | 0.002072 |
| K08D10.4   | rnp-2     | chrIV  | 0.285453 | 0.002387 |
| Y34B4A.3   | hst-6     | chrX   | 0.285407 | 0.005579 |
| T14G11.1   | T14G11.1  | chrX   | 0.285194 | 0.010743 |
| C09G5.4    | col-39    | chrII  | 0.285169 | 0.002436 |
| C41G7.3    | C41G7.3   | chrI   | 0.285091 | 0.001605 |
| F09B9.4    | F09B9.4   | chrX   | 0.285090 | 0.006920 |
| C25G4.2    | C25G4.2   | chrIV  | 0.285032 | 0.003370 |
| F43E2.1    | F43E2.1   | chrII  | 0.284984 | 0.003791 |
| ZK637.2    | ZK637.2   | chrIII | 0.284946 | 0.001777 |
| F26D11.1   | F26D11.1  | chrV   | 0.284898 | 0.015147 |
| W05E7.1    | grd-3     | chrIV  | 0.284743 | 0.001616 |
| T07A9.1    | pqbp-1.2  | chrIV  | 0.284542 | 0.037501 |
| K12H6.2    | K12H6.2   | chrII  | 0.284506 | 0.019276 |
| K02F2.4    | ulp-5     | chrI   | 0.284382 | 0.005290 |
| W03F8.1    | tni-4     | chrIV  | 0.284309 | 0.002278 |
| K10B2.4    | K10B2.4   | chrII  | 0.284272 | 0.002789 |
| R01H2.6    | ubc-18    | chrIII | 0.284167 | 0.001392 |
| C45G3.3    | gip-2     | chrI   | 0.284157 | 0.004493 |
| W06A7.4    | W06A7.4   | chrV   | 0.284110 | 0.010632 |

|            |           |        |          |          |
|------------|-----------|--------|----------|----------|
| F52C9.7    | F52C9.7   | chrIII | 0.284052 | 0.001508 |
| F40F8.1    | F40F8.1   | chrII  | 0.284032 | 0.001689 |
| C06H2.7    | C06H2.7   | chrV   | 0.283781 | 0.003175 |
| Y51A2D.10  | ttr-25    | chrV   | 0.283681 | 0.005107 |
| R186.7     | R186.7    | chrV   | 0.283346 | 0.001738 |
| C07G1.8    | glrx-22   | chrIV  | 0.283311 | 0.003124 |
| Y47D7A.14  | Y47D7A.14 | chrV   | 0.283261 | 0.002967 |
| C17E7.12   | C17E7.12  | chrV   | 0.282964 | 0.005954 |
| F13B9.8    | fis-2     | chrX   | 0.282925 | 0.004024 |
| ZK512.7    | ZK512.7   | chrIII | 0.282750 | 0.002100 |
| ZK1320.7   | ZK1320.7  | chrII  | 0.282582 | 0.003711 |
| Y54G2A.50  | Y54G2A.50 | chrIV  | 0.282562 | 0.005844 |
| Y34B4A.4   | Y34B4A.4  | chrX   | 0.282342 | 0.029703 |
| T05H4.11   | T05H4.11  | chrV   | 0.282285 | 0.001738 |
| T14G10.4   | ttr-54    | chrIV  | 0.282153 | 0.041714 |
| T27A3.6    | T27A3.6   | chrI   | 0.282140 | 0.003528 |
| C04F12.4   | rpl-14    | chrI   | 0.282107 | 0.001313 |
| T07C12.7   | ttr-46    | chrV   | 0.282083 | 0.001841 |
| ZK892.2    | nlt-1     | chrII  | 0.281971 | 0.002953 |
| VF39H2L.1  | syx-17    | chrI   | 0.281898 | 0.003459 |
| F42G10.1   | F42G10.1  | chrX   | 0.281891 | 0.004576 |
| Y105C5B.9  | Y105C5B.9 | chrIV  | 0.281836 | 0.018549 |
| EEED8.4    | EEED8.4   | chrII  | 0.281834 | 0.025347 |
| F52E1.14   | F52E1.14  | chrV   | 0.281663 | 0.002276 |
| ZK1236.5   | ZK1236.5  | chrIII | 0.281580 | 0.011404 |
| K10B3.1    | K10B3.1   | chrX   | 0.281333 | 0.017808 |
| C01G5.5    | C01G5.5   | chrIV  | 0.281121 | 0.004213 |
| C44B12.5   | C44B12.5  | chrIV  | 0.281085 | 0.001375 |
| PAR2.1     | mtss-1    | chrIII | 0.280694 | 0.002000 |
| E02H1.8    | E02H1.8   | chrII  | 0.280599 | 0.005301 |
| C49F5.7    | C49F5.7   | chrX   | 0.280591 | 0.003101 |
| C06G8.2    | pept-2    | chrIV  | 0.280506 | 0.007915 |
| Y43F11A.6  | Y43F11A.6 | chrII  | 0.280472 | 0.005305 |
| C26D10.3   | C26D10.3  | chrII  | 0.280471 | 0.029447 |
| ZK1128.4   | ZK1128.4  | chrIII | 0.280463 | 0.002694 |
| F59A3.4    | F59A3.4   | chrI   | 0.280416 | 0.001945 |
| Y51B9A.4   | arrd-2    | chrII  | 0.280324 | 0.008966 |
| F23B2.6    | aly-2     | chrIV  | 0.280289 | 0.001555 |
| C45G9.7    | C45G9.7   | chrIII | 0.280222 | 0.016870 |
| F54B11.6   | bra-1     | chrX   | 0.280074 | 0.010749 |
| C05D2.11   | C05D2.11  | chrIII | 0.279962 | 0.012843 |
| Y53G8B.1   | Y53G8B.1  | chrIII | 0.279858 | 0.036153 |
| T27F6.7    | T27F6.7   | chrI   | 0.279811 | 0.003612 |
| F38B2.1    | ifa-1     | chrX   | 0.279692 | 0.002484 |
| F32A5.9    | F32A5.9   | chrII  | 0.279625 | 0.028425 |
| Y73B3A.1   | Y73B3A.1  | chrX   | 0.279616 | 0.003161 |
| F42C5.7    | grl-4     | chrIV  | 0.279585 | 0.004112 |
| C09B7.2    | C09B7.2   | chrX   | 0.279572 | 0.014706 |
| F10G7.3    | unc-85    | chrII  | 0.279531 | 0.001905 |
| W02D9.10   | W02D9.10  | chrI   | 0.279503 | 0.029437 |
| ZK353.7    | cutc-1    | chrIII | 0.279481 | 0.002085 |
| F48E3.4    | F48E3.4   | chrX   | 0.279415 | 0.001796 |
| C18D11.1   | C18D11.1  | chrIII | 0.279306 | 0.007289 |
| ZK1236.7   | ZK1236.7  | chrIII | 0.279300 | 0.001968 |
| F19H6.1    | nekl-3    | chrX   | 0.279206 | 0.027876 |
| ZK863.6    | dpy-30    | chrV   | 0.279174 | 0.001814 |
| C16C10.10  | glod-4    | chrIII | 0.279162 | 0.003349 |
| ZK637.9    | tpk-1     | chrIII | 0.279127 | 0.039686 |
| F35C5.5    | clec-62   | chrII  | 0.279100 | 0.009255 |
| F36D1.1    | F36D1.1   | chrI   | 0.279034 | 0.017206 |
| Y18D10A.20 | pfn-1     | chrI   | 0.279018 | 0.001591 |
| Y102A5C.2  | Y102A5C.2 | chrV   | 0.278928 | 0.013133 |
| Y54G2A.39  | clec-80   | chrIV  | 0.278860 | 0.027124 |

|            |           |        |          |          |
|------------|-----------|--------|----------|----------|
| C53C7.5    | C53C7.5   | chrX   | 0.278791 | 0.011903 |
| H03A11.2   | H03A11.2  | chrX   | 0.278725 | 0.028450 |
| F23C8.6    | F23C8.6   | chrI   | 0.278600 | 0.002110 |
| F22B5.10   | F22B5.10  | chrII  | 0.278554 | 0.002100 |
| F08D12.3   | F08D12.3  | chrII  | 0.278540 | 0.019699 |
| Y34D9A.11  | spp-23    | chrI   | 0.278416 | 0.005238 |
| T09B9.1    | T09B9.1   | chrX   | 0.278390 | 0.003137 |
| T06D8.9    | T06D8.9   | chrII  | 0.278338 | 0.001966 |
| C10H11.10  | kca-1     | chrI   | 0.278303 | 0.002011 |
| C02D5.4    | C02D5.4   | chrIII | 0.278192 | 0.003464 |
| K01G5.2    | hpl-2     | chrIII | 0.278169 | 0.002250 |
| H20E11.1   | H20E11.1  | chrIV  | 0.278122 | 0.026107 |
| Y116A8C.28 | bca-2     | chrIV  | 0.278048 | 0.003274 |
| C16C8.14   | C16C8.14  | chrII  | 0.278019 | 0.015116 |
| F46B6.12   | F46B6.12  | chrV   | 0.277863 | 0.003504 |
| F11C1.2    | mff-1     | chrX   | 0.277854 | 0.014523 |
| F44F1.4    | F44F1.4   | chrI   | 0.277845 | 0.018627 |
| ZK265.9    | ZK265.9   | chrI   | 0.277738 | 0.002515 |
| D1054.11   | D1054.11  | chrV   | 0.277731 | 0.001638 |
| T05D4.4    | osm-7     | chrIII | 0.277640 | 0.006476 |
| F17E9.4    | F17E9.4   | chrIV  | 0.277498 | 0.002775 |
| F10E7.5    | F10E7.5   | chrII  | 0.277413 | 0.001986 |
| C08B11.9   | C08B11.9  | chrII  | 0.277412 | 0.003179 |
| C01C10.2   | C01C10.2  | chrX   | 0.277223 | 0.026298 |
| F39H12.3   | F39H12.3  | chrX   | 0.277171 | 0.010717 |
| Y69A2AL.2  | Y69A2AL.2 | chrIV  | 0.276958 | 0.019119 |
| T23B12.7   | dnj-22    | chrV   | 0.276834 | 0.002272 |
| F59H5.3    | F59H5.3   | chrII  | 0.276810 | 0.044309 |
| D1086.8    | D1086.8   | chrV   | 0.276793 | 0.025823 |
| T26C5.1    | gst-13    | chrII  | 0.276648 | 0.004261 |
| C18B12.4   | C18B12.4  | chrX   | 0.276611 | 0.003530 |
| F28A12.4   | F28A12.4  | chrV   | 0.276599 | 0.001841 |
| C16E9.2    | C16E9.2   | chrX   | 0.276549 | 0.006476 |
| F22D6.4    | nduf-6    | chrI   | 0.276496 | 0.002639 |
| F48E3.2    | F48E3.2   | chrX   | 0.276204 | 0.003810 |
| C44C10.1   | col-180   | chrX   | 0.275944 | 0.015195 |
| Y59E9AL.7  | nbet-1    | chrIV  | 0.275909 | 0.003077 |
| Y71H2AR.1  | Y71H2AR.1 | chrIII | 0.275791 | 0.003146 |
| F02E9.5    | F02E9.5   | chrI   | 0.275715 | 0.004958 |
| C13C4.4    | C13C4.4   | chrV   | 0.275628 | 0.027729 |
| R08B4.3    | R08B4.3   | chrX   | 0.275384 | 0.018544 |
| C49H3.4    | C49H3.4   | chrIV  | 0.275237 | 0.009974 |
| W02A2.2    | far-6     | chrIV  | 0.274744 | 0.003105 |
| Y45F10D.4  | Y45F10D.4 | chrIV  | 0.274335 | 0.003065 |
| Y87G2A.10  | vps-28    | chrI   | 0.274324 | 0.002940 |
| T13C5.5    | bca-1     | chrX   | 0.274316 | 0.004234 |
| K04F1.9    | K04F1.9   | chrV   | 0.274166 | 0.026176 |
| F36F2.2    | F36F2.2   | chrI   | 0.274106 | 0.027996 |
| C01G8.1    | C01G8.1   | chrI   | 0.274055 | 0.001981 |
| ZK1128.8   | vps-29    | chrIII | 0.274043 | 0.002943 |
| Y14H12B.1  | Y14H12B.1 | chrII  | 0.273993 | 0.002552 |
| C13F10.5   | C13F10.5  | chrV   | 0.273867 | 0.004410 |
| K02D7.1    | K02D7.1   | chrIV  | 0.273780 | 0.003081 |
| F21C3.5    | pdf-6     | chrI   | 0.273766 | 0.002766 |
| H20J04.6   | H20J04.6  | chrII  | 0.273649 | 0.005802 |
| F20G2.2    | F20G2.2   | chrV   | 0.273638 | 0.004265 |
| F33H1.3    | F33H1.3   | chrII  | 0.273543 | 0.002393 |
| K01A11.1   | K01A11.1  | chrIII | 0.273407 | 0.036735 |
| C43E11.7   | ndx-7     | chrI   | 0.273314 | 0.004678 |
| C15C6.4    | C15C6.4   | chrI   | 0.273249 | 0.005256 |
| F11G11.2   | gst-7     | chrII  | 0.273238 | 0.002279 |
| EEED8.8    | ndx-6     | chrII  | 0.273139 | 0.008266 |
| B0432.3    | mrpl-41   | chrII  | 0.273086 | 0.004142 |

|           |           |        |          |          |
|-----------|-----------|--------|----------|----------|
| F39H11.1  | F39H11.1  | chrI   | 0.273077 | 0.003208 |
| T12G3.7   | T12G3.7   | chrIV  | 0.273003 | 0.002888 |
| F59F4.2   | F59F4.2   | chrX   | 0.272839 | 0.002448 |
| Y106G6A.5 | Y106G6A.5 | chrI   | 0.272766 | 0.003024 |
| F45G2.7   | F45G2.7   | chrIII | 0.272736 | 0.015601 |
| B0041.3   | B0041.3   | chrI   | 0.272573 | 0.024421 |
| C27F2.5   | vps-22    | chrIII | 0.272573 | 0.003293 |
| K10H10.2  | K10H10.2  | chrII  | 0.272491 | 0.003466 |
| R07E5.2   | prdx-3    | chrIII | 0.272447 | 0.002360 |
| F32H5.3   | F32H5.3   | chrV   | 0.272443 | 0.012134 |
| C07A9.2   | C07A9.2   | chrIII | 0.272443 | 0.003031 |
| Y43F8C.7  | Y43F8C.7  | chrV   | 0.272392 | 0.003294 |
| F25H5.6   | F25H5.6   | chrI   | 0.272368 | 0.005832 |
| R07B1.4   | gst-36    | chrX   | 0.272210 | 0.004196 |
| W06D11.3  | W06D11.3  | chrX   | 0.272182 | 0.006076 |
| C06H2.1   | atp-5     | chrV   | 0.271956 | 0.002105 |
| Y55F3AM.1 | Y55F3AM.1 | chrIV  | 0.271946 | 0.004240 |
| Y17G9B.5  | Y17G9B.5  | chrIV  | 0.271916 | 0.003444 |
| C08A9.10  | C08A9.10  | chrX   | 0.271663 | 0.007647 |
| K07E8.7   | K07E8.7   | chrII  | 0.271598 | 0.005698 |
| B0001.1   | lin-24    | chrIV  | 0.271527 | 0.003171 |
| T05E12.6  | T05E12.6  | chrV   | 0.271460 | 0.002574 |
| MTCE.16   | MTCE.16   | chrM   | 0.271341 | 0.004328 |
| C06A1.5   | rpb-6     | chrII  | 0.271169 | 0.002595 |
| C24F3.6   | col-124   | chrIV  | 0.271103 | 0.002069 |
| W01B11.5  | pqn-72    | chrI   | 0.271003 | 0.045999 |
| C17G1.6   | nas-37    | chrX   | 0.270880 | 0.007539 |
| B0432.2   | djr-1.1   | chrII  | 0.270788 | 0.003195 |
| T07C4.7   | mev-1     | chrIII | 0.270721 | 0.002720 |
| F07C4.7   | grsp-4    | chrV   | 0.270716 | 0.006116 |
| T20G5.11  | rde-4     | chrIII | 0.270602 | 0.002557 |
| F41H10.8  | elo-6     | chrIV  | 0.270453 | 0.002308 |
| Y39B6A.34 | Y39B6A.34 | chrV   | 0.270365 | 0.010052 |
| T01B7.3   | rab-21    | chrII  | 0.270161 | 0.004550 |
| Y71H2B.6  | mdt-19    | chrIII | 0.270143 | 0.003543 |
| C15C8.4   | C15C8.4   | chrV   | 0.269943 | 0.003279 |
| T23F2.5   | T23F2.5   | chrX   | 0.269692 | 0.002994 |
| T24H7.3   | T24H7.3   | chrII  | 0.269668 | 0.003842 |
| D1046.3   | D1046.3   | chrIV  | 0.269605 | 0.005540 |
| H24K24.5  | fmo-5     | chrV   | 0.269509 | 0.007293 |
| F41E6.2   | grd-5     | chrV   | 0.269348 | 0.002987 |
| C26B2.7   | C26B2.7   | chrIV  | 0.269296 | 0.006024 |
| F53F1.3   | F53F1.3   | chrV   | 0.269156 | 0.008076 |
| T04A8.5   | T04A8.5   | chrIII | 0.269076 | 0.011081 |
| F19C7.1   | F19C7.1   | chrIV  | 0.269052 | 0.002853 |
| T19H5.4   | T19H5.4   | chrII  | 0.268889 | 0.004141 |
| R07G3.2   | lips-17   | chrII  | 0.268878 | 0.041734 |
| F36D4.2   | F36D4.2   | chrV   | 0.268839 | 0.007045 |
| F47F2.1   | F47F2.1   | chrX   | 0.268823 | 0.036677 |
| C03H5.1   | clec-10   | chrII  | 0.268810 | 0.010257 |
| C45E5.1   | C45E5.1   | chrIV  | 0.268700 | 0.009057 |
| M02F4.3   | M02F4.3   | chrX   | 0.268482 | 0.021532 |
| C06E7.2   | C06E7.2   | chrIV  | 0.268261 | 0.027019 |
| Y43F8C.8  | Y43F8C.8  | chrV   | 0.268069 | 0.007050 |
| F58F12.1  | F58F12.1  | chrII  | 0.268055 | 0.002613 |
| Y63D3A.8  | Y63D3A.8  | chrI   | 0.267989 | 0.004739 |
| W02A11.2  | vps-25    | chrI   | 0.267960 | 0.005158 |
| Y73E7A.1  | Y73E7A.1  | chrI   | 0.267689 | 0.003795 |
| F53F8.3   | F53F8.3   | chrV   | 0.267625 | 0.003705 |
| Y95D11A.1 | Y95D11A.1 | chrI   | 0.267584 | 0.007422 |
| E04A4.8   | rpl-20    | chrIV  | 0.267556 | 0.002428 |
| Y53G8AR.7 | Y53G8AR.7 | chrIII | 0.267315 | 0.025494 |
| C49C8.5   | C49C8.5   | chrIV  | 0.267302 | 0.007215 |

|            |            |        |          |          |
|------------|------------|--------|----------|----------|
| Y51H1A.1   | Y51H1A.1   | chrII  | 0.267010 | 0.005772 |
| F21C10.10  | F21C10.10  | chrV   | 0.266861 | 0.009837 |
| ZC262.3    | ZC262.3    | chrIII | 0.266696 | 0.003577 |
| C30C11.1   | C30C11.1   | chrIII | 0.266565 | 0.005116 |
| F46F11.8   | F46F11.8   | chrI   | 0.266538 | 0.004218 |
| ZK1248.11  | ZK1248.11  | chrII  | 0.266453 | 0.004758 |
| Y37D8A.6   | Y37D8A.6   | chrIII | 0.266450 | 0.021690 |
| Y71H9A.3   | sto-4      | chrX   | 0.266330 | 0.008086 |
| F57B10.8   | F57B10.8   | chrI   | 0.266313 | 0.005579 |
| F31C3.9    | rrn-3.1    | chrI   | 0.266120 | 0.002512 |
| F38E1.7    | mom-2      | chrV   | 0.266082 | 0.002808 |
| F55A12.10  | F55A12.10  | chrI   | 0.265956 | 0.009776 |
| F56A3.2    | slx-1      | chrI   | 0.265916 | 0.003815 |
| Y110A7A.11 | use-1      | chrI   | 0.265578 | 0.006940 |
| F53A9.1    | F53A9.1    | chrX   | 0.265549 | 0.036387 |
| F49D11.9   | tag-296    | chrI   | 0.265378 | 0.004240 |
| F09E8.2    | F09E8.2    | chrIV  | 0.265326 | 0.004280 |
| C09H10.5   | C09H10.5   | chrII  | 0.265205 | 0.004972 |
| T24D1.3    | T24D1.3    | chrI   | 0.265080 | 0.003206 |
| Y37D8A.2   | Y37D8A.2   | chrIII | 0.265009 | 0.003238 |
| Y57G11C.13 | arl-8      | chrIV  | 0.264947 | 0.003137 |
| T01E8.6    | T01E8.6    | chrII  | 0.264699 | 0.004011 |
| Y17G7A.1   | hmg-12     | chrII  | 0.264584 | 0.002968 |
| D2013.10   | tag-175    | chrII  | 0.264575 | 0.010120 |
| K02B12.2   | K02B12.2   | chrI   | 0.264531 | 0.015115 |
| T14B4.2    | T14B4.2    | chrII  | 0.264392 | 0.008566 |
| C31E10.8   | tbc-19     | chrX   | 0.264380 | 0.031709 |
| D2096.7    | D2096.7    | chrIV  | 0.264344 | 0.004961 |
| W09G12.1   | dsl-2      | chrIV  | 0.264183 | 0.009828 |
| R04D3.3    | R04D3.3    | chrX   | 0.264169 | 0.003288 |
| F59B2.7    | rab-6.1    | chrIII | 0.264109 | 0.003983 |
| F54F2.7    | F54F2.7    | chrIII | 0.264089 | 0.033052 |
| R01B10.6   | R01B10.6   | chrV   | 0.264012 | 0.005297 |
| W05H12.1   | W05H12.1   | chrI   | 0.264001 | 0.041471 |
| Y62E10A.5  | agt-1      | chrIV  | 0.263921 | 0.008340 |
| 3R5.1      | pot-3      | chrIII | 0.263896 | 0.019533 |
| F31C3.10   | rrn-3.56   | chrI   | 0.263772 | 0.014837 |
| ZC412.3    | ZC412.3    | chrV   | 0.263770 | 0.015271 |
| C37H5.3    | C37H5.3    | chrV   | 0.263741 | 0.021295 |
| C30F12.4   | C30F12.4   | chrI   | 0.263575 | 0.003887 |
| C23H5.8    | C23H5.8    | chrIV  | 0.263565 | 0.003918 |
| B0303.11   | B0303.11   | chrIII | 0.263518 | 0.009386 |
| F35C11.5   | F35C11.5   | chrII  | 0.263297 | 0.003462 |
| C23G10.2   | C23G10.2   | chrIII | 0.263052 | 0.004141 |
| F35B12.7   | nlp-24     | chrV   | 0.262937 | 0.004497 |
| C27A12.10  | mbd-2      | chrI   | 0.262846 | 0.005146 |
| F38E1.9    | F38E1.9    | chrV   | 0.262654 | 0.004550 |
| Y47H9C.7   | Y47H9C.7   | chrI   | 0.262585 | 0.005106 |
| Y105C5B.20 | Y105C5B.20 | chrIV  | 0.262460 | 0.033614 |
| Y105C5A.8  | Y105C5A.8  | chrIV  | 0.262328 | 0.010401 |
| D1007.6    | rps-10     | chrI   | 0.262274 | 0.002998 |
| ZK973.9    | ZK973.9    | chrI   | 0.262255 | 0.004495 |
| Y57G11A.4  | Y57G11A.4  | chrIV  | 0.262047 | 0.022490 |
| T12A7.2    | T12A7.2    | chrIV  | 0.262046 | 0.048910 |
| H41C03.3   | H41C03.3   | chrII  | 0.261995 | 0.027611 |
| R01B10.4   | R01B10.4   | chrV   | 0.261935 | 0.028173 |
| F25H9.6    | F25H9.6    | chrV   | 0.261826 | 0.007734 |
| B0464.7    | baf-1      | chrIII | 0.261736 | 0.003902 |
| Y54E10A.17 | Y54E10A.17 | chrI   | 0.261697 | 0.007037 |
| Y53C10A.6  | Y53C10A.6  | chrI   | 0.261652 | 0.004797 |
| C48E7.3    | lpd-2      | chrI   | 0.261639 | 0.004946 |
| F37C12.2   | epg-4      | chrIII | 0.261638 | 0.004333 |
| W05B5.1    | W05B5.1    | chrI   | 0.261524 | 0.008503 |

|            |            |        |          |          |
|------------|------------|--------|----------|----------|
| W09B6.3    | eri-3      | chrII  | 0.261253 | 0.005637 |
| C56E10.4   | nhr-137    | chrX   | 0.261250 | 0.041002 |
| Y119D3B.15 | dss-1      | chrIII | 0.261214 | 0.003902 |
| MTCE.21    | ctb-1      | chrM   | 0.261089 | 0.003137 |
| R07B7.3    | pqn-53     | chrV   | 0.260912 | 0.003678 |
| F14B6.1    | sdz-14     | chrI   | 0.260903 | 0.046667 |
| F44E2.10   | F44E2.10   | chrIII | 0.260875 | 0.005892 |
| W10G11.16  | lgc-45     | chrII  | 0.260832 | 0.038393 |
| Y41C4A.16  | col-95     | chrIII | 0.260824 | 0.003911 |
| Y67H2A.5   | Y67H2A.5   | chrIV  | 0.260818 | 0.003393 |
| Y54F10AM.5 | Y54F10AM.5 | chrIII | 0.260774 | 0.004156 |
| C31H2.4    | C31H2.4    | chrX   | 0.260680 | 0.036626 |
| W06D12.3   | fat-5      | chrV   | 0.260674 | 0.004703 |
| F55A12.4   | dhs-2      | chrI   | 0.260648 | 0.010293 |
| Y54E10BL.5 | nduf-5     | chrI   | 0.260580 | 0.004240 |
| C05D9.7    | C05D9.7    | chrX   | 0.260510 | 0.010746 |
| Y37E11AL.3 | Y37E11AL.3 | chrIV  | 0.260489 | 0.004069 |
| R06C1.4    | R06C1.4    | chrI   | 0.260377 | 0.003913 |
| F26E4.9    | cco-1      | chrI   | 0.260290 | 0.003490 |
| T08B2.8    | T08B2.8    | chrI   | 0.260193 | 0.006112 |
| F28C6.7    | rpl-26     | chrII  | 0.260041 | 0.003292 |
| F18F11.1   | F18F11.1   | chrIV  | 0.259987 | 0.019240 |
| C16H3.2    | lec-9      | chrX   | 0.259973 | 0.005316 |
| Y47D9A.2   | scpl-3     | chrI   | 0.259914 | 0.008502 |
| F46F11.7   | F46F11.7   | chrI   | 0.259495 | 0.031557 |
| W03F9.5    | ttb-1      | chrV   | 0.259395 | 0.005062 |
| F36H9.3    | dhs-13     | chrV   | 0.259268 | 0.004413 |
| C52E4.6    | cyl-1      | chrV   | 0.259245 | 0.004116 |
| F49E8.4    | cdd-2      | chrIV  | 0.259236 | 0.006146 |
| F02E9.7    | F02E9.7    | chrI   | 0.259215 | 0.005717 |
| ZK856.8    | ZK856.8    | chrV   | 0.259157 | 0.004992 |
| F53A3.3    | rps-22     | chrIII | 0.259075 | 0.003425 |
| C30B5.2    | C30B5.2    | chrII  | 0.259064 | 0.004406 |
| W02D3.5    | lbp-6      | chrI   | 0.259030 | 0.003711 |
| Y52B11C.1  | Y52B11C.1  | chrI   | 0.258952 | 0.009703 |
| ZC395.2    | clk-1      | chrIII | 0.258921 | 0.008675 |
| Y71F9B.16  | dnj-30     | chrI   | 0.258886 | 0.005554 |
| Y46E12BL.3 | spsb-2     | chrII  | 0.258821 | 0.004610 |
| Y18D10A.8  | Y18D10A.8  | chrI   | 0.258607 | 0.012833 |
| C33H5.12   | rsp-6      | chrIV  | 0.258584 | 0.003965 |
| F13G11.1   | dmd-6      | chrIV  | 0.258517 | 0.005675 |
| F57C9.1    | F57C9.1    | chrI   | 0.258466 | 0.006088 |
| K08H2.6    | hpl-1      | chrX   | 0.258354 | 0.033052 |
| Y45F10C.4  | Y45F10C.4  | chrIV  | 0.258322 | 0.007761 |
| Y48B6A.13  | Y48B6A.13  | chrII  | 0.258190 | 0.008010 |
| C35D10.10  | C35D10.10  | chrIII | 0.257909 | 0.005064 |
| C48B4.11   | C48B4.11   | chrIII | 0.257904 | 0.005417 |
| R08E5.1    | R08E5.1    | chrV   | 0.257878 | 0.043003 |
| Y17D7C.3   | Y17D7C.3   | chrV   | 0.257867 | 0.019817 |
| F46A9.4    | skr-2      | chrI   | 0.257765 | 0.004148 |
| F56B3.8    | F56B3.8    | chrIV  | 0.257755 | 0.007467 |
| F44A2.5    | F44A2.5    | chrV   | 0.257680 | 0.034189 |
| T28A8.5    | T28A8.5    | chrIII | 0.257485 | 0.013843 |
| F41E6.15   | F41E6.15   | chrV   | 0.257268 | 0.024356 |
| C44E4.6    | acbp-1     | chrI   | 0.257242 | 0.004333 |
| F47G9.4    | F47G9.4    | chrV   | 0.257202 | 0.038138 |
| B0495.8    | B0495.8    | chrII  | 0.257169 | 0.005029 |
| C01G6.4    | C01G6.4    | chrII  | 0.257130 | 0.006676 |
| H12C20.6   | nhr-101    | chrV   | 0.257075 | 0.019981 |
| F45H11.2   | ned-8      | chrI   | 0.257022 | 0.004958 |
| Y67A10A.4  | fbxa-83    | chrIV  | 0.257007 | 0.036528 |
| F35G2.1    | F35G2.1    | chrIV  | 0.256790 | 0.004165 |
| ZK637.6    | ZK637.6    | chrIII | 0.256756 | 0.009734 |

|            |            |        |          |          |
|------------|------------|--------|----------|----------|
| F15B9.1    | far-3      | chrV   | 0.256748 | 0.006163 |
| T19B10.6   | T19B10.6   | chrV   | 0.256665 | 0.004493 |
| F54D5.2    | F54D5.2    | chrII  | 0.256613 | 0.006452 |
| Y51F10.4   | Y51F10.4   | chrI   | 0.256584 | 0.005970 |
| C47E8.4    | C47E8.4    | chrV   | 0.256476 | 0.005477 |
| M88.2      | M88.2      | chrIII | 0.256444 | 0.006959 |
| ZK1236.6   | pqn-96     | chrIII | 0.256184 | 0.007573 |
| ZK1127.3   | ZK1127.3   | chrII  | 0.256165 | 0.006431 |
| F40F9.9    | aqp-4      | chrV   | 0.255588 | 0.032855 |
| F08F3.4    | F08F3.4    | chrV   | 0.255561 | 0.005973 |
| Y61A9LA.11 | Y61A9LA.11 | chrV   | 0.255544 | 0.010146 |
| T07G12.8   | T07G12.8   | chrIV  | 0.255520 | 0.048691 |
| Y97E10AR.3 | Y97E10AR.3 | chrV   | 0.255440 | 0.006936 |
| R107.5     | R107.5     | chrIII | 0.255428 | 0.004871 |
| Y39A1A.11  | dhs-11     | chrIII | 0.255361 | 0.011807 |
| Y105E8B.1  | lev-11     | chrI   | 0.255226 | 0.003986 |
| W01B11.6   | W01B11.6   | chrI   | 0.255221 | 0.013473 |
| F32D8.9    | spp-16     | chrV   | 0.255149 | 0.038856 |
| Y41D4B.13  | ced-2      | chrIV  | 0.255112 | 0.005540 |
| Y51H4A.15  | Y51H4A.15  | chrIV  | 0.255093 | 0.007483 |
| T04H1.5    | T04H1.5    | chrV   | 0.255091 | 0.007633 |
| Y66H1A.3   | tag-313    | chrIV  | 0.254969 | 0.015662 |
| Y60A3A.18  | skr-4      | chrV   | 0.254961 | 0.029071 |
| AC3.2      | ugt-49     | chrV   | 0.254945 | 0.023378 |
| T24E12.11  | T24E12.11  | chrII  | 0.254920 | 0.036149 |
| ZK154.4    | ZK154.4    | chrX   | 0.254825 | 0.018549 |
| D1054.1    | D1054.1    | chrV   | 0.254760 | 0.018139 |
| K02F3.4    | zip-2      | chrIII | 0.254741 | 0.004998 |
| M163.1     | M163.1     | chrX   | 0.254548 | 0.010395 |
| Y39A1A.8   | Y39A1A.8   | chrIII | 0.254403 | 0.036245 |
| cTel55X.1  | cTel55X.1  | chrX   | 0.254322 | 0.008313 |
| Y105C5B.13 | skr-10     | chrIV  | 0.254250 | 0.014842 |
| Y54G11A.7  | Y54G11A.7  | chrII  | 0.254237 | 0.013097 |
| F56A8.9    | F56A8.9    | chrIII | 0.254005 | 0.043566 |
| T04A8.9    | dnj-18     | chrIII | 0.253954 | 0.010641 |
| R144.3     | R144.3     | chrIII | 0.253852 | 0.009847 |
| C34F6.3    | col-179    | chrX   | 0.253750 | 0.004513 |
| Y39B6A.21  | Y39B6A.21  | chrV   | 0.253739 | 0.009605 |
| B0464.8    | tag-342    | chrIII | 0.253636 | 0.006313 |
| F55H12.6   | ztf-26     | chrI   | 0.253609 | 0.048982 |
| W08F4.3    | W08F4.3    | chrII  | 0.253591 | 0.004758 |
| ZK228.4    | ZK228.4    | chrV   | 0.253325 | 0.014568 |
| F58G6.7    | F58G6.7    | chrIV  | 0.253193 | 0.027884 |
| F37C12.9   | rps-14     | chrIII | 0.253172 | 0.004261 |
| F17A9.6    | ceh-49     | chrV   | 0.253123 | 0.009414 |
| R09B5.8    | cnc-3      | chrV   | 0.253035 | 0.030751 |
| F52B11.6   | ins-34     | chrIV  | 0.252983 | 0.048753 |
| Y54E5A.5   | Y54E5A.5   | chrI   | 0.252946 | 0.006088 |
| F21C3.3    | hint-1     | chrI   | 0.252879 | 0.006463 |
| F35H10.6   | F35H10.6   | chrIV  | 0.252551 | 0.012529 |
| F25H2.7    | F25H2.7    | chrI   | 0.252528 | 0.012709 |
| F10E9.3    | F10E9.3    | chrIII | 0.252523 | 0.006183 |
| Y40G12A.2  | ubh-2      | chrV   | 0.252466 | 0.011448 |
| F14B6.3    | F14B6.3    | chrI   | 0.252463 | 0.023516 |
| D2023.4    | D2023.4    | chrV   | 0.252457 | 0.011689 |
| T19B10.1   | cyp-29A2   | chrV   | 0.252409 | 0.008063 |
| Y40B10A.1  | lbp-9      | chrV   | 0.252366 | 0.004541 |
| F25G6.8    | F25G6.8    | chrV   | 0.252218 | 0.005975 |
| C46A5.6    | C46A5.6    | chrIV  | 0.252137 | 0.008112 |
| C46F2.1    | C46F2.1    | chrX   | 0.252064 | 0.047869 |
| T10B5.3    | T10B5.3    | chrV   | 0.252049 | 0.005766 |
| F42G9.2    | cyn-6      | chrIII | 0.251946 | 0.007863 |
| F10G8.7    | ercc-1     | chrI   | 0.251822 | 0.007170 |

|            |           |        |          |          |
|------------|-----------|--------|----------|----------|
| Y73B6BL.25 | acp-7     | chrIV  | 0.251693 | 0.027698 |
| C47D12.5   | C47D12.5  | chrII  | 0.251656 | 0.024317 |
| H21P03.1   | mbf-1     | chrIV  | 0.251556 | 0.005521 |
| W08E3.1    | snr-2     | chrI   | 0.251456 | 0.004951 |
| Y111B2A.18 | rsp-3     | chrIII | 0.251371 | 0.004784 |
| W02H5.8    | W02H5.8   | chrV   | 0.251298 | 0.010223 |
| C33C12.10  | C33C12.10 | chrII  | 0.251175 | 0.017559 |
| C44E4.8    | C44E4.8   | chrI   | 0.250625 | 0.019970 |
| D2096.2    | praf-3    | chrIV  | 0.250590 | 0.005781 |
| K07B1.3    | ucp-4     | chrV   | 0.250532 | 0.011399 |
| ZK673.2    | ZK673.2   | chrII  | 0.250480 | 0.006068 |
| C13F10.2   | C13F10.2  | chrV   | 0.250394 | 0.020766 |
| M01E5.4    | M01E5.4   | chrI   | 0.250341 | 0.006731 |
| R12B2.1    | sma-4     | chrIII | 0.250042 | 0.027885 |
| W06B4.2    | W06B4.2   | chrII  | 0.250034 | 0.013340 |
| B0272.2    | memb-1    | chrX   | 0.250008 | 0.026996 |
| C18E3.8    | hop-1     | chrI   | 0.249958 | 0.008870 |
| Y53F4B.31  | gst-28    | chrII  | 0.249950 | 0.030763 |
| C01F6.8    | icl-1     | chrIV  | 0.249785 | 0.006705 |
| F45H11.5   | F45H11.5  | chrI   | 0.249781 | 0.014499 |
| C02F5.12   | C02F5.12  | chrIII | 0.249544 | 0.020674 |
| T25E12.5   | gyg-2     | chrV   | 0.249449 | 0.005364 |
| C18A3.2    | C18A3.2   | chrII  | 0.249402 | 0.009077 |
| M79.2      | M79.2     | chrX   | 0.249375 | 0.020678 |
| C38D4.6    | pal-1     | chrIII | 0.249307 | 0.005631 |
| F43G9.4    | F43G9.4   | chrI   | 0.249200 | 0.008058 |
| C11G6.3    | C11G6.3   | chrX   | 0.249122 | 0.010402 |
| Y49E10.14  | pie-1     | chrIII | 0.249102 | 0.006267 |
| ZK185.3    | ZK185.3   | chrIV  | 0.249067 | 0.024648 |
| Y39A1A.3   | Y39A1A.3  | chrIII | 0.249046 | 0.009020 |
| K08D12.1   | pbs-1     | chrIV  | 0.248689 | 0.005540 |
| T06D8.6    | cchl-1    | chrII  | 0.248190 | 0.005875 |
| Y67H2A.4   | Y67H2A.4  | chrIV  | 0.248103 | 0.007050 |
| T20D3.6    | T20D3.6   | chrIV  | 0.248088 | 0.011120 |
| T24A11.3   | toh-1     | chrIII | 0.248027 | 0.020340 |
| C37C3.9    | C37C3.9   | chrV   | 0.248024 | 0.006079 |
| T05E11.4   | spo-11    | chrIV  | 0.247786 | 0.009121 |
| D1007.12   | rpl-24.1  | chrI   | 0.247696 | 0.005284 |
| R05D7.4    | R05D7.4   | chrI   | 0.247564 | 0.011367 |
| F35C8.6    | pfn-2     | chrX   | 0.247382 | 0.008177 |
| M05B5.4    | M05B5.4   | chrI   | 0.247077 | 0.012166 |
| T09B4.10   | chn-1     | chrI   | 0.247016 | 0.007317 |
| R10E11.4   | sqv-3     | chrIII | 0.246973 | 0.009776 |
| Y18H1A.4   | Y18H1A.4  | chrI   | 0.246938 | 0.013473 |
| Y62E10A.2  | Y62E10A.2 | chrIV  | 0.246907 | 0.006795 |
| F32D8.14   | F32D8.14  | chrV   | 0.246888 | 0.007881 |
| M142.1     | unc-119   | chrIII | 0.246864 | 0.016642 |
| T03D8.2    | T03D8.2   | chrV   | 0.246640 | 0.010776 |
| C53A5.1    | ril-1     | chrV   | 0.246632 | 0.005867 |
| F35A5.8    | erp-1     | chrX   | 0.246600 | 0.016333 |
| ZK105.1    | ZK105.1   | chrV   | 0.246412 | 0.007915 |
| C07A12.3   | nhr-35    | chrX   | 0.246411 | 0.027917 |
| H02I12.5   | H02I12.5  | chrIV  | 0.246163 | 0.007523 |
| C15H9.9    | C15H9.9   | chrX   | 0.246129 | 0.007307 |
| H06I04.6   | H06I04.6  | chrIII | 0.246107 | 0.031370 |
| F37B4.10   | F37B4.10  | chrV   | 0.246069 | 0.019550 |
| R08C7.2    | R08C7.2   | chrIV  | 0.246064 | 0.007129 |
| T02G5.13   | mmaa-1    | chrII  | 0.245939 | 0.006801 |
| C15H11.4   | dhs-22    | chrV   | 0.245806 | 0.006679 |
| ZK637.14   | ZK637.14  | chrIII | 0.245694 | 0.032772 |
| T04A8.8    | T04A8.8   | chrIII | 0.245631 | 0.006464 |
| T03G11.6   | T03G11.6  | chrX   | 0.245617 | 0.011299 |
| T24H7.5    | tat-4     | chrII  | 0.245573 | 0.007251 |



|            |            |        |          |          |
|------------|------------|--------|----------|----------|
| C06A6.3    | mvb-12     | chrIV  | 0.245250 | 0.010313 |
| T04G9.5    | trap-2     | chrX   | 0.245202 | 0.006224 |
| Y57G11C.36 | Y57G11C.36 | chrIV  | 0.245177 | 0.011695 |
| W02A2.1    | fat-2      | chrIV  | 0.245142 | 0.006082 |
| F18G5.2    | pes-8      | chrX   | 0.245065 | 0.048813 |
| ZK1127.12  | ZK1127.12  | chrII  | 0.245061 | 0.019127 |
| C33A12.1   | C33A12.1   | chrIV  | 0.244947 | 0.007574 |
| T02H6.11   | T02H6.11   | chrII  | 0.244846 | 0.006650 |
| Y53H1B.2   | Y53H1B.2   | chrI   | 0.244218 | 0.011330 |
| F31C3.1    | cyn-5      | chrI   | 0.244190 | 0.006354 |
| M01B12.3   | arx-7      | chrI   | 0.244149 | 0.011824 |
| D1081.9    | D1081.9    | chrI   | 0.244065 | 0.011324 |
| H40L08.2   | H40L08.2   | chrX   | 0.244014 | 0.015337 |
| Y5F2A.1    | ttr-16     | chrIV  | 0.243957 | 0.006807 |
| Y39B6A.36  | Y39B6A.36  | chrV   | 0.243843 | 0.008311 |
| T22B11.4   | T22B11.4   | chrIV  | 0.243734 | 0.012757 |
| F25B4.7    | F25B4.7    | chrV   | 0.243454 | 0.010602 |
| F29C6.1    | F29C6.1    | chrI   | 0.243372 | 0.015936 |
| Y37D8A.23  | unc-25     | chrIII | 0.243240 | 0.037082 |
| C08C3.4    | C08C3.4    | chrIII | 0.243105 | 0.007554 |
| F43G6.3    | F43G6.3    | chrII  | 0.243103 | 0.011448 |
| M163.3     | his-24     | chrX   | 0.242867 | 0.006999 |
| R04B3.2    | R04B3.2    | chrX   | 0.242844 | 0.047696 |
| C42D4.1    | C42D4.1    | chrIV  | 0.242753 | 0.007403 |
| Y11D7A.7   | Y11D7A.7   | chrIV  | 0.242738 | 0.014587 |
| C34B2.8    | C34B2.8    | chrI   | 0.242677 | 0.007288 |
| F41H10.7   | elo-5      | chrIV  | 0.242617 | 0.007622 |
| M01F1.8    | M01F1.8    | chrIII | 0.242600 | 0.011901 |
| Y49F6B.4   | smu-2      | chrII  | 0.242585 | 0.008031 |
| Y49E10.4   | Y49E10.4   | chrIII | 0.242568 | 0.008960 |
| T01D1.3    | T01D1.3    | chrII  | 0.242389 | 0.042253 |
| Y53G8AR.3  | ral-1      | chrIII | 0.242263 | 0.010746 |
| C33A12.19  | C33A12.19  | chrIV  | 0.242261 | 0.018709 |
| T25B2.2    | T25B2.2    | chrX   | 0.242181 | 0.040658 |
| R02F11.4   | R02F11.4   | chrV   | 0.242176 | 0.010301 |
| H29C22.1   | H29C22.1   | chrX   | 0.242115 | 0.017880 |
| F13D12.5   | F13D12.5   | chrII  | 0.241873 | 0.009949 |
| ZC53.7     | rgs-9      | chrX   | 0.241657 | 0.019276 |
| M04F3.4    | M04F3.4    | chrI   | 0.241527 | 0.017146 |
| F55F8.6    | mff-2      | chrI   | 0.241387 | 0.011469 |
| F43D2.2    | F43D2.2    | chrV   | 0.241256 | 0.011189 |
| F59A3.9    | pup-3      | chrI   | 0.241216 | 0.029008 |
| W01A8.5    | W01A8.5    | chrI   | 0.241205 | 0.009029 |
| K02G10.3   | tmem-135   | chrX   | 0.241181 | 0.029260 |
| Y62H9A.3   | Y62H9A.3   | chrX   | 0.240918 | 0.008401 |
| Y54E10BR.8 | ztf-23     | chrI   | 0.240609 | 0.011612 |
| Y26E6A.3   | Y26E6A.3   | chrX   | 0.240595 | 0.035905 |
| LLC1.2     | LLC1.2     | chrIV  | 0.240555 | 0.008903 |
| F41E6.12   | F41E6.12   | chrV   | 0.240478 | 0.017310 |
| C16C2.4    | C16C2.4    | chrI   | 0.240312 | 0.008446 |
| T03F1.7    | T03F1.7    | chrI   | 0.240219 | 0.018438 |
| F08B4.7    | F08B4.7    | chrIV  | 0.240211 | 0.009134 |
| F17H10.1   | F17H10.1   | chrX   | 0.239999 | 0.010482 |
| D2092.4    | D2092.4    | chrI   | 0.239968 | 0.014047 |
| F54A5.3    | shc-1      | chrI   | 0.239925 | 0.032927 |
| T22F3.2    | T22F3.2    | chrV   | 0.239786 | 0.009554 |
| C29F7.3    | C29F7.3    | chrX   | 0.239325 | 0.009852 |
| B0457.2    | B0457.2    | chrII  | 0.239311 | 0.025945 |
| F29G9.6    | dhs-17     | chrV   | 0.238998 | 0.030697 |
| F55C10.1   | cnb-1      | chrV   | 0.238976 | 0.015604 |
| C16C8.4    | C16C8.4    | chrII  | 0.238968 | 0.018463 |
| W05G11.6   | W05G11.6   | chrIII | 0.238964 | 0.008333 |
| F20H11.5   | ddo-3      | chrIII | 0.238834 | 0.009412 |

|            |            |        |          |          |
|------------|------------|--------|----------|----------|
| F48A11.4   | F48A11.4   | chrII  | 0.238745 | 0.011500 |
| F55G1.6    | F55G1.6    | chrIV  | 0.238684 | 0.010503 |
| C27D6.4    | C27D6.4    | chrII  | 0.238515 | 0.009070 |
| C50B8.2    | bir-2      | chrV   | 0.238383 | 0.012029 |
| H25P19.1   | H25P19.1   | chrV   | 0.238286 | 0.016332 |
| ZC434.9    | ZC434.9    | chrI   | 0.238212 | 0.018544 |
| T12G3.5    | T12G3.5    | chrIV  | 0.238148 | 0.010764 |
| Y57A10A.30 | ife-5      | chrII  | 0.238109 | 0.026803 |
| Y39G8B.2   | Y39G8B.2   | chrII  | 0.238084 | 0.032986 |
| E01G4.5    | E01G4.5    | chrII  | 0.238084 | 0.049173 |
| T19B10.4   | pqn-70     | chrV   | 0.238061 | 0.008471 |
| W09G3.1    | W09G3.1    | chrI   | 0.238029 | 0.021953 |
| C01G6.3    | C01G6.3    | chrII  | 0.237981 | 0.008485 |
| ZK84.1     | ZK84.1     | chrII  | 0.237879 | 0.039281 |
| Y69A2AR.7  | Y69A2AR.7  | chrIV  | 0.237620 | 0.016896 |
| Y39E4A.2   | ttn-1      | chrIII | 0.237571 | 0.016992 |
| C17H12.13  | C17H12.13  | chrIV  | 0.237506 | 0.009251 |
| Y38A8.1    | ndx-3      | chrII  | 0.237438 | 0.032950 |
| R07B7.10   | R07B7.10   | chrV   | 0.237357 | 0.037784 |
| Y97E10C.1  | Y97E10C.1  | chrV   | 0.237141 | 0.017285 |
| F02H6.3    | F02H6.3    | chrIV  | 0.237102 | 0.013749 |
| Y54E10A.4  | fog-1      | chrI   | 0.236987 | 0.017579 |
| F54F3.4    | F54F3.4    | chrV   | 0.236970 | 0.026476 |
| ZK822.2    | ZK822.2    | chrIV  | 0.236953 | 0.018346 |
| Y48G8AL.8  | rpl-17     | chrI   | 0.236827 | 0.007922 |
| C13G5.2    | C13G5.2    | chrIII | 0.236749 | 0.010764 |
| K08E7.2    | hsb-1      | chrIV  | 0.236629 | 0.010444 |
| F23F1.5    | F23F1.5    | chrII  | 0.236501 | 0.010952 |
| F19B10.2   | F19B10.2   | chrII  | 0.236411 | 0.018063 |
| R02D5.8    | R02D5.8    | chrV   | 0.236199 | 0.027639 |
| C17G1.7    | C17G1.7    | chrX   | 0.236163 | 0.016829 |
| ZK418.5    | ZK418.5    | chrIII | 0.236161 | 0.009713 |
| T01C3.3    | T01C3.3    | chrV   | 0.236143 | 0.009004 |
| T23G7.2    | T23G7.2    | chrII  | 0.236137 | 0.015337 |
| Y97E10AL.3 | Y97E10AL.3 | chrV   | 0.236008 | 0.013259 |
| C08B6.8    | C08B6.8    | chrV   | 0.235891 | 0.012320 |
| C49C3.7    | C49C3.7    | chrIV  | 0.235874 | 0.013070 |
| W06B11.3   | dct-11     | chrX   | 0.235859 | 0.032473 |
| C17F4.5    | fbxc-50    | chrII  | 0.235749 | 0.012897 |
| C06G3.2    | klp-18     | chrIV  | 0.235676 | 0.010290 |
| C54G4.6    | dod-18     | chrI   | 0.235632 | 0.035600 |
| C11D2.4    | C11D2.4    | chrIV  | 0.235597 | 0.011310 |
| C25G4.3    | C25G4.3    | chrIV  | 0.235566 | 0.022440 |
| C34B7.3    | cyp-36A1   | chrI   | 0.235565 | 0.032780 |
| T14F9.3    | hex-1      | chrX   | 0.235536 | 0.015746 |
| Y54G2A.18  | Y54G2A.18  | chrIV  | 0.235529 | 0.009715 |
| K11D9.3    | K11D9.3    | chrIII | 0.235495 | 0.030751 |
| T03F6.3    | T03F6.3    | chrIII | 0.235436 | 0.010137 |
| H43I07.3   | H43I07.3   | chrV   | 0.235333 | 0.014388 |
| K07B1.7    | K07B1.7    | chrV   | 0.235309 | 0.015012 |
| F40A3.1    | F40A3.1    | chrV   | 0.234925 | 0.040317 |
| K09H9.7    | K09H9.7    | chrI   | 0.234796 | 0.020641 |
| Y73C8B.3   | Y73C8B.3   | chrV   | 0.234747 | 0.032520 |
| F15D3.6    | F15D3.6    | chrI   | 0.234676 | 0.011813 |
| C41G7.9    | C41G7.9    | chrI   | 0.234594 | 0.010796 |
| F12A10.8   | F12A10.8   | chrII  | 0.234523 | 0.018719 |
| R04D3.4    | R04D3.4    | chrX   | 0.234481 | 0.020756 |
| Y48E1B.12  | csc-1      | chrII  | 0.234428 | 0.011330 |
| T01C8.2    | T01C8.2    | chrX   | 0.234319 | 0.027873 |
| F56C9.6    | F56C9.6    | chrIII | 0.234306 | 0.009786 |
| F27E5.1    | F27E5.1    | chrII  | 0.234230 | 0.020869 |
| Y47G6A.18  | Y47G6A.18  | chrI   | 0.234194 | 0.012933 |
| K11D12.7   | K11D12.7   | chrV   | 0.234172 | 0.019672 |

|            |            |        |          |          |
|------------|------------|--------|----------|----------|
| C50F4.13   | his-35     | chrV   | 0.234147 | 0.015550 |
| F40A3.2    | F40A3.2    | chrV   | 0.234138 | 0.021526 |
| T07C5.1    | ugt-50     | chrX   | 0.234058 | 0.020207 |
| E02H9.7    | E02H9.7    | chrIII | 0.233946 | 0.028986 |
| F54H12.6   | eef-1B.1   | chrIII | 0.233749 | 0.008999 |
| C03C10.4   | C03C10.4   | chrIII | 0.233658 | 0.011884 |
| F41H10.10  | htp-1      | chrIV  | 0.233632 | 0.011576 |
| Y42H9B.3   | Y42H9B.3   | chrIV  | 0.233491 | 0.011212 |
| F37F2.2    | F37F2.2    | chrI   | 0.233388 | 0.020342 |
| Y62E10A.8  | mau-8      | chrIV  | 0.233257 | 0.016415 |
| ZK673.3    | ZK673.3    | chrII  | 0.233160 | 0.019322 |
| F26A3.1    | F26A3.1    | chrI   | 0.233005 | 0.023408 |
| F23H12.1   | snb-2      | chrV   | 0.232866 | 0.044241 |
| CD4.8      | CD4.8      | chrV   | 0.232824 | 0.047742 |
| C33F10.5   | rig-6      | chrII  | 0.232710 | 0.014648 |
| C18A3.3    | C18A3.3    | chrII  | 0.232655 | 0.010796 |
| F42D1.2    | tatn-1     | chrX   | 0.232631 | 0.010994 |
| K02B2.3    | K02B2.3    | chrIV  | 0.232594 | 0.011561 |
| C25H3.3    | C25H3.3    | chrII  | 0.232470 | 0.025582 |
| B0416.4    | B0416.4    | chrX   | 0.232394 | 0.039593 |
| C16A11.6   | fbxc-44    | chrII  | 0.232338 | 0.015311 |
| B0334.1    | ttr-18     | chrII  | 0.232242 | 0.015917 |
| F32B6.3    | F32B6.3    | chrIV  | 0.232202 | 0.016705 |
| K11H12.2   | rpl-15     | chrIV  | 0.232169 | 0.009351 |
| ZC308.4    | ZC308.4    | chrI   | 0.232088 | 0.011189 |
| K05C4.7    | K05C4.7    | chrI   | 0.231833 | 0.011557 |
| Y108G3AL.2 | Y108G3AL.2 | chrV   | 0.231759 | 0.013671 |
| W03F11.1   | W03F11.1   | chrI   | 0.231756 | 0.011436 |
| E02H9.3    | E02H9.3    | chrIII | 0.231595 | 0.043678 |
| C28H8.4    | C28H8.4    | chrIII | 0.231593 | 0.011135 |
| Y54E10BR.5 | Y54E10BR.5 | chrI   | 0.231583 | 0.011215 |
| F42A6.6    | F42A6.6    | chrIV  | 0.231404 | 0.045453 |
| Y47G6A.22  | Y47G6A.22  | chrI   | 0.231359 | 0.017206 |
| T08B2.10   | rps-17     | chrI   | 0.231338 | 0.009727 |
| F57B10.12  | mei-2      | chrI   | 0.231289 | 0.011074 |
| C53D5.4    | ztf-3      | chrI   | 0.231240 | 0.027809 |
| F11H8.3    | col-8      | chrIII | 0.231210 | 0.009761 |
| F45E4.9    | hmg-5      | chrIV  | 0.231171 | 0.012724 |
| Y55F3AM.4  | atg-3      | chrIV  | 0.231001 | 0.015237 |
| C36B1.11   | C36B1.11   | chrI   | 0.230979 | 0.011162 |
| W02D7.6    | W02D7.6    | chrV   | 0.230919 | 0.017491 |
| B0491.7    | B0491.7    | chrII  | 0.230853 | 0.025055 |
| T25G12.7   | dhs-30     | chrX   | 0.230818 | 0.021777 |
| F38B6.4    | F38B6.4    | chrX   | 0.230806 | 0.020156 |
| T16H12.3   | T16H12.3   | chrIII | 0.230722 | 0.021337 |
| F33H2.3    | F33H2.3    | chrI   | 0.230650 | 0.012134 |
| F09F7.2    | mhc-3      | chrIII | 0.230481 | 0.010313 |
| Y39A1A.6   | Y39A1A.6   | chrIII | 0.230317 | 0.020237 |
| F20D6.4    | srp-7      | chrV   | 0.230306 | 0.011372 |
| Y40H7A.10  | Y40H7A.10  | chrIV  | 0.230207 | 0.016933 |
| Y66A7A.8   | tbx-33     | chrIII | 0.230085 | 0.042944 |
| D1054.3    | D1054.3    | chrV   | 0.229845 | 0.012313 |
| C24A11.9   | coq-1      | chrI   | 0.229735 | 0.017581 |
| C32E12.4   | C32E12.4   | chrI   | 0.229657 | 0.035499 |
| T23G7.3    | T23G7.3    | chrII  | 0.229580 | 0.012061 |
| Y94H6A.8   | Y94H6A.8   | chrIV  | 0.229565 | 0.013215 |
| EEED8.14   | EEED8.14   | chrII  | 0.229430 | 0.018997 |
| D1086.6    | D1086.6    | chrV   | 0.229428 | 0.013926 |
| F18A11.1   | puf-6      | chrII  | 0.229391 | 0.041501 |
| Y37E3.1    | Y37E3.1    | chrI   | 0.229375 | 0.017092 |
| Y51H7C.7   | Y51H7C.7   | chrII  | 0.229328 | 0.019342 |
| T05G5.7    | rmd-1      | chrIII | 0.229201 | 0.010746 |
| F42A9.6    | F42A9.6    | chrIV  | 0.229019 | 0.016149 |

|             |            |        |          |          |
|-------------|------------|--------|----------|----------|
| T11G6.4     | T11G6.4    | chrIV  | 0.228832 | 0.038335 |
| K10D3.3     | taf-11.2   | chrI   | 0.228766 | 0.015604 |
| K07A1.10    | K07A1.10   | chrI   | 0.228746 | 0.016492 |
| C50F7.10    | C50F7.10   | chrIV  | 0.228741 | 0.042572 |
| K08E4.2     | K08E4.2    | chrIV  | 0.228677 | 0.046866 |
| H10E21.3    | nhr-80     | chrIII | 0.228573 | 0.043462 |
| ZK637.11    | cdc-25.3   | chrIII | 0.228429 | 0.018593 |
| Y54G11A.8   | ddl-3      | chrII  | 0.228371 | 0.036370 |
| Y17G7B.12   | Y17G7B.12  | chrII  | 0.228079 | 0.021478 |
| K10C9.3     | K10C9.3    | chrV   | 0.228050 | 0.022025 |
| C18E9.10    | C18E9.10   | chrII  | 0.227936 | 0.018543 |
| C03H5.3     | C03H5.3    | chrII  | 0.227717 | 0.016415 |
| T01H3.1     | vha-4      | chrII  | 0.227668 | 0.012122 |
| F35C5.6     | clcc-63    | chrII  | 0.227665 | 0.011482 |
| F22H10.3    | F22H10.3   | chrX   | 0.227655 | 0.013086 |
| F48F7.6     | F48F7.6    | chrX   | 0.227602 | 0.020742 |
| C16C8.16    | C16C8.16   | chrII  | 0.227478 | 0.018192 |
| ZK863.7     | rnp-1      | chrV   | 0.227470 | 0.014033 |
| T23B3.2     | T23B3.2    | chrI   | 0.227331 | 0.029447 |
| C23H3.2     | C23H3.2    | chrII  | 0.227139 | 0.018481 |
| C01B10.3    | C01B10.3   | chrIV  | 0.226999 | 0.034647 |
| ZK909.3     | ZK909.3    | chrI   | 0.226913 | 0.044920 |
| Y105C5B.15  | Y105C5B.15 | chrIV  | 0.226851 | 0.018887 |
| W02B12.2    | rsp-2      | chrII  | 0.226811 | 0.012471 |
| Y119D3B.12  | Y119D3B.12 | chrIII | 0.226787 | 0.017032 |
| C27A2.3     | ify-1      | chrII  | 0.226762 | 0.012199 |
| VW02B12L.3  | ebp-2      | chrII  | 0.226451 | 0.013568 |
| ZK353.1     | cyy-1      | chrIII | 0.226419 | 0.014227 |
| Y37E3.8     | Y37E3.8    | chrI   | 0.226163 | 0.011526 |
| Y4C6B.6     | Y4C6B.6    | chrIV  | 0.226154 | 0.025564 |
| W10D5.2     | nduf-7     | chrI   | 0.226144 | 0.013037 |
| ZK1098.1    | ZK1098.1   | chrIII | 0.226139 | 0.013206 |
| T02D1.8     | T02D1.8    | chrIV  | 0.225997 | 0.036895 |
| ZK177.5     | cyp-44A1   | chrII  | 0.225885 | 0.019530 |
| K03E6.6     | pfn-3      | chrX   | 0.225736 | 0.047542 |
| F17A2.5     | ceh-40     | chrX   | 0.225687 | 0.042579 |
| T13B5.8     | sut-1      | chrII  | 0.225630 | 0.025344 |
| F46A9.5     | skr-1      | chrI   | 0.225458 | 0.012947 |
| F59C6.4     | exos-3     | chrI   | 0.225098 | 0.017313 |
| C37H5.9     | nas-9      | chrV   | 0.225059 | 0.042470 |
| C15F1.6     | art-1      | chrII  | 0.225018 | 0.013098 |
| F56B3.12    | skr-18     | chrIV  | 0.225001 | 0.018492 |
| K08E7.1     | eak-7      | chrIV  | 0.224894 | 0.018141 |
| C26E6.11    | mmab-1     | chrIII | 0.224778 | 0.021914 |
| D1037.3     | ftn-2      | chrI   | 0.224744 | 0.013473 |
| F56B3.11    | F56B3.11   | chrIV  | 0.224532 | 0.017285 |
| F56A11.5    | F56A11.5   | chrIV  | 0.224424 | 0.015691 |
| C18D11.3    | C18D11.3   | chrIII | 0.224189 | 0.015213 |
| C18E9.6     | tomm-40    | chrII  | 0.224105 | 0.014109 |
| Y110A2AL.14 | sqv-2      | chrII  | 0.224103 | 0.020820 |
| F59B1.8     | F59B1.8    | chrV   | 0.224068 | 0.021789 |
| F46H6.1     | rhi-1      | chrX   | 0.223799 | 0.021733 |
| M02B7.2     | M02B7.2    | chrIV  | 0.223600 | 0.044259 |
| K01A11.2    | K01A11.2   | chrIII | 0.223552 | 0.032950 |
| T12G3.8     | bre-5      | chrIV  | 0.223377 | 0.027059 |
| K02G10.1    | K02G10.1   | chrX   | 0.223359 | 0.048907 |
| B0280.3     | rpia-1     | chrIII | 0.222979 | 0.016223 |
| VF36H2L.1   | aph-1      | chrI   | 0.222964 | 0.020518 |
| F42A10.9    | F42A10.9   | chrIII | 0.222770 | 0.045578 |
| R107.2      | R107.2     | chrIII | 0.222739 | 0.039096 |
| Y48A5A.2    | ulp-3      | chrIV  | 0.222693 | 0.036050 |
| Y45F3A.9    | Y45F3A.9   | chrIII | 0.222669 | 0.037143 |
| R07H5.3     | R07H5.3    | chrIV  | 0.222631 | 0.036241 |

|            |            |        |          |          |
|------------|------------|--------|----------|----------|
| Y57E12AL.6 | Y57E12AL.6 | chrV   | 0.222614 | 0.015513 |
| F54D5.11   | F54D5.11   | chrII  | 0.222530 | 0.018348 |
| C05E11.5   | amt-4      | chrX   | 0.222503 | 0.024017 |
| Y75B8A.27  | pqn-92     | chrIII | 0.222226 | 0.033052 |
| C10B5.1    | C10B5.1    | chrV   | 0.222197 | 0.047133 |
| B0495.9    | B0495.9    | chrII  | 0.222167 | 0.021321 |
| C52G5.2    | C52G5.2    | chrX   | 0.222073 | 0.040363 |
| C02F5.4    | cids-1     | chrIII | 0.222023 | 0.018128 |
| R05H11.1   | R05H11.1   | chrIII | 0.222021 | 0.039052 |
| C55B7.9    | mdt-18     | chrI   | 0.221938 | 0.022703 |
| F02E8.3    | aps-2      | chrX   | 0.221905 | 0.027643 |
| C27B7.2    | C27B7.2    | chrIV  | 0.221770 | 0.035609 |
| F40G9.3    | ubc-20     | chrIII | 0.221678 | 0.015531 |
| F52H3.7    | lec-2      | chrII  | 0.221634 | 0.014586 |
| R04D3.2    | R04D3.2    | chrX   | 0.221384 | 0.020434 |
| E01A2.6    | E01A2.6    | chrI   | 0.221331 | 0.014841 |
| Y53C12A.10 | Y53C12A.10 | chrII  | 0.221068 | 0.026340 |
| C32E8.2    | rpl-13     | chrI   | 0.221066 | 0.013781 |
| C50B8.3    | C50B8.3    | chrV   | 0.220899 | 0.026994 |
| F33H2.6    | F33H2.6    | chrI   | 0.220885 | 0.020848 |
| Y49E10.2   | glrx-5     | chrIII | 0.220415 | 0.029374 |
| M04C3.1    | M04C3.1    | chrV   | 0.220378 | 0.037921 |
| ZK1307.1   | ZK1307.1   | chrII  | 0.220235 | 0.025148 |
| F55E10.6   | F55E10.6   | chrX   | 0.220010 | 0.039582 |
| C31E10.7   | C31E10.7   | chrX   | 0.220003 | 0.018000 |
| T25E12.6   | T25E12.6   | chrV   | 0.219312 | 0.040161 |
| K07H8.3    | K07H8.3    | chrIV  | 0.219215 | 0.018608 |
| F37C12.3   | F37C12.3   | chrIII | 0.219150 | 0.018126 |
| ZK792.2    | inx-8      | chrIV  | 0.219021 | 0.018870 |
| H20J04.8   | sap-1      | chrII  | 0.218928 | 0.018593 |
| C06E8.3    | prk-1      | chrIII | 0.218786 | 0.042982 |
| Y71F9AL.8  | Y71F9AL.8  | chrI   | 0.218753 | 0.037258 |
| W03A5.4    | W03A5.4    | chrIII | 0.218742 | 0.021440 |
| T25D3.2    | T25D3.2    | chrII  | 0.218645 | 0.023482 |
| F48C1.6    | F48C1.6    | chrI   | 0.218620 | 0.026703 |
| F54D10.7   | F54D10.7   | chrII  | 0.218451 | 0.030100 |
| ZK632.12   | ZK632.12   | chrIII | 0.218398 | 0.020912 |
| F42G8.10   | F42G8.10   | chrIV  | 0.218394 | 0.017502 |
| Y57G11C.4  | vti-1      | chrIV  | 0.218268 | 0.035499 |
| T22A3.3    | lst-1      | chrI   | 0.218256 | 0.016961 |
| T03F1.8    | T03F1.8    | chrI   | 0.218119 | 0.021710 |
| F26E4.4    | F26E4.4    | chrI   | 0.218047 | 0.018909 |
| Y45F3A.2   | rab-30     | chrIII | 0.217878 | 0.042304 |
| ZC477.3    | ZC477.3    | chrIV  | 0.217714 | 0.019450 |
| C14F5.1    | dct-1      | chrX   | 0.217676 | 0.033683 |
| R11A5.2    | nud-2      | chrI   | 0.217554 | 0.018766 |
| ZK809.3    | ZK809.3    | chrIV  | 0.217466 | 0.017539 |
| F46F11.5   | vha-10     | chrI   | 0.217377 | 0.016914 |
| C47E12.2   | C47E12.2   | chrIV  | 0.217228 | 0.021306 |
| C49H3.9    | C49H3.9    | chrIV  | 0.216914 | 0.020207 |
| F39B2.6    | rps-26     | chrI   | 0.216872 | 0.016223 |
| Y37D8A.1   | arx-5      | chrIII | 0.216829 | 0.021867 |
| Y71F9AM.6  | trap-1     | chrI   | 0.216768 | 0.016448 |
| Y38C1AA.11 | prdx-6     | chrIV  | 0.216707 | 0.028354 |
| W01D2.5    | W01D2.5    | chrII  | 0.216589 | 0.021881 |
| Y40B1B.5   | eif-3.J    | chrI   | 0.216468 | 0.019777 |
| K01C8.7    | K01C8.7    | chrII  | 0.216401 | 0.040365 |
| F42A10.3   | F42A10.3   | chrIII | 0.216231 | 0.029507 |
| C13C4.5    | C13C4.5    | chrV   | 0.216150 | 0.032889 |
| T06E8.1    | acl-2      | chrV   | 0.216136 | 0.023341 |
| T05A7.4    | hmg-11     | chrII  | 0.215848 | 0.024258 |
| F55H12.4   | F55H12.4   | chrI   | 0.215838 | 0.020932 |
| C15F1.7    | sod-1      | chrII  | 0.215800 | 0.018513 |

|            |            |        |          |          |
|------------|------------|--------|----------|----------|
| Y74C9A.3   | Y74C9A.3   | chrI   | 0.215774 | 0.029350 |
| Y73B6BL.2  | htp-2      | chrIV  | 0.215610 | 0.024826 |
| F31D4.1    | exos-7     | chrV   | 0.215568 | 0.025793 |
| ZK856.11   | ZK856.11   | chrV   | 0.215175 | 0.022313 |
| T05G11.1   | pzf-1      | chrV   | 0.214722 | 0.034187 |
| F15G9.1    | F15G9.1    | chrX   | 0.214655 | 0.025949 |
| F59F4.4    | acl-1      | chrX   | 0.214633 | 0.025910 |
| Y45G5AL.1  | Y45G5AL.1  | chrV   | 0.214503 | 0.021269 |
| E04F6.9    | E04F6.9    | chrII  | 0.214499 | 0.044707 |
| Y51H1A.3   | Y51H1A.3   | chrII  | 0.214481 | 0.020321 |
| F23H12.2   | tomm-20    | chrV   | 0.214367 | 0.021253 |
| C01F6.5    | aly-1      | chrIV  | 0.214362 | 0.029615 |
| C16C10.11  | har-1      | chrIII | 0.214345 | 0.019959 |
| F23B12.4   | F23B12.4   | chrV   | 0.214212 | 0.037580 |
| R11.1      | R11.1      | chrX   | 0.214161 | 0.036150 |
| C52E4.3    | snr-4      | chrV   | 0.214047 | 0.019030 |
| T03F6.1    | qdpr-1     | chrIII | 0.213825 | 0.021186 |
| W02G9.2    | kel-8      | chrV   | 0.213669 | 0.029548 |
| F25H2.5    | F25H2.5    | chrI   | 0.213639 | 0.017835 |
| D2030.4    | D2030.4    | chrI   | 0.213183 | 0.022253 |
| T22H2.6    | pgrn-1     | chrI   | 0.213149 | 0.026703 |
| Y57A10A.29 | Y57A10A.29 | chrII  | 0.212963 | 0.034630 |
| F54C8.2    | cpar-1     | chrIII | 0.212846 | 0.024822 |
| M01G5.3    | M01G5.3    | chrIII | 0.212636 | 0.026055 |
| DH11.2     | DH11.2     | chrII  | 0.212558 | 0.034226 |
| ZK686.3    | ZK686.3    | chrIII | 0.212443 | 0.019930 |
| B0379.1    | B0379.1    | chrI   | 0.212211 | 0.044606 |
| K11H12.8   | K11H12.8   | chrIV  | 0.212039 | 0.023767 |
| ZK792.6    | let-60     | chrIV  | 0.211989 | 0.021772 |
| F58H1.3    | F58H1.3    | chrV   | 0.211950 | 0.031525 |
| R12E2.1    | R12E2.1    | chrI   | 0.211946 | 0.025333 |
| W10G11.20  | dnc-3      | chrII  | 0.211845 | 0.036590 |
| T20F5.2    | pbs-4      | chrI   | 0.211792 | 0.020739 |
| Y73F8A.6   | ccg-1      | chrIV  | 0.211726 | 0.026618 |
| Y113G7A.9  | dcs-1      | chrV   | 0.211630 | 0.026520 |
| T07E3.5    | brc-2      | chrIII | 0.211554 | 0.031663 |
| Y60A3A.7   | Y60A3A.7   | chrV   | 0.211512 | 0.025794 |
| Y62E10A.17 | Y62E10A.17 | chrIV  | 0.211415 | 0.031245 |
| D1007.10   | D1007.10   | chrI   | 0.211201 | 0.044584 |
| F08B1.3    | F08B1.3    | chrII  | 0.210980 | 0.043884 |
| F59A3.12   | F59A3.12   | chrI   | 0.210867 | 0.030410 |
| T07F10.3   | T07F10.3   | chrV   | 0.210784 | 0.026226 |
| ZK721.2    | unc-27     | chrX   | 0.210764 | 0.020207 |
| R06C7.4    | cpg-3      | chrI   | 0.210720 | 0.020321 |
| ZK829.7    | ZK829.7    | chrIV  | 0.210662 | 0.021698 |
| F35E12.6   | F35E12.6   | chrV   | 0.210595 | 0.026573 |
| C35D10.13  | C35D10.13  | chrIII | 0.210491 | 0.024831 |
| F45B8.1    | rgs-11     | chrX   | 0.210284 | 0.043678 |
| F55F8.4    | cir-1      | chrI   | 0.210242 | 0.022219 |
| ZK1320.1   | gstk-1     | chrII  | 0.210223 | 0.039639 |
| K08D9.3    | apx-1      | chrV   | 0.210090 | 0.023048 |
| T24H10.3   | dnj-23     | chrII  | 0.210064 | 0.024317 |
| F54D10.5   | F54D10.5   | chrII  | 0.209881 | 0.030763 |
| F57B9.1    | F57B9.1    | chrIII | 0.209831 | 0.045107 |
| Y82E9BR.14 | Y82E9BR.14 | chrIII | 0.209673 | 0.026733 |
| F55H2.7    | F55H2.7    | chrIII | 0.209673 | 0.027588 |
| Y39A3CR.7  | pqn-82     | chrIII | 0.209611 | 0.032613 |
| F19B10.9   | sea-1      | chrII  | 0.209477 | 0.034995 |
| C05D9.1    | snx-1      | chrX   | 0.209350 | 0.028311 |
| C01F1.2    | sco-1      | chrII  | 0.209268 | 0.031573 |
| ZK1236.2   | cec-1      | chrIII | 0.209188 | 0.029374 |
| C43E11.4   | tufm-2     | chrI   | 0.209104 | 0.025162 |
| F36F12.8   | ztf-28     | chrV   | 0.208824 | 0.036732 |

|            |            |        |          |          |
|------------|------------|--------|----------|----------|
| Y62E10A.10 | Y62E10A.10 | chrIV  | 0.208762 | 0.026700 |
| F32A11.2   | hpr-17     | chrII  | 0.208641 | 0.028311 |
| F43G9.9    | cpn-1      | chrI   | 0.208615 | 0.022444 |
| C16C10.8   | C16C10.8   | chrIII | 0.208233 | 0.037394 |
| W02F12.4   | W02F12.4   | chrV   | 0.208058 | 0.029166 |
| F33E11.2   | F33E11.2   | chrV   | 0.207870 | 0.029744 |
| F55B12.5   | nrf-5      | chrV   | 0.207649 | 0.031531 |
| C31C9.2    | C31C9.2    | chrII  | 0.207499 | 0.028154 |
| C25A1.8    | clec-87    | chrI   | 0.207323 | 0.021953 |
| C28C12.7   | spp-10     | chrIV  | 0.207289 | 0.023838 |
| T24D1.4    | tag-179    | chrI   | 0.207174 | 0.034167 |
| C25D7.7    | rap-2      | chrV   | 0.207044 | 0.030410 |
| T07C4.5    | ttr-15     | chrIII | 0.206863 | 0.023242 |
| Y97E10AR.7 | Y97E10AR.7 | chrV   | 0.206855 | 0.032263 |
| C18D11.4   | rsp-8      | chrIII | 0.206478 | 0.025091 |
| C40H1.6    | C40H1.6    | chrIII | 0.206429 | 0.037025 |
| ZK1058.9   | ZK1058.9   | chrIII | 0.206364 | 0.030697 |
| C33H5.18   | C33H5.18   | chrIV  | 0.206231 | 0.029579 |
| C56C10.10  | C56C10.10  | chrII  | 0.206225 | 0.033375 |
| Y48E1B.8   | Y48E1B.8   | chrII  | 0.206138 | 0.041084 |
| Y39G10AL.3 | cdk-7      | chrI   | 0.206111 | 0.029166 |
| ZK546.17   | cbic-1     | chrII  | 0.205812 | 0.033891 |
| T20D3.5    | T20D3.5    | chrIV  | 0.205669 | 0.032696 |
| F36F2.4    | syx-7      | chrI   | 0.205532 | 0.032422 |
| H26D21.1   | hus-1      | chrI   | 0.205459 | 0.043000 |
| C32D5.9    | lgg-1      | chrII  | 0.205357 | 0.024415 |
| F26F4.12   | F26F4.12   | chrIII | 0.205186 | 0.037028 |
| C45B2.1    | C45B2.1    | chrX   | 0.204657 | 0.028217 |
| W02B12.10  | W02B12.10  | chrII  | 0.204594 | 0.030283 |
| F09E5.11   | F09E5.11   | chrII  | 0.204340 | 0.038541 |
| F32D8.4    | F32D8.4    | chrV   | 0.204256 | 0.038868 |
| F47B7.1    | F47B7.1    | chrX   | 0.203990 | 0.032487 |
| F42G8.12   | isp-1      | chrIV  | 0.203831 | 0.026021 |
| C09D4.5    | rpl-19     | chrI   | 0.203666 | 0.024709 |
| K08F11.4   | yars-1     | chrIV  | 0.203572 | 0.031663 |
| F43G9.3    | F43G9.3    | chrI   | 0.203542 | 0.044724 |
| F44G4.2    | F44G4.2    | chrII  | 0.203502 | 0.028013 |
| F08H9.7    | clec-56    | chrV   | 0.203422 | 0.042685 |
| Y75B8A.16  | Y75B8A.16  | chrIII | 0.203391 | 0.035625 |
| Y111B2A.15 | tpst-1     | chrIII | 0.203269 | 0.032141 |
| ZK783.2    | upp-1      | chrIII | 0.203251 | 0.030233 |
| H27M09.2   | rpb-5      | chrI   | 0.203110 | 0.028675 |
| Y48G1A.6   | mbtr-1     | chrI   | 0.203033 | 0.037082 |
| D1007.16   | eaf-1      | chrI   | 0.202950 | 0.029890 |
| W08F4.8    | cdc-37     | chrII  | 0.202599 | 0.028167 |
| C09B8.6    | hsp-25     | chrX   | 0.202520 | 0.030850 |
| F40F11.1   | rps-11     | chrIV  | 0.202496 | 0.025756 |
| Y54H5A.4   | oxy-4      | chrIII | 0.202381 | 0.045578 |
| Y25C1A.13  | Y25C1A.13  | chrII  | 0.201893 | 0.046821 |
| T05H4.5    | T05H4.5    | chrV   | 0.201833 | 0.028775 |
| M02D8.1    | M02D8.1    | chrX   | 0.201564 | 0.032799 |
| F13D12.2   | ldh-1      | chrII  | 0.201443 | 0.030273 |
| C09G4.2    | C09G4.2    | chrIV  | 0.201354 | 0.038106 |
| F25B5.3    | F25B5.3    | chrIII | 0.201340 | 0.028897 |
| F36A2.7    | F36A2.7    | chrI   | 0.201267 | 0.028239 |
| C14B9.7    | rpl-21     | chrIII | 0.201219 | 0.026752 |
| R05F9.9    | R05F9.9    | chrII  | 0.200919 | 0.038998 |
| C43H8.2    | C43H8.2    | chrI   | 0.200883 | 0.038771 |
| C32D5.8    | C32D5.8    | chrII  | 0.200709 | 0.040485 |
| F15B10.1   | F15B10.1   | chrIV  | 0.200526 | 0.032734 |
| W04A8.1    | W04A8.1    | chrI   | 0.200299 | 0.043130 |
| R10E11.8   | vha-1      | chrIII | 0.200098 | 0.029617 |
| C25H3.7    | C25H3.7    | chrII  | 0.200012 | 0.036557 |

|            |            |        |          |          |
|------------|------------|--------|----------|----------|
| K07F5.15   | K07F5.15   | chrIV  | 0.199984 | 0.034107 |
| F31C3.4    | F31C3.4    | chrI   | 0.199885 | 0.032121 |
| F35G2.2    | F35G2.2    | chrIV  | 0.199763 | 0.039874 |
| M18.7      | aly-3      | chrIV  | 0.199488 | 0.030191 |
| M01E11.4   | pqn-52     | chrI   | 0.199444 | 0.030019 |
| ZK742.5    | lbp-4      | chrV   | 0.199326 | 0.043119 |
| B0207.4    | air-2      | chrI   | 0.199234 | 0.032780 |
| Y57G11C.43 | Y57G11C.43 | chrIV  | 0.199215 | 0.042277 |
| F32B5.8    | cpz-1      | chrI   | 0.199077 | 0.029528 |
| W02D9.3    | W02D9.3    | chrI   | 0.198690 | 0.047662 |
| F40A3.3    | F40A3.3    | chrV   | 0.198660 | 0.035440 |
| F10B5.1    | rpl-10     | chrII  | 0.198603 | 0.028943 |
| Y54F10AL.1 | Y54F10AL.1 | chrIII | 0.198417 | 0.038301 |
| D2030.9    | wdr-23     | chrI   | 0.198373 | 0.033711 |
| F29F11.3   | tut-2      | chrV   | 0.198362 | 0.044757 |
| C53A5.17   | C53A5.17   | chrV   | 0.198146 | 0.047662 |
| T04C9.4    | mlp-1      | chrIII | 0.198138 | 0.042010 |
| ZK418.4    | lin-37     | chrIII | 0.198105 | 0.037631 |
| F58G1.4    | dct-18     | chrII  | 0.198057 | 0.032607 |
| T27E9.7    | abcf-2     | chrIII | 0.197911 | 0.032590 |
| C10G8.8    | C10G8.8    | chrV   | 0.197805 | 0.037244 |
| C45G9.2    | C45G9.2    | chrIII | 0.197741 | 0.043626 |
| Y65B4BR.5  | Y65B4BR.5  | chrI   | 0.197375 | 0.030347 |
| C14F11.4   | C14F11.4   | chrX   | 0.197256 | 0.046823 |
| Y37E3.7    | rla-1      | chrI   | 0.197205 | 0.030654 |
| Y54E2A.8   | Y54E2A.8   | chrII  | 0.197055 | 0.045315 |
| ZK1307.9   | ZK1307.9   | chrII  | 0.197019 | 0.040305 |
| Y50E8A.4   | unc-61     | chrV   | 0.196816 | 0.033711 |
| C18E9.11   | ooc-5      | chrII  | 0.196690 | 0.035523 |
| F22A3.1    | ets-4      | chrX   | 0.196659 | 0.048565 |
| K08E3.7    | pdr-1      | chrIII | 0.196408 | 0.037488 |
| Y48G1C.12  | Y48G1C.12  | chrI   | 0.196367 | 0.047457 |
| F40E10.3   | csq-1      | chrX   | 0.196228 | 0.034760 |
| Y54G2A.31  | ubc-13     | chrIV  | 0.196171 | 0.036863 |
| W01A11.2   | W01A11.2   | chrV   | 0.196130 | 0.042329 |
| F57C2.5    | F57C2.5    | chrII  | 0.196047 | 0.037132 |
| C03D6.5    | asfl-1     | chrI   | 0.195860 | 0.038857 |
| R09B3.1    | exo-3      | chrI   | 0.195746 | 0.036735 |
| T22C1.6    | T22C1.6    | chrI   | 0.195610 | 0.037941 |
| ZK973.10   | lpd-5      | chrI   | 0.195569 | 0.037339 |
| C40H1.1    | cpb-1      | chrIII | 0.195439 | 0.040166 |
| Y69H2.14   | Y69H2.14   | chrV   | 0.195233 | 0.032709 |
| ZC513.7    | ZC513.7    | chrV   | 0.195167 | 0.035105 |
| R12C12.5   | R12C12.5   | chrII  | 0.195144 | 0.046251 |
| C37C3.1    | C37C3.1    | chrV   | 0.194843 | 0.045153 |
| H38K22.3   | tag-131    | chrIII | 0.194758 | 0.048179 |
| T10H9.3    | syx-18     | chrV   | 0.194593 | 0.038930 |
| DC2.3      | DC2.3      | chrV   | 0.194574 | 0.046086 |
| C25A1.12   | C25A1.12   | chrI   | 0.194321 | 0.040499 |
| K04F10.7   | K04F10.7   | chrI   | 0.193926 | 0.040922 |
| F21H12.1   | F21H12.1   | chrII  | 0.193590 | 0.041240 |
| F27C1.2    | F27C1.2    | chrI   | 0.193547 | 0.037921 |
| Y87G2A.9   | ubc-14     | chrI   | 0.193407 | 0.047849 |
| Y43E12A.1  | cyb-2.1    | chrIV  | 0.193331 | 0.045347 |
| F52B11.2   | F52B11.2   | chrIV  | 0.193296 | 0.046903 |
| C25H3.9    | C25H3.9    | chrII  | 0.193151 | 0.036677 |
| C10G8.5    | ncx-2      | chrV   | 0.192812 | 0.043743 |
| F57B9.7    | flap-1     | chrIII | 0.192792 | 0.043735 |
| F32A5.1    | ada-2      | chrII  | 0.192452 | 0.041924 |
| T26E3.3    | par-6      | chrI   | 0.192442 | 0.043462 |
| C36F7.2    | C36F7.2    | chrI   | 0.192294 | 0.046383 |
| F53H4.2    | F53H4.2    | chrX   | 0.192000 | 0.041153 |
| Y14H12B.2  | Y14H12B.2  | chrII  | 0.191965 | 0.041742 |



|            |            |        |           |          |
|------------|------------|--------|-----------|----------|
| T02E1.5    | dhs-3      | chrI   | 0.191860  | 0.048349 |
| F52B5.6    | rpl-25.2   | chrI   | 0.191101  | 0.036734 |
| Y43C5A.2   | Y43C5A.2   | chrIV  | 0.191073  | 0.047355 |
| R04F11.3   | R04F11.3   | chrV   | 0.190729  | 0.040163 |
| T21H3.1    | T21H3.1    | chrV   | 0.190409  | 0.038016 |
| T21B10.4   | T21B10.4   | chrII  | 0.190229  | 0.044514 |
| Y47G6A.2   | inx-22     | chrI   | 0.190136  | 0.042528 |
| W02D7.7    | sel-9      | chrV   | 0.189820  | 0.043230 |
| F10G8.5    | ncs-2      | chrI   | 0.189633  | 0.043036 |
| F58A4.4    | pri-1      | chrIII | 0.189375  | 0.049775 |
| ZC513.6    | oma-2      | chrV   | 0.188947  | 0.039606 |
| F10D11.1   | sod-2      | chrI   | 0.187889  | 0.044935 |
| Y75B12B.1  | Y75B12B.1  | chrV   | 0.187739  | 0.043304 |
| Y49E10.3   | pph-4.2    | chrIII | 0.187389  | 0.046333 |
| C16C10.6   | ccdc-55    | chrIII | 0.186481  | 0.049548 |
| Y71H2B.2   | Y71H2B.2   | chrIII | 0.186403  | 0.048914 |
| C34F6.2    | col-178    | chrX   | 0.186320  | 0.042515 |
| F28H7.3    | F28H7.3    | chrV   | 0.186179  | 0.047949 |
| W03D2.4    | pcn-1      | chrIV  | 0.186141  | 0.043000 |
| F49C12.9   | F49C12.9   | chrIV  | 0.185925  | 0.047949 |
| M18.8      | M18.8      | chrIV  | 0.185846  | 0.049468 |
| C15H11.7   | pas-1      | chrV   | 0.184456  | 0.048522 |
| F40F8.10   | rps-9      | chrII  | 0.184396  | 0.044344 |
| F32D8.6    | emo-1      | chrV   | 0.183724  | 0.047643 |
| F25H2.11   | tct-1      | chrI   | 0.181708  | 0.048278 |
| W03G11.1   | col-181    | chrX   | 0.181621  | 0.048115 |
| T05G5.10   | iff-1      | chrIII | 0.180875  | 0.049523 |
| K01G5.7    | tbb-1      | chrIII | -0.181777 | 0.048691 |
| W10D5.3    | gei-17     | chrI   | -0.183223 | 0.049809 |
| ZK1251.9   | dcaf-1     | chrIV  | -0.183995 | 0.049032 |
| C32E8.8    | ptr-2      | chrI   | -0.184067 | 0.046903 |
| T19B10.8   | T19B10.8   | chrV   | -0.185594 | 0.046938 |
| M03C11.7   | M03C11.7   | chrIII | -0.186263 | 0.048013 |
| T10B5.5    | cct-7      | chrV   | -0.186992 | 0.042852 |
| K04F10.4   | bli-4      | chrI   | -0.188033 | 0.042572 |
| F28B3.8    | imb-1      | chrI   | -0.188289 | 0.043279 |
| F08F3.2    | acl-6      | chrV   | -0.188652 | 0.044382 |
| F28D1.10   | gex-3      | chrIV  | -0.188761 | 0.044011 |
| T11G6.1    | hars-1     | chrIV  | -0.188791 | 0.044011 |
| C34F11.3   | C34F11.3   | chrII  | -0.189127 | 0.045514 |
| C51F7.1    | frm-7      | chrV   | -0.189709 | 0.044658 |
| F59E10.2   | cyn-4      | chrII  | -0.189904 | 0.046334 |
| ZK270.2    | frm-1      | chrI   | -0.189923 | 0.040662 |
| C04A2.7    | dnj-5      | chrII  | -0.190013 | 0.038664 |
| K08F9.2    | aipl-1     | chrV   | -0.190225 | 0.040271 |
| Y57G11C.15 | Y57G11C.15 | chrIV  | -0.190519 | 0.037294 |
| T04C9.1    | T04C9.1    | chrIII | -0.190520 | 0.042329 |
| F13H10.4   | F13H10.4   | chrIV  | -0.190742 | 0.040662 |
| F37E3.1    | ncbp-1     | chrI   | -0.190864 | 0.040662 |
| T25B6.2    | T25B6.2    | chrX   | -0.190881 | 0.043606 |
| B0041.2    | ain-2      | chrI   | -0.191143 | 0.039345 |
| Y106G6H.7  | sec-8      | chrI   | -0.191270 | 0.044996 |
| C18E9.3    | szy-20     | chrII  | -0.191458 | 0.043176 |
| C13F10.6   | C13F10.6   | chrV   | -0.191506 | 0.043566 |
| W03F8.10   | W03F8.10   | chrIV  | -0.191637 | 0.039697 |
| C42D8.2    | vit-2      | chrX   | -0.191647 | 0.035745 |
| Y46G5A.17  | cpt-1      | chrII  | -0.191713 | 0.037856 |
| F26F12.3   | F26F12.3   | chrV   | -0.191967 | 0.040935 |
| T07A9.9    | T07A9.9    | chrIV  | -0.192320 | 0.037437 |
| E03A3.2    | rcq-5      | chrIII | -0.192982 | 0.049809 |
| F29D11.2   | capg-1     | chrI   | -0.193121 | 0.037080 |
| C43E11.11  | cogc-5     | chrI   | -0.193535 | 0.039606 |
| T07A9.6    | daf-18     | chrIV  | -0.193658 | 0.034427 |

|            |            |        |           |          |
|------------|------------|--------|-----------|----------|
| T05C12.7   | cct-1      | chrII  | -0.193788 | 0.034777 |
| K04A8.6    | dre-1      | chrV   | -0.194044 | 0.047315 |
| ZK1058.1   | mmcm-1     | chrIII | -0.194243 | 0.036785 |
| T21B10.7   | cct-2      | chrII  | -0.194340 | 0.034465 |
| B0414.7    | mtk-1      | chrI   | -0.194615 | 0.037529 |
| F16B4.8    | cdc-25.2   | chrV   | -0.194995 | 0.042396 |
| M106.4     | M106.4     | chrII  | -0.195706 | 0.036297 |
| W10G6.3    | mua-6      | chrX   | -0.195967 | 0.039731 |
| Y48E1A.1   | Y48E1A.1   | chrII  | -0.196025 | 0.041758 |
| B0361.3    | B0361.3    | chrIII | -0.196466 | 0.039606 |
| T02G5.9    | kars-1     | chrII  | -0.196502 | 0.031819 |
| R03E1.1    | sym-4      | chrX   | -0.196594 | 0.040464 |
| T05G5.8    | vps-53     | chrIII | -0.196842 | 0.040945 |
| C53A5.6    | C53A5.6    | chrV   | -0.196987 | 0.035412 |
| H27M09.4   | dpy-14     | chrI   | -0.197231 | 0.034647 |
| Y74C9A.4   | Y74C9A.4   | chrI   | -0.197233 | 0.035976 |
| C06A5.6    | C06A5.6    | chrI   | -0.197568 | 0.033826 |
| K03D10.3   | mys-2      | chrI   | -0.197640 | 0.041903 |
| R05G6.8    | plc-4      | chrIV  | -0.197914 | 0.037675 |
| T12E12.2   | T12E12.2   | chrIV  | -0.197962 | 0.035625 |
| D1044.6    | D1044.6    | chrIII | -0.198070 | 0.031966 |
| F12F6.5    | srgp-1     | chrIV  | -0.198360 | 0.030509 |
| C28C12.10  | tag-77     | chrIV  | -0.198676 | 0.035427 |
| C13B9.3    | C13B9.3    | chrIII | -0.198797 | 0.032170 |
| F20D12.2   | F20D12.2   | chrIV  | -0.198808 | 0.031787 |
| T19A6.2    | ngp-1      | chrI   | -0.199220 | 0.032085 |
| ZC506.1    | ZC506.1    | chrX   | -0.199301 | 0.037082 |
| T26A8.4    | T26A8.4    | chrIV  | -0.199327 | 0.031966 |
| F56A3.1    | fncm-1     | chrI   | -0.199563 | 0.045326 |
| C26D10.1   | ran-3      | chrII  | -0.199936 | 0.029630 |
| C44B7.11   | C44B7.11   | chrII  | -0.200314 | 0.048191 |
| F42G9.6    | F42G9.6    | chrIII | -0.200457 | 0.031882 |
| Y47A7.1    | Y47A7.1    | chrV   | -0.200869 | 0.036723 |
| F28C6.6    | suf-1      | chrII  | -0.200897 | 0.031423 |
| H15N14.2   | nsf-1      | chrI   | -0.201019 | 0.031677 |
| Y71G12B.24 | mppa-1     | chrI   | -0.201292 | 0.042253 |
| C34B7.2    | C34B7.2    | chrI   | -0.201542 | 0.031738 |
| D2085.5    | D2085.5    | chrII  | -0.201703 | 0.031312 |
| C38D4.5    | tag-325    | chrIII | -0.202037 | 0.031895 |
| F23H12.4   | sqt-3      | chrV   | -0.202306 | 0.031121 |
| ZC434.6    | aph-2      | chrI   | -0.202384 | 0.032986 |
| F09D1.1    | F09D1.1    | chrII  | -0.202487 | 0.032746 |
| Y71F9AL.10 | Y71F9AL.10 | chrI   | -0.203134 | 0.049063 |
| F46B6.7    | ztf-7      | chrV   | -0.203536 | 0.025529 |
| B0379.4    | scpl-1     | chrI   | -0.203687 | 0.031557 |
| T04F3.1    | T04F3.1    | chrV   | -0.205042 | 0.028085 |
| C05D2.10   | C05D2.10   | chrIII | -0.205165 | 0.030604 |
| F52E4.7    | sec-3      | chrX   | -0.205206 | 0.039983 |
| D2013.7    | eif-3.F    | chrII  | -0.205295 | 0.026171 |
| R01H10.7   | R01H10.7   | chrIII | -0.205718 | 0.028076 |
| Y105E8A.23 | Y105E8A.23 | chrI   | -0.206192 | 0.031618 |
| H24G06.1   | H24G06.1   | chrV   | -0.206236 | 0.037244 |
| Y34D9A.10  | vps-4      | chrI   | -0.206387 | 0.027864 |
| M02D8.4    | asns-2     | chrX   | -0.206555 | 0.030166 |
| T12G3.2    | T12G3.2    | chrIV  | -0.206747 | 0.026996 |
| JC8.10     | unc-26     | chrIV  | -0.206752 | 0.033043 |
| ZK353.6    | lap-1      | chrIII | -0.206775 | 0.025140 |
| H02I12.1   | cbd-1      | chrIV  | -0.206885 | 0.022231 |
| Y43F4B.6   | klp-19     | chrIII | -0.207803 | 0.022470 |
| K10B4.3    | K10B4.3    | chrII  | -0.207920 | 0.048824 |
| K04G2.3    | cdc-48.3   | chrI   | -0.208158 | 0.031557 |
| F54G8.3    | ina-1      | chrIII | -0.208213 | 0.027952 |
| Y49E10.19  | ani-1      | chrIII | -0.208246 | 0.022238 |

|            |          |        |           |          |
|------------|----------|--------|-----------|----------|
| F40F9.6    | aagr-3   | chrV   | -0.208479 | 0.022317 |
| R06C7.1    | R06C7.1  | chrI   | -0.208597 | 0.021536 |
| T01E8.5    | T01E8.5  | chrII  | -0.209037 | 0.023729 |
| Y48E1B.2   | Y48E1B.2 | chrII  | -0.209132 | 0.029386 |
| C34C12.3   | pph-6    | chrIII | -0.209342 | 0.028074 |
| C05D11.9   | C05D11.9 | chrIII | -0.209346 | 0.024999 |
| F22B5.9    | fars-3   | chrII  | -0.209635 | 0.023242 |
| K10C3.5    | K10C3.5  | chrI   | -0.209835 | 0.026598 |
| F45H7.2    | gei-1    | chrIII | -0.209921 | 0.048617 |
| K11D2.3    | unc-101  | chrI   | -0.210003 | 0.029548 |
| Y116A8C.16 | rom-4    | chrIV  | -0.210029 | 0.026868 |
| Y38A8.3    | ulp-2    | chrII  | -0.210316 | 0.022665 |
| C14B1.10   | C14B1.10 | chrIII | -0.210369 | 0.026905 |
| F59G1.3    | vps-35   | chrII  | -0.210639 | 0.022049 |
| Y48A6B.11  | rsa-2    | chrIII | -0.210764 | 0.022142 |
| C02F12.4   | tag-52   | chrX   | -0.210885 | 0.030892 |
| H16O14.1   | kcc-2    | chrIV  | -0.211087 | 0.028059 |
| F35A5.1    | F35A5.1  | chrX   | -0.211618 | 0.030625 |
| K04G2.6    | K04G2.6  | chrI   | -0.211770 | 0.025140 |
| Y56A3A.27  | top-3    | chrIII | -0.211815 | 0.030322 |
| F09C8.2    | F09C8.2  | chrX   | -0.212548 | 0.026213 |
| Y40B1B.8   | Y40B1B.8 | chrI   | -0.212559 | 0.027737 |
| H39E23.1   | par-1    | chrV   | -0.212848 | 0.020820 |
| T25G3.4    | T25G3.4  | chrI   | -0.213053 | 0.020441 |
| F58B3.5    | mars-1   | chrIV  | -0.213245 | 0.019437 |
| T21G5.5    | asd-2    | chrI   | -0.213468 | 0.031394 |
| T10G3.5    | eea-1    | chrV   | -0.213625 | 0.020667 |
| ZK524.4    | ZK524.4  | chrI   | -0.213840 | 0.021496 |
| C36A4.4    | C36A4.4  | chrIII | -0.214012 | 0.036336 |
| T20B12.1   | T20B12.1 | chrIII | -0.214141 | 0.023101 |
| T05A6.1    | cki-1    | chrII  | -0.214154 | 0.047643 |
| E04A4.4    | hoe-1    | chrIV  | -0.214413 | 0.019796 |
| K08D8.6    | K08D8.6  | chrIV  | -0.214538 | 0.026654 |
| F52D1.1    | aagr-4   | chrX   | -0.215044 | 0.028565 |
| F59A2.1    | npp-9    | chrIII | -0.215084 | 0.017310 |
| C06A5.7    | unc-94   | chrI   | -0.215149 | 0.021945 |
| F53C11.5   | F53C11.5 | chrV   | -0.215657 | 0.018357 |
| W08F4.6    | mlt-8    | chrII  | -0.215749 | 0.036114 |
| R08D7.3    | eif-3.D  | chrIII | -0.215822 | 0.017963 |
| C01C7.1    | ark-1    | chrIV  | -0.215929 | 0.021969 |
| C10G6.1    | egal-1   | chrIV  | -0.216031 | 0.036146 |
| F11E6.7    | F11E6.7  | chrIV  | -0.216130 | 0.017636 |
| D1009.1    | acs-22   | chrX   | -0.216158 | 0.023782 |
| K03D10.1   | kal-1    | chrI   | -0.216208 | 0.048413 |
| T20B5.3    | oga-1    | chrX   | -0.216408 | 0.030293 |
| R02D3.4    | R02D3.4  | chrIV  | -0.216585 | 0.019898 |
| C14B9.8    | C14B9.8  | chrIII | -0.216680 | 0.019395 |
| Y56A3A.17  | npp-16   | chrIII | -0.217093 | 0.019942 |
| W08D2.5    | catp-6   | chrIV  | -0.217963 | 0.017303 |
| C07H6.3    | cls-1    | chrIII | -0.218332 | 0.028050 |
| C14H10.2   | C14H10.2 | chrX   | -0.218390 | 0.031639 |
| F35G12.3   | sel-5    | chrIII | -0.218555 | 0.017579 |
| B0350.2    | unc-44   | chrIV  | -0.218727 | 0.016320 |
| F27D9.1    | unc-18   | chrX   | -0.218909 | 0.020678 |
| C15C8.3    | C15C8.3  | chrV   | -0.219075 | 0.024169 |
| C43H6.4    | C43H6.4  | chrX   | -0.219147 | 0.045989 |
| C24H12.4   | C24H12.4 | chrII  | -0.219227 | 0.018740 |
| ZK829.4    | ZK829.4  | chrIV  | -0.219278 | 0.014848 |
| Y57G11C.24 | eps-8    | chrIV  | -0.219632 | 0.020372 |
| Y17G7B.15  | cnt-1    | chrII  | -0.219683 | 0.021532 |
| F33G12.5   | F33G12.5 | chrII  | -0.219784 | 0.016184 |
| K08A8.2    | sox-2    | chrX   | -0.219972 | 0.033408 |
| T23G7.4    | sec-5    | chrII  | -0.220265 | 0.018069 |

|            |            |        |           |          |
|------------|------------|--------|-----------|----------|
| K07C11.4   | K07C11.4   | chrV   | -0.220352 | 0.039664 |
| F56D2.6    | F56D2.6    | chrIII | -0.220475 | 0.015775 |
| M03F8.3    | M03F8.3    | chrV   | -0.220599 | 0.015662 |
| C02E11.1   | nra-4      | chrV   | -0.220864 | 0.015563 |
| C36E8.5    | tbb-2      | chrIII | -0.221304 | 0.013743 |
| F52G2.2    | rsd-2      | chrIV  | -0.221579 | 0.015542 |
| C10H11.8   | C10H11.8   | chrI   | -0.221753 | 0.022674 |
| F11C7.4    | crb-1      | chrX   | -0.222091 | 0.030763 |
| C44F1.5    | acy-3      | chrIII | -0.222443 | 0.049282 |
| F44F1.7    | vet-6      | chrI   | -0.222460 | 0.028878 |
| ZK1127.11  | him-14     | chrII  | -0.222506 | 0.026384 |
| C37H5.8    | hsp-6      | chrV   | -0.222636 | 0.013481 |
| C35B1.1    | ubc-1      | chrIV  | -0.222651 | 0.026656 |
| H14N18.1   | unc-23     | chrV   | -0.222745 | 0.032287 |
| C07H6.5    | cgh-1      | chrIII | -0.223253 | 0.012818 |
| C50F2.4    | C50F2.4    | chrI   | -0.223867 | 0.042815 |
| D1081.2    | unc-120    | chrI   | -0.224163 | 0.031882 |
| ZK1067.6   | sym-2      | chrII  | -0.224376 | 0.043569 |
| F55C12.5   | F55C12.5   | chrII  | -0.224416 | 0.014113 |
| D2013.9    | ttII-12    | chrII  | -0.224810 | 0.015760 |
| F28B4.2    | rgl-1      | chrX   | -0.224908 | 0.024278 |
| T11G6.5    | T11G6.5    | chrIV  | -0.224946 | 0.014033 |
| F32H2.3    | spd-2      | chrI   | -0.225392 | 0.013098 |
| C04F12.1   | C04F12.1   | chrI   | -0.225568 | 0.016008 |
| F32B6.2    | F32B6.2    | chrIV  | -0.226065 | 0.013253 |
| C41C4.8    | cdc-48.2   | chrII  | -0.226151 | 0.011918 |
| C50F4.11   | mdf-1      | chrV   | -0.226700 | 0.012939 |
| B0464.1    | dars-1     | chrIII | -0.226780 | 0.012312 |
| Y71F9AL.12 | Y71F9AL.12 | chrI   | -0.227265 | 0.017633 |
| H19N07.1   | H19N07.1   | chrV   | -0.227341 | 0.011886 |
| F29B9.2    | F29B9.2    | chrIV  | -0.227806 | 0.012529 |
| Y34D9A.3   | Y34D9A.3   | chrI   | -0.227841 | 0.017268 |
| Y73B6BL.33 | hrpf-2     | chrIV  | -0.228076 | 0.012848 |
| Y92H12BL.1 | Y92H12BL.1 | chrI   | -0.228476 | 0.018549 |
| Y38C9A.1   | Y38C9A.1   | chrV   | -0.228999 | 0.013851 |
| Y38F2AL.4  | vha-3      | chrIV  | -0.229312 | 0.013572 |
| C55A6.2    | ttII-5     | chrV   | -0.229636 | 0.012470 |
| T27A3.2    | T27A3.2    | chrI   | -0.229671 | 0.011744 |
| C01H6.9    | C01H6.9    | chrI   | -0.230154 | 0.015068 |
| T05H10.5   | ufd-2      | chrII  | -0.230513 | 0.010819 |
| R13H4.4    | hmp-1      | chrV   | -0.230902 | 0.011124 |
| C36C9.1    | C36C9.1    | chrX   | -0.231367 | 0.015917 |
| T19B4.5    | T19B4.5    | chrI   | -0.231478 | 0.011807 |
| W03H9.4    | cacn-1     | chrII  | -0.231762 | 0.011962 |
| F59D8.1    | vit-3      | chrX   | -0.232034 | 0.009767 |
| F45F2.10   | F45F2.10   | chrV   | -0.232479 | 0.010290 |
| F59D8.2    | vit-4      | chrX   | -0.232587 | 0.010069 |
| F55A3.3    | F55A3.3    | chrI   | -0.232696 | 0.009761 |
| Y110A7A.17 | mat-1      | chrI   | -0.232713 | 0.010352 |
| C01B7.1    | ztf-12     | chrV   | -0.232936 | 0.013350 |
| T24H7.2    | T24H7.2    | chrII  | -0.233091 | 0.009798 |
| B0212.3    | B0212.3    | chrIV  | -0.233773 | 0.031247 |
| F32G8.6    | cat-4      | chrV   | -0.233858 | 0.013070 |
| T25C12.1   | lin-14     | chrX   | -0.234131 | 0.030635 |
| W05B2.1    | col-94     | chrIII | -0.234150 | 0.022200 |
| D2085.4    | D2085.4    | chrII  | -0.234978 | 0.010746 |
| C04A2.3    | egl-27     | chrII  | -0.235081 | 0.009310 |
| DY3.7      | sup-17     | chrI   | -0.235387 | 0.009165 |
| C44H4.2    | sym-5      | chrX   | -0.235418 | 0.041840 |
| K04H4.6    | crn-6      | chrIII | -0.235518 | 0.036132 |
| F02G3.1    | ncam-1     | chrX   | -0.235751 | 0.013853 |
| F59E12.1   | F59E12.1   | chrII  | -0.235844 | 0.009408 |
| C47E8.7    | unc-112    | chrV   | -0.235955 | 0.010744 |

|            |            |        |           |          |
|------------|------------|--------|-----------|----------|
| F46C3.1    | pek-1      | chrX   | -0.236231 | 0.013458 |
| K03A1.5    | sur-5      | chrX   | -0.236278 | 0.010017 |
| Y39B6A.2   | pph-5      | chrV   | -0.236626 | 0.012030 |
| F22B3.4    | F22B3.4    | chrIV  | -0.237123 | 0.008009 |
| ZC168.1    | ncx-3      | chrIV  | -0.237364 | 0.018346 |
| Y18D10A.6  | nhx-8      | chrI   | -0.237383 | 0.022586 |
| C18B2.5    | C18B2.5    | chrX   | -0.237710 | 0.010243 |
| W09G10.4   | apd-3      | chrII  | -0.238238 | 0.010190 |
| C05C8.7    | C05C8.7    | chrV   | -0.238275 | 0.011193 |
| C26H9A.1   | vha-7      | chrIV  | -0.238372 | 0.008777 |
| R05D8.8    | dhs-14     | chrV   | -0.238469 | 0.047457 |
| ZK637.8    | unc-32     | chrIII | -0.238881 | 0.008109 |
| F46F3.4    | ape-1      | chrV   | -0.238901 | 0.008074 |
| T08G11.4   | T08G11.4   | chrI   | -0.238907 | 0.010064 |
| M110.1     | col-76     | chrII  | -0.238938 | 0.026733 |
| T23D8.9    | sys-1      | chrI   | -0.239113 | 0.011292 |
| C48D1.2    | ced-3      | chrIV  | -0.239297 | 0.008098 |
| K03H1.2    | mog-1      | chrIII | -0.239330 | 0.008038 |
| Y65B4BL.2  | deps-1     | chrI   | -0.239350 | 0.008128 |
| F35B3.5    | pqn-34     | chrX   | -0.239371 | 0.011896 |
| F09C3.1    | pes-7      | chrI   | -0.239862 | 0.018320 |
| F54H12.1   | aco-2      | chrIII | -0.240279 | 0.007103 |
| W01A11.3   | unc-83     | chrV   | -0.240334 | 0.010316 |
| Y61A9LA.10 | Y61A9LA.10 | chrV   | -0.240469 | 0.008220 |
| ZC504.4    | mig-15     | chrX   | -0.240715 | 0.011226 |
| F41H10.6   | hdac-6     | chrIV  | -0.240721 | 0.007933 |
| Y105E8A.19 | Y105E8A.19 | chrI   | -0.240870 | 0.008659 |
| R148.3     | R148.3     | chrIII | -0.240935 | 0.008370 |
| Y48G8AL.1  | Y48G8AL.1  | chrI   | -0.241340 | 0.009144 |
| ZK686.2    | ZK686.2    | chrIII | -0.241425 | 0.008766 |
| K07F5.13   | npp-1      | chrIV  | -0.241507 | 0.007785 |
| F18E2.2    | abcf-1     | chrV   | -0.242141 | 0.007461 |
| Y56A3A.31  | Y56A3A.31  | chrIII | -0.242364 | 0.013572 |
| Y113G7B.18 | mdt-17     | chrV   | -0.242462 | 0.007917 |
| Y40B1A.4   | sptf-3     | chrI   | -0.242507 | 0.009368 |
| W02B3.2    | grk-2      | chrIII | -0.242616 | 0.036590 |
| T05E8.3    | T05E8.3    | chrI   | -0.242767 | 0.008037 |
| F21D5.3    | F21D5.3    | chrIV  | -0.242929 | 0.019240 |
| Y73F8A.25  | Y73F8A.25  | chrIV  | -0.243030 | 0.008170 |
| H20J04.2   | H20J04.2   | chrII  | -0.243657 | 0.007516 |
| F47G4.3    | gpdh-1     | chrI   | -0.243657 | 0.021539 |
| C47D12.8   | C47D12.8   | chrII  | -0.243820 | 0.007984 |
| C04F1.3    | lim-7      | chrI   | -0.243907 | 0.047886 |
| K07C11.9   | cogc-6     | chrV   | -0.244136 | 0.008560 |
| ZK792.5    | ZK792.5    | chrIV  | -0.244474 | 0.007460 |
| T02C12.1   | hum-5      | chrIII | -0.244479 | 0.009837 |
| F07A11.3   | npp-5      | chrII  | -0.244944 | 0.007044 |
| W05E10.3   | ceh-32     | chrV   | -0.245171 | 0.014995 |
| Y105C5A.1  | Y105C5A.1  | chrIV  | -0.245202 | 0.018385 |
| Y38F2AL.1  | nsy-4      | chrIV  | -0.245252 | 0.030763 |
| C14B9.2    | C14B9.2    | chrIII | -0.245294 | 0.008055 |
| D1081.8    | D1081.8    | chrI   | -0.245459 | 0.006239 |
| C02C6.1    | dyn-1      | chrX   | -0.245581 | 0.007653 |
| W03D8.6    | itx-1      | chrI   | -0.246012 | 0.013468 |
| ZK546.1    | zyg-12     | chrII  | -0.246209 | 0.006311 |
| Y41E3.4    | qars-1     | chrIV  | -0.246390 | 0.006283 |
| F09F7.4    | F09F7.4    | chrIII | -0.246482 | 0.005934 |
| ZK512.3    | ced-11     | chrIII | -0.247081 | 0.024421 |
| Y71G12B.9  | lin-65     | chrI   | -0.247289 | 0.008063 |
| Y37A1B.1   | lst-3      | chrIV  | -0.247314 | 0.005560 |
| C07H6.4    | C07H6.4    | chrIII | -0.247342 | 0.006281 |
| F01E11.1   | ugt-57     | chrX   | -0.247483 | 0.046857 |
| F48A11.5   | ubxn-3     | chrII  | -0.247574 | 0.005900 |

|            |            |        |           |          |
|------------|------------|--------|-----------|----------|
| T13H5.6    | T13H5.6    | chrII  | -0.247660 | 0.023822 |
| T14G10.5   | T14G10.5   | chrIV  | -0.247806 | 0.005795 |
| F40F4.6    | F40F4.6    | chrX   | -0.247850 | 0.005603 |
| R12B2.5    | mdt-15     | chrIII | -0.248000 | 0.005954 |
| C10G11.7   | C10G11.7   | chrI   | -0.248111 | 0.005482 |
| C14A4.4    | cm-3       | chrII  | -0.248511 | 0.005845 |
| F46B6.5    | F46B6.5    | chrV   | -0.248522 | 0.005902 |
| W04G3.8    | lpr-3      | chrX   | -0.248743 | 0.011918 |
| F32A6.3    | vps-41     | chrX   | -0.248764 | 0.015936 |
| K02E10.2   | hid-1      | chrX   | -0.248806 | 0.010776 |
| C28A5.4    | ceh-43     | chrIII | -0.248989 | 0.020912 |
| C49C3.4    | C49C3.4    | chrIV  | -0.249370 | 0.006339 |
| B0302.1    | kin-25     | chrX   | -0.249399 | 0.008444 |
| F20D6.11   | F20D6.11   | chrV   | -0.249458 | 0.020041 |
| F13E9.11   | F13E9.11   | chrIV  | -0.249749 | 0.011076 |
| R144.2     | pcf-11     | chrIII | -0.249859 | 0.005993 |
| K03H1.5    | K03H1.5    | chrIII | -0.250634 | 0.031408 |
| Y65B4BR.3  | ptr-21     | chrI   | -0.250656 | 0.009999 |
| R11E3.8    | dpf-5      | chrIV  | -0.250776 | 0.005234 |
| F49E12.6   | F49E12.6   | chrII  | -0.251043 | 0.011707 |
| F18E2.3    | scc-3      | chrV   | -0.251624 | 0.005100 |
| W03G11.4   | W03G11.4   | chrX   | -0.251665 | 0.014977 |
| K04H4.1    | emb-9      | chrIII | -0.251752 | 0.004801 |
| F26G1.1    | F26G1.1    | chrII  | -0.252010 | 0.005892 |
| T09E8.1    | T09E8.1    | chrV   | -0.252336 | 0.004869 |
| F23D12.5   | F23D12.5   | chrX   | -0.252358 | 0.030231 |
| D2005.5    | drh-3      | chrI   | -0.252617 | 0.005368 |
| R09A8.3    | tag-147    | chrX   | -0.252982 | 0.005357 |
| F10C2.4    | F10C2.4    | chrV   | -0.253045 | 0.004919 |
| Y45G12B.1  | nuo-5      | chrV   | -0.253148 | 0.004823 |
| Y106G6D.7  | Y106G6D.7  | chrI   | -0.253171 | 0.005539 |
| Y55F3AM.15 | csn-4      | chrIV  | -0.253320 | 0.006068 |
| T19D12.4   | T19D12.4   | chrII  | -0.253620 | 0.011886 |
| C04E6.11   | C04E6.11   | chrV   | -0.253812 | 0.005990 |
| M01G12.12  | rrf-2      | chrI   | -0.253854 | 0.042253 |
| Y51A2D.7   | Y51A2D.7   | chrV   | -0.253878 | 0.009147 |
| T10F2.1    | gars-1     | chrIII | -0.254101 | 0.004604 |
| C09D8.1    | ptp-3      | chrII  | -0.254178 | 0.005452 |
| T23H2.1    | npp-12     | chrI   | -0.254487 | 0.004532 |
| ZK662.4    | lin-15B    | chrX   | -0.254925 | 0.006231 |
| Y82E9BR.18 | Y82E9BR.18 | chrIII | -0.254933 | 0.006026 |
| C07A9.3    | tlk-1      | chrIII | -0.255114 | 0.004186 |
| F26H11.2   | nurf-1     | chrII  | -0.255305 | 0.004300 |
| K01A6.2    | magi-1     | chrIV  | -0.255352 | 0.005928 |
| C42C1.11   | C42C1.11   | chrIV  | -0.255374 | 0.005540 |
| F32H2.1    | gei-11     | chrI   | -0.255437 | 0.004747 |
| F10G7.1    | tag-151    | chrII  | -0.255481 | 0.004678 |
| F21G4.6    | F21G4.6    | chrX   | -0.256138 | 0.010902 |
| D1007.15   | D1007.15   | chrI   | -0.256386 | 0.012733 |
| W06B4.3    | vps-18     | chrII  | -0.256486 | 0.006529 |
| T23B12.4   | T23B12.4   | chrV   | -0.256584 | 0.004317 |
| Y110A7A.1  | hcp-6      | chrI   | -0.256747 | 0.004261 |
| VW02B12L.1 | vha-6      | chrII  | -0.256843 | 0.004152 |
| Y39A3CL.7  | Y39A3CL.7  | chrIII | -0.256874 | 0.005732 |
| F37D6.1    | mus-101    | chrI   | -0.257286 | 0.004639 |
| C01B10.5   | hil-7      | chrIV  | -0.257559 | 0.011500 |
| F46C8.6    | dpy-7      | chrX   | -0.257765 | 0.016433 |
| T12G3.4    | T12G3.4    | chrIV  | -0.257811 | 0.014228 |
| F23H11.2   | F23H11.2   | chrIII | -0.257981 | 0.005832 |
| Y48A6C.5   | pha-1      | chrIII | -0.258056 | 0.018385 |
| M03A8.2    | atg-2      | chrX   | -0.258060 | 0.005485 |
| F32B4.4    | F32B4.4    | chrI   | -0.258544 | 0.006083 |
| T27B1.2    | ztf-19     | chrX   | -0.258981 | 0.016333 |

|             |           |        |           |          |
|-------------|-----------|--------|-----------|----------|
| Y39H10A.6   | Y39H10A.6 | chrV   | -0.259006 | 0.012252 |
| F53F4.11    | F53F4.11  | chrV   | -0.259918 | 0.003842 |
| F18E9.5     | tag-279   | chrX   | -0.260089 | 0.009467 |
| F01G4.3     | F01G4.3   | chrIV  | -0.260173 | 0.004240 |
| F02E8.4     | F02E8.4   | chrX   | -0.260344 | 0.004299 |
| Y73B6BL.18  | smg-3     | chrIV  | -0.260352 | 0.004116 |
| F33G12.6    | F33G12.6  | chrII  | -0.260404 | 0.012383 |
| F20C5.2     | klp-11    | chrIV  | -0.260429 | 0.017866 |
| T13F2.3     | pis-1     | chrIV  | -0.260590 | 0.004240 |
| F20B10.1    | nlr-1     | chrIV  | -0.260752 | 0.014640 |
| T21B6.1     | dgn-1     | chrX   | -0.260781 | 0.005494 |
| K10D2.1     | K10D2.1   | chrIII | -0.260862 | 0.004178 |
| F33C8.1     | tag-53    | chrX   | -0.260880 | 0.004934 |
| F31E3.5     | eef-1A.1  | chrIII | -0.260971 | 0.003115 |
| R13A1.2     | kcc-1     | chrIV  | -0.261230 | 0.003958 |
| T02E9.5     | T02E9.5   | chrV   | -0.261808 | 0.005548 |
| ZK337.1     | tep-1     | chrI   | -0.261905 | 0.005358 |
| B0464.4     | bre-3     | chrIII | -0.262014 | 0.004358 |
| ZC376.2     | ZC376.2   | chrV   | -0.262035 | 0.013859 |
| T24C4.2     | T24C4.2   | chrIII | -0.262302 | 0.013710 |
| H06O01.2    | H06O01.2  | chrI   | -0.262321 | 0.004057 |
| ZK520.4     | cul-2     | chrIII | -0.262344 | 0.003300 |
| C54G7.3     | lgx-1     | chrX   | -0.262510 | 0.042160 |
| C47E8.8     | set-5     | chrV   | -0.262538 | 0.004956 |
| F52C9.8     | pqe-1     | chrIII | -0.262620 | 0.003245 |
| F47A4.2     | dpy-22    | chrX   | -0.263570 | 0.003612 |
| Y59A8B.6    | Y59A8B.6  | chrV   | -0.263623 | 0.003414 |
| T20B12.6    | mml-1     | chrIII | -0.263952 | 0.005848 |
| F11A6.1     | kpc-1     | chrI   | -0.264154 | 0.008059 |
| T04G9.1     | T04G9.1   | chrX   | -0.264405 | 0.009285 |
| ZC477.9     | deb-1     | chrIV  | -0.264425 | 0.003696 |
| C14H10.3    | C14H10.3  | chrX   | -0.264805 | 0.008009 |
| M79.1       | abl-1     | chrX   | -0.265112 | 0.004812 |
| F16D3.2     | rsd-6     | chrI   | -0.266073 | 0.003033 |
| C23G10.8    | C23G10.8  | chrIII | -0.266074 | 0.002977 |
| K07C5.8     | cash-1    | chrV   | -0.266452 | 0.002769 |
| C35E7.5     | C35E7.5   | chrI   | -0.266895 | 0.003169 |
| C08H9.2     | C08H9.2   | chrII  | -0.267143 | 0.002479 |
| T21C9.2     | vps-54    | chrV   | -0.267308 | 0.003290 |
| T12F5.4     | lin-59    | chrI   | -0.267653 | 0.003208 |
| F08B4.6     | hst-1     | chrIV  | -0.267669 | 0.003623 |
| T19A5.1     | T19A5.1   | chrV   | -0.267693 | 0.002790 |
| E04D5.1     | E04D5.1   | chrII  | -0.267816 | 0.002552 |
| Y39A1C.2    | oxi-1     | chrIII | -0.267968 | 0.003467 |
| F36H1.2     | tag-144   | chrIV  | -0.267977 | 0.002935 |
| F13D2.1     | F13D2.1   | chrX   | -0.268265 | 0.021526 |
| Y32B12B.4   | Y32B12B.4 | chrV   | -0.268355 | 0.003462 |
| R06F6.2     | vps-11    | chrII  | -0.268401 | 0.003667 |
| C27H2.2     | C27H2.2   | chrIV  | -0.268435 | 0.013130 |
| C29F3.7     | C29F3.7   | chrV   | -0.268733 | 0.004332 |
| F25B5.1     | dct-6     | chrIII | -0.268892 | 0.004694 |
| F22B8.4     | F22B8.4   | chrV   | -0.269312 | 0.036875 |
| Y41D4A.5    | Y41D4A.5  | chrIV  | -0.269392 | 0.003031 |
| F56D12.6    | F56D12.6  | chrII  | -0.269558 | 0.002953 |
| F55C7.7     | unc-73    | chrI   | -0.269565 | 0.003193 |
| B0416.1     | B0416.1   | chrX   | -0.269838 | 0.025071 |
| F11C3.3     | unc-54    | chrI   | -0.269859 | 0.002207 |
| K10C3.4     | K10C3.4   | chrI   | -0.269910 | 0.002993 |
| Y39G10AR.10 | epg-2     | chrI   | -0.269994 | 0.002793 |
| T05E11.3    | T05E11.3  | chrIV  | -0.270033 | 0.002251 |
| F44B9.6     | lin-36    | chrIII | -0.270112 | 0.002555 |
| C54C6.2     | ben-1     | chrIII | -0.270112 | 0.004099 |
| R09H10.5    | R09H10.5  | chrIV  | -0.270480 | 0.002870 |

|            |            |        |           |          |
|------------|------------|--------|-----------|----------|
| T21B10.3   | T21B10.3   | chrII  | -0.270731 | 0.002402 |
| T26A5.2    | T26A5.2    | chrIII | -0.270924 | 0.003305 |
| F29D10.4   | hum-1      | chrI   | -0.271350 | 0.002655 |
| B0523.5    | fli-1      | chrIII | -0.271631 | 0.002575 |
| T22F3.3    | T22F3.3    | chrV   | -0.272013 | 0.002051 |
| F20D12.4   | czw-1      | chrIV  | -0.272106 | 0.002287 |
| F43G9.12   | F43G9.12   | chrI   | -0.272162 | 0.002881 |
| F12F6.1    | F12F6.1    | chrIV  | -0.272431 | 0.002284 |
| W03C9.2    | W03C9.2    | chrII  | -0.272580 | 0.011276 |
| Y49E10.21  | Y49E10.21  | chrIII | -0.273020 | 0.004132 |
| R03G5.1    | eef-1A.2   | chrX   | -0.273272 | 0.002046 |
| C33F10.4   | C33F10.4   | chrII  | -0.273282 | 0.017835 |
| Y46G5A.1   | tbc-17     | chrII  | -0.273388 | 0.003203 |
| B0024.10   | B0024.10   | chrV   | -0.273810 | 0.002967 |
| C04H5.6    | mog-4      | chrII  | -0.273982 | 0.002529 |
| C36A4.8    | brc-1      | chrIII | -0.274105 | 0.003841 |
| ZK512.5    | sec-16     | chrIII | -0.274208 | 0.002179 |
| C37H5.5    | C37H5.5    | chrV   | -0.274308 | 0.002653 |
| W02B12.1   | W02B12.1   | chrII  | -0.274437 | 0.008109 |
| ZK856.13   | tag-315    | chrV   | -0.274699 | 0.002271 |
| Y119C1B.8  | bet-1      | chrI   | -0.274778 | 0.002183 |
| Y59A8B.23  | gck-3      | chrV   | -0.275303 | 0.002720 |
| T08B2.7    | T08B2.7    | chrI   | -0.275482 | 0.001875 |
| C29E4.4    | npp-15     | chrIII | -0.275760 | 0.002111 |
| Y49E10.11  | tat-1      | chrIII | -0.275827 | 0.002190 |
| K03H1.11   | K03H1.11   | chrIII | -0.275835 | 0.008801 |
| F47F6.1    | lin-42     | chrII  | -0.275879 | 0.019188 |
| Y48G1A.4   | Y48G1A.4   | chrI   | -0.276009 | 0.003247 |
| F59F3.1    | ver-3      | chrX   | -0.276126 | 0.003479 |
| W03F11.6   | afd-1      | chrI   | -0.276681 | 0.002417 |
| Y92H12BR.3 | Y92H12BR.3 | chrI   | -0.277047 | 0.001905 |
| F08G12.1   | F08G12.1   | chrX   | -0.277472 | 0.010292 |
| C01B7.6    | rpm-1      | chrV   | -0.277506 | 0.005651 |
| Y51H4A.12  | set-26     | chrIV  | -0.277570 | 0.005740 |
| W10C6.1    | mat-2      | chrII  | -0.277578 | 0.001859 |
| Y39E4B.7   | Y39E4B.7   | chrIII | -0.277656 | 0.003533 |
| F14F4.3    | mrp-5      | chrX   | -0.278021 | 0.002099 |
| F49E7.1    | rme-6      | chrX   | -0.278103 | 0.004152 |
| B0414.6    | glh-3      | chrI   | -0.278506 | 0.002519 |
| Y79H2A.3   | Y79H2A.3   | chrIII | -0.278725 | 0.002085 |
| T01H10.8   | T01H10.8   | chrX   | -0.278856 | 0.009333 |
| C44F1.1    | C44F1.1    | chrIII | -0.278928 | 0.034995 |
| Y56A3A.1   | ntl-3      | chrIII | -0.279355 | 0.001841 |
| C16H3.3    | C16H3.3    | chrX   | -0.279383 | 0.006047 |
| T05A7.11   | T05A7.11   | chrII  | -0.279617 | 0.038430 |
| Y71H2AM.17 | Y71H2AM.17 | chrIII | -0.279670 | 0.002515 |
| F46G10.5   | ptr-24     | chrX   | -0.280283 | 0.002779 |
| F20B6.3    | mrp-6      | chrX   | -0.280445 | 0.009889 |
| K04B12.3   | smg-8      | chrII  | -0.280884 | 0.002462 |
| C15H9.4    | C15H9.4    | chrX   | -0.281361 | 0.003055 |
| D2045.1    | atx-2      | chrIII | -0.281483 | 0.001524 |
| C34E11.3   | tag-241    | chrX   | -0.281589 | 0.006163 |
| F33D4.2    | itr-1      | chrIV  | -0.281724 | 0.001903 |
| M01E11.7   | tag-163    | chrI   | -0.281805 | 0.002863 |
| H26D21.2   | msh-2      | chrI   | -0.281818 | 0.001711 |
| Y110A7A.9  | Y110A7A.9  | chrI   | -0.282180 | 0.001664 |
| F36D4.3    | hum-2      | chrV   | -0.282399 | 0.001487 |
| F54D5.14   | smc-6      | chrII  | -0.282426 | 0.001433 |
| W02A2.6    | rec-8      | chrIV  | -0.282736 | 0.001903 |
| F44A2.1    | tag-153    | chrV   | -0.283043 | 0.001477 |
| C47G2.5    | saps-1     | chrII  | -0.283131 | 0.001489 |
| C06E1.10   | rha-2      | chrIII | -0.283239 | 0.003370 |
| Y106G6H.2  | pab-1      | chrI   | -0.283337 | 0.001242 |



|            |            |        |           |          |
|------------|------------|--------|-----------|----------|
| T22C1.10   | rbg-2      | chrI   | -0.283372 | 0.001782 |
| B0218.3    | pmk-1      | chrIV  | -0.283548 | 0.004930 |
| F17C11.10  | F17C11.10  | chrV   | -0.283571 | 0.001379 |
| C27A2.1    | smc-5      | chrII  | -0.283616 | 0.001412 |
| T14B4.7    | dpy-10     | chrII  | -0.283703 | 0.003185 |
| W09G3.6    | W09G3.6    | chrI   | -0.283812 | 0.001751 |
| R10E4.4    | mcm-5      | chrIII | -0.284100 | 0.001314 |
| Y54E10BL.6 | mek-2      | chrI   | -0.284136 | 0.002359 |
| F56A3.3    | npp-6      | chrI   | -0.284489 | 0.001364 |
| C07D10.5   | C07D10.5   | chrII  | -0.284711 | 0.004058 |
| B0464.6    | B0464.6    | chrIII | -0.284803 | 0.001408 |
| T11F8.3    | rme-2      | chrIV  | -0.285116 | 0.001166 |
| T19B4.2    | npp-7      | chrI   | -0.285449 | 0.001208 |
| F55B11.1   | F55B11.1   | chrIV  | -0.285535 | 0.004179 |
| C07E3.1    | stip-1     | chrII  | -0.285726 | 0.001595 |
| F52B10.1   | nmy-1      | chrX   | -0.285891 | 0.001267 |
| W07A8.2    | W07A8.2    | chrV   | -0.285917 | 0.001460 |
| F23B2.11   | pcp-3      | chrIV  | -0.286285 | 0.002170 |
| M106.2     | M106.2     | chrII  | -0.286296 | 0.001835 |
| K08F4.2    | K08F4.2    | chrIV  | -0.286426 | 0.001167 |
| Y48G1A.5   | xpo-2      | chrI   | -0.286493 | 0.001225 |
| F55A3.1    | marc-6     | chrI   | -0.286680 | 0.001363 |
| Y110A7A.16 | elpc-1     | chrI   | -0.286768 | 0.001371 |
| K08E7.9    | pgp-1      | chrIV  | -0.286790 | 0.003936 |
| Y56A3A.12  | faah-4     | chrIII | -0.287323 | 0.001942 |
| F35E12.5   | F35E12.5   | chrV   | -0.287748 | 0.006531 |
| Y48G1C.11  | Y48G1C.11  | chrI   | -0.288112 | 0.003387 |
| Y47D3B.7   | sbp-1      | chrIII | -0.288237 | 0.003253 |
| F28B3.1    | F28B3.1    | chrI   | -0.288682 | 0.001367 |
| C29F3.1    | ech-1      | chrV   | -0.288745 | 0.016242 |
| C02F5.1    | knI-1      | chrIII | -0.288762 | 0.001163 |
| F19B6.1    | F19B6.1    | chrIV  | -0.289599 | 0.001125 |
| F02C12.1   | F02C12.1   | chrX   | -0.290241 | 0.012070 |
| F13B12.6   | F13B12.6   | chrIV  | -0.290277 | 0.001250 |
| T21G5.3    | glh-1      | chrI   | -0.290398 | 0.000992 |
| T08H4.1    | rhgf-2     | chrII  | -0.291316 | 0.005115 |
| ZK1098.3   | ZK1098.3   | chrIII | -0.292245 | 0.008246 |
| C44H4.3    | sym-1      | chrX   | -0.292322 | 0.001596 |
| Y45F10A.6  | tbc-9      | chrIV  | -0.292851 | 0.001062 |
| Y23H5B.5   | Y23H5B.5   | chrI   | -0.292979 | 0.001252 |
| F37B4.7    | folT-2     | chrV   | -0.293266 | 0.000876 |
| Y75B8A.22  | tim-1      | chrIII | -0.293697 | 0.000943 |
| K07C6.5    | cyp-35A5   | chrV   | -0.293937 | 0.008449 |
| T19B10.5   | T19B10.5   | chrV   | -0.294064 | 0.005427 |
| K11G9.4    | egl-46     | chrV   | -0.294118 | 0.003876 |
| Y59H11AR.2 | catp-7     | chrIV  | -0.294542 | 0.001657 |
| F56A3.4    | spd-5      | chrI   | -0.294899 | 0.000793 |
| B0285.7    | mnp-1      | chrIII | -0.294935 | 0.002088 |
| Y52B11A.10 | Y52B11A.10 | chrI   | -0.294996 | 0.001893 |
| R08E3.1    | R08E3.1    | chrX   | -0.295009 | 0.001314 |
| F14E5.2    | F14E5.2    | chrII  | -0.295065 | 0.000839 |
| F15B10.2   | drh-1      | chrIV  | -0.295105 | 0.001376 |
| T14E8.1    | T14E8.1    | chrX   | -0.295574 | 0.001838 |
| T24C4.6    | zer-1      | chrIII | -0.295682 | 0.000838 |
| C25A11.4   | ajm-1      | chrX   | -0.295749 | 0.001046 |
| Y18D10A.1  | Y18D10A.1  | chrI   | -0.295766 | 0.001121 |
| T22H6.2    | alh-13     | chrX   | -0.296003 | 0.001799 |
| C14B4.2    | C14B4.2    | chrV   | -0.296171 | 0.005456 |
| W04D2.1    | atn-1      | chrV   | -0.296456 | 0.000878 |
| F49D11.10  | F49D11.10  | chrI   | -0.296743 | 0.002608 |
| Y76A2A.2   | cua-1      | chrIII | -0.296797 | 0.000905 |
| Y119D3B.14 | Y119D3B.14 | chrIII | -0.296931 | 0.001762 |
| F54B3.3    | atad-3     | chrII  | -0.297431 | 0.000833 |

|            |            |        |           |          |
|------------|------------|--------|-----------|----------|
| F11D5.3    | ddr-2      | chrX   | -0.297455 | 0.007178 |
| ZC101.2    | unc-52     | chrII  | -0.297559 | 0.000757 |
| R13F6.10   | cra-1      | chrIII | -0.297628 | 0.000819 |
| F10B5.7    | rrf-3      | chrII  | -0.298585 | 0.000888 |
| C34F6.10   | C34F6.10   | chrX   | -0.298599 | 0.001899 |
| Y41D4B.21  | nhr-274    | chrIV  | -0.298670 | 0.002145 |
| ZK945.3    | puf-12     | chrII  | -0.298912 | 0.000726 |
| F28H1.3    | aars-2     | chrI   | -0.298935 | 0.000667 |
| C04G2.6    | dis-3      | chrIV  | -0.299044 | 0.000796 |
| Y55F3AM.6  | Y55F3AM.6  | chrIV  | -0.299185 | 0.002100 |
| B0365.3    | eat-6      | chrV   | -0.299204 | 0.000616 |
| W02B8.2    | W02B8.2    | chrII  | -0.299278 | 0.001245 |
| F40F12.5   | cyld-1     | chrIII | -0.299745 | 0.000707 |
| C49H3.10   | xpo-3      | chrIV  | -0.299977 | 0.000738 |
| F07A11.6   | din-1      | chrII  | -0.300124 | 0.000790 |
| K04D7.5    | gon-4      | chrIV  | -0.300652 | 0.000741 |
| F32F2.1    | uig-1      | chrV   | -0.301416 | 0.004750 |
| F26E4.10   | drsh-1     | chrI   | -0.301700 | 0.000739 |
| W04A8.4    | W04A8.4    | chrI   | -0.301756 | 0.001595 |
| F11D5.1    | F11D5.1    | chrX   | -0.301790 | 0.006070 |
| Y71F9B.10  | sop-3      | chrI   | -0.301887 | 0.000740 |
| Y47D3A.6   | tra-1      | chrIII | -0.301941 | 0.002692 |
| F52C9.1    | F52C9.1    | chrIII | -0.302450 | 0.001613 |
| F14B8.5    | F14B8.5    | chrX   | -0.302542 | 0.008292 |
| H28G03.6   | mtm-5      | chrX   | -0.302567 | 0.001667 |
| Y71A12B.9  | usp-3      | chrI   | -0.302874 | 0.004426 |
| Y113G7B.23 | psa-1      | chrV   | -0.302948 | 0.000761 |
| D2021.1    | utx-1      | chrX   | -0.303136 | 0.001267 |
| F56D1.4    | clr-1      | chrII  | -0.303387 | 0.000609 |
| F27D4.2    | lsy-22     | chrI   | -0.303469 | 0.000815 |
| C14C10.4   | C14C10.4   | chrV   | -0.303645 | 0.000614 |
| F39H11.2   | tlf-1      | chrI   | -0.303713 | 0.000793 |
| F42A9.2    | lin-49     | chrIV  | -0.303808 | 0.000699 |
| Y64G10A.7  | Y64G10A.7  | chrIV  | -0.303821 | 0.009368 |
| Y25C1A.5   | Y25C1A.5   | chrII  | -0.304050 | 0.000579 |
| Y37E3.17   | Y37E3.17   | chrI   | -0.304063 | 0.000579 |
| Y110A7A.19 | Y110A7A.19 | chrI   | -0.304112 | 0.000971 |
| C55B7.1    | glh-2      | chrI   | -0.304389 | 0.000610 |
| F33E11.6   | F33E11.6   | chrV   | -0.304585 | 0.001277 |
| ZC518.2    | sec-24.2   | chrIV  | -0.304720 | 0.000691 |
| F39G3.3    | F39G3.3    | chrV   | -0.305107 | 0.001599 |
| C07G2.3    | cct-5      | chrIII | -0.305553 | 0.000479 |
| F54B11.3   | unc-84     | chrX   | -0.305806 | 0.000663 |
| C18C4.3    | ugt-48     | chrV   | -0.305822 | 0.017209 |
| Y71H2B.10  | apb-1      | chrIII | -0.306205 | 0.000606 |
| ZK370.3    | hipr-1     | chrIII | -0.306448 | 0.000586 |
| D1022.7    | aka-1      | chrII  | -0.306775 | 0.000479 |
| F59A3.3    | F59A3.3    | chrI   | -0.307111 | 0.002860 |
| Y55F3AR.2  | Y55F3AR.2  | chrIV  | -0.307532 | 0.001347 |
| C16A3.7    | tag-182    | chrIII | -0.307546 | 0.000471 |
| Y73B6BL.6  | sqd-1      | chrIV  | -0.307688 | 0.000423 |
| C06G1.4    | ain-1      | chrX   | -0.307976 | 0.000551 |
| W04G3.3    | lpr-4      | chrX   | -0.308098 | 0.013266 |
| C18C4.5    | C18C4.5    | chrV   | -0.308296 | 0.001134 |
| B0457.1    | lat-1      | chrII  | -0.308822 | 0.000459 |
| F11A10.1   | lex-1      | chrIV  | -0.309011 | 0.000432 |
| R06A4.2    | R06A4.2    | chrII  | -0.309127 | 0.000725 |
| C06A1.1    | cdc-48.1   | chrII  | -0.309288 | 0.000388 |
| Y38E10A.22 | Y38E10A.22 | chrII  | -0.309558 | 0.000788 |
| B0365.1    | B0365.1    | chrV   | -0.309721 | 0.000422 |
| T01G1.1    | klp-12     | chrIV  | -0.309809 | 0.000455 |
| W06D4.6    | rad-54     | chrI   | -0.310166 | 0.000757 |
| W07E6.1    | nol-1      | chrII  | -0.310206 | 0.000508 |

|            |           |        |           |          |
|------------|-----------|--------|-----------|----------|
| C48B4.1    | C48B4.1   | chrIII | -0.310440 | 0.000695 |
| ZK328.5    | npp-10    | chrIII | -0.310816 | 0.000379 |
| ZK1151.1   | vab-10    | chrI   | -0.310989 | 0.000386 |
| Y71H2B.5   | Y71H2B.5  | chrIII | -0.311849 | 0.001031 |
| ZK675.1    | ptc-1     | chrII  | -0.312059 | 0.000356 |
| Y67A10A.9  | Y67A10A.9 | chrIV  | -0.312456 | 0.011510 |
| M106.1     | mix-1     | chrII  | -0.312659 | 0.000400 |
| W09B6.1    | pod-2     | chrII  | -0.312729 | 0.000352 |
| C06G3.6    | C06G3.6   | chrIV  | -0.313499 | 0.001057 |
| R03E9.2    | R03E9.2   | chrX   | -0.313585 | 0.011185 |
| D2013.5    | eat-3     | chrII  | -0.313712 | 0.000394 |
| T09B4.5    | T09B4.5   | chrI   | -0.313743 | 0.000489 |
| R03H10.2   | R03H10.2  | chrII  | -0.314363 | 0.009956 |
| B0412.3    | B0412.3   | chrIII | -0.314550 | 0.000445 |
| Y67D8A.1   | Y67D8A.1  | chrIV  | -0.314648 | 0.000489 |
| C04H5.1    | C04H5.1   | chrII  | -0.314749 | 0.002088 |
| R10E4.11   | R10E4.11  | chrIII | -0.314813 | 0.000698 |
| T06E4.1    | hcp-2     | chrV   | -0.315451 | 0.000334 |
| F15D4.1    | btf-1     | chrII  | -0.315460 | 0.000427 |
| Y51H7C.6   | cogc-4    | chrII  | -0.315487 | 0.000419 |
| C44B7.8    | pmp-1     | chrII  | -0.315557 | 0.001039 |
| ZK1248.3   | ehs-1     | chrII  | -0.316145 | 0.000409 |
| Y54F10BM.2 | iffb-1    | chrIII | -0.316484 | 0.000328 |
| K09H11.3   | rga-3     | chrV   | -0.316550 | 0.000354 |
| D1043.1    | D1043.1   | chrII  | -0.316892 | 0.000398 |
| C37A2.5    | pqn-21    | chrI   | -0.316945 | 0.000645 |
| F46C3.3    | hum-4     | chrX   | -0.317034 | 0.000694 |
| B0511.12   | B0511.12  | chrI   | -0.317036 | 0.000329 |
| F18C5.2    | wrn-1     | chrII  | -0.317144 | 0.000464 |
| Y105E8A.26 | zoo-1     | chrI   | -0.317366 | 0.000956 |
| B0041.7    | xnp-1     | chrI   | -0.317517 | 0.000325 |
| T23D8.4    | eif-3.C   | chrI   | -0.317871 | 0.000273 |
| R05F9.12   | aagr-2    | chrII  | -0.318112 | 0.000290 |
| ZK930.1    | ZK930.1   | chrII  | -0.318242 | 0.000354 |
| Y48B6A.3   | xrn-2     | chrII  | -0.318314 | 0.000381 |
| ZK1055.1   | hcp-1     | chrV   | -0.318668 | 0.000263 |
| R05H10.5   | R05H10.5  | chrII  | -0.318811 | 0.000454 |
| F47A4.3    | rrc-1     | chrX   | -0.319429 | 0.016544 |
| T05H10.7   | T05H10.7  | chrII  | -0.319565 | 0.000330 |
| F22D3.2    | F22D3.2   | chrII  | -0.319875 | 0.000358 |
| F53F10.2   | F53F10.2  | chrI   | -0.320494 | 0.000269 |
| ZK1236.3   | sor-1     | chrIII | -0.320649 | 0.000522 |
| C35C5.6    | C35C5.6   | chrX   | -0.320658 | 0.000877 |
| ZK783.4    | flt-1     | chrIII | -0.320697 | 0.000396 |
| C35E7.6    | C35E7.6   | chrI   | -0.320756 | 0.001778 |
| T23D8.1    | mom-5     | chrI   | -0.321123 | 0.000268 |
| Y37E3.10   | Y37E3.10  | chrI   | -0.321221 | 0.000259 |
| Y53F4B.42  | Y53F4B.42 | chrII  | -0.321271 | 0.006767 |
| F55A12.8   | F55A12.8  | chrI   | -0.321439 | 0.000353 |
| F01G12.5   | let-2     | chrX   | -0.322100 | 0.000218 |
| F46H5.4    | F46H5.4   | chrX   | -0.322148 | 0.000476 |
| F28B3.7    | him-1     | chrI   | -0.322487 | 0.000227 |
| C18E3.7    | ppw-1     | chrI   | -0.322740 | 0.004734 |
| F55F10.1   | F55F10.1  | chrIV  | -0.322779 | 0.000266 |
| C14B1.7    | C14B1.7   | chrIII | -0.322941 | 0.000297 |
| F01F1.8    | cct-6     | chrIII | -0.323033 | 0.000223 |
| K12H4.1    | ceh-26    | chrIII | -0.323164 | 0.008333 |
| K02C4.4    | ltd-1     | chrII  | -0.323167 | 0.008260 |
| B0035.12   | B0035.12  | chrIV  | -0.323338 | 0.000248 |
| T01G9.3    | T01G9.3   | chrI   | -0.323672 | 0.013387 |
| F54C9.1    | iff-2     | chrII  | -0.323739 | 0.000229 |
| Y76A2B.1   | pod-1     | chrIII | -0.323936 | 0.000205 |
| Y71H10A.2  | Y71H10A.2 | chrX   | -0.323974 | 0.000414 |

|            |            |        |           |          |
|------------|------------|--------|-----------|----------|
| C43C3.3    | dyf-7      | chrX   | -0.324141 | 0.010925 |
| K07G5.1    | crml-1     | chrI   | -0.324175 | 0.000220 |
| Y57A10A.15 | polg-1     | chrII  | -0.324287 | 0.000915 |
| F07A11.2   | F07A11.2   | chrII  | -0.324381 | 0.000198 |
| Y17G7B.5   | mcm-2      | chrII  | -0.324680 | 0.000203 |
| F52E10.1   | sdc-1      | chrX   | -0.324763 | 0.000610 |
| R06F6.8    | R06F6.8    | chrII  | -0.324813 | 0.000257 |
| ZC376.6    | ZC376.6    | chrV   | -0.325588 | 0.000270 |
| Y37E11B.5  | Y37E11B.5  | chrIV  | -0.325852 | 0.000819 |
| F10G7.10   | F10G7.10   | chrII  | -0.326276 | 0.000287 |
| Y32F6A.3   | pap-1      | chrV   | -0.326395 | 0.000213 |
| Y6B3A.1    | agef-1     | chrI   | -0.326451 | 0.000259 |
| Y42H9B.2   | rig-4      | chrIV  | -0.326788 | 0.000220 |
| D2023.2    | pyc-1      | chrV   | -0.326833 | 0.000181 |
| C48B4.4    | ced-7      | chrIII | -0.326917 | 0.000195 |
| C42C1.4    | C42C1.4    | chrIV  | -0.327060 | 0.000281 |
| B0272.1    | tbb-4      | chrX   | -0.327346 | 0.017688 |
| B0464.5    | spk-1      | chrIII | -0.327419 | 0.000177 |
| K07H8.10   | K07H8.10   | chrIV  | -0.327476 | 0.000162 |
| F10E9.6    | mig-10     | chrIII | -0.327946 | 0.000568 |
| AC3.7      | ugt-1      | chrV   | -0.328069 | 0.004240 |
| F54D12.5   | F54D12.5   | chrII  | -0.328145 | 0.000485 |
| T07D4.4    | ddx-19     | chrII  | -0.328327 | 0.000190 |
| Y46G5A.4   | Y46G5A.4   | chrII  | -0.328452 | 0.000174 |
| C42D8.8    | apl-1      | chrX   | -0.328673 | 0.000185 |
| F41G3.12   | agr-1      | chrII  | -0.328903 | 0.004456 |
| M02B7.4    | M02B7.4    | chrIV  | -0.329080 | 0.001005 |
| F37A4.8    | isw-1      | chrIII | -0.329288 | 0.000167 |
| C45G3.1    | aspm-1     | chrI   | -0.329536 | 0.000196 |
| C05C10.6   | ufd-3      | chrII  | -0.329709 | 0.000160 |
| Y16B4A.2   | Y16B4A.2   | chrX   | -0.329867 | 0.000217 |
| ZK593.5    | dnc-1      | chrIV  | -0.330393 | 0.000179 |
| F09E10.3   | dhs-25     | chrX   | -0.330472 | 0.000201 |
| M18.5      | ddb-1      | chrIV  | -0.330571 | 0.000194 |
| B0285.1    | cdtl-7     | chrIII | -0.330890 | 0.000208 |
| B0198.3    | B0198.3    | chrX   | -0.331202 | 0.012440 |
| F57C7.1    | bet-2      | chrX   | -0.331252 | 0.000208 |
| Y18D10A.13 | pad-1      | chrI   | -0.331377 | 0.000191 |
| Y79H2A.11  | zyg-8      | chrIII | -0.331648 | 0.000292 |
| R119.4     | pqn-59     | chrI   | -0.331650 | 0.000133 |
| H43E16.1   | H43E16.1   | chrII  | -0.332684 | 0.004847 |
| C47E12.7   | C47E12.7   | chrIV  | -0.333022 | 0.001314 |
| D1037.2    | smp-2      | chrI   | -0.333230 | 0.000653 |
| C27B7.7    | C27B7.7    | chrIV  | -0.333270 | 0.009144 |
| F54D1.6    | F54D1.6    | chrIV  | -0.333427 | 0.000556 |
| Y20F4.2    | Y20F4.2    | chrI   | -0.333432 | 0.004655 |
| F48E3.3    | F48E3.3    | chrX   | -0.333951 | 0.000162 |
| R11A5.4    | R11A5.4    | chrI   | -0.334082 | 0.000118 |
| F52G3.1    | F52G3.1    | chrX   | -0.334127 | 0.000224 |
| Y39A1A.15  | cnt-2      | chrIII | -0.334474 | 0.000197 |
| Y18D10A.3  | Y18D10A.3  | chrI   | -0.335014 | 0.011753 |
| Y41E3.11   | Y41E3.11   | chrIV  | -0.335148 | 0.000125 |
| C44B9.1    | C44B9.1    | chrIII | -0.335196 | F.000988 |
| D1007.7    | nrd-1      | chrI   | -0.335368 | 0.000152 |
| B0222.4    | tag-38     | chrV   | -0.335720 | 0.011020 |
| C46A5.9    | hcf-1      | chrIV  | -0.335849 | 0.000123 |
| T23G5.1    | rnr-1      | chrIII | -0.335851 | 0.000113 |
| B0546.3    | B0546.3    | chrIV  | -0.336203 | 0.001353 |
| F56C9.10   | F56C9.10   | chrIII | -0.336220 | 0.000115 |
| C14F11.6   | C14F11.6   | chrX   | -0.336280 | 0.008172 |
| Y71H2AM.15 | Y71H2AM.15 | chrIII | -0.336434 | 0.007327 |
| C36E8.1    | C36E8.1    | chrIII | -0.337459 | 0.000116 |
| F29C12.3   | rict-1     | chrII  | -0.337687 | 0.000145 |

|             |             |        |           |          |
|-------------|-------------|--------|-----------|----------|
| R06A4.4     | imb-2       | chrII  | -0.338425 | 0.000108 |
| Y39E4B.10   | Y39E4B.10   | chrIII | -0.338491 | 0.000322 |
| Y48G10A.4   | Y48G10A.4   | chrI   | -0.338556 | 0.000259 |
| Y71F9B.6    | Y71F9B.6    | chrI   | -0.338561 | 0.000341 |
| W08D2.7     | mtr-4       | chrIV  | -0.338575 | 0.000129 |
| T01E8.3     | plc-3       | chrII  | -0.338862 | 0.000933 |
| K01C8.10    | cct-4       | chrII  | -0.338909 | 0.000098 |
| F25H8.3     | gon-1       | chrIV  | -0.338999 | 0.000455 |
| Y47H9C.5    | dnj-27      | chrI   | -0.339411 | 0.000315 |
| T17H7.1     | T17H7.1     | chrIII | -0.339474 | 0.014995 |
| K07E12.1    | dig-1       | chrIII | -0.339728 | 0.000194 |
| Y54G11A.10  | lin-7       | chrII  | -0.339775 | 0.000494 |
| R05D3.11    | met-2       | chrIII | -0.339847 | 0.000115 |
| R07C3.11    | fbxc-24     | chrII  | -0.339854 | 0.016317 |
| C52E12.4    | C52E12.4    | chrII  | -0.340086 | 0.000117 |
| R13G10.1    | dpy-27      | chrIII | -0.340184 | 0.000149 |
| C33C12.3    | C33C12.3    | chrII  | -0.340589 | 0.001453 |
| F39B1.1     | piki-1      | chrX   | -0.340965 | 0.000226 |
| T20B5.1     | apa-2       | chrX   | -0.341011 | 0.000165 |
| H02I12.4    | dsl-6       | chrIV  | -0.341444 | 0.026724 |
| W03F9.4     | W03F9.4     | chrV   | -0.341459 | 0.000554 |
| C35E7.4     | C35E7.4     | chrI   | -0.341805 | 0.008866 |
| Y54E2A.11   | eif-3.B     | chrII  | -0.341937 | 0.000091 |
| C24G6.3     | mms-19      | chrV   | -0.342089 | 0.000131 |
| F56F3.1     | pqn-45      | chrIII | -0.342866 | 0.000074 |
| B0228.4     | cpna-2      | chrII  | -0.343320 | 0.000102 |
| C06G3.7     | trxr-1      | chrIV  | -0.343459 | 0.000098 |
| C33B4.3     | shn-1       | chrII  | -0.343701 | 0.000896 |
| C34G6.4     | pgp-2       | chrI   | -0.343723 | 0.000177 |
| F01D4.2     | ugt-44      | chrIV  | -0.343767 | 0.000506 |
| K01G5.6     | rib-2       | chrIII | -0.343778 | 0.000256 |
| C53A3.2     | C53A3.2     | chrV   | -0.343992 | 0.001757 |
| T07D4.3     | rha-1       | chrII  | -0.344145 | 0.000091 |
| F43D9.3     | F43D9.3     | chrIII | -0.344183 | 0.000181 |
| C09F9.3     | glna-1      | chrII  | -0.344283 | 0.014589 |
| T05F1.6     | hsr-9       | chrI   | -0.344346 | 0.000073 |
| F56E3.3     | klp-4       | chrX   | -0.345383 | 0.000248 |
| R01H10.8    | cnk-1       | chrIII | -0.345619 | 0.000122 |
| F18H3.3     | pab-2       | chrX   | -0.345826 | 0.000106 |
| K11H12.4    | K11H12.4    | chrIV  | -0.345834 | 0.020630 |
| F09E5.5     | sec-6       | chrII  | -0.345850 | 0.000121 |
| VF11C1L.1   | ppk-3       | chrX   | -0.346421 | 0.000141 |
| Y104H12A.1  | nhr-41      | chrIV  | -0.346717 | 0.013098 |
| D2045.9     | D2045.9     | chrIII | -0.346829 | 0.001108 |
| W05H9.4     | W05H9.4     | chrX   | -0.346998 | 0.000214 |
| F55H12.3    | F55H12.3    | chrI   | -0.347067 | 0.000719 |
| M88.5       | M88.5       | chrIII | -0.347627 | 0.000071 |
| F42A10.1    | abcf-3      | chrIII | -0.347692 | 0.000073 |
| B0334.8     | age-1       | chrII  | -0.347700 | 0.000086 |
| C38D4.3     | mel-28      | chrIII | -0.348177 | 0.000063 |
| F35D11.11   | dyf-14      | chrII  | -0.348260 | 0.000312 |
| T22C1.1     | T22C1.1     | chrI   | -0.348650 | 0.000089 |
| Y44E3A.6    | Y44E3A.6    | chrI   | -0.348653 | 0.000084 |
| C54G4.8     | cyc-1       | chrI   | -0.348878 | 0.000062 |
| F09F9.4     | F09F9.4     | chrX   | -0.349368 | 0.030410 |
| W04G3.2     | lpr-5       | chrX   | -0.349622 | 0.001550 |
| Y111B2A.8   | aakg-1      | chrIII | -0.349836 | 0.000180 |
| Y39G10AR.18 | Y39G10AR.18 | chrI   | -0.349851 | 0.000086 |
| C09H5.2     | catp-3      | chrV   | -0.350162 | 0.002440 |
| C09H6.2     | lin-10      | chrI   | -0.350235 | 0.000128 |
| Y39A1B.3    | dpy-28      | chrIII | -0.351173 | 0.000072 |
| B0495.7     | B0495.7     | chrII  | -0.351721 | 0.000061 |
| T10C6.7     | T10C6.7     | chrV   | -0.351850 | 0.000318 |

|            |            |        |           |          |
|------------|------------|--------|-----------|----------|
| Y37E3.15   | npp-13     | chrI   | -0.352132 | 0.000069 |
| Y55F3AL.1  | plx-1      | chrIV  | -0.352237 | 0.000088 |
| Y49G5B.1   | Y49G5B.1   | chrV   | -0.352509 | 0.000169 |
| K07D8.1    | mup-4      | chrIII | -0.352515 | 0.000063 |
| C29E4.2    | kle-2      | chrIII | -0.353076 | 0.000062 |
| Y38C1AA.12 | Y38C1AA.12 | chrIV  | -0.353345 | 0.000540 |
| T01H8.5    | gon-2      | chrI   | -0.353516 | 0.000087 |
| Y47G6A.12  | sep-1      | chrI   | -0.353685 | 0.000052 |
| ZK1290.12  | wrt-1      | chrII  | -0.353776 | 0.010282 |
| Y106G6E.6  | csnk-1     | chrI   | -0.353884 | 0.000068 |
| Y66H1B.2   | fln-1      | chrIV  | -0.354450 | 0.000041 |
| K08F4.1    | K08F4.1    | chrIV  | -0.354776 | 0.000060 |
| B0336.3    | B0336.3    | chrIII | -0.354855 | 0.000045 |
| K11C4.5    | unc-68     | chrV   | -0.355058 | 0.000064 |
| F12E12.6   | F12E12.6   | chrII  | -0.355759 | 0.040120 |
| ZK909.4    | ces-2      | chrI   | -0.356055 | 0.000676 |
| T14B4.6    | dpy-2      | chrII  | -0.356128 | 0.000568 |
| C01G8.9    | let-526    | chrI   | -0.356255 | 0.000041 |
| Y47D3A.26  | smc-3      | chrIII | -0.356263 | 0.000049 |
| W02D3.10   | fnci-1     | chrI   | -0.356734 | 0.000064 |
| T01D3.7    | T01D3.7    | chrV   | -0.356856 | 0.029375 |
| F58D5.1    | hrp-2      | chrI   | -0.357168 | 0.000038 |
| C09B8.4    | C09B8.4    | chrX   | -0.357226 | 0.000881 |
| F56H9.5    | lin-25     | chrV   | -0.357284 | 0.000213 |
| C10C6.6    | C10C6.6    | chrIV  | -0.357536 | 0.000044 |
| C29E4.3    | ran-2      | chrIII | -0.357615 | 0.000045 |
| F32A5.8    | F32A5.8    | chrII  | -0.357657 | 0.001252 |
| W04A4.5    | W04A4.5    | chrI   | -0.358034 | 0.000058 |
| K07C10.1   | ptr-13     | chrII  | -0.358538 | 0.000401 |
| C27F2.8    | C27F2.8    | chrIII | -0.358699 | 0.000036 |
| F33H2.5    | F33H2.5    | chrI   | -0.359024 | 0.000039 |
| T01G5.2    | ugt-30     | chrV   | -0.359425 | 0.004775 |
| F20A1.7    | twk-11     | chrV   | -0.359584 | 0.031226 |
| Y53C10A.4  | rga-2      | chrI   | -0.359954 | 0.001138 |
| Y75B8A.24  | Y75B8A.24  | chrIII | -0.359971 | 0.000040 |
| C43E11.3   | met-1      | chrI   | -0.359982 | 0.000037 |
| ZC374.2    | ZC374.2    | chrX   | -0.360870 | 0.006940 |
| K08F8.2    | atf-2      | chrII  | -0.360961 | 0.001081 |
| D1081.7    | D1081.7    | chrI   | -0.360999 | 0.000030 |
| C09E10.2   | dgk-1      | chrX   | -0.362735 | 0.003528 |
| T17E9.1    | kin-18     | chrIII | -0.363614 | 0.000029 |
| M01G12.9   | M01G12.9   | chrI   | -0.363707 | 0.012529 |
| F33H1.4    | F33H1.4    | chrII  | -0.364567 | 0.000028 |
| F56D5.1    | col-121    | chrIV  | -0.365239 | 0.001304 |
| Y65A5A.2   | Y65A5A.2   | chrIV  | -0.365563 | 0.000068 |
| K02F2.3    | teg-4      | chrI   | -0.365629 | 0.000029 |
| C25G4.5    | dpy-26     | chrIV  | -0.366014 | 0.000028 |
| T01G9.4    | npp-2      | chrI   | -0.366244 | 0.000028 |
| Y76B12C.7  | cpsf-1     | chrIV  | -0.366348 | 0.000038 |
| K04C2.2    | K04C2.2    | chrIII | -0.366415 | 0.000032 |
| W03A3.2    | polq-1     | chrIII | -0.366459 | 0.000040 |
| C09D1.1    | unc-89     | chrI   | -0.367027 | 0.000028 |
| F46F11.1   | F46F11.1   | chrI   | -0.367480 | 0.000037 |
| T26A8.1    | T26A8.1    | chrIV  | -0.367552 | 0.000028 |
| C47E8.5    | daf-21     | chrV   | -0.367766 | 0.000018 |
| T27C10.6   | lrk-1      | chrI   | -0.367779 | 0.000057 |
| C05C10.2   | C05C10.2   | chrII  | -0.367794 | 0.000025 |
| Y54E10BR.1 | Y54E10BR.1 | chrI   | -0.368013 | 0.000067 |
| F40E10.1   | hch-1      | chrX   | -0.368540 | 0.000156 |
| W03B1.2    | W03B1.2    | chrIV  | -0.368668 | 0.030763 |
| C24H11.7   | gbf-1      | chrIII | -0.369248 | 0.000026 |
| R05C11.3   | mca-2      | chrIV  | -0.369290 | 0.000080 |
| C05C8.4    | gei-6      | chrV   | -0.369416 | 0.000026 |

|            |            |        |           |          |
|------------|------------|--------|-----------|----------|
| D1005.1    | D1005.1    | chrX   | -0.370012 | 0.000024 |
| Y47D3A.28  | Y47D3A.28  | chrIII | -0.370019 | 0.000093 |
| T22B11.5   | T22B11.5   | chrIV  | -0.370456 | 0.000018 |
| W09C2.3    | mca-1      | chrIV  | -0.370661 | 0.000024 |
| R90.1      | R90.1      | chrV   | -0.371155 | 0.000100 |
| Y71H2AM.2  | Y71H2AM.2  | chrIII | -0.371413 | 0.000041 |
| F27E5.2    | pax-3      | chrII  | -0.372365 | 0.024161 |
| F19H8.1    | tps-2      | chrII  | -0.372911 | 0.000055 |
| C26E6.4    | rpb-2      | chrIII | -0.372985 | 0.000019 |
| C26E6.9    | set-2      | chrIII | -0.373114 | 0.000021 |
| T20H4.3    | pars-1     | chrIII | -0.373353 | 0.000017 |
| C42D8.5    | acn-1      | chrX   | -0.373587 | 0.000165 |
| F15D3.1    | dys-1      | chrI   | -0.373595 | 0.000032 |
| H38K22.5   | gly-6      | chrIII | -0.373794 | 0.000093 |
| C06E7.4    | C06E7.4    | chrIV  | -0.373823 | 0.000570 |
| Y37A1B.17  | Y37A1B.17  | chrIV  | -0.373823 | 0.000033 |
| T16G1.9    | T16G1.9    | chrV   | -0.373856 | 0.000039 |
| T24A11.1   | mtm-3      | chrIII | -0.373880 | 0.000015 |
| C48A7.1    | egl-19     | chrIV  | -0.373980 | 0.000102 |
| C09H6.1    | spr-4      | chrI   | -0.374119 | 0.000023 |
| C16A3.3    | let-716    | chrIII | -0.374243 | 0.000016 |
| T28C6.7    | T28C6.7    | chrIV  | -0.374722 | 0.000019 |
| T05A10.1   | sma-9      | chrX   | -0.375920 | 0.000021 |
| F07F6.4    | F07F6.4    | chrII  | -0.375924 | 0.000021 |
| Y80D3A.1   | wars-1     | chrV   | -0.376150 | 0.000024 |
| Y71F9AL.17 | Y71F9AL.17 | chrI   | -0.376460 | 0.000013 |
| F38A1.8    | F38A1.8    | chrIV  | -0.376982 | 0.000027 |
| K04G7.3    | ogt-1      | chrIII | -0.378035 | 0.000015 |
| F21C10.7   | F21C10.7   | chrV   | -0.378076 | 0.000028 |
| T13H2.4    | pqn-65     | chrX   | -0.378270 | 0.000015 |
| C16D9.2    | rol-3      | chrV   | -0.378306 | 0.000777 |
| R08F11.1   | R08F11.1   | chrV   | -0.378390 | 0.000090 |
| M110.4     | ifg-1      | chrII  | -0.378824 | 0.000011 |
| C14C11.8   | pqn-13     | chrV   | -0.378926 | 0.009359 |
| Y55B1BR.4  | Y55B1BR.4  | chrIII | -0.378985 | 0.000188 |
| F33H2.2    | F33H2.2    | chrI   | -0.379335 | 0.000017 |
| F35H10.10  | F35H10.10  | chrIV  | -0.379347 | 0.000041 |
| F25F2.2    | cdh-4      | chrIII | -0.379348 | 0.000014 |
| Y59A8B.1   | dpy-21     | chrV   | -0.379605 | 0.000025 |
| F23D12.2   | F23D12.2   | chrX   | -0.380081 | 0.000258 |
| C47E12.1   | sars-1     | chrIV  | -0.380230 | 0.000012 |
| T08A11.2   | T08A11.2   | chrIII | -0.380256 | 0.000012 |
| ZK328.2    | eftu-2     | chrIII | -0.381109 | 0.000011 |
| Y59A8A.3   | Y59A8A.3   | chrV   | -0.381431 | 0.000009 |
| F53A3.4    | pqn-41     | chrIII | -0.381510 | 0.000021 |
| C43E11.6   | nab-1      | chrI   | -0.381707 | 0.000069 |
| C04G6.3    | pId-1      | chrII  | -0.381863 | 0.000014 |
| C23F12.1   | fln-2      | chrX   | -0.382054 | 0.000016 |
| T06E4.3    | atl-1      | chrV   | -0.382699 | 0.000011 |
| C06B8.7    | C06B8.7    | chrV   | -0.383127 | 0.000077 |
| T23F2.1    | bus-8      | chrX   | -0.383286 | 0.006842 |
| F26H11.4   | F26H11.4   | chrII  | -0.383375 | 0.002233 |
| C10H11.9   | let-502    | chrI   | -0.383498 | 0.000010 |
| C01F1.3    | C01F1.3    | chrII  | -0.383986 | 0.000135 |
| T04H1.4    | rad-50     | chrV   | -0.384078 | 0.000011 |
| F59C12.1   | cdh-9      | chrX   | -0.384147 | 0.029406 |
| ZK1127.9   | tcer-1     | chrII  | -0.384175 | 0.000011 |
| Y110A2AM.3 | ubc-26     | chrII  | -0.384386 | 0.000115 |
| R74.1      | lars-1     | chrIII | -0.384395 | 0.000009 |
| Y47D3A.21  | Y47D3A.21  | chrIII | -0.384531 | 0.000030 |
| T20F10.1   | wts-1      | chrI   | -0.384762 | 0.000061 |
| F10C2.3    | F10C2.3    | chrV   | -0.385020 | 0.013466 |
| W06H8.8    | ttn-1      | chrV   | -0.385180 | 0.000012 |

|             |             |        |           |          |
|-------------|-------------|--------|-----------|----------|
| F42A9.1     | dgk-4       | chrIV  | -0.385874 | 0.000009 |
| T01G1.3     | sec-31      | chrIV  | -0.385933 | 0.000010 |
| Y106G6H.12  | duo-3       | chrI   | -0.385960 | 0.000012 |
| F41H10.3    | F41H10.3    | chrIV  | -0.386324 | 0.000009 |
| Y105E8A.14  | Y105E8A.14  | chrI   | -0.386600 | 0.000018 |
| F40F11.2    | F40F11.2    | chrIV  | -0.386654 | 0.000010 |
| C44B9.4     | athp-1      | chrIII | -0.386927 | 0.000013 |
| Y37E11B.4   | taf-2       | chrIV  | -0.387034 | 0.000031 |
| T01D3.3     | T01D3.3     | chrV   | -0.387292 | 0.003318 |
| R17.3       | R17.3       | chrIII | -0.387622 | 0.001353 |
| K12C11.4    | dapk-1      | chrI   | -0.387671 | 0.000046 |
| H06O01.3    | ctg-1       | chrI   | -0.387781 | 0.000550 |
| Y54E10A.11  | Y54E10A.11  | chrI   | -0.387826 | 0.000012 |
| F08B4.1     | dic-1       | chrIV  | -0.387963 | 0.000016 |
| C06C3.1     | mel-11      | chrII  | -0.388060 | 0.000008 |
| W05F2.4     | W05F2.4     | chrI   | -0.388244 | 0.000048 |
| C33H5.9     | sec-10      | chrIV  | -0.388497 | 0.000018 |
| F35G12.8    | smc-4       | chrIII | -0.388594 | 0.000007 |
| Y54E10A.15  | cdt-1       | chrI   | -0.388595 | 0.000014 |
| ZK1098.10   | unc-16      | chrIII | -0.389378 | 0.000008 |
| F48E3.8     | F48E3.8     | chrX   | -0.389547 | 0.000787 |
| K08E5.3     | mua-3       | chrIII | -0.389566 | 0.000013 |
| Y65B4BL.1   | Y65B4BL.1   | chrI   | -0.390037 | 0.000177 |
| F44G4.8     | dep-1       | chrII  | -0.390285 | 0.000067 |
| T14G8.3     | T14G8.3     | chrX   | -0.391096 | 0.000009 |
| F30F8.8     | taf-5       | chrI   | -0.391220 | 0.000010 |
| B0228.6     | B0228.6     | chrII  | -0.391721 | 0.005331 |
| Y22D7AR.9   | fbxa-74     | chrIII | -0.391762 | 0.005084 |
| D2085.1     | pyr-1       | chrII  | -0.392273 | 0.000007 |
| M03C11.8    | M03C11.8    | chrIII | -0.392288 | 0.000007 |
| F54F2.1     | pat-2       | chrIII | -0.392402 | 0.000014 |
| F48A11.1    | chs-2       | chrII  | -0.392411 | 0.000876 |
| C18F3.2     | sax-7       | chrIV  | -0.392549 | 0.000005 |
| C11G6.1     | taf-3       | chrX   | -0.392767 | 0.000077 |
| F13B9.1     | F13B9.1     | chrX   | -0.393640 | 0.000008 |
| Y47G6A.10   | spg-7       | chrI   | -0.393991 | 0.000007 |
| C04D8.1     | pac-1       | chrIII | -0.394248 | 0.000007 |
| ZC443.6     | ugt-16      | chrV   | -0.395043 | 0.000129 |
| Y75B8A.8    | Y75B8A.8    | chrIII | -0.395108 | 0.000009 |
| R06C1.3     | wve-1       | chrI   | -0.395716 | 0.000010 |
| K09F6.10    | K09F6.10    | chrII  | -0.395915 | 0.005520 |
| T05A12.4    | T05A12.4    | chrIV  | -0.396035 | 0.000027 |
| C08B11.3    | C08B11.3    | chrII  | -0.396202 | 0.000004 |
| Y38E10A.6   | ceh-100     | chrII  | -0.396334 | 0.000007 |
| T16G12.5    | ekl-6       | chrIII | -0.396441 | 0.000007 |
| Y53G8AR.6   | Y53G8AR.6   | chrIII | -0.396714 | 0.000014 |
| R08C7.9     | fbxb-74     | chrIV  | -0.396975 | 0.032287 |
| C47E12.5    | uba-1       | chrIV  | -0.397577 | 0.000003 |
| F09F7.3     | F09F7.3     | chrIII | -0.398325 | 0.000004 |
| C52E12.2    | unc-104     | chrII  | -0.398776 | 0.000089 |
| C48G7.3     | tag-333     | chrV   | -0.399187 | 0.000004 |
| C23G10.4    | rpn-2       | chrIII | -0.399798 | 0.000003 |
| T04A8.14    | emb-5       | chrIII | -0.400238 | 0.000003 |
| BE0003N10.3 | BE0003N10.3 | chrIII | -0.400282 | 0.005297 |
| T25G3.2     | chs-1       | chrI   | -0.401336 | 0.000003 |
| Y108G3AL.1  | cul-3       | chrV   | -0.401703 | 0.000003 |
| F16A11.3    | ppfr-1      | chrI   | -0.401746 | 0.000004 |
| C37C3.6     | mig-6       | chrV   | -0.401820 | 0.000003 |
| F30H5.1     | unc-45      | chrIII | -0.401982 | 0.000005 |
| C26C6.1     | pbrm-1      | chrI   | -0.401984 | 0.000003 |
| F14B4.3     | F14B4.3     | chrI   | -0.402378 | 0.000004 |
| F02E9.4     | sin-3       | chrI   | -0.402610 | 0.000003 |
| F25G6.2     | symk-1      | chrV   | -0.402643 | 0.000005 |



|           |           |        |           |          |
|-----------|-----------|--------|-----------|----------|
| Y39B6A.33 | Y39B6A.33 | chrV   | -0.402781 | 0.000007 |
| F54E12.2  | F54E12.2  | chrIV  | -0.402790 | 0.000003 |
| C25F6.2   | dlg-1     | chrX   | -0.403272 | 0.000005 |
| ZC8.4     | lfi-1     | chrX   | -0.403536 | 0.000004 |
| F42C5.10  | F42C5.10  | chrIV  | -0.403575 | 0.000015 |
| C17H12.1  | dyci-1    | chrIV  | -0.403756 | 0.000004 |
| Y53C12B.3 | nos-3     | chrII  | -0.403965 | 0.000003 |
| T27C4.4   | lin-40    | chrV   | -0.404196 | 0.000004 |
| Y57G11A.1 | tag-273   | chrIV  | -0.404248 | 0.000008 |
| F59A6.5   | F59A6.5   | chrII  | -0.404665 | 0.000003 |
| Y46C8AL.3 | clcc-70   | chrIV  | -0.404699 | 0.003462 |
| Y70G10A.3 | Y70G10A.3 | chrIII | -0.404906 | 0.000723 |
| F23H12.8  | fipr-1    | chrV   | -0.404934 | 0.000596 |
| F55F8.1   | ptr-10    | chrI   | -0.405043 | 0.023212 |
| ZK430.1   | toe-1     | chrII  | -0.406668 | 0.000003 |
| C47D12.1  | trr-1     | chrII  | -0.406711 | 0.000003 |
| C35B8.2   | vav-1     | chrX   | -0.406788 | 0.000020 |
| ZK370.4   | ZK370.4   | chrIII | -0.406819 | 0.000002 |
| K04G2.8   | apr-1     | chrI   | -0.407123 | 0.000003 |
| T24C12.2  | gap-1     | chrX   | -0.407174 | 0.005316 |
| F17C11.1  | F17C11.1  | chrV   | -0.408056 | 0.000154 |
| F14F9.4   | F14F9.4   | chrV   | -0.408241 | 0.004043 |
| T16G12.3  | T16G12.3  | chrIII | -0.408610 | 0.005183 |
| B0403.3   | B0403.3   | chrX   | -0.408859 | 0.015147 |
| ZK822.1   | ZK822.1   | chrIV  | -0.408908 | 0.002401 |
| T19B4.7   | unc-40    | chrI   | -0.408935 | 0.000002 |
| T23D8.8   | cfi-1     | chrI   | -0.408967 | 0.009920 |
| Y55F3AR.3 | cct-8     | chrIV  | -0.408986 | 0.000002 |
| F23H11.4  | F23H11.4  | chrIII | -0.409243 | 0.000004 |
| F54E4.1   | rbc-1     | chrX   | -0.409630 | 0.000003 |
| H05L14.2  | H05L14.2  | chrI   | -0.409927 | 0.000003 |
| F20C5.6   | F20C5.6   | chrIV  | -0.410028 | 0.000056 |
| Y65B4A.6  | Y65B4A.6  | chrI   | -0.410141 | 0.000003 |
| C34B4.1   | max-1     | chrV   | -0.410283 | 0.001071 |
| Y113G7A.3 | sec-23    | chrV   | -0.410329 | 0.000003 |
| C44E4.1   | C44E4.1   | chrI   | -0.411866 | 0.000002 |
| Y51A2D.19 | slo-1     | chrV   | -0.411886 | 0.000801 |
| Y41E3.9   | fcd-2     | chrIV  | -0.411945 | 0.000004 |
| Y54E10A.2 | cogc-1    | chrI   | -0.411998 | 0.000004 |
| C25A1.7   | iars-2    | chrI   | -0.412351 | 0.000003 |
| C34B2.6   | C34B2.6   | chrI   | -0.412651 | 0.000002 |
| Y75B8A.19 | Y75B8A.19 | chrIII | -0.412843 | 0.000488 |
| H38K22.1  | evl-14    | chrIII | -0.412917 | 0.000002 |
| F54E7.3   | par-3     | chrIII | -0.412925 | 0.000002 |
| ZK484.4   | ZK484.4   | chrI   | -0.413057 | 0.000002 |
| F56A11.1  | gex-2     | chrIV  | -0.413834 | 0.000003 |
| C02H7.3   | aex-3     | chrX   | -0.413864 | 0.000157 |
| F20G4.3   | nmy-2     | chrI   | -0.414419 | 0.000001 |
| C17C3.12  | acdh-2    | chrII  | -0.414904 | 0.037661 |
| K07E3.7   | catp-5    | chrX   | -0.415408 | 0.000100 |
| F42A10.7  | F42A10.7  | chrIII | -0.416309 | 0.000003 |
| Y95B8A.10 | pde-6     | chrI   | -0.416561 | 0.000031 |
| F41A4.1   | cutl-28   | chrIV  | -0.417190 | 0.003909 |
| T08A9.1   | atg-11    | chrX   | -0.417329 | 0.000004 |
| Y41D4A.8  | Y41D4A.8  | chrIV  | -0.417402 | 0.003266 |
| Y53H1C.2  | ego-2     | chrI   | -0.417755 | 0.000002 |
| C32E8.10  | unc-11    | chrI   | -0.417816 | 0.000003 |
| Y24D9A.1  | ell-1     | chrIV  | -0.417862 | 0.000003 |
| Y50D7A.8  | Y50D7A.8  | chrIII | -0.417884 | 0.000004 |
| Y71H2B.3  | ppfr-4    | chrIII | -0.417965 | 0.000004 |
| F59A2.6   | F59A2.6   | chrIII | -0.417988 | 0.000003 |
| F15G9.4   | him-4     | chrX   | -0.418743 | 0.000002 |
| F48E8.4   | F48E8.4   | chrIII | -0.419197 | 0.000002 |

|             |            |        |           |          |
|-------------|------------|--------|-----------|----------|
| C26H9A.2    | C26H9A.2   | chrIV  | -0.419428 | 0.000005 |
| F59A6.1     | nsy-1      | chrII  | -0.419659 | 0.000002 |
| ZK1005.1    | pme-5      | chrV   | -0.421569 | 0.000002 |
| C27B7.4     | rad-26     | chrIV  | -0.421956 | 0.000001 |
| C53D5.6     | imb-3      | chrI   | -0.421974 | 0.000001 |
| Y87G2A.5    | vars-2     | chrI   | -0.423562 | 0.000001 |
| F44E7.4     | F44E7.4    | chrV   | -0.423600 | 0.000001 |
| Y47D3A.29   | Y47D3A.29  | chrIII | -0.423961 | 0.000001 |
| Y43F8C.12   | mrp-7      | chrV   | -0.424311 | 0.000001 |
| Y54F10BM.14 | phf-5      | chrIII | -0.424700 | 0.000008 |
| C07A12.1    | ham-2      | chrX   | -0.426184 | 0.000619 |
| C10G11.6    | C10G11.6   | chrI   | -0.426310 | 0.000008 |
| F01F1.9     | F01F1.9    | chrIII | -0.427819 | 0.000002 |
| Y48E1C.3    | tbc-15     | chrII  | -0.427872 | 0.000004 |
| Y48A6C.1    | Y48A6C.1   | chrIII | -0.428365 | 0.020275 |
| F53F8.5     | F53F8.5    | chrV   | -0.428719 | 0.000001 |
| C13F10.4    | C13F10.4   | chrV   | -0.428794 | 0.000001 |
| F31C3.3     | F31C3.3    | chrI   | -0.428970 | 0.000001 |
| W03B1.7     | oac-51     | chrIV  | -0.429625 | 0.006892 |
| Y37E11C.1   | unc-33     | chrIV  | -0.429842 | 0.000002 |
| F20G4.1     | smgl-1     | chrI   | -0.430197 | 0.000001 |
| F07A11.4    | F07A11.4   | chrII  | -0.430298 | 0.000007 |
| ZK867.1     | syd-9      | chrX   | -0.430479 | 0.000007 |
| F11A10.4    | mon-2      | chrIV  | -0.430660 | 0.000001 |
| K12D12.2    | npp-3      | chrII  | -0.431054 | 0.000001 |
| T12F5.3     | glh-4      | chrI   | -0.431070 | 0.000021 |
| Y67D8C.10   | mca-3      | chrIV  | -0.431709 | 0.000000 |
| C02F4.1     | ced-5      | chrIV  | -0.432502 | 0.000001 |
| R09A1.1     | ergo-1     | chrV   | -0.432622 | 0.000000 |
| C03B8.4     | lin-13     | chrIII | -0.433157 | 0.000000 |
| C26G2.1     | syg-2      | chrX   | -0.433182 | 0.000023 |
| K02C4.3     | K02C4.3    | chrII  | -0.433315 | 0.000000 |
| Y59A8B.22   | snx-6      | chrV   | -0.433445 | 0.000001 |
| F12F6.6     | sec-24.1   | chrIV  | -0.433871 | 0.000000 |
| K08C7.3     | epi-1      | chrIV  | -0.434817 | 0.000000 |
| T21E3.3     | lrp-2      | chrI   | -0.434890 | 0.000001 |
| Y17G7B.3    | Y17G7B.3   | chrII  | -0.435853 | 0.000027 |
| Y18H1A.3    | Y18H1A.3   | chrI   | -0.435953 | 0.000001 |
| F54C4.3     | F54C4.3    | chrIII | -0.436144 | 0.000001 |
| Y48A6C.4    | Y48A6C.4   | chrIII | -0.436289 | 0.000003 |
| K10D3.4     | K10D3.4    | chrI   | -0.436672 | 0.000002 |
| F59E12.9    | F59E12.9   | chrII  | -0.438234 | 0.000000 |
| C41A3.1     | C41A3.1    | chrX   | -0.438419 | 0.000016 |
| W05B2.6     | col-92     | chrIII | -0.439291 | 0.000030 |
| C04E7.3     | C04E7.3    | chrX   | -0.439555 | 0.008117 |
| F20D12.1    | csr-1      | chrIV  | -0.439639 | 0.000000 |
| C10C6.1     | kin-4      | chrIV  | -0.439683 | 0.000000 |
| F54E2.3     | ketn-1     | chrV   | -0.439753 | 0.000000 |
| F54D11.2    | F54D11.2   | chrV   | -0.439971 | 0.000000 |
| T22D1.9     | rpn-1      | chrIV  | -0.440030 | 0.000000 |
| T25C12.3    | T25C12.3   | chrX   | -0.440523 | 0.000000 |
| Y71G12A.3   | tub-2      | chrI   | -0.440558 | 0.000002 |
| T16G12.1    | T16G12.1   | chrIII | -0.440898 | 0.000001 |
| Y50D7A.1    | Y50D7A.1   | chrIII | -0.441345 | 0.000013 |
| C47C12.3    | ref-2      | chrX   | -0.441441 | 0.001234 |
| F47D12.5    | F47D12.5   | chrIII | -0.442730 | 0.002888 |
| C36E6.3     | mlc-1      | chrX   | -0.443016 | 0.000000 |
| Y66D12A.14  | Y66D12A.14 | chrIII | -0.443299 | 0.030348 |
| K07G5.3     | K07G5.3    | chrI   | -0.444193 | 0.031527 |
| C05D11.1    | C05D11.1   | chrIII | -0.444195 | 0.000000 |
| K08F8.6     | let-19     | chrII  | -0.445142 | 0.000000 |
| Y116A8C.9   | Y116A8C.9  | chrIV  | -0.445334 | 0.000006 |
| BE10.3      | BE10.3     | chrIII | -0.446469 | 0.010124 |

|            |            |        |           |          |
|------------|------------|--------|-----------|----------|
| Y41D4B.6   | Y41D4B.6   | chrIV  | -0.446891 | 0.004129 |
| T14G10.2   | pxf-1      | chrIV  | -0.447393 | 0.000000 |
| F47A4.5    | F47A4.5    | chrX   | -0.448666 | 0.000002 |
| Y49A3A.1   | Y49A3A.1   | chrV   | -0.448774 | 0.000000 |
| Y48G1C.2   | csk-1      | chrI   | -0.450307 | 0.000000 |
| F53B6.9    | fip-6      | chrI   | -0.451211 | 0.008755 |
| F59F5.6    | syd-2      | chrX   | -0.452157 | 0.000001 |
| F08A8.3    | F08A8.3    | chrI   | -0.452179 | 0.002035 |
| C42D4.8    | rpc-1      | chrIV  | -0.452400 | 0.000000 |
| F56H1.5    | ccpp-1     | chrI   | -0.452853 | 0.000000 |
| R11A8.6    | iars-1     | chrIV  | -0.453574 | 0.000000 |
| F46F11.9   | F46F11.9   | chrI   | -0.453757 | 0.000000 |
| C17D12.7   | C17D12.7   | chrI   | -0.454390 | 0.000001 |
| T14F9.4    | peb-1      | chrX   | -0.454539 | 0.000536 |
| C02B10.5   | C02B10.5   | chrIV  | -0.454803 | 0.000000 |
| F44E2.4    | F44E2.4    | chrIII | -0.455298 | 0.000013 |
| K06A1.3    | cutl-16    | chrII  | -0.455584 | 0.000060 |
| K12F2.1    | myo-3      | chrV   | -0.455867 | 0.000000 |
| C14B9.6    | gei-8      | chrIII | -0.456412 | 0.000000 |
| F31D4.2    | F31D4.2    | chrV   | -0.456511 | 0.000000 |
| R07G3.3    | npp-21     | chrII  | -0.456861 | 0.000000 |
| ZC518.3    | ccr-4      | chrIV  | -0.456950 | 0.000000 |
| Y6D11A.1   | exos-4.2   | chrIII | -0.457090 | 0.000000 |
| T19C4.1    | T19C4.1    | chrV   | -0.457842 | 0.000438 |
| Y39D8C.1   | abt-4      | chrV   | -0.458285 | 0.000000 |
| ZK287.1    | ZK287.1    | chrV   | -0.458395 | 0.000178 |
| K11D12.4   | cpt-4      | chrV   | -0.458539 | 0.000297 |
| C35A5.8    | C35A5.8    | chrV   | -0.459963 | 0.000000 |
| F55H2.6    | clu-1      | chrIII | -0.460216 | 0.000000 |
| C27D11.1   | egl-45     | chrIII | -0.460680 | 0.000000 |
| R08B4.2    | alr-1      | chrX   | -0.461211 | 0.001773 |
| Y67D8C.5   | eel-1      | chrIV  | -0.461608 | 0.000000 |
| F16D3.4    | F16D3.4    | chrI   | -0.463867 | 0.000000 |
| T17E9.2    | nmt-1      | chrIII | -0.463869 | 0.000000 |
| T05H4.6    | T05H4.6a   | chrV   | -0.463887 | 0.000000 |
| Y116A8C.32 | sfa-1      | chrIV  | -0.465701 | 0.000000 |
| Y16B4A.1   | unc-3      | chrX   | -0.465909 | 0.005189 |
| F22B5.7    | zyg-9      | chrII  | -0.465953 | 0.000000 |
| K08E4.1    | spt-5      | chrIV  | -0.466111 | 0.000000 |
| ZC101.3    | hhat-1     | chrII  | -0.466726 | 0.001297 |
| Y57G11C.37 | Y57G11C.37 | chrIV  | -0.467349 | 0.000674 |
| C14C11.2   | C14C11.2   | chrV   | -0.468107 | 0.000606 |
| C38C10.5   | rgr-1      | chrIII | -0.468839 | 0.000000 |
| T20G5.1    | chc-1      | chrIII | -0.470419 | 0.000000 |
| Y54E2A.4   | Y54E2A.4   | chrII  | -0.470791 | 0.000000 |
| K02B12.5   | K02B12.5   | chrI   | -0.471425 | 0.000000 |
| Y47G6A.11  | msh-6      | chrI   | -0.471675 | 0.000000 |
| Y111B2A.12 | Y111B2A.12 | chrIII | -0.473555 | 0.000000 |
| C33D12.2   | C33D12.2   | chrX   | -0.474740 | 0.000140 |
| C30C11.4   | C30C11.4   | chrIII | -0.475218 | 0.000000 |
| F52B5.3    | F52B5.3    | chrI   | -0.476098 | 0.000000 |
| T19D12.1   | T19D12.1   | chrII  | -0.476667 | 0.000001 |
| C52D10.1   | C52D10.1   | chrIV  | -0.477536 | 0.000053 |
| H19N07.2   | math-33    | chrV   | -0.477813 | 0.000000 |
| R13F6.4    | ten-1      | chrIII | -0.478191 | 0.000000 |
| F14B4.1    | F14B4.1    | chrI   | -0.478824 | 0.000002 |
| F11C1.6    | nhr-25     | chrX   | -0.479396 | 0.000004 |
| F26A3.3    | ego-1      | chrI   | -0.480063 | 0.000000 |
| Y59C2A.2   | Y59C2A.2   | chrII  | -0.480281 | 0.000000 |
| Y57A10A.31 | Y57A10A.31 | chrII  | -0.481655 | 0.000000 |
| F31D5.5    | F31D5.5    | chrII  | -0.481701 | 0.000147 |
| T05H10.3   | T05H10.3   | chrII  | -0.481777 | 0.001293 |
| T22F7.3    | T22F7.3    | chrIII | -0.483232 | 0.030766 |

|            |            |        |           |          |
|------------|------------|--------|-----------|----------|
| F56B3.5    | ech-5      | chrIV  | -0.483723 | 0.000000 |
| K07H8.6    | vit-6      | chrIV  | -0.485540 | 0.000000 |
| Y32H12A.8  | Y32H12A.8  | chrIII | -0.486566 | 0.000000 |
| C02F12.7   | tag-278    | chrX   | -0.487679 | 0.000001 |
| C45B2.7    | ptr-4      | chrX   | -0.489598 | 0.000017 |
| R09E10.7   | pqn-55     | chrIV  | -0.490183 | 0.000000 |
| K10D2.3    | cid-1      | chrIII | -0.491556 | 0.000000 |
| W10G11.17  | W10G11.17  | chrII  | -0.491678 | 0.000145 |
| C24B5.3    | ptr-1      | chrV   | -0.491958 | 0.000122 |
| Y18D10A.5  | gsk-3      | chrI   | -0.492543 | 0.000000 |
| R144.7     | larp-1     | chrIII | -0.492623 | 0.000000 |
| Y92C3B.3   | rab-18     | chrIII | -0.492683 | 0.000000 |
| K12H4.8    | dcr-1      | chrIII | -0.492839 | 0.000000 |
| C30F8.4    | kin-32     | chrI   | -0.493331 | 0.000001 |
| K09B11.9   | uso-1      | chrIV  | -0.493988 | 0.000000 |
| F01G4.1    | psa-4      | chrIV  | -0.494754 | 0.000000 |
| T10H10.1   | hum-6      | chrX   | -0.494963 | 0.000001 |
| F21H12.6   | F21H12.6   | chrII  | -0.496108 | 0.000000 |
| T21E12.4   | dhc-1      | chrI   | -0.496760 | 0.000000 |
| Y57A10A.10 | Y57A10A.10 | chrII  | -0.497172 | 0.000000 |
| F11C1.5    | F11C1.5    | chrX   | -0.497199 | 0.000000 |
| F17A9.3    | F17A9.3    | chrV   | -0.497362 | 0.009288 |
| T19A5.3    | T19A5.3    | chrV   | -0.497517 | 0.000480 |
| C15H11.3   | nxf-1      | chrV   | -0.498250 | 0.000000 |
| F32E10.4   | ima-3      | chrIV  | -0.498259 | 0.000000 |
| Y60A3A.10  | dhs-24     | chrV   | -0.498347 | 0.000000 |
| C48B6.6    | smg-1      | chrI   | -0.499156 | 0.000000 |
| F20H11.2   | let-765    | chrIII | -0.499308 | 0.000000 |
| M28.1      | cutl-9     | chrII  | -0.499474 | 0.000236 |
| W02C12.1   | W02C12.1   | chrIV  | -0.499484 | 0.000001 |
| F39C12.1   | F39C12.1   | chrX   | -0.500941 | 0.000000 |
| M70.5      | M70.5      | chrIV  | -0.501584 | 0.000018 |
| Y73B3A.10  | Y73B3A.10  | chrX   | -0.501900 | 0.000115 |
| F57A8.1    | F57A8.1    | chrV   | -0.502636 | 0.000000 |
| C17H12.9   | ceh-48     | chrIV  | -0.502998 | 0.001297 |
| C30G12.2   | C30G12.2   | chrII  | -0.503650 | 0.000000 |
| F25H5.4    | eef-2      | chrI   | -0.503938 | 0.000000 |
| F10F2.1    | sel-2      | chrIII | -0.505072 | 0.000000 |
| F53B3.3    | F53B3.3    | chrX   | -0.505579 | 0.010240 |
| Y39E4B.1   | abce-1     | chrIII | -0.505599 | 0.000000 |
| W08G11.4   | pptr-1     | chrV   | -0.505915 | 0.000000 |
| Y43F8B.1   | Y43F8B.1   | chrV   | -0.506516 | 0.000000 |
| ZC116.3    | ZC116.3    | chrV   | -0.507820 | 0.000054 |
| F28F8.7    | F28F8.7    | chrV   | -0.508294 | 0.007369 |
| Y43F8C.6   | Y43F8C.6   | chrV   | -0.508894 | 0.000003 |
| ZK593.4    | rbr-2      | chrIV  | -0.509451 | 0.000000 |
| Y110A7A.3  | unc-63     | chrI   | -0.510536 | 0.000662 |
| C10C5.6    | daf-15     | chrIV  | -0.510622 | 0.000000 |
| Y61A9LA.8  | sut-2      | chrV   | -0.510682 | 0.000000 |
| Y76B12C.6  | Y76B12C.6  | chrIV  | -0.510716 | 0.000000 |
| F56A6.1    | sago-2     | chrI   | -0.511304 | 0.000047 |
| B0261.2    | let-363    | chrI   | -0.511975 | 0.000000 |
| Y37E11AL.8 | taf-6.2    | chrIV  | -0.512678 | 0.000000 |
| R11A8.7    | R11A8.7    | chrIV  | -0.513168 | 0.000000 |
| Y17G7B.18  | Y17G7B.18  | chrII  | -0.513281 | 0.000000 |
| F42G2.3    | fbxc-20    | chrII  | -0.514647 | 0.013163 |
| F40E10.4   | slt-1      | chrX   | -0.514647 | 0.000024 |
| Y57G11C.10 | gdi-1      | chrIV  | -0.515889 | 0.000000 |
| F45H11.4   | mgl-2      | chrI   | -0.516174 | 0.000150 |
| C25F6.4    | ddr-1      | chrX   | -0.517217 | 0.000017 |
| D1025.10   | D1025.10   | chrX   | -0.517577 | 0.000080 |
| T14G8.1    | chd-3      | chrX   | -0.517882 | 0.000000 |
| Y38F2AR.13 | Y38F2AR.13 | chrIV  | -0.518042 | 0.000059 |

|             |             |        |           |          |
|-------------|-------------|--------|-----------|----------|
| C32E8.11    | C32E8.11    | chrI   | -0.519179 | 0.000000 |
| C06A5.1     | C06A5.1     | chrI   | -0.519256 | 0.000000 |
| M03D4.4     | M03D4.4     | chrIV  | -0.519411 | 0.000003 |
| T19B4.1     | T19B4.1     | chrI   | -0.520775 | 0.000000 |
| T14E8.4     | T14E8.4     | chrX   | -0.521579 | 0.048728 |
| F26F12.7    | let-418     | chrV   | -0.521587 | 0.000000 |
| Y56A3A.28   | Y56A3A.28   | chrIII | -0.521665 | 0.000000 |
| F53H4.6     | F53H4.6     | chrX   | -0.522463 | 0.000006 |
| C53B4.4     | C53B4.4     | chrIV  | -0.523379 | 0.000000 |
| W04A8.7     | taf-1       | chrI   | -0.523425 | 0.000000 |
| C56G2.1     | C56G2.1     | chrIII | -0.524101 | 0.000000 |
| W05B5.3     | nhr-85      | chrI   | -0.525259 | 0.002923 |
| F59C6.11    | F59C6.11    | chrI   | -0.525367 | 0.013207 |
| F35E12.7    | dct-17      | chrV   | -0.525538 | 0.000876 |
| R02F2.2     | R02F2.2     | chrIII | -0.526147 | 0.000047 |
| F14H12.3    | F14H12.3    | chrX   | -0.526760 | 0.000008 |
| F02A9.6     | glp-1       | chrIII | -0.526946 | 0.000000 |
| Y71F9AL.18  | pme-1       | chrI   | -0.527657 | 0.000000 |
| W06E11.1    | W06E11.1    | chrIII | -0.527756 | 0.000000 |
| Y47G6A.5    | Y47G6A.5    | chrI   | -0.527916 | 0.000001 |
| B0393.5     | B0393.5     | chrIII | -0.528343 | 0.000023 |
| F13B9.6     | cutl-29     | chrX   | -0.529037 | 0.011025 |
| F21G4.2     | mrp-4       | chrX   | -0.529397 | 0.000000 |
| Y48G8AR.1   | grh-1       | chrI   | -0.529532 | 0.000217 |
| F57C2.6     | spat-1      | chrII  | -0.529936 | 0.000000 |
| M153.2      | M153.2      | chrX   | -0.530945 | 0.000010 |
| F26F4.7     | nhl-2       | chrIII | -0.531206 | 0.000000 |
| F21F8.4     | F21F8.4     | chrV   | -0.531225 | 0.000000 |
| Y54G2A.40   | Y54G2A.40   | chrIV  | -0.531513 | 0.036759 |
| W04G3.1     | lpr-6       | chrX   | -0.532377 | 0.000006 |
| M4.1        | M4.1        | chrIV  | -0.533078 | 0.000000 |
| D1044.2     | D1044.2     | chrIII | -0.534746 | 0.000000 |
| F43G6.11    | F43G6.11    | chrII  | -0.535692 | 0.000541 |
| C52E12.1    | C52E12.1    | chrII  | -0.536207 | 0.000000 |
| T03G6.1     | T03G6.1     | chrX   | -0.536208 | 0.000161 |
| R05D3.7     | unc-116     | chrIII | -0.536551 | 0.000000 |
| C36B1.9     | C36B1.9     | chrI   | -0.537300 | 0.000000 |
| Y105E8A.24  | Y105E8A.24  | chrI   | -0.537609 | 0.000000 |
| T22E5.2     | glf-4       | chrX   | -0.537804 | 0.000009 |
| Y48G9A.3    | gcn-1       | chrIII | -0.538234 | 0.000000 |
| Y39G10AR.11 | Y39G10AR.11 | chrI   | -0.538977 | 0.000000 |
| F22G12.5    | F22G12.5    | chrI   | -0.539374 | 0.000000 |
| F53H1.4     | F53H1.4     | chrIV  | -0.540643 | 0.000000 |
| F18F11.3    | cdh-8       | chrIV  | -0.540769 | 0.000047 |
| T13H2.5     | spat-3      | chrX   | -0.540887 | 0.000000 |
| F58A4.11    | gei-13      | chrIII | -0.541083 | 0.000000 |
| F52B11.3    | noah-2      | chrIV  | -0.541155 | 0.000000 |
| K04F10.8    | K04F10.8    | chrI   | -0.541209 | 0.046866 |
| F28C1.3     | F28C1.3     | chrV   | -0.542638 | 0.000000 |
| C06A1.4     | C06A1.4     | chrII  | -0.542882 | 0.000000 |
| EEED8.5     | mog-5       | chrII  | -0.543135 | 0.000000 |
| F54F3.1     | nid-1       | chrV   | -0.543299 | 0.000000 |
| F48F7.1     | alg-1       | chrX   | -0.545421 | 0.000000 |
| T04D1.4     | tag-192     | chrI   | -0.545607 | 0.000000 |
| T01B6.1     | T01B6.1     | chrX   | -0.545623 | 0.000584 |
| F23A7.3     | F23A7.3     | chrX   | -0.545638 | 0.015213 |
| R53.3       | egl-43      | chrII  | -0.545985 | 0.000051 |
| Y40B1A.3    | Y40B1A.3    | chrI   | -0.548362 | 0.000000 |
| M142.5      | M142.5      | chrIII | -0.548794 | 0.000000 |
| E02H4.2     | E02H4.2     | chrX   | -0.549467 | 0.046667 |
| F39H12.4    | igcm-1      | chrX   | -0.549797 | 0.000000 |
| F54C1.3     | mes-3       | chrI   | -0.551114 | 0.000000 |
| Y39A1B.2    | ptr-19      | chrIII | -0.551144 | 0.009465 |

|            |            |        |           |          |
|------------|------------|--------|-----------|----------|
| C03C10.5   | C03C10.5   | chrIII | -0.552315 | 0.007133 |
| W07E11.1   | W07E11.1   | chrX   | -0.552326 | 0.000000 |
| ZK1248.2   | col-74     | chrII  | -0.553185 | 0.000232 |
| F18C12.2   | rme-8      | chrI   | -0.554423 | 0.000000 |
| ZK1307.6   | fzr-1      | chrII  | -0.555643 | 0.000000 |
| F59F5.7    | F59F5.7    | chrX   | -0.556257 | 0.007828 |
| C36A4.5    | C36A4.5    | chrIII | -0.556563 | 0.000001 |
| Y57A10A.18 | pqn-87     | chrII  | -0.557609 | 0.000000 |
| F36H2.1    | tat-5      | chrI   | -0.558746 | 0.000000 |
| W01C8.3    | set-19     | chrX   | -0.559290 | 0.000000 |
| Y66D12A.19 | Y66D12A.19 | chrIII | -0.560732 | 0.000000 |
| F31D4.5    | F31D4.5    | chrV   | -0.560776 | 0.000188 |
| C42D8.3    | pnk-4      | chrX   | -0.562156 | 0.000000 |
| F23B2.12   | pcp-2      | chrIV  | -0.562722 | 0.000000 |
| ZK1067.2   | ZK1067.2   | chrII  | -0.562876 | 0.000000 |
| Y71G10AR.4 | Y71G10AR.4 | chrIV  | -0.566931 | 0.000000 |
| T21E8.3    | pgp-8      | chrX   | -0.567061 | 0.016415 |
| Y41D4B.4   | Y41D4B.4   | chrIV  | -0.567181 | 0.000000 |
| Y71G12B.11 | Y71G12B.11 | chrI   | -0.567824 | 0.000000 |
| ZK688.5    | ZK688.5    | chrIII | -0.569124 | 0.000000 |
| C09E7.7    | C09E7.7    | chrIII | -0.570413 | 0.000000 |
| C43G2.2    | bicd-1     | chrIV  | -0.570642 | 0.000000 |
| Y54G11A.13 | ctl-3      | chrII  | -0.570690 | 0.000138 |
| R06A10.2   | gsa-1      | chrI   | -0.572219 | 0.000000 |
| K08A2.5    | nhr-88     | chrII  | -0.572304 | 0.000000 |
| Y71H2AM.3  | Y71H2AM.3  | chrIII | -0.573056 | 0.000000 |
| C08G9.2    | C08G9.2    | chrIV  | -0.573234 | 0.000513 |
| Y60A3A.14  | Y60A3A.14  | chrV   | -0.574255 | 0.000000 |
| ZK617.1    | unc-22     | chrIV  | -0.574543 | 0.000000 |
| T05H10.1   | T05H10.1   | chrII  | -0.574813 | 0.000000 |
| F28B4.3    | F28B4.3    | chrX   | -0.575333 | 0.000000 |
| R07E3.6    | R07E3.6    | chrX   | -0.577067 | 0.000016 |
| C44H9.1    | ugt-15     | chrV   | -0.577311 | 0.012029 |
| C03D6.4    | npp-14     | chrI   | -0.578553 | 0.000000 |
| K08B12.5   | mrck-1     | chrV   | -0.579223 | 0.000000 |
| C18B2.6    | C18B2.6    | chrX   | -0.579606 | 0.020287 |
| F08D12.1   | F08D12.1   | chrII  | -0.581906 | 0.000000 |
| Y46G5A.13  | tiar-2     | chrII  | -0.582398 | 0.000000 |
| F21H11.2   | sax-2      | chrIII | -0.582703 | 0.000000 |
| ZK112.2    | ncl-1      | chrIII | -0.582803 | 0.000000 |
| ZC434.5    | ears-1     | chrI   | -0.582803 | 0.000000 |
| W03A5.5    | W03A5.5    | chrIII | -0.585228 | 0.000000 |
| M03A1.1    | vab-1      | chrII  | -0.586225 | 0.000000 |
| K09F5.2    | vit-1      | chrX   | -0.586876 | 0.000000 |
| Y34D9A.7   | Y34D9A.7   | chrI   | -0.587619 | 0.000000 |
| F23F12.8   | F23F12.8   | chrIII | -0.588246 | 0.005440 |
| K09F5.6    | K09F5.6    | chrX   | -0.588588 | 0.000000 |
| Y54F10AR.1 | Y54F10AR.1 | chrIII | -0.590918 | 0.000000 |
| K10C2.1    | K10C2.1    | chrX   | -0.591140 | 0.000000 |
| Y119D3B.16 | Y119D3B.16 | chrIII | -0.591788 | 0.000000 |
| Y102A5A.1  | cand-1     | chrV   | -0.593316 | 0.000000 |
| Y50D7A.3   | Y50D7A.3   | chrIII | -0.594508 | 0.000000 |
| 2L52.1     | 2L52.1     | chrII  | -0.594539 | 0.000000 |
| F29D11.1   | lrp-1      | chrI   | -0.594614 | 0.000000 |
| C09G5.8    | C09G5.8    | chrII  | -0.596463 | 0.003150 |
| C05A9.1    | pgp-5      | chrX   | -0.596816 | 0.000001 |
| T24D11.1   | tbc-4      | chrX   | -0.598177 | 0.000000 |
| C32A3.1    | sel-8      | chrIII | -0.598287 | 0.000000 |
| F36A2.13   | F36A2.13   | chrI   | -0.598696 | 0.000000 |
| C50C3.6    | prp-8      | chrIII | -0.600192 | 0.000000 |
| Y53G8AR.9  | Y53G8AR.9  | chrIII | -0.600499 | 0.000000 |
| C04A11.3   | gck-4      | chrX   | -0.601187 | 0.000000 |
| C14C10.5   | C14C10.5   | chrV   | -0.603534 | 0.000000 |

|             |             |        |           |          |
|-------------|-------------|--------|-----------|----------|
| F52E4.6     | wrt-2       | chrX   | -0.603829 | 0.000988 |
| H19M22.2    | let-805     | chrIII | -0.605632 | 0.000000 |
| W01C9.1     | W01C9.1     | chrII  | -0.605894 | 0.026896 |
| F27B3.7     | F27B3.7     | chrIII | -0.606006 | 0.000551 |
| Y75B7AL.4   | rga-4       | chrV   | -0.607918 | 0.000000 |
| Y55F3BR.7   | Y55F3BR.7   | chrIV  | -0.607960 | 0.000007 |
| Y48A6B.13   | spat-2      | chrIII | -0.607984 | 0.000000 |
| C14A11.2    | C14A11.2    | chrX   | -0.610537 | 0.011290 |
| C26B9.6     | C26B9.6     | chrX   | -0.612210 | 0.000122 |
| F32H2.5     | fasn-1      | chrI   | -0.612842 | 0.000000 |
| Y55F3BL.2   | Y55F3BL.2   | chrIV  | -0.613657 | 0.000000 |
| ZC416.1     | ZC416.1     | chrIV  | -0.613784 | 0.005784 |
| R10E11.1    | cbp-1       | chrIII | -0.613919 | 0.000000 |
| Y106G6D.5   | Y106G6D.5   | chrI   | -0.614604 | 0.000000 |
| Y57A10A.19  | rsr-2       | chrII  | -0.616651 | 0.000000 |
| B0524.6     | B0524.6     | chrIII | -0.616751 | 0.000000 |
| F36A4.7     | ama-1       | chrIV  | -0.619451 | 0.000000 |
| T08A11.1    | T08A11.1    | chrIII | -0.619639 | 0.000000 |
| Y110A2AL.9  | Y110A2AL.9  | chrII  | -0.620223 | 0.004634 |
| C46C2.1     | wnk-1       | chrIV  | -0.621311 | 0.000000 |
| ZC308.1     | gld-2       | chrI   | -0.621655 | 0.000000 |
| Y35H6.3     | Y35H6.3     | chrX   | -0.622079 | 0.009604 |
| C32F10.2    | lin-35      | chrI   | -0.622333 | 0.000000 |
| T01A4.1     | gcy-28      | chrI   | -0.624395 | 0.000000 |
| 2RSSE.1     | 2RSSE.1     | chrII  | -0.626504 | 0.000000 |
| F25G6.9     | F25G6.9     | chrV   | -0.627839 | 0.000000 |
| W01F3.3     | mlt-11      | chrV   | -0.628304 | 0.000000 |
| F49F1.6     | F49F1.6     | chrIV  | -0.630504 | 0.005653 |
| Y43H11AL.3  | pqn-85      | chrII  | -0.631404 | 0.000000 |
| Y47D3A.15   | aakb-2      | chrIII | -0.632339 | 0.000000 |
| F54A3.3     | cct-3       | chrII  | -0.632511 | 0.000000 |
| D2005.6     | D2005.6     | chrI   | -0.632753 | 0.000163 |
| Y111B2A.14  | pqn-80      | chrIII | -0.633748 | 0.000000 |
| F10G7.2     | tsn-1       | chrII  | -0.637344 | 0.000000 |
| T08G11.1    | T08G11.1    | chrI   | -0.638292 | 0.000000 |
| C25D7.3     | sdc-3       | chrV   | -0.639188 | 0.000000 |
| H20J04.4    | H20J04.4    | chrII  | -0.639830 | 0.000000 |
| C54D1.5     | lam-2       | chrX   | -0.640012 | 0.000000 |
| C34D4.14    | hecd-1      | chrIV  | -0.641097 | 0.000000 |
| Y47D3A.16   | rsks-1      | chrIII | -0.641847 | 0.000000 |
| C05C10.4    | pho-11      | chrII  | -0.646596 | 0.000000 |
| Y53F4B.13   | Y53F4B.13   | chrII  | -0.648452 | 0.000000 |
| R10F2.1     | cdh-1       | chrIII | -0.648870 | 0.000000 |
| Y110A2AL.13 | Y110A2AL.13 | chrII  | -0.649753 | 0.000000 |
| Y54G11A.1   | Y54G11A.1   | chrII  | -0.649833 | 0.000000 |
| K02H8.1     | mb1-1       | chrX   | -0.651329 | 0.000000 |
| F30A10.10   | usp-48      | chrI   | -0.655151 | 0.000000 |
| Y53F4B.21   | Y53F4B.21   | chrII  | -0.655800 | 0.000000 |
| C49H3.5     | ntl-4       | chrIV  | -0.657745 | 0.000000 |
| H34C03.2    | H34C03.2    | chrIV  | -0.657830 | 0.000000 |
| Y41C4A.4    | crh-1       | chrIII | -0.658050 | 0.000000 |
| Y39B6A.38   | reps-1      | chrV   | -0.661884 | 0.000000 |
| K04B12.1    | plx-2       | chrII  | -0.662855 | 0.000000 |
| C03C10.9    | C03C10.9    | chrIII | -0.664821 | 0.013373 |
| C10C5.2     | C10C5.2     | chrIV  | -0.665194 | 0.006354 |
| F52F12.6    | ztf-11      | chrI   | -0.665205 | 0.000000 |
| C09E7.6     | C09E7.6     | chrIII | -0.665907 | 0.000188 |
| F38E11.5    | F38E11.5    | chrIV  | -0.666420 | 0.000000 |
| C14A4.9     | C14A4.9     | chrII  | -0.666791 | 0.007111 |
| W01C9.3     | pqn-73      | chrII  | -0.669734 | 0.000000 |
| F08B1.2     | gcy-12      | chrII  | -0.670927 | 0.000000 |
| F37B12.2    | gcs-1       | chrII  | -0.671425 | 0.000000 |
| C34G6.1     | C34G6.1     | chrI   | -0.672593 | 0.000000 |

|            |            |        |           |          |
|------------|------------|--------|-----------|----------|
| Y48G8AL.10 | Y48G8AL.10 | chrI   | -0.673453 | 0.000000 |
| Y92H12A.1  | src-1      | chrI   | -0.673694 | 0.000000 |
| F25D7.3    | blmp-1     | chrI   | -0.674017 | 0.000000 |
| F54F11.2   | F54F11.2   | chrII  | -0.674069 | 0.000000 |
| C09G12.9   | tsg-101    | chrIV  | -0.675453 | 0.000000 |
| T28F12.3   | sos-1      | chrV   | -0.675780 | 0.000000 |
| T04C4.1    | T04C4.1    | chrIV  | -0.675973 | 0.000000 |
| F13D11.2   | hbl-1      | chrX   | -0.678084 | 0.000000 |
| Y48E1B.1   | ddl-2      | chrII  | -0.678188 | 0.000000 |
| C25G4.10   | C25G4.10   | chrIV  | -0.679010 | 0.000000 |
| Y111B2A.22 | ssl-1      | chrIII | -0.679320 | 0.000000 |
| C34G6.6    | noah-1     | chrI   | -0.682580 | 0.000000 |
| ZC101.1    | ZC101.1    | chrII  | -0.684053 | 0.000001 |
| F53H2.3    | F53H2.3    | chrV   | -0.684271 | 0.000000 |
| F41E6.4    | smk-1      | chrV   | -0.684705 | 0.000000 |
| Y48E1B.7   | Y48E1B.7   | chrII  | -0.684905 | 0.000000 |
| F30H5.3    | F30H5.3    | chrIII | -0.685555 | 0.000000 |
| Y49F6B.1   | cyh-1      | chrII  | -0.686388 | 0.000000 |
| W02A11.4   | uba-2      | chrI   | -0.690346 | 0.000000 |
| F52C12.4   | F52C12.4   | chrIV  | -0.691631 | 0.000000 |
| Y53F4B.18  | Y53F4B.18  | chrII  | -0.693140 | 0.000000 |
| F54B3.1    | F54B3.1    | chrII  | -0.695667 | 0.000000 |
| F31F6.3    | F31F6.3    | chrX   | -0.697087 | 0.000059 |
| Y57A10A.20 | sinh-1     | chrII  | -0.697984 | 0.000000 |
| Y56A3A.2   | Y56A3A.2   | chrIII | -0.704983 | 0.000000 |
| Y17G7B.9   | cyn-16     | chrII  | -0.705037 | 0.000000 |
| Y37D8A.17  | Y37D8A.17  | chrIII | -0.706510 | 0.000000 |
| Y51A2D.15  | Y51A2D.15  | chrV   | -0.706631 | 0.000000 |
| T04A8.7    | T04A8.7    | chrIII | -0.707142 | 0.000000 |
| W10C8.2    | pop-1      | chrI   | -0.707768 | 0.000000 |
| Y48G8AL.5  | Y48G8AL.5  | chrI   | -0.709523 | 0.000000 |
| C28H8.3    | C28H8.3    | chrIII | -0.712054 | 0.000000 |
| R193.2     | R193.2     | chrX   | -0.712070 | 0.000000 |
| F52E10.5   | ifa-3      | chrX   | -0.712224 | 0.000000 |
| Y59A8B.14  | par-4      | chrV   | -0.712621 | 0.000000 |
| M01E10.2   | dpy-1      | chrIII | -0.713235 | 0.000178 |
| Y51F10.11  | Y51F10.11  | chrI   | -0.713957 | 0.000000 |
| K09D9.2    | cyp-35A3   | chrV   | -0.715369 | 0.000000 |
| T27B7.7    | fbxa-137   | chrV   | -0.716441 | 0.035158 |
| Y39A1A.22  | Y39A1A.22  | chrIII | -0.720584 | 0.000000 |
| Y48A6C.3   | sup-35     | chrIII | -0.720980 | 0.000000 |
| Y56A3A.16  | Y56A3A.16  | chrIII | -0.721877 | 0.000000 |
| K10B3.10   | spc-1      | chrX   | -0.722939 | 0.000000 |
| Y92H12A.5  | Y92H12A.5  | chrI   | -0.723461 | 0.000000 |
| Y50D7A.2   | Y50D7A.2   | chrIII | -0.727049 | 0.000000 |
| R11A5.6    | R11A5.6    | chrI   | -0.727370 | 0.013458 |
| M01G5.5    | snf-6      | chrIII | -0.727745 | 0.000000 |
| Y53F4B.20  | Y53F4B.20  | chrII  | -0.729938 | 0.000915 |
| Y57E12B.3  | lipI-6     | chrV   | -0.731943 | 0.003303 |
| T21H8.5    | T21H8.5    | chrX   | -0.733448 | 0.000002 |
| T02G5.14   | T02G5.14   | chrII  | -0.737018 | 0.000610 |
| F54E2.2    | F54E2.2    | chrV   | -0.738108 | 0.027569 |
| R06A4.8    | agl-1      | chrII  | -0.738113 | 0.000000 |
| Y106G6G.2  | Y106G6G.2  | chrI   | -0.739427 | 0.022769 |
| Y71G12A.2  | Y71G12A.2  | chrI   | -0.739938 | 0.000000 |
| F56A3.5    | bro-1      | chrI   | -0.740820 | 0.002674 |
| R31.1      | sma-1      | chrV   | -0.741545 | 0.000000 |
| M142.6     | rle-1      | chrIII | -0.741724 | 0.000000 |
| K02F6.3    | K02F6.3    | chrII  | -0.741981 | 0.007850 |
| R05D11.1   | daf-8      | chrI   | -0.747258 | 0.000000 |
| K02F3.2    | K02F3.2    | chrIII | -0.747984 | 0.000000 |
| Y54E10A.9  | vbh-1      | chrI   | -0.748778 | 0.000000 |
| C10A4.1    | C10A4.1    | chrX   | -0.751386 | 0.003572 |



|             |             |        |           |          |
|-------------|-------------|--------|-----------|----------|
| Y59A8B.21   | Y59A8B.21   | chrV   | -0.752420 | 0.000000 |
| Y46E12BL.4  | spsb-1      | chrII  | -0.753512 | 0.000000 |
| F15B9.7     | fmi-1       | chrV   | -0.753561 | 0.000000 |
| Y39D8B.1    | mltn-7      | chrV   | -0.753758 | 0.047355 |
| F36G9.12    | oac-20      | chrV   | -0.753978 | 0.000407 |
| K07E3.1     | K07E3.1     | chrX   | -0.756924 | 0.000000 |
| H04M03.4    | glf-1       | chrIV  | -0.758966 | 0.000000 |
| T20F5.4     | T20F5.4     | chrI   | -0.761843 | 0.000000 |
| Y50D4C.4    | sqv-6       | chrV   | -0.762270 | 0.000000 |
| Y95B8A.7    | Y95B8A.7    | chrI   | -0.764846 | 0.000000 |
| F01G10.3    | ech-9       | chrIV  | -0.764944 | 0.000000 |
| Y44E3A.4    | Y44E3A.4    | chrI   | -0.766284 | 0.000000 |
| T22H9.2     | atg-9       | chrV   | -0.768463 | 0.000000 |
| Y92H12BL.4  | Y92H12BL.4  | chrI   | -0.772408 | 0.000000 |
| F28C1.2     | egl-10      | chrV   | -0.775219 | 0.000000 |
| D2092.5     | D2092.5     | chrI   | -0.775561 | 0.000000 |
| C37A2.2     | pqn-20      | chrI   | -0.775755 | 0.000000 |
| T22A3.8     | lam-3       | chrI   | -0.777531 | 0.000000 |
| Y73B3A.4    | Y73B3A.4    | chrX   | -0.778011 | 0.000000 |
| C04F6.1     | vit-5       | chrX   | -0.778291 | 0.000000 |
| F26A10.2    | F26A10.2    | chrX   | -0.781465 | 0.000000 |
| Y116A8C.26  | Y116A8C.26  | chrIV  | -0.782436 | 0.000000 |
| B0432.7     | B0432.7     | chrII  | -0.782449 | 0.000000 |
| F58E6.3     | F58E6.3     | chrV   | -0.782557 | 0.017751 |
| F57B9.2     | let-711     | chrIII | -0.782668 | 0.000000 |
| M6.3        | pha-2       | chrX   | -0.782753 | 0.003798 |
| H15N14.1    | adr-1       | chrI   | -0.784289 | 0.000000 |
| Y75B8A.6    | Y75B8A.6    | chrIII | -0.787252 | 0.000000 |
| Y108G3AL.7  | Y108G3AL.7  | chrV   | -0.788173 | 0.000000 |
| C41C4.6     | ulp-4       | chrII  | -0.788177 | 0.000000 |
| Y110A2AM.1  | Y110A2AM.1  | chrII  | -0.792385 | 0.000000 |
| F43C1.1     | F43C1.1     | chrIII | -0.799108 | 0.000623 |
| ZK112.7     | cdh-3       | chrIII | -0.803055 | 0.000000 |
| W06H3.3     | W06H3.3     | chrV   | -0.806810 | 0.000000 |
| F53A2.9     | F53A2.9     | chrIII | -0.807789 | 0.000000 |
| F14H12.1    | col-165     | chrX   | -0.811505 | 0.000000 |
| Y110A2AL.12 | Y110A2AL.12 | chrII  | -0.813220 | 0.000000 |
| F13D2.4     | F13D2.4     | chrX   | -0.813681 | 0.004011 |
| Y71G10AL.1  | Y71G10AL.1  | chrIV  | -0.814760 | 0.000000 |
| Y71G12B.13  | Y71G12B.13  | chrI   | -0.821577 | 0.000000 |
| Y106G6G.6   | Y106G6G.6   | chrI   | -0.822857 | 0.011066 |
| Y82E9BR.15  | elc-1       | chrIII | -0.825468 | 0.000000 |
| M01G5.1     | M01G5.1     | chrIII | -0.826949 | 0.000000 |
| C32A3.2     | C32A3.2     | chrIII | -0.830828 | 0.000000 |
| Y71H2AM.8   | set-27      | chrIII | -0.831010 | 0.000000 |
| Y48C3A.8    | Y48C3A.8    | chrII  | -0.832138 | 0.000000 |
| B0207.5     | B0207.5     | chrI   | -0.834232 | 0.002597 |
| R07E3.3     | cut-5       | chrX   | -0.835188 | 0.001727 |
| R04B3.1     | R04B3.1     | chrX   | -0.835828 | 0.026600 |
| Y38E10A.23  | Y38E10A.23  | chrII  | -0.837990 | 0.000000 |
| C52D10.3    | C52D10.3    | chrIV  | -0.838906 | 0.000000 |
| C18H9.3     | C18H9.3     | chrII  | -0.844475 | 0.000000 |
| Y50D4C.1    | unc-34      | chrV   | -0.847165 | 0.000000 |
| K12H6.1     | nhr-119     | chrII  | -0.848127 | 0.000000 |
| Y39A1A.5    | rabx-5      | chrIII | -0.848599 | 0.000000 |
| K11C4.3     | unc-70      | chrV   | -0.850235 | 0.000000 |
| Y48G10A.3   | Y48G10A.3   | chrI   | -0.859581 | 0.000000 |
| F36D3.5     | F36D3.5     | chrV   | -0.860770 | 0.008058 |
| Y37D8A.22   | epg-3       | chrIII | -0.862935 | 0.000000 |
| T24C4.4     | T24C4.4     | chrIII | -0.875280 | 0.002779 |
| F52F10.4    | oac-32      | chrV   | -0.876714 | 0.039925 |
| T20H12.1    | T20H12.1    | chrII  | -0.877717 | 0.010017 |
| C41D11.4    | C41D11.4    | chrI   | -0.878179 | 0.000000 |

|             |            |        |           |          |
|-------------|------------|--------|-----------|----------|
| ZK783.1     | fbn-1      | chrIII | -0.878923 | 0.000000 |
| Y94H6A.11   | egrh-3     | chrIV  | -0.879853 | 0.000000 |
| C02B4.1     | adt-1      | chrX   | -0.882200 | 0.000000 |
| ZK742.1     | xpo-1      | chrV   | -0.882664 | 0.000000 |
| Y38C1AA.8   | Y38C1AA.8  | chrIV  | -0.884012 | 0.000039 |
| Y54G2A.27   | Y54G2A.27  | chrIV  | -0.884274 | 0.000000 |
| T23F1.5     | T23F1.5    | chrV   | -0.885351 | 0.000066 |
| Y111B2A.19  | Y111B2A.19 | chrIII | -0.905023 | 0.000000 |
| Y39G10AR.17 | sydn-1     | chrI   | -0.906825 | 0.000000 |
| Y80D3A.2    | emb-4      | chrV   | -0.908094 | 0.000000 |
| C06G1.6     | C06G1.6    | chrX   | -0.909810 | 0.000000 |
| C38D4.8     | arl-6      | chrIII | -0.909922 | 0.032272 |
| F54E4.2     | F54E4.2    | chrX   | -0.912902 | 0.000024 |
| Y76B12C.2   | xpc-1      | chrIV  | -0.913596 | 0.000000 |
| Y48C3A.12   | Y48C3A.12  | chrII  | -0.914360 | 0.000000 |
| W06H8.6     | W06H8.6    | chrV   | -0.914509 | 0.000000 |
| H05C05.1    | H05C05.1   | chrIII | -0.922591 | 0.000000 |
| F43D9.1     | F43D9.1    | chrIII | -0.930185 | 0.000000 |
| T22B7.7     | T22B7.7    | chrX   | -0.933592 | 0.000000 |
| F55G1.4     | rod-1      | chrIV  | -0.933855 | 0.000000 |
| F57F4.3     | gfi-1      | chrV   | -0.933931 | 0.000000 |
| H37N21.1    | H37N21.1   | chrI   | -0.934501 | 0.000000 |
| F52F10.3    | oac-31     | chrV   | -0.935796 | 0.026066 |
| K01D12.1    | K01D12.1   | chrV   | -0.939852 | 0.002784 |
| K03E5.3     | cdk-2      | chrI   | -0.940790 | 0.000000 |
| K08H10.1    | lea-1      | chrV   | -0.940984 | 0.000000 |
| T08H4.2     | T08H4.2    | chrII  | -0.943663 | 0.000009 |
| C11H1.8     | C11H1.8    | chrX   | -0.943773 | 0.000000 |
| Y39A1C.4    | hex-3      | chrIII | -0.945397 | 0.000000 |
| ZK858.1     | gld-4      | chrI   | -0.945996 | 0.000000 |
| F22B5.3     | cut-3      | chrII  | -0.946786 | 0.000000 |
| C26C6.5     | dcp-66     | chrI   | -0.951845 | 0.000000 |
| W03G1.7     | asm-3      | chrIV  | -0.952824 | 0.000000 |
| Y50D7A.4    | Y50D7A.4   | chrIII | -0.953353 | 0.000000 |
| R166.5      | mnk-1      | chrII  | -0.954389 | 0.000000 |
| Y92H12A.4   | Y92H12A.4  | chrI   | -0.954679 | 0.000000 |
| D2045.2     | D2045.2    | chrIII | -0.955244 | 0.000000 |
| E01G4.1     | tbc-14     | chrII  | -0.962096 | 0.000000 |
| T21E8.1     | pgp-6      | chrX   | -0.963985 | 0.000000 |
| Y104H12BR.1 | plst-1     | chrIV  | -0.965168 | 0.000000 |
| Y40B1A.2    | Y40B1A.2   | chrI   | -0.969307 | 0.000000 |
| T24B8.7     | T24B8.7    | chrII  | -0.973944 | 0.000000 |
| M03C11.3    | M03C11.3   | chrIII | -0.974374 | 0.000000 |
| Y54F10BM.1  | Y54F10BM.1 | chrIII | -0.974434 | 0.000000 |
| Y39B6A.14   | pro-3      | chrV   | -0.975732 | 0.000000 |
| ZK112.3     | ZK112.3    | chrIII | -0.978368 | 0.003159 |
| ZC317.7     | ZC317.7    | chrV   | -0.986434 | 0.000000 |
| F58D5.5     | F58D5.5    | chrI   | -0.987877 | 0.000000 |
| K02B7.4     | K02B7.4    | chrII  | -0.988846 | 0.000000 |
| Y48C3A.20   | Y48C3A.20  | chrII  | -0.991044 | 0.000000 |
| Y51H1A.2    | Y51H1A.2   | chrII  | -0.992860 | 0.000000 |
| F31F6.1     | F31F6.1    | chrX   | -1.007592 | 0.000000 |
| Y95B8A.5    | gpa-16     | chrI   | -1.009556 | 0.000000 |
| C46A5.4     | C46A5.4    | chrIV  | -1.011959 | 0.000040 |
| C12C8.3     | lin-41     | chrI   | -1.012305 | 0.000000 |
| Y105E8A.22  | exc-4      | chrI   | -1.016109 | 0.000000 |
| Y110A2AR.2  | ubc-15     | chrII  | -1.017188 | 0.000000 |
| Y92H12BM.1  | Y92H12BM.1 | chrI   | -1.027257 | 0.000000 |
| Y54G2A.28   | Y54G2A.28  | chrIV  | -1.031572 | 0.000000 |
| Y38C1BA.1   | Y38C1BA.1  | chrIV  | -1.037331 | 0.000001 |
| C29A12.6    | C29A12.6   | chrV   | -1.038361 | 0.000461 |
| C17D12.2    | unc-75     | chrI   | -1.039907 | 0.000000 |
| C40D2.2     | math-20    | chrII  | -1.040663 | 0.035381 |

|             |            |        |           |          |
|-------------|------------|--------|-----------|----------|
| W03A5.6     | W03A5.6    | chrIII | -1.042576 | 0.000000 |
| M03A1.6     | ipla-1     | chrII  | -1.043885 | 0.004988 |
| T08D2.1     | T08D2.1    | chrX   | -1.045645 | 0.001893 |
| Y54F10AM.10 | rbc-2      | chrIII | -1.046837 | 0.000000 |
| Y82E9BR.19  | Y82E9BR.19 | chrIII | -1.049862 | 0.000000 |
| F45E4.7     | F45E4.7    | chrIV  | -1.050058 | 0.000038 |
| F55F1.3     | F55F1.3    | chrX   | -1.051834 | 0.005780 |
| ZC84.6      | ZC84.6     | chrIII | -1.054915 | 0.000000 |
| ZC84.1      | ZC84.1     | chrIII | -1.060518 | 0.000001 |
| Y55D5A.5    | daf-2      | chrIII | -1.062112 | 0.000000 |
| ZK816.5     | dhs-26     | chrX   | -1.066884 | 0.000000 |
| C05D11.8    | C05D11.8   | chrIII | -1.072908 | 0.000000 |
| W02H5.2     | W02H5.2    | chrV   | -1.077511 | 0.000000 |
| Y39G8C.1    | xrn-1      | chrII  | -1.081605 | 0.000000 |
| Y9C9A.16    | Y9C9A.16   | chrIV  | -1.101408 | 0.000489 |
| Y6B3B.4     | Y6B3B.4    | chrI   | -1.102362 | 0.000000 |
| K10E9.1     | K10E9.1    | chrI   | -1.103560 | 0.000000 |
| K01A11.3    | K01A11.3   | chrIII | -1.103616 | 0.009060 |
| Y39A3CR.3   | Y39A3CR.3  | chrIII | -1.109474 | 0.000000 |
| Y92H12BR.7  | Y92H12BR.7 | chrI   | -1.111334 | 0.000000 |
| Y111B2A.9   | Y111B2A.9  | chrIII | -1.127945 | 0.000000 |
| H06O01.4    | H06O01.4   | chrI   | -1.135755 | 0.042144 |
| K09B11.1    | pik-1      | chrIV  | -1.138618 | 0.000000 |
| F48B9.1     | F48B9.1    | chrX   | -1.142557 | 0.000004 |
| Y20F4.3     | gap-3      | chrI   | -1.147257 | 0.000000 |
| Y37E11AL.6  | Y37E11AL.6 | chrIV  | -1.149236 | 0.000038 |
| F54D12.6    | rog-1      | chrII  | -1.152063 | 0.000000 |
| Y54G2A.1    | lin-22     | chrIV  | -1.156664 | 0.002060 |
| Y50D4C.5    | Y50D4C.5   | chrV   | -1.167104 | 0.000000 |
| Y48A6B.10   | Y48A6B.10  | chrIII | -1.173893 | 0.000000 |
| Y71H2AM.19  | laf-1      | chrIII | -1.183895 | 0.000000 |
| C24A8.3     | pqn-15     | chrX   | -1.192137 | 0.000000 |
| K07A9.3     | K07A9.3    | chrIV  | -1.212105 | 0.001222 |
| R05D3.12    | R05D3.12   | chrIII | -1.214528 | 0.000000 |
| C56C10.12   | epg-5      | chrII  | -1.217055 | 0.000000 |
| F55F1.5     | F55F1.5    | chrX   | -1.232416 | 0.000489 |
| F59A2.2     | F59A2.2    | chrIII | -1.239155 | 0.000000 |
| F20G4.2     | F20G4.2    | chrI   | -1.240005 | 0.000000 |
| C16D6.1     | C16D6.1    | chrX   | -1.245966 | 0.020674 |
| Y48G8AL.6   | smg-2      | chrI   | -1.250806 | 0.000000 |
| R09E10.5    | R09E10.5   | chrIV  | -1.258154 | 0.000000 |
| R13A1.3     | R13A1.3    | chrIV  | -1.261492 | 0.000001 |
| ZK1193.4    | ZK1193.4   | chrX   | -1.262346 | 0.000000 |
| Y50D7A.11   | Y50D7A.11  | chrIII | -1.278592 | 0.000000 |
| Y38F2AR.5   | Y38F2AR.5  | chrIV  | -1.287292 | 0.000000 |
| C09F9.2     | C09F9.2    | chrII  | -1.291837 | 0.000000 |
| C56E6.9     | C56E6.9    | chrII  | -1.292931 | 0.000000 |
| VY35H6BL.2  | VY35H6BL.2 | chrX   | -1.296255 | 0.005794 |
| R08E3.2     | R08E3.2    | chrX   | -1.297578 | 0.000000 |
| Y38F2AR.6   | Y38F2AR.6  | chrIV  | -1.308768 | 0.000000 |
| C34E11.7    | C34E11.7   | chrX   | -1.309310 | 0.013242 |
| W03F8.5     | lam-1      | chrIV  | -1.316190 | 0.000000 |
| ZK669.7     | ZK669.7    | chrII  | -1.335315 | 0.000495 |
| Y67D8A.2    | Y67D8A.2   | chrIV  | -1.336993 | 0.000000 |
| C10C5.1     | C10C5.1    | chrIV  | -1.339246 | 0.000000 |
| Y38C1AB.8   | frm-5      | chrIV  | -1.349497 | 0.000000 |
| Y73E7A.9    | adpr-1     | chrI   | -1.351297 | 0.000000 |
| Y48G1C.10   | Y48G1C.10  | chrI   | -1.378278 | 0.000000 |
| Y46D2A.2    | Y46D2A.2   | chrII  | -1.386344 | 0.000849 |
| F56E10.1    | F56E10.1   | chrV   | -1.388989 | 0.000000 |
| H08J11.2    | H08J11.2   | chrX   | -1.390441 | 0.000000 |
| F54E2.4     | F54E2.4    | chrV   | -1.413352 | 0.000004 |
| Y47G6A.29   | Y47G6A.29  | chrI   | -1.420351 | 0.000000 |

|            |            |       |           |          |
|------------|------------|-------|-----------|----------|
| F28B3.4    | F28B3.4    | chrI  | -1.433385 | 0.000000 |
| ZK1193.3   | ZK1193.3   | chrX  | -1.435825 | 0.000000 |
| Y48G1C.8   | Y48G1C.8   | chrI  | -1.468255 | 0.000000 |
| Y69A2AR.17 | Y69A2AR.17 | chrIV | -1.503668 | 0.000000 |
| C34C6.2    | C34C6.2    | chrII | -1.543587 | 0.000000 |
| F21F12.1   | F21F12.1   | chrI  | -1.546028 | 0.038005 |
| K03H4.2    | K03H4.2    | chrV  | -1.563051 | 0.000000 |
| F56C11.4   | F56C11.4   | chrI  | -1.568943 | 0.000000 |
| F47C12.1   | F47C12.1   | chrIV | -1.611334 | 0.000000 |
| C25H3.11   | C25H3.11   | chrII | -1.665893 | 0.000000 |
| C09H10.7   | C09H10.7   | chrII | -1.730221 | 0.000000 |
| Y105E8A.29 | Y105E8A.29 | chrI  | -1.759648 | 0.000000 |
| Y105E8A.25 | Y105E8A.25 | chrI  | -1.764661 | 0.000000 |
| F48C1.4    | F48C1.4    | chrI  | -1.846197 | 0.000000 |
| B0511.14   | B0511.14   | chrI  | -1.909144 | 0.000000 |
| ZK1067.8   | ZK1067.8   | chrII | -1.938165 | 0.000000 |
| F47C12.2   | clcc-78    | chrIV | -1.945084 | 0.000000 |
| C44E4.2    | C44E4.2    | chrI  | -1.995689 | 0.000000 |
| C44E4.7    | C44E4.7    | chrI  | -2.107873 | 0.000000 |

---

**Supplemental Table 4: Differentially Expressed RNAs After 5 days Rotenone Treatment**

| <b>Ensembl Gene Id</b> | <b>Gene Symbol</b> | <b>Chromosome</b> | <b>log2 Fold Change</b> | <b>P-Value</b> |
|------------------------|--------------------|-------------------|-------------------------|----------------|
| F31C3.9                | rrn-3.1            | chrI              | 3.158803                | 0.000000       |
| F31C3.10               | rrn-3.56           | chrI              | 2.956425                | 0.000000       |
| F49E12.2               | dod-23             | chrII             | 1.417238                | 0.000000       |
| CE7X_3.1               | CE7X_3.1           | chrX              | 1.295104                | 0.002587       |
| Y54G2A.8               | clec-82            | chrIV             | 1.294421                | 0.000000       |
| F31C3.11               | rrn-2.1            | chrI              | 1.115618                | 0.000000       |
| F59A7.1                | clec-206           | chrV              | 0.983588                | 0.006240       |
| W07A12.6               | oac-54             | chrII             | 0.979910                | 0.000006       |
| F41C3.1                | F41C3.1            | chrII             | 0.978962                | 0.022267       |
| F41E6.15               | F41E6.15           | chrV              | 0.840893                | 0.033402       |
| W07B8.5                | cpr-5              | chrV              | 0.802430                | 0.000006       |
| F07H5.9                | pho-13             | chrII             | 0.795221                | 0.000664       |
| C49F5.9                | C49F5.9            | chrX              | 0.790743                | 0.042857       |
| T05E12.7               | T05E12.7           | chrV              | 0.747007                | 0.000710       |
| R09A1.5                | R09A1.5            | chrV              | 0.701058                | 0.009262       |
| Y75B7AR.1              | Y75B7AR.1          | chrV              | 0.699757                | 0.013279       |
| F46C5.1                | F46C5.1            | chrII             | 0.698762                | 0.002931       |
| F09C8.1                | F09C8.1            | chrX              | 0.688103                | 0.000633       |
| C40H1.8                | C40H1.8            | chrIII            | 0.676970                | 0.004752       |
| F11G11.10              | col-17             | chrII             | 0.655067                | 0.001333       |
| ZC247.1                | ZC247.1            | chrI              | 0.653898                | 0.002164       |
| T01B7.7                | rol-6              | chrII             | 0.629758                | 0.004302       |
| C33C12.8               | C33C12.8           | chrII             | 0.622740                | 0.001627       |
| W05B2.5                | col-93             | chrIII            | 0.616955                | 0.033075       |
| T05E12.3               | T05E12.3           | chrV              | 0.605815                | 0.002587       |
| F35C5.9                | clec-66            | chrII             | 0.596420                | 0.006401       |
| Y73C8C.2               | clec-210           | chrV              | 0.580088                | 0.007842       |
| F49E12.9               | F49E12.9           | chrII             | 0.572809                | 0.006818       |
| F57F4.4                | F57F4.4            | chrV              | 0.549091                | 0.008177       |
| T10B9.7                | cyp-13A2           | chrII             | 0.546681                | 0.044056       |
| Y4C6B.6                | Y4C6B.6            | chrIV             | 0.534261                | 0.039424       |
| B0491.2                | sqt-1              | chrII             | 0.522793                | 0.022953       |
| C32H11.4               | C32H11.4           | chrIV             | 0.508592                | 0.021863       |
| C29E4.1                | col-90             | chrIII            | 0.479079                | 0.046000       |
| F11G11.11              | col-20             | chrII             | 0.471798                | 0.035993       |
| Y39B6A.1               | Y39B6A.1           | chrV              | 0.465963                | 0.037354       |
| F23D12.11              | F23D12.11          | chrX              | -0.450401               | 0.048792       |
| Y47D7A.1               | skr-7              | chrV              | -0.452780               | 0.048935       |
| F49E11.10              | scl-2              | chrIV             | -0.453457               | 0.044842       |
| C39D10.7               | C39D10.7           | chrX              | -0.453702               | 0.043068       |
| R11F4.1                | R11F4.1            | chrII             | -0.454193               | 0.049914       |
| Y105C5B.28             | gln-3              | chrIV             | -0.454897               | 0.044339       |
| F19H8.1                | tps-2              | chrII             | -0.457833               | 0.047731       |
| T28F4.5                | T28F4.5            | chrI              | -0.462737               | 0.038893       |
| F55B11.2               | F55B11.2           | chrIV             | -0.463338               | 0.039769       |
| F40F8.5                | F40F8.5            | chrII             | -0.464100               | 0.039725       |
| K11C4.4                | odc-1              | chrV              | -0.464810               | 0.044734       |
| F58B3.9                | ttr-50             | chrIV             | -0.465062               | 0.039392       |
| W03G1.7                | asm-3              | chrIV             | -0.465675               | 0.040743       |
| T13B5.3                | pho-14             | chrII             | -0.468945               | 0.037972       |
| T19D12.4               | T19D12.4           | chrII             | -0.469027               | 0.044717       |
| F21C10.10              | F21C10.10          | chrV              | -0.470042               | 0.042367       |
| E01G4.1                | tbc-14             | chrII             | -0.474066               | 0.035993       |
| B0365.6                | clec-41            | chrV              | -0.474356               | 0.030473       |
| F45D3.4                | F45D3.4            | chrV              | -0.479051               | 0.028612       |
| F56D6.9                | F56D6.9            | chrIV             | -0.481369               | 0.039594       |
| E04F6.9                | E04F6.9            | chrII             | -0.483843               | 0.028620       |
| JC8.14                 | ttr-45             | chrIV             | -0.484449               | 0.026099       |
| ZK1073.1               | ZK1073.1           | chrX              | -0.485338               | 0.039725       |
| C54F6.14               | ftn-1              | chrV              | -0.487645               | 0.026047       |

|             |             |        |           |          |
|-------------|-------------|--------|-----------|----------|
| K07C6.4     | cyp-35B1    | chrV   | -0.487962 | 0.028612 |
| R07B1.10    | lec-8       | chrX   | -0.490204 | 0.024071 |
| ZK550.2     | ZK550.2     | chrIV  | -0.491778 | 0.038581 |
| C31H5.6     | C31H5.6     | chrI   | -0.492000 | 0.037208 |
| W03F8.5     | lam-1       | chrIV  | -0.493127 | 0.026343 |
| Y105E8A.29  | Y105E8A.29  | chrI   | -0.494377 | 0.035818 |
| T14G8.1     | chd-3       | chrX   | -0.496915 | 0.022443 |
| F47E1.2     | F47E1.2     | chrX   | -0.497662 | 0.039594 |
| F10E9.12    | F10E9.12    | chrIII | -0.497723 | 0.044074 |
| Y39G10AR.11 | Y39G10AR.11 | chrI   | -0.498948 | 0.023616 |
| C40H1.5     | ttr-5       | chrIII | -0.501009 | 0.031972 |
| ZK430.5     | ZK430.5     | chrII  | -0.501157 | 0.046000 |
| W07E11.1    | W07E11.1    | chrX   | -0.501976 | 0.018790 |
| Y57G11C.10  | gdi-1       | chrIV  | -0.502519 | 0.018777 |
| F28D1.2     | F28D1.2     | chrIV  | -0.502741 | 0.023703 |
| B0281.5     | B0281.5     | chrII  | -0.503439 | 0.035285 |
| Y69A2AL.2   | Y69A2AL.2   | chrIV  | -0.506618 | 0.035818 |
| C07D10.5    | C07D10.5    | chrII  | -0.506934 | 0.026156 |
| C07E3.3     | C07E3.3     | chrII  | -0.507175 | 0.041566 |
| K08H2.1     | skr-21      | chrX   | -0.507272 | 0.041725 |
| F58A3.2     | egl-15      | chrX   | -0.508406 | 0.042640 |
| F13C5.2     | F13C5.2     | chrX   | -0.508904 | 0.022443 |
| K08C7.5     | fmo-2       | chrIV  | -0.509058 | 0.024036 |
| C35E7.1     | vet-2       | chrI   | -0.509543 | 0.019420 |
| C18E3.7     | ppw-1       | chrI   | -0.509649 | 0.028707 |
| K08A8.2     | sox-2       | chrX   | -0.510093 | 0.042367 |
| Y51A2D.11   | ttr-26      | chrV   | -0.511720 | 0.021786 |
| Y105E8A.25  | Y105E8A.25  | chrI   | -0.513244 | 0.029787 |
| K05B2.3     | ifa-4       | chrX   | -0.513369 | 0.030262 |
| Y69A2AR.17  | Y69A2AR.17  | chrIV  | -0.516739 | 0.035773 |
| Y75B8A.3    | Y75B8A.3    | chrIII | -0.516986 | 0.026099 |
| C25A8.4     | C25A8.4     | chrIV  | -0.517138 | 0.013021 |
| ZK1193.3    | ZK1193.3    | chrX   | -0.517314 | 0.042640 |
| F11A6.1     | kpc-1       | chrI   | -0.521193 | 0.021856 |
| T12A7.2     | T12A7.2     | chrIV  | -0.522192 | 0.042857 |
| C08A9.10    | C08A9.10    | chrX   | -0.522219 | 0.018256 |
| F44B9.1     | dpf-6       | chrIII | -0.523437 | 0.037108 |
| ZK970.7     | ZK970.7     | chrII  | -0.524396 | 0.020015 |
| Y5F2A.2     | ttr-17      | chrIV  | -0.524455 | 0.022443 |
| T05A7.4     | hmg-11      | chrII  | -0.524511 | 0.018864 |
| F33E2.5     | F33E2.5     | chrI   | -0.525048 | 0.042857 |
| C05B5.8     | C05B5.8     | chrIII | -0.526489 | 0.030473 |
| F53H2.2     | cnc-7       | chrV   | -0.528387 | 0.028654 |
| F21C10.11   | F21C10.11   | chrV   | -0.529453 | 0.046680 |
| F15E6.4     | F15E6.4     | chrIV  | -0.530606 | 0.021729 |
| ZK512.3     | ced-11      | chrIII | -0.531078 | 0.035285 |
| F44F4.4     | ptr-8       | chrII  | -0.531446 | 0.021085 |
| Y73B6BL.9   | hil-2       | chrIV  | -0.533862 | 0.010580 |
| W04A8.4     | W04A8.4     | chrI   | -0.534808 | 0.018790 |
| F55B11.4    | F55B11.4    | chrIV  | -0.535099 | 0.017204 |
| C56C10.12   | epg-5       | chrII  | -0.535516 | 0.012711 |
| F48C1.4     | F48C1.4     | chrI   | -0.537240 | 0.021856 |
| F14H12.1    | col-165     | chrX   | -0.537535 | 0.042857 |
| B0213.3     | nlp-28      | chrV   | -0.539684 | 0.016715 |
| B0454.6     | B0454.6     | chrII  | -0.542160 | 0.026667 |
| Y32F6B.1    | Y32F6B.1    | chrV   | -0.542434 | 0.022267 |
| ZK1193.4    | ZK1193.4    | chrX   | -0.542641 | 0.044339 |
| F08F3.7     | cyp-14A5    | chrV   | -0.543051 | 0.023376 |
| F15A4.6     | F15A4.6     | chrII  | -0.544497 | 0.020015 |
| F26G1.2     | F26G1.2     | chrII  | -0.544671 | 0.019850 |
| W03A5.7     | dnj-24      | chrIII | -0.544688 | 0.029266 |
| JC8.8       | ttr-51      | chrIV  | -0.544925 | 0.008739 |
| F21H7.1     | gst-22      | chrV   | -0.545689 | 0.024506 |

|            |            |        |           |          |
|------------|------------|--------|-----------|----------|
| K11G12.1   | nas-11     | chrX   | -0.547485 | 0.008045 |
| B0213.4    | nlp-29     | chrV   | -0.549426 | 0.010004 |
| C46F4.2    | acs-17     | chrX   | -0.549963 | 0.010386 |
| C29E6.1    | let-653    | chrIV  | -0.549984 | 0.029787 |
| C10C5.1    | C10C5.1    | chrIV  | -0.550365 | 0.009321 |
| F53C3.2    | fbxb-103   | chrII  | -0.550578 | 0.039727 |
| Y39G10AL.1 | Y39G10AL.1 | chrI   | -0.550810 | 0.024071 |
| F08D12.10  | sdz-9      | chrII  | -0.552413 | 0.048792 |
| C34G6.2    | tyr-4      | chrI   | -0.553586 | 0.006767 |
| F18G5.2    | pes-8      | chrX   | -0.554253 | 0.045907 |
| F20C5.6    | F20C5.6    | chrIV  | -0.554732 | 0.019935 |
| F52F12.6   | ztf-11     | chrI   | -0.554873 | 0.009510 |
| F56D6.8    | F56D6.8    | chrIV  | -0.555219 | 0.008431 |
| M199.4     | clcc-190   | chrIV  | -0.555387 | 0.007935 |
| F53H4.2    | F53H4.2    | chrX   | -0.555613 | 0.007213 |
| Y40B10A.6  | Y40B10A.6  | chrV   | -0.556593 | 0.023616 |
| ZK1010.7   | col-97     | chrIII | -0.556785 | 0.031800 |
| F54F3.3    | lipl-1     | chrV   | -0.556906 | 0.008739 |
| C02A12.4   | lys-7      | chrV   | -0.557111 | 0.005644 |
| F35E12.5   | F35E12.5   | chrV   | -0.557329 | 0.006767 |
| R11.4      | R11.4      | chrX   | -0.557567 | 0.022753 |
| T27A10.6   | T27A10.6   | chrX   | -0.558371 | 0.033402 |
| T05E7.5    | vet-1      | chrI   | -0.559278 | 0.007685 |
| F41F3.4    | col-139    | chrV   | -0.560125 | 0.034041 |
| C52D10.9   | skr-8      | chrIV  | -0.560454 | 0.018334 |
| F41E7.1    | F41E7.1    | chrX   | -0.561041 | 0.012799 |
| Y46G5A.7   | Y46G5A.7   | chrII  | -0.562302 | 0.049099 |
| B0403.3    | B0403.3    | chrX   | -0.562994 | 0.029717 |
| C09F9.3    | glna-1     | chrII  | -0.563589 | 0.028473 |
| D1086.6    | D1086.6    | chrV   | -0.565508 | 0.010293 |
| C52D10.6   | skr-12     | chrIV  | -0.566031 | 0.029643 |
| C53A3.2    | C53A3.2    | chrV   | -0.566198 | 0.008636 |
| T23F11.6   | T23F11.6   | chrIII | -0.567830 | 0.026729 |
| ZC250.4    | ZC250.4    | chrV   | -0.569168 | 0.012272 |
| C09H5.2    | catp-3     | chrV   | -0.569921 | 0.004773 |
| F42A10.7   | F42A10.7   | chrIII | -0.571285 | 0.006429 |
| K02D7.5    | K02D7.5    | chrIV  | -0.571868 | 0.018790 |
| F22H10.2   | F22H10.2   | chrX   | -0.572698 | 0.022049 |
| T20G5.7    | dod-6      | chrIII | -0.573659 | 0.004773 |
| F42E11.1   | pqp-4      | chrX   | -0.573791 | 0.008260 |
| W09G12.7   | W09G12.7   | chrIV  | -0.574621 | 0.025040 |
| M01E5.6    | sepa-1     | chrI   | -0.574985 | 0.005313 |
| F19H8.4    | mltn-9     | chrII  | -0.575234 | 0.010385 |
| F38A3.1    | col-81     | chrII  | -0.575367 | 0.033075 |
| ZK783.1    | fbn-1      | chrIII | -0.576834 | 0.012706 |
| B0218.2    | faah-2     | chrIV  | -0.577133 | 0.005644 |
| F54D12.6   | rog-1      | chrII  | -0.578799 | 0.044377 |
| Y53F4B.28  | ptr-20     | chrII  | -0.579274 | 0.010004 |
| F12E12.10  | fbxb-90    | chrII  | -0.579938 | 0.043068 |
| C08E8.4    | C08E8.4    | chrV   | -0.582404 | 0.010858 |
| Y80D3A.7   | ptr-22     | chrV   | -0.583977 | 0.007685 |
| B0457.6    | B0457.6    | chrII  | -0.586315 | 0.022267 |
| W04A8.5    | W04A8.5    | chrI   | -0.586543 | 0.022267 |
| F56A6.1    | sago-2     | chrI   | -0.586793 | 0.008842 |
| C07A9.8    | C07A9.8    | chrIII | -0.587337 | 0.025040 |
| T19B10.5   | T19B10.5   | chrV   | -0.587642 | 0.009262 |
| C34C6.7    | C34C6.7    | chrII  | -0.589081 | 0.008775 |
| T25B2.2    | T25B2.2    | chrX   | -0.592756 | 0.023924 |
| F41G3.10   | F41G3.10   | chrII  | -0.594416 | 0.007228 |
| B0252.2    | asm-1      | chrII  | -0.594799 | 0.016405 |
| F41E7.4    | fip-5      | chrX   | -0.595189 | 0.010580 |
| F46B6.8    | lipl-2     | chrV   | -0.595304 | 0.005424 |
| ZK1290.5   | ZK1290.5   | chrII  | -0.596283 | 0.006295 |

|            |           |        |           |          |
|------------|-----------|--------|-----------|----------|
| R02C2.2    | kin-34    | chrV   | -0.597812 | 0.020015 |
| Y51A2D.4   | hmit-1.1  | chrV   | -0.598081 | 0.007906 |
| F54F7.3    | F54F7.3   | chrX   | -0.599014 | 0.004958 |
| R09B5.9    | cnc-4     | chrV   | -0.599809 | 0.004237 |
| ZC373.1    | ZC373.1   | chrX   | -0.601407 | 0.004773 |
| K08H10.1   | lea-1     | chrV   | -0.602358 | 0.001943 |
| T10H4.11   | cyp-34A2  | chrV   | -0.603080 | 0.004525 |
| C53D6.7    | C53D6.7   | chrIV  | -0.604527 | 0.016405 |
| F21E9.3    | ttr-37    | chrX   | -0.605997 | 0.035874 |
| Y5H2B.3    | Y5H2B.3   | chrV   | -0.607340 | 0.006767 |
| ZK337.1    | tep-1     | chrI   | -0.608006 | 0.002016 |
| C03G6.5    | C03G6.5   | chrV   | -0.612511 | 0.042367 |
| C52D10.3   | C52D10.3  | chrIV  | -0.614217 | 0.008431 |
| ZC239.21   | ZC239.21  | chrII  | -0.614599 | 0.047739 |
| C44E12.1   | C44E12.1  | chrX   | -0.614905 | 0.040743 |
| C44E4.2    | C44E4.2   | chrI   | -0.616057 | 0.004164 |
| C44E4.7    | C44E4.7   | chrI   | -0.616372 | 0.001776 |
| C24A8.3    | pqn-15    | chrX   | -0.618012 | 0.002350 |
| C54C6.7    | C54C6.7   | chrIII | -0.620453 | 0.027206 |
| W01C9.3    | pqn-73    | chrII  | -0.621465 | 0.043114 |
| R09B5.3    | cnc-2     | chrV   | -0.621523 | 0.003482 |
| Y71F9AL.7  | Y71F9AL.7 | chrI   | -0.621929 | 0.007842 |
| Y41G9A.10  | Y41G9A.10 | chrX   | -0.622058 | 0.006767 |
| T12A7.4    | lips-5    | chrIV  | -0.622533 | 0.020282 |
| C35E7.3    | C35E7.3   | chrI   | -0.622781 | 0.021101 |
| F41C3.2    | F41C3.2   | chrII  | -0.622841 | 0.012416 |
| K05F6.4    | K05F6.4   | chrII  | -0.623457 | 0.018334 |
| F15E6.3    | F15E6.3   | chrIV  | -0.624428 | 0.001516 |
| Y46E12A.4  | tbx-43    | chrIII | -0.626219 | 0.011478 |
| T14D7.2    | oac-46    | chrII  | -0.628973 | 0.003100 |
| F08C6.4    | sto-1     | chrX   | -0.629110 | 0.002587 |
| R04A9.7    | R04A9.7   | chrX   | -0.630291 | 0.026729 |
| R10E4.2    | tag-310   | chrIII | -0.631278 | 0.001047 |
| F22F1.1    | hil-3     | chrX   | -0.631723 | 0.002016 |
| ZK938.2    | arrd-4    | chrII  | -0.633559 | 0.016493 |
| F53A9.1    | F53A9.1   | chrX   | -0.634393 | 0.023376 |
| C54C8.12   | C54C8.12  | chrI   | -0.636641 | 0.004603 |
| T05D4.2    | T05D4.2   | chrIII | -0.638533 | 0.003871 |
| T01B11.5   | T01B11.5  | chrIV  | -0.639071 | 0.003496 |
| C25G4.10   | C25G4.10  | chrIV  | -0.640512 | 0.001051 |
| R10D12.1   | R10D12.1  | chrV   | -0.642716 | 0.026156 |
| Y54G11A.13 | ctl-3     | chrII  | -0.644544 | 0.003084 |
| K11G9.6    | mtl-1     | chrV   | -0.645140 | 0.000763 |
| T24C4.2    | T24C4.2   | chrIII | -0.645801 | 0.001840 |
| F31F6.6    | nac-1     | chrX   | -0.645975 | 0.036840 |
| C53D6.2    | unc-129   | chrIV  | -0.646465 | 0.005231 |
| Y55B1BR.3  | Y55B1BR.3 | chrIII | -0.653553 | 0.000893 |
| C27B7.7    | C27B7.7   | chrIV  | -0.653930 | 0.012351 |
| Y116A8C.3  | Y116A8C.3 | chrIV  | -0.655195 | 0.028345 |
| C09H10.7   | C09H10.7  | chrII  | -0.656736 | 0.000936 |
| F14B6.1    | sdz-14    | chrI   | -0.658803 | 0.003551 |
| Y42H9AR.5  | Y42H9AR.5 | chrIV  | -0.661788 | 0.042257 |
| T05H10.3   | T05H10.3  | chrII  | -0.661857 | 0.033186 |
| Y48E1B.16  | clcc-145  | chrII  | -0.662636 | 0.009539 |
| M02D8.4    | asns-2    | chrX   | -0.663556 | 0.000387 |
| BE10.3     | BE10.3    | chrIII | -0.663694 | 0.023376 |
| F47B8.8    | F47B8.8   | chrV   | -0.664021 | 0.027419 |
| Y47D3A.12  | tbx-37    | chrIII | -0.666808 | 0.019221 |
| F48E3.6    | F48E3.6   | chrX   | -0.669496 | 0.022795 |
| B0462.3    | fbxb-119  | chrV   | -0.673624 | 0.004773 |
| W09G12.1   | dsl-2     | chrIV  | -0.674787 | 0.000555 |
| C54C8.9    | nlp-39    | chrI   | -0.674813 | 0.001034 |
| M163.3     | his-24    | chrX   | -0.675059 | 0.000427 |



|             |           |        |           |          |
|-------------|-----------|--------|-----------|----------|
| F40H6.4     | tbx-11    | chrIII | -0.675648 | 0.001101 |
| R52.1       | sdz-28    | chrII  | -0.678519 | 0.001059 |
| C24H11.3    | tbx-38    | chrIII | -0.678664 | 0.002840 |
| W05E10.3    | ceh-32    | chrV   | -0.682408 | 0.000543 |
| F56D6.10    | dct-8     | chrIV  | -0.682991 | 0.000565 |
| F44F1.6     | F44F1.6   | chrI   | -0.683820 | 0.010386 |
| R07C3.1     | clec-43   | chrII  | -0.686313 | 0.002641 |
| B0213.15    | cyp-34A9  | chrV   | -0.689534 | 0.000323 |
| F57H12.3    | ora-1     | chrIV  | -0.690872 | 0.001117 |
| M142.2      | cut-6     | chrIII | -0.692695 | 0.020015 |
| Y40B1B.3    | fbxb-66   | chrI   | -0.694567 | 0.003645 |
| Y46H3A.2    | hsp-16.41 | chrV   | -0.694572 | 0.020544 |
| F27E11.3    | cfz-2     | chrV   | -0.695151 | 0.002393 |
| F28D1.5     | thn-2     | chrIV  | -0.696238 | 0.000166 |
| C07H4.1     | C07H4.1   | chrII  | -0.696696 | 0.006068 |
| Y43F8A.3    | Y43F8A.3  | chrV   | -0.697025 | 0.006371 |
| F38C2.5     | ccch-2    | chrIV  | -0.700856 | 0.010591 |
| F45C12.6    | btb-8     | chrII  | -0.701585 | 0.006764 |
| F58F6.1     | col-104   | chrIV  | -0.702578 | 0.007842 |
| F59A1.10    | F59A1.10  | chrV   | -0.705296 | 0.000697 |
| T15H9.6     | T15H9.6   | chrII  | -0.706020 | 0.000685 |
| W09G12.4    | dsl-1     | chrIV  | -0.708412 | 0.006678 |
| F09B9.1     | oac-14    | chrX   | -0.710033 | 0.000773 |
| F14D12.5    | sulp-2    | chrX   | -0.710790 | 0.000296 |
| R08E3.2     | R08E3.2   | chrX   | -0.713965 | 0.000255 |
| F43D9.1     | F43D9.1   | chrIII | -0.714740 | 0.012322 |
| F23D12.5    | F23D12.5  | chrX   | -0.719097 | 0.003721 |
| F56A12.1    | unc-39    | chrV   | -0.719475 | 0.006333 |
| C23H3.7     | tre-5     | chrII  | -0.719877 | 0.022049 |
| F49E11.11   | scl-3     | chrIV  | -0.721942 | 0.019334 |
| F22B5.3     | cut-3     | chrII  | -0.724568 | 0.003914 |
| Y105C5B.13  | skr-10    | chrIV  | -0.726308 | 0.000208 |
| AC3.7       | ugt-1     | chrV   | -0.728365 | 0.002577 |
| F38A1.10    | clec-165  | chrIV  | -0.729037 | 0.008923 |
| F15B9.6     | F15B9.6   | chrV   | -0.729880 | 0.000208 |
| T02B5.3     | T02B5.3   | chrV   | -0.731678 | 0.043068 |
| T13F2.8     | cav-1     | chrIV  | -0.731877 | 0.000049 |
| F23F12.9    | F23F12.9  | chrIII | -0.731936 | 0.000160 |
| ZC513.8     | col-43    | chrV   | -0.732897 | 0.000667 |
| ZK1251.2    | ins-7     | chrIV  | -0.733743 | 0.008536 |
| Y23H5B.1    | Y23H5B.1  | chrI   | -0.734767 | 0.002865 |
| F53F1.6     | F53F1.6   | chrV   | -0.734863 | 0.034811 |
| Y39B6A.27   | Y39B6A.27 | chrV   | -0.734933 | 0.023884 |
| Y39G10AR.10 | epg-2     | chrI   | -0.735425 | 0.000051 |
| Y58G8A.1    | lgc-26    | chrV   | -0.735655 | 0.011785 |
| F47C12.1    | F47C12.1  | chrIV  | -0.741605 | 0.033186 |
| F44F1.7     | vet-6     | chrI   | -0.743853 | 0.000162 |
| T08B1.6     | acs-3     | chrV   | -0.745393 | 0.007954 |
| C15H9.1     | nnt-1     | chrX   | -0.748707 | 0.000328 |
| R07C3.6     | fbxc-28   | chrII  | -0.749533 | 0.000386 |
| R07D5.2     | R07D5.2   | chrX   | -0.750136 | 0.043068 |
| F53B6.9     | fip-6     | chrI   | -0.754789 | 0.001006 |
| C35E7.5     | C35E7.5   | chrI   | -0.756786 | 0.000024 |
| T07C4.2     | tbx-8     | chrIII | -0.758005 | 0.003100 |
| T08E11.6    | fbxb-10   | chrII  | -0.762115 | 0.004152 |
| R07C3.7     | fbxc-29   | chrII  | -0.763761 | 0.003939 |
| F34D6.1     | F34D6.1   | chrII  | -0.765225 | 0.007842 |
| ZC373.7     | col-176   | chrX   | -0.765351 | 0.023277 |
| T22G5.7     | spp-12    | chrV   | -0.768171 | 0.001117 |
| Y63D3A.2    | fbxb-100  | chrI   | -0.768348 | 0.021975 |
| R52.8       | math-36   | chrII  | -0.768805 | 0.040743 |
| Y4C6B.2     | Y4C6B.2   | chrIV  | -0.775572 | 0.002230 |
| T01B10.5    | T01B10.5  | chrX   | -0.779102 | 0.047731 |

|           |           |        |           |          |
|-----------|-----------|--------|-----------|----------|
| C09F9.2   | C09F9.2   | chrII  | -0.781114 | 0.000353 |
| C08F1.6   | C08F1.6   | chrII  | -0.781913 | 0.000082 |
| Y46G5A.27 | pes-10    | chrII  | -0.784231 | 0.000328 |
| C02C2.3   | cup-4     | chrIII | -0.785404 | 0.001627 |
| F53B2.6   | ham-1     | chrIV  | -0.787454 | 0.000082 |
| F48C1.9   | F48C1.9   | chrI   | -0.788014 | 0.000025 |
| F17E9.11  | lys-10    | chrIV  | -0.795362 | 0.000640 |
| R08C7.13  | fbxb-75   | chrIV  | -0.800039 | 0.003607 |
| C36B1.6   | C36B1.6   | chrI   | -0.803994 | 0.003876 |
| F48C5.1   | F48C5.1   | chrX   | -0.807079 | 0.012504 |
| C08F1.10  | C08F1.10  | chrII  | -0.812586 | 0.000208 |
| F38B7.2   | F38B7.2   | chrV   | -0.814025 | 0.004525 |
| T19C3.5   | T19C3.5   | chrIII | -0.814407 | 0.000032 |
| F15A4.13  | fbxb-102  | chrII  | -0.815476 | 0.006767 |
| T25C12.2  | spp-9     | chrX   | -0.815568 | 0.003984 |
| F36H5.5   | fbxb-53   | chrII  | -0.822407 | 0.026099 |
| K09F6.8   | fbxc-25   | chrII  | -0.823109 | 0.000278 |
| T12D8.5   | T12D8.5   | chrIII | -0.823494 | 0.000015 |
| B0238.12  | B0238.12  | chrV   | -0.826701 | 0.000011 |
| Y57A10C.1 | Y57A10C.1 | chrII  | -0.827086 | 0.013481 |
| T21H8.5   | T21H8.5   | chrX   | -0.830056 | 0.004962 |
| F27E11.2  | F27E11.2  | chrV   | -0.843972 | 0.023423 |
| W03D2.1   | pqn-75    | chrIV  | -0.848084 | 0.000008 |
| T26H2.1   | fbxb-1    | chrV   | -0.851488 | 0.010386 |
| T09B9.2   | T09B9.2   | chrX   | -0.851821 | 0.002233 |
| H08J11.2  | H08J11.2  | chrX   | -0.854482 | 0.002641 |
| F16B4.7   | F16B4.7   | chrV   | -0.858017 | 0.010908 |
| K05F6.2   | fbxb-50   | chrII  | -0.861307 | 0.012929 |
| T02D1.6   | T02D1.6   | chrIV  | -0.867548 | 0.031796 |
| K05F6.5   | fbxb-44   | chrII  | -0.880235 | 0.002497 |
| F39D8.1   | pqn-36    | chrX   | -0.881374 | 0.000005 |
| K06A1.3   | cutl-16   | chrII  | -0.881818 | 0.000275 |
| F08D12.9  | sdz-10    | chrII  | -0.883896 | 0.010386 |
| F40E10.1  | hch-1     | chrX   | -0.892435 | 0.000012 |
| T07G12.5  | T07G12.5  | chrIV  | -0.895131 | 0.000011 |
| F36G9.12  | oac-20    | chrV   | -0.897446 | 0.000009 |
| F28D1.3   | thn-1     | chrIV  | -0.898014 | 0.000019 |
| C06E8.5   | C06E8.5   | chrIII | -0.903528 | 0.023461 |
| F28F5.6   | F28F5.6   | chrIII | -0.903870 | 0.000205 |
| W03A3.1   | ceh-10    | chrIII | -0.904248 | 0.001618 |
| M18.1     | col-129   | chrIV  | -0.907056 | 0.000153 |
| T04B8.3   | arrd-1    | chrII  | -0.908851 | 0.000003 |
| C28A5.4   | ceh-43    | chrIII | -0.913908 | 0.000001 |
| R13A1.3   | R13A1.3   | chrIV  | -0.914269 | 0.018777 |
| T23E7.6   | T23E7.6   | chrX   | -0.916227 | 0.000173 |
| F55D10.1  | aman-1    | chrX   | -0.918635 | 0.000000 |
| F52E10.5  | ifa-3     | chrX   | -0.919222 | 0.018661 |
| F21H7.2   | F21H7.2   | chrV   | -0.920287 | 0.011539 |
| T16A1.8   | fbxb-37   | chrII  | -0.921938 | 0.001438 |
| Y113G7B.2 | srh-217   | chrV   | -0.923477 | 0.048792 |
| T08H4.2   | T08H4.2   | chrII  | -0.923825 | 0.018777 |
| M162.5    | M162.5    | chrV   | -0.938311 | 0.000011 |
| H32K16.2  | H32K16.2  | chrI   | -0.950512 | 0.021101 |
| Y17G9B.7  | fbxb-77   | chrIV  | -0.952386 | 0.008001 |
| C41H7.8   | sdz-5     | chrII  | -0.954181 | 0.003543 |
| C39E6.4   | mls-2     | chrX   | -0.960550 | 0.000031 |
| F08D12.8  | fbxb-105  | chrII  | -0.960676 | 0.022267 |
| M03A1.8   | M03A1.8   | chrII  | -0.960731 | 0.001752 |
| C24B9.9   | dod-3     | chrV   | -0.964398 | 0.000000 |
| C37A5.3   | C37A5.3   | chrI   | -0.967059 | 0.000359 |
| C10H11.5  | ugt-27    | chrI   | -0.972825 | 0.001752 |
| ZC116.3   | ZC116.3   | chrV   | -0.989056 | 0.000001 |
| F23F12.4  | sdz-15    | chrIII | -0.992174 | 0.019849 |

|            |            |        |           |          |
|------------|------------|--------|-----------|----------|
| Y82E9BR.17 | Y82E9BR.17 | chrIII | -0.995507 | 0.000000 |
| Y46E12A.1  | cnc-6      | chrIII | -0.997405 | 0.000301 |
| T11A5.5    | sdz-31     | chrV   | -0.997723 | 0.018661 |
| E01G4.6    | E01G4.6    | chrII  | -1.000471 | 0.000002 |
| F08G2.5    | F08G2.5    | chrII  | -1.004800 | 0.000000 |
| ZK75.2     | ins-2      | chrII  | -1.013967 | 0.000432 |
| H39E23.3   | H39E23.3   | chrV   | -1.014243 | 0.000005 |
| F57H12.6   | F57H12.6   | chrIV  | -1.021526 | 0.000001 |
| T26H2.4    | fbxb-116   | chrV   | -1.030806 | 0.034021 |
| C09G5.6    | bli-1      | chrII  | -1.035076 | 0.007228 |
| C02F5.11   | tsp-2      | chrIII | -1.046783 | 0.001435 |
| W01C9.2    | W01C9.2    | chrII  | -1.052083 | 0.000082 |
| C04F6.3    | cht-1      | chrX   | -1.062398 | 0.000000 |
| C25B8.4    | clcc-266   | chrX   | -1.068328 | 0.000000 |
| C05G5.5    | C05G5.5    | chrX   | -1.072527 | 0.001198 |
| F54C9.4    | col-38     | chrII  | -1.098099 | 0.000000 |
| R08C7.9    | fbxb-74    | chrIV  | -1.099687 | 0.000431 |
| ZK1037.6   | ZK1037.6   | chrV   | -1.104776 | 0.000000 |
| B0272.1    | tbb-4      | chrX   | -1.109754 | 0.000000 |
| F15E6.10   | F15E6.10   | chrIV  | -1.126697 | 0.001217 |
| C13D9.8    | ncx-9      | chrV   | -1.134550 | 0.000036 |
| F02D10.1   | col-183    | chrX   | -1.142943 | 0.000000 |
| C13D9.1    | srr-6      | chrV   | -1.145104 | 0.000002 |
| C37A5.2    | fipr-22    | chrI   | -1.154393 | 0.000045 |
| F47G4.6    | F47G4.6    | chrI   | -1.155147 | 0.001752 |
| F13B9.6    | cutl-29    | chrX   | -1.159415 | 0.006832 |
| C10A4.9    | C10A4.9    | chrX   | -1.159457 | 0.038854 |
| F52F10.3   | oac-31     | chrV   | -1.168072 | 0.000014 |
| F58E1.8    | fbxb-18    | chrII  | -1.174769 | 0.000037 |
| C50F7.5    | C50F7.5    | chrIV  | -1.194524 | 0.000000 |
| C37A5.8    | fipr-24    | chrI   | -1.220392 | 0.000137 |
| Y105C5B.3  | Y105C5B.3  | chrIV  | -1.223816 | 0.000008 |
| M195.1     | col-77     | chrII  | -1.224213 | 0.000000 |
| R13H4.3    | pho-8      | chrV   | -1.237102 | 0.000000 |
| T26H5.9    | T26H5.9    | chrV   | -1.254328 | 0.000000 |
| F40G9.12   | F40G9.12   | chrIII | -1.255492 | 0.044377 |
| B0213.16   | cyp-34A10  | chrV   | -1.256589 | 0.031972 |
| F47H4.10   | skr-5      | chrV   | -1.288666 | 0.007783 |
| F53B6.8    | fipr-26    | chrI   | -1.291139 | 0.000298 |
| C37A5.4    | fipr-23    | chrI   | -1.307051 | 0.001247 |
| Y48G9A.10  | cpt-3      | chrIII | -1.338888 | 0.000000 |
| F48F7.7    | arrd-24    | chrX   | -1.351614 | 0.031972 |
| C08E3.6    | fbxa-163   | chrII  | -1.401005 | 0.000012 |
| Y46H3A.5   | Y46H3A.5   | chrV   | -1.453525 | 0.008378 |
| T27F2.4    | T27F2.4    | chrV   | -1.453693 | 0.000000 |
| F52B11.4   | col-133    | chrIV  | -1.464781 | 0.000000 |
| C18C4.7    | C18C4.7    | chrV   | -1.501308 | 0.037866 |
| T08B2.4    | T08B2.4    | chrI   | -1.501548 | 0.047731 |
| Y49F6B.10  | col-71     | chrII  | -1.512076 | 0.000000 |
| F44A2.7    | F44A2.7    | chrV   | -1.578768 | 0.000026 |
| C50F7.2    | clx-1      | chrIV  | -1.609805 | 0.009262 |
| F15E11.15  | F15E11.15  | chrV   | -1.611369 | 0.000000 |
| Y105C5A.13 | Y105C5A.13 | chrIV  | -1.611910 | 0.000368 |
| R155.2     | R155.2     | chrIII | -1.614797 | 0.023955 |
| C35D10.2   | C35D10.2   | chrIII | -1.624450 | 0.002500 |
| Y69E1A.2   | Y69E1A.2   | chrIV  | -1.626593 | 0.021101 |
| W03D2.9    | W03D2.9    | chrIV  | -1.630658 | 0.049035 |
| F53A9.2    | F53A9.2    | chrX   | -1.645416 | 0.000000 |
| Y51H7C.13  | Y51H7C.13  | chrII  | -1.732550 | 0.000000 |
| F59E12.12  | bli-2      | chrII  | -1.752674 | 0.000006 |
| F15E11.12  | F15E11.12  | chrV   | -1.832661 | 0.000000 |
| F09F9.3    | F09F9.3    | chrX   | -1.852619 | 0.001423 |
| C02E7.1    | catp-2     | chrV   | -1.881777 | 0.004965 |

|            |           |        |           |          |
|------------|-----------|--------|-----------|----------|
| C35D10.11  | msd-4     | chrIII | -1.885235 | 0.012504 |
| ZK355.3    | ZK355.3   | chrII  | -1.889894 | 0.004965 |
| Y47D7A.15  | Y47D7A.15 | chrV   | -1.893197 | 0.000010 |
| T22B3.2    | T22B3.2   | chrIV  | -1.912295 | 0.043068 |
| F44G3.10   | F44G3.10  | chrV   | -1.925465 | 0.012110 |
| Y47G6A.15  | Y47G6A.15 | chrI   | -1.938283 | 0.000000 |
| F17E9.5    | F17E9.5   | chrIV  | -1.969589 | 0.006767 |
| Y38C1AA.7  | Y38C1AA.7 | chrIV  | -1.973344 | 0.006818 |
| F56F3.7    | F56F3.7   | chrIII | -1.973767 | 0.012504 |
| F22D6.10   | col-60    | chrI   | -1.980712 | 0.000000 |
| T10E9.4    | T10E9.4   | chrI   | -1.996570 | 0.012504 |
| Y11D7A.11  | col-120   | chrIV  | -2.195550 | 0.000000 |
| D1086.9    | D1086.9   | chrV   | -2.202498 | 0.000000 |
| T19D12.5   | T19D12.5  | chrII  | -2.323152 | 0.000000 |
| ZK484.5    | ZK484.5   | chrI   | -2.327358 | 0.000301 |
| E02H4.8    | E02H4.8   | chrX   | -2.330181 | 0.022183 |
| M05D6.10   | M05D6.10  | chrII  | -2.497878 | 0.041725 |
| Y25C1A.1   | clcc-123  | chrII  | -2.582826 | 0.010385 |
| B0025.5    | B0025.5   | chrI   | -2.641470 | 0.028473 |
| R09E10.6   | R09E10.6  | chrIV  | -2.654963 | 0.001202 |
| F32H2.7    | F32H2.7   | chrI   | -2.721477 | 0.013001 |
| Y57G11A.2  | Y57G11A.2 | chrIV  | -2.767539 | 0.000002 |
| ZK757.3    | tag-76    | chrIII | -3.013542 | 0.004114 |
| ZK265.3    | ZK265.3   | chrI   | -3.041660 | 0.013001 |
| W05G11.3   | col-88    | chrIII | -3.159887 | 0.000000 |
| Y113G7C.1  | Y113G7C.1 | chrV   | -3.279937 | 0.000196 |
| C52D10.13  | col-138   | chrIV  | -3.292285 | 0.000000 |
| Y73B6BL.34 | col-112   | chrIV  | -3.581855 | 0.000000 |
| ZK265.2    | col-63    | chrI   | -3.653110 | 0.000000 |
| ZC116.2    | cyc-2.2   | chrV   | -3.747489 | 0.011478 |
| K09H9.3    | col-49    | chrI   | -3.868511 | 0.000000 |
| C35B8.1    | col-175   | chrX   | -3.883209 | 0.000000 |
| Y57A10A.11 | rol-1     | chrII  | -4.259824 | 0.000000 |
| T25B9.6    | T25B9.6   | chrIV  | -4.696853 | 0.018741 |
| ZC373.6    | dao-4     | chrX   | -5.169136 | 0.001151 |

---

**Supplemental Table 5: Differentially Expressed RNAs After 10 days Rotenone Treatment**

| <b>Ensembl Gene Id</b> | <b>Gene Symbol</b> | <b>Chromosome</b> | <b>log2 Fold Change</b> | <b>P-Value</b> |
|------------------------|--------------------|-------------------|-------------------------|----------------|
| Y74C9A.6               | Y74C9A.6           | chrI              | 2.035104                | 0.000009       |
| F31C3.11               | rrn-2.1            | chrI              | 1.868771                | 0.000000       |
| E04F6.16               | mrpr-1             | chrII             | 1.213878                | 0.000198       |
| C25A1.6                | C25A1.6            | chrI              | 0.188746                | 0.029854       |
| T03F6.6                | T03F6.6            | chrIII            | -0.660935               | 0.010049       |
| ZC116.3                | ZC116.3            | chrV              | -1.098351               | 0.036335       |
| W03F11.4               | W03F11.4           | chrI              | -1.147467               | 0.021486       |
| T10E9.4                | T10E9.4            | chrI              | -1.242433               | 0.004925       |
| T27A3.5                | T27A3.5            | chrI              | -1.308133               | 0.010763       |
| F58E6.5                | F58E6.5            | chrV              | -1.344995               | 0.025721       |
| M70.3                  | M70.3              | chrIV             | -1.388917               | 0.007612       |
| K02E11.1               | ent-3              | chrV              | -1.395506               | 0.040970       |
| ZK1010.5               | ZK1010.5           | chrIII            | -1.422655               | 0.020998       |
| C36H8.1                | C36H8.1            | chrIV             | -1.437580               | 0.019760       |
| ZK484.5                | ZK484.5            | chrI              | -1.479688               | 0.002125       |
| F27C1.1                | F27C1.1            | chrI              | -1.636889               | 0.012616       |
| C35D10.11              | msd-4              | chrIII            | -1.744538               | 0.002539       |
| C04G2.9                | C04G2.9            | chrIV             | -1.750036               | 0.000013       |
| Y113G7C.1              | Y113G7C.1          | chrV              | -1.753657               | 0.000104       |
| ZK945.7                | ZK945.7            | chrII             | -1.833260               | 0.036335       |
| C33F10.1               | C33F10.1           | chrII             | -1.840554               | 0.004582       |
| ZK757.3                | tag-76             | chrIII            | -1.962524               | 0.030526       |
| C10G11.8               | C10G11.8           | chrI              | -2.005861               | 0.001085       |
| T27A3.3                | ssp-16             | chrI              | -2.070751               | 0.010021       |
| T28H11.5               | ssq-2              | chrIV             | -2.164614               | 0.002539       |
| R09E10.6               | R09E10.6           | chrIV             | -2.264185               | 0.004925       |
| K03H1.1                | gln-2              | chrIII            | -2.482814               | 0.005593       |

**Supplemental Table 6: Differentially Expressed RNAs After 20 days Rotenone Treatment**

| <b>Ensembl Gene Id</b> | <b>Gene Symbol</b> | <b>Chromosome</b> | <b>log2 Fold Change</b> | <b>P-Value</b> |
|------------------------|--------------------|-------------------|-------------------------|----------------|
| M195.1                 | col-77             | chrII             | 2.555114                | 0.022364       |
| Y73B6BL.34             | col-112            | chrIV             | 2.071675                | 0.000269       |
| K02E11.10              | K02E11.10          | chrV              | 2.055226                | 0.003619       |
| W05G11.3               | col-88             | chrIII            | 1.997187                | 0.000000       |
| K12B6.3                | fil-2              | chrV              | 1.946279                | 0.016608       |
| F56D6.9                | F56D6.9            | chrIV             | 1.897126                | 0.038547       |
| K10D11.1               | dod-17             | chrIV             | 1.870417                | 0.007033       |
| C37A5.5                | C37A5.5            | chrI              | 1.858971                | 0.001396       |
| D1086.9                | D1086.9            | chrV              | 1.139823                | 0.000001       |
| F31C3.11               | rrn-2.1            | chrI              | 1.118208                | 0.000178       |
| C50F7.2                | clx-1              | chrIV             | 0.702242                | 0.008750       |
| C02D5.3                | gsto-2             | chrIII            | 0.634847                | 0.009044       |
| C37A5.6                | C37A5.6            | chrI              | 0.626815                | 0.000000       |
| F55G11.4               | F55G11.4           | chrIV             | 0.619504                | 0.014429       |
| F15E6.8                | dct-7              | chrIV             | 0.454087                | 0.000000       |
| F30H5.2                | nlp-32             | chrIII            | 0.389356                | 0.000000       |
| Y32G9A.1               | gst-37             | chrV              | 0.357717                | 0.000000       |
| T09F5.9                | clcc-47            | chrV              | 0.353625                | 0.000206       |
| C17H12.8               | C17H12.8           | chrIV             | 0.350974                | 0.038547       |
| T10B5.8                | T10B5.8            | chrV              | 0.330074                | 0.002350       |
| M02D8.4                | asns-2             | chrX              | 0.315919                | 0.000000       |
| F23F12.12              | F23F12.12          | chrIII            | 0.311040                | 0.007491       |
| C03G6.14               | cyp-35A1           | chrV              | 0.289633                | 0.001551       |
| F18E3.12               | F18E3.12           | chrV              | 0.286226                | 0.001866       |
| C41H7.7                | clcc-3             | chrII             | 0.256160                | 0.000000       |
| R13D11.3               | R13D11.3           | chrV              | 0.248591                | 0.038547       |
| H39E23.3               | H39E23.3           | chrV              | 0.221666                | 0.000000       |
| F56D6.10               | dct-8              | chrIV             | 0.203521                | 0.000549       |
| F56D6.8                | F56D6.8            | chrIV             | 0.192618                | 0.000000       |
| C30F8.3                | C30F8.3            | chrI              | 0.155185                | 0.000000       |
| Y39B6A.1               | Y39B6A.1           | chrV              | 0.119116                | 0.000039       |
| C37A5.4                | fipr-23            | chrI              | 0.105401                | 0.002340       |
| F15B9.1                | far-3              | chrV              | 0.099509                | 0.000500       |
| R03D7.6                | gst-5              | chrII             | 0.088526                | 0.021535       |
| ZK355.3                | ZK355.3            | chrII             | 0.085667                | 0.023253       |
| K01A6.4                | K01A6.4            | chrIV             | 0.075952                | 0.001396       |
| K07C6.5                | cyp-35A5           | chrV              | 0.063381                | 0.002340       |
| Y41G9A.10              | Y41G9A.10          | chrX              | 0.036233                | 0.038547       |
| F36D3.9                | cpr-2              | chrV              | 0.026054                | 0.000026       |
| C27H5.6                | C27H5.6            | chrII             | -0.037196               | 0.026891       |
| F08G2.5                | F08G2.5            | chrII             | -0.038945               | 0.005661       |
| ZK1058.6               | nit-1              | chrIII            | -0.041329               | 0.000009       |
| C10H11.3               | ugt-25             | chrI              | -0.042292               | 0.000782       |
| F41E7.5                | fipr-21            | chrX              | -0.043298               | 0.000040       |
| F23F12.3               | F23F12.3           | chrIII            | -0.045529               | 0.000206       |
| T22G5.7                | spp-12             | chrV              | -0.046125               | 0.000241       |
| F57H12.6               | F57H12.6           | chrIV             | -0.062920               | 0.000000       |
| T04C12.7               | T04C12.7           | chrV              | -0.065367               | 0.037887       |
| F16B4.4                | F16B4.4            | chrV              | -0.072393               | 0.014437       |
| C45B2.3                | C45B2.3            | chrX              | -0.087379               | 0.026880       |
| C37A5.8                | fipr-24            | chrI              | -0.097012               | 0.000012       |
| F37H8.3                | F37H8.3            | chrII             | -0.098163               | 0.045161       |
| Y46C8AL.8              | clcc-74            | chrIV             | -0.099002               | 0.000772       |
| F37B1.1                | gst-24             | chrII             | -0.117389               | 0.030349       |
| B0454.7                | clcc-2             | chrII             | -0.125154               | 0.000206       |
| C23G10.6               | C23G10.6           | chrIII            | -0.127511               | 0.000000       |
| Y46E12A.1              | cnc-6              | chrIII            | -0.130776               | 0.000000       |
| F57H12.3               | ora-1              | chrIV             | -0.142512               | 0.000000       |
| F22B7.4                | fip-1              | chrIII            | -0.153224               | 0.000000       |

|           |           |       |           |          |
|-----------|-----------|-------|-----------|----------|
| C35A5.2   | ugt-33    | chrV  | -0.203601 | 0.000005 |
| C18C4.7   | C18C4.7   | chrV  | -0.214208 | 0.000026 |
| F35E12.5  | F35E12.5  | chrV  | -0.238797 | 0.000920 |
| R09E12.9  | R09E12.9  | chrV  | -0.240433 | 0.001885 |
| F38E11.1  | hsp-12.3  | chrIV | -0.246427 | 0.037811 |
| T05A8.2   | T05A8.2   | chrII | -0.291229 | 0.030988 |
| F32A7.8   | F32A7.8   | chrI  | -0.325210 | 0.000216 |
| ZK355.8   | ZK355.8   | chrII | -0.350310 | 0.021535 |
| T28H11.5  | ssq-2     | chrIV | -0.363508 | 0.021535 |
| K07B1.1   | try-5     | chrV  | -0.371227 | 0.009987 |
| R09B5.2   | cnc-1     | chrV  | -0.380489 | 0.000000 |
| C54E10.2  | C54E10.2  | chrV  | -0.417289 | 0.017978 |
| F29F11.2  | ugt-34    | chrV  | -0.572028 | 0.000000 |
| F57B1.4   | col-160   | chrV  | -0.579976 | 0.044984 |
| K09H9.3   | col-49    | chrI  | -0.582559 | 0.003619 |
| K09C4.1   | K09C4.1   | chrX  | -0.679802 | 0.047674 |
| R13D11.10 | R13D11.10 | chrV  | -0.692673 | 0.017978 |
| K09C8.3   | nas-10    | chrX  | -0.730730 | 0.000024 |
| ZC239.7   | gcy-15    | chrII | -0.740095 | 0.015783 |
| M18.1     | col-129   | chrIV | -1.794147 | 0.048237 |

---
