# Supplementary material
Source: PubMed Central journal article supplement (PMC3817383)

Fig. S1

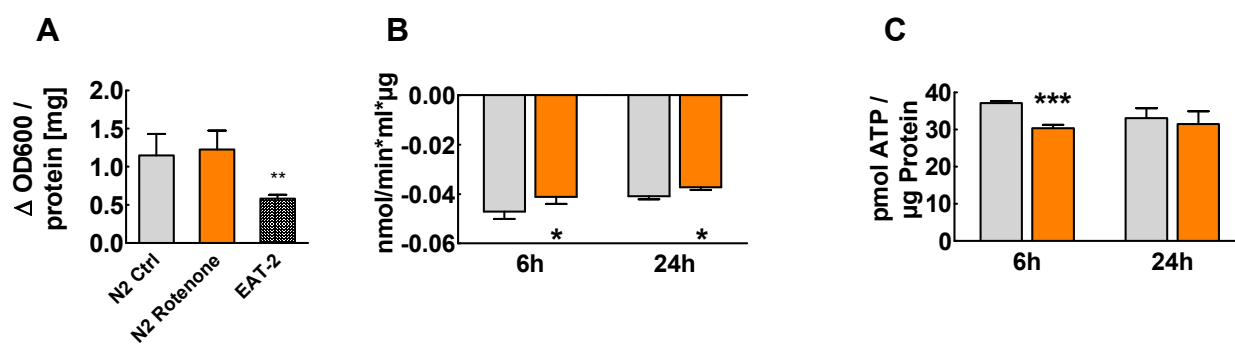

Fig. S2

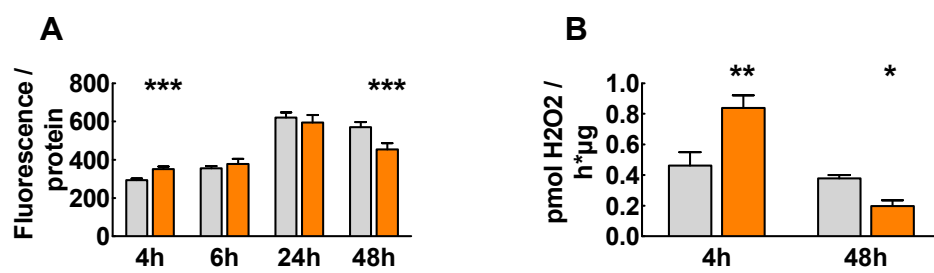

Supplement: mmc1.pdf [file mmc1.pdf]
